# Supplementary material for: Transcriptomic analysis reveals key genes related to antioxidant mechanisms of Hylocereus undatus quality improvement by trypsin during storage
Source: Royal Society of Chemistry journal article supplement (doi:10.1039/c9fo00809h), 2019-01-01
Supplement: c9fo00809h4.xlsx [file c9fo00809h4.xlsx]

## Sheet: Common elements in all
Common elements in NR Swiss-Prot Pfam COG GO KEGG :
TRINITY_DN35664_c0_g1
TRINITY_DN35604_c0_g1
TRINITY_DN35607_c0_g1
TRINITY_DN15937_c0_g1
TRINITY_DN41061_c0_g1
TRINITY_DN41090_c0_g1
TRINITY_DN41093_c0_g2
TRINITY_DN41039_c0_g1
TRINITY_DN41051_c0_g1
TRINITY_DN41055_c0_g1
TRINITY_DN41085_c0_g1
TRINITY_DN41058_c0_g1
TRINITY_DN41040_c0_g1
TRINITY_DN39500_c0_g1
TRINITY_DN39501_c0_g1
TRINITY_DN39510_c0_g2
TRINITY_DN19339_c0_g1
TRINITY_DN37148_c0_g1
TRINITY_DN37157_c0_g1
TRINITY_DN37126_c0_g1
TRINITY_DN37187_c0_g1
TRINITY_DN37108_c0_g1
TRINITY_DN2024_c0_g1
TRINITY_DN16792_c0_g1
TRINITY_DN27531_c0_g1
TRINITY_DN90420_c0_g1
TRINITY_DN33038_c0_g1
TRINITY_DN33010_c0_g1
TRINITY_DN34067_c0_g1
TRINITY_DN34065_c1_g1
TRINITY_DN34043_c0_g1
TRINITY_DN27669_c0_g1
TRINITY_DN39917_c0_g1
TRINITY_DN39926_c0_g1
TRINITY_DN39989_c0_g1
TRINITY_DN56258_c0_g1
TRINITY_DN2996_c0_g1
TRINITY_DN49122_c4_g1
TRINITY_DN49109_c0_g1
TRINITY_DN49163_c1_g2
TRINITY_DN49120_c0_g1
TRINITY_DN49104_c0_g1
TRINITY_DN49113_c0_g1
TRINITY_DN49156_c0_g1
TRINITY_DN49168_c0_g1
TRINITY_DN49159_c1_g1
TRINITY_DN49159_c2_g1
TRINITY_DN49108_c1_g1
TRINITY_DN49132_c2_g1
TRINITY_DN49181_c5_g1
TRINITY_DN49181_c5_g2
TRINITY_DN49181_c6_g2
TRINITY_DN49167_c0_g1
TRINITY_DN49123_c0_g1
TRINITY_DN27972_c0_g1
TRINITY_DN27990_c0_g1
TRINITY_DN27964_c0_g2
TRINITY_DN78557_c0_g1
TRINITY_DN78562_c0_g1
TRINITY_DN16130_c0_g1
TRINITY_DN93840_c0_g1
TRINITY_DN51617_c0_g1
TRINITY_DN51671_c1_g1
TRINITY_DN51675_c0_g2
TRINITY_DN51650_c1_g1
TRINITY_DN51601_c1_g1
TRINITY_DN51678_c1_g2
TRINITY_DN51679_c4_g1
TRINITY_DN51629_c2_g1
TRINITY_DN51688_c1_g1
TRINITY_DN51610_c2_g1
TRINITY_DN51677_c0_g2
TRINITY_DN51677_c0_g1
TRINITY_DN51619_c0_g1
TRINITY_DN51646_c4_g2
TRINITY_DN51603_c2_g1
TRINITY_DN51636_c2_g1
TRINITY_DN51647_c1_g1
TRINITY_DN51647_c2_g1
TRINITY_DN37805_c0_g1
TRINITY_DN32104_c0_g1
TRINITY_DN53382_c0_g1
TRINITY_DN51792_c2_g2
TRINITY_DN51792_c3_g1
TRINITY_DN51706_c0_g2
TRINITY_DN51762_c0_g1
TRINITY_DN51796_c2_g1
TRINITY_DN51774_c2_g1
TRINITY_DN51774_c2_g2
TRINITY_DN51764_c1_g2
TRINITY_DN51743_c0_g1
TRINITY_DN51753_c0_g1
TRINITY_DN51747_c5_g1
TRINITY_DN51745_c0_g1
TRINITY_DN51701_c4_g1
TRINITY_DN51783_c1_g1
TRINITY_DN51741_c1_g1
TRINITY_DN51741_c3_g1
TRINITY_DN51741_c4_g1
TRINITY_DN51781_c1_g3
TRINITY_DN51778_c0_g1
TRINITY_DN51763_c0_g1
TRINITY_DN51780_c0_g4
TRINITY_DN51713_c0_g1
TRINITY_DN51760_c1_g1
TRINITY_DN51760_c2_g1
TRINITY_DN51731_c1_g1
TRINITY_DN31165_c0_g1
TRINITY_DN31166_c0_g1
TRINITY_DN52343_c0_g3
TRINITY_DN52390_c1_g1
TRINITY_DN52379_c0_g1
TRINITY_DN52362_c1_g1
TRINITY_DN52303_c0_g1
TRINITY_DN46593_c0_g2
TRINITY_DN46593_c0_g3
TRINITY_DN46583_c1_g1
TRINITY_DN46583_c2_g1
TRINITY_DN46503_c1_g1
TRINITY_DN46526_c2_g1
TRINITY_DN46525_c0_g1
TRINITY_DN46582_c0_g1
TRINITY_DN46579_c0_g1
TRINITY_DN46535_c0_g2
TRINITY_DN46535_c0_g1
TRINITY_DN46589_c1_g1
TRINITY_DN39408_c0_g1
TRINITY_DN39475_c0_g1
TRINITY_DN39475_c0_g2
TRINITY_DN39471_c0_g1
TRINITY_DN50504_c0_g1
TRINITY_DN50542_c0_g1
TRINITY_DN50533_c0_g1
TRINITY_DN50587_c0_g1
TRINITY_DN50566_c0_g2
TRINITY_DN50566_c1_g1
TRINITY_DN50526_c0_g1
TRINITY_DN50589_c0_g1
TRINITY_DN50589_c1_g1
TRINITY_DN50588_c1_g1
TRINITY_DN50588_c1_g4
TRINITY_DN50546_c0_g1
TRINITY_DN50554_c0_g1
TRINITY_DN50513_c0_g2
TRINITY_DN50524_c2_g1
TRINITY_DN50523_c2_g1
TRINITY_DN3201_c0_g1
TRINITY_DN43890_c0_g1
TRINITY_DN43843_c0_g1
TRINITY_DN43884_c0_g1
TRINITY_DN43859_c0_g1
TRINITY_DN43833_c0_g1
TRINITY_DN43851_c0_g2
TRINITY_DN43842_c1_g1
TRINITY_DN43869_c0_g1
TRINITY_DN47300_c0_g1
TRINITY_DN47305_c1_g1
TRINITY_DN47329_c0_g1
TRINITY_DN47399_c0_g1
TRINITY_DN47365_c5_g2
TRINITY_DN47302_c1_g2
TRINITY_DN47302_c1_g1
TRINITY_DN47358_c0_g1
TRINITY_DN47338_c0_g1
TRINITY_DN77333_c0_g1
TRINITY_DN98723_c0_g1
TRINITY_DN48385_c1_g2
TRINITY_DN48368_c0_g1
TRINITY_DN48313_c0_g2
TRINITY_DN48329_c0_g1
TRINITY_DN48332_c0_g2
TRINITY_DN48332_c0_g1
TRINITY_DN48332_c0_g4
TRINITY_DN48337_c0_g2
TRINITY_DN48388_c0_g3
TRINITY_DN48345_c0_g1
TRINITY_DN48352_c3_g1
TRINITY_DN48353_c0_g1
TRINITY_DN48395_c1_g1
TRINITY_DN48312_c3_g1
TRINITY_DN40081_c0_g1
TRINITY_DN40097_c0_g1
TRINITY_DN40038_c1_g1
TRINITY_DN40050_c0_g1
TRINITY_DN40077_c2_g2
TRINITY_DN48401_c0_g2
TRINITY_DN48445_c0_g1
TRINITY_DN48492_c0_g1
TRINITY_DN48427_c0_g1
TRINITY_DN48427_c2_g1
TRINITY_DN48427_c2_g4
TRINITY_DN48446_c0_g1
TRINITY_DN48486_c0_g1
TRINITY_DN48408_c1_g1
TRINITY_DN48497_c0_g2
TRINITY_DN48497_c0_g4
TRINITY_DN48441_c0_g2
TRINITY_DN48441_c0_g1
TRINITY_DN48463_c0_g1
TRINITY_DN48463_c0_g3
TRINITY_DN48485_c0_g1
TRINITY_DN48425_c1_g1
TRINITY_DN37367_c0_g1
TRINITY_DN37313_c0_g1
TRINITY_DN33644_c0_g1
TRINITY_DN33632_c1_g1
TRINITY_DN33611_c0_g1
TRINITY_DN33673_c0_g1
TRINITY_DN67526_c0_g1
TRINITY_DN37905_c1_g1
TRINITY_DN37944_c0_g1
TRINITY_DN37913_c1_g1
TRINITY_DN37988_c0_g1
TRINITY_DN37995_c0_g2
TRINITY_DN37904_c0_g1
TRINITY_DN37932_c0_g1
TRINITY_DN37903_c0_g1
TRINITY_DN37975_c0_g1
TRINITY_DN37954_c0_g1
TRINITY_DN87198_c0_g1
TRINITY_DN49809_c6_g2
TRINITY_DN49836_c1_g1
TRINITY_DN49812_c0_g1
TRINITY_DN49800_c1_g1
TRINITY_DN49837_c0_g1
TRINITY_DN49844_c1_g1
TRINITY_DN49866_c6_g2
TRINITY_DN49839_c0_g1
TRINITY_DN49830_c1_g1
TRINITY_DN49838_c0_g1
TRINITY_DN49889_c0_g1
TRINITY_DN49833_c0_g1
TRINITY_DN49875_c0_g1
TRINITY_DN49882_c0_g3
TRINITY_DN49825_c0_g1
TRINITY_DN21863_c0_g1
TRINITY_DN21803_c0_g1
TRINITY_DN21812_c0_g1
TRINITY_DN47726_c0_g1
TRINITY_DN47762_c0_g1
TRINITY_DN47701_c2_g1
TRINITY_DN47720_c1_g1
TRINITY_DN47748_c0_g1
TRINITY_DN47737_c0_g1
TRINITY_DN47790_c0_g1
TRINITY_DN47795_c0_g1
TRINITY_DN47728_c0_g1
TRINITY_DN47751_c1_g1
TRINITY_DN47714_c0_g1
TRINITY_DN47714_c1_g1
TRINITY_DN47769_c0_g1
TRINITY_DN47779_c0_g1
TRINITY_DN47755_c0_g3
TRINITY_DN47716_c0_g2
TRINITY_DN47716_c0_g3
TRINITY_DN47793_c0_g3
TRINITY_DN47739_c0_g1
TRINITY_DN43332_c0_g1
TRINITY_DN43326_c0_g1
TRINITY_DN43338_c0_g1
TRINITY_DN43385_c0_g1
TRINITY_DN43380_c0_g1
TRINITY_DN43384_c0_g1
TRINITY_DN43339_c0_g1
TRINITY_DN43350_c0_g1
TRINITY_DN43343_c0_g1
TRINITY_DN43307_c1_g1
TRINITY_DN43311_c0_g1
TRINITY_DN43381_c0_g2
TRINITY_DN43377_c1_g1
TRINITY_DN43301_c1_g1
TRINITY_DN43392_c0_g1
TRINITY_DN43367_c0_g1
TRINITY_DN42926_c0_g1
TRINITY_DN42993_c0_g1
TRINITY_DN42975_c0_g1
TRINITY_DN42917_c0_g1
TRINITY_DN42982_c0_g1
TRINITY_DN42987_c0_g1
TRINITY_DN42950_c0_g1
TRINITY_DN42981_c0_g1
TRINITY_DN42924_c0_g1
TRINITY_DN42932_c0_g1
TRINITY_DN42932_c0_g2
TRINITY_DN42958_c0_g1
TRINITY_DN42900_c1_g1
TRINITY_DN42957_c0_g1
TRINITY_DN42996_c0_g1
TRINITY_DN9337_c0_g1
TRINITY_DN69738_c0_g1
TRINITY_DN50953_c0_g1
TRINITY_DN50932_c1_g1
TRINITY_DN50919_c0_g1
TRINITY_DN50982_c0_g1
TRINITY_DN50976_c4_g2
TRINITY_DN50943_c2_g1
TRINITY_DN50929_c0_g2
TRINITY_DN50928_c0_g2
TRINITY_DN50956_c1_g1
TRINITY_DN50984_c0_g1
TRINITY_DN50942_c0_g1
TRINITY_DN50940_c1_g1
TRINITY_DN50913_c2_g1
TRINITY_DN50978_c2_g1
TRINITY_DN50986_c0_g1
TRINITY_DN50991_c1_g1
TRINITY_DN50946_c0_g1
TRINITY_DN41364_c0_g1
TRINITY_DN41368_c0_g1
TRINITY_DN41393_c0_g1
TRINITY_DN41356_c0_g2
TRINITY_DN41340_c0_g1
TRINITY_DN41361_c0_g1
TRINITY_DN41390_c0_g1
TRINITY_DN41337_c0_g1
TRINITY_DN41314_c0_g1
TRINITY_DN41382_c1_g1
TRINITY_DN41376_c0_g2
TRINITY_DN41397_c0_g1
TRINITY_DN41392_c0_g1
TRINITY_DN30053_c0_g1
TRINITY_DN30077_c0_g1
TRINITY_DN30061_c0_g1
TRINITY_DN30022_c0_g1
TRINITY_DN48177_c0_g1
TRINITY_DN48149_c1_g1
TRINITY_DN48186_c0_g1
TRINITY_DN48139_c3_g2
TRINITY_DN48163_c0_g1
TRINITY_DN48104_c0_g1
TRINITY_DN48108_c1_g1
TRINITY_DN48144_c1_g1
TRINITY_DN48103_c1_g1
TRINITY_DN48105_c0_g3
TRINITY_DN48105_c0_g2
TRINITY_DN48115_c0_g1
TRINITY_DN48185_c0_g1
TRINITY_DN86570_c0_g1
TRINITY_DN53912_c0_g1
TRINITY_DN30795_c0_g1
TRINITY_DN30775_c0_g1
TRINITY_DN30718_c0_g1
TRINITY_DN82680_c0_g1
TRINITY_DN32923_c0_g1
TRINITY_DN40915_c0_g1
TRINITY_DN40910_c0_g1
TRINITY_DN40955_c0_g1
TRINITY_DN40966_c0_g1
TRINITY_DN40988_c0_g1
TRINITY_DN57075_c0_g1
TRINITY_DN26063_c0_g1
TRINITY_DN30890_c0_g1
TRINITY_DN30816_c0_g1
TRINITY_DN93791_c0_g1
TRINITY_DN93707_c0_g1
TRINITY_DN43443_c1_g1
TRINITY_DN43440_c0_g1
TRINITY_DN43447_c0_g1
TRINITY_DN43438_c0_g1
TRINITY_DN43425_c0_g1
TRINITY_DN43493_c2_g1
TRINITY_DN43401_c0_g1
TRINITY_DN43404_c0_g1
TRINITY_DN52759_c0_g1
TRINITY_DN48965_c0_g1
TRINITY_DN48947_c0_g2
TRINITY_DN48909_c2_g1
TRINITY_DN48909_c2_g4
TRINITY_DN48980_c1_g3
TRINITY_DN48902_c0_g1
TRINITY_DN48937_c1_g1
TRINITY_DN48953_c0_g1
TRINITY_DN48951_c1_g1
TRINITY_DN48977_c0_g1
TRINITY_DN48930_c1_g1
TRINITY_DN48949_c0_g2
TRINITY_DN48949_c0_g1
TRINITY_DN36236_c0_g1
TRINITY_DN36231_c0_g1
TRINITY_DN36249_c0_g1
TRINITY_DN36201_c0_g1
TRINITY_DN35786_c0_g1
TRINITY_DN35796_c1_g1
TRINITY_DN35758_c0_g1
TRINITY_DN35754_c0_g1
TRINITY_DN42643_c0_g1
TRINITY_DN42638_c0_g1
TRINITY_DN42603_c1_g2
TRINITY_DN42627_c0_g1
TRINITY_DN42632_c0_g1
TRINITY_DN42628_c1_g1
TRINITY_DN42659_c0_g1
TRINITY_DN42698_c0_g1
TRINITY_DN42683_c0_g1
TRINITY_DN42664_c0_g1
TRINITY_DN28522_c0_g1
TRINITY_DN17395_c0_g1
TRINITY_DN44944_c1_g1
TRINITY_DN44906_c0_g1
TRINITY_DN44975_c0_g1
TRINITY_DN44999_c0_g1
TRINITY_DN44959_c0_g1
TRINITY_DN44968_c0_g1
TRINITY_DN44983_c0_g1
TRINITY_DN90129_c0_g1
TRINITY_DN47563_c3_g2
TRINITY_DN47531_c0_g1
TRINITY_DN47585_c1_g1
TRINITY_DN47525_c0_g1
TRINITY_DN47559_c0_g1
TRINITY_DN47524_c0_g1
TRINITY_DN47506_c0_g1
TRINITY_DN47596_c0_g1
TRINITY_DN47571_c0_g1
TRINITY_DN47513_c1_g1
TRINITY_DN47590_c0_g1
TRINITY_DN47521_c2_g1
TRINITY_DN47591_c1_g1
TRINITY_DN47552_c0_g2
TRINITY_DN47539_c0_g2
TRINITY_DN36601_c0_g1
TRINITY_DN36644_c0_g1
TRINITY_DN36668_c0_g1
TRINITY_DN36698_c0_g1
TRINITY_DN36652_c0_g1
TRINITY_DN28265_c0_g1
TRINITY_DN70711_c0_g1
TRINITY_DN49640_c3_g1
TRINITY_DN49679_c2_g2
TRINITY_DN49617_c0_g1
TRINITY_DN49676_c0_g2
TRINITY_DN49623_c0_g1
TRINITY_DN49623_c0_g3
TRINITY_DN49634_c0_g1
TRINITY_DN49610_c1_g1
TRINITY_DN49645_c2_g1
TRINITY_DN49601_c0_g1
TRINITY_DN49639_c0_g5
TRINITY_DN49611_c0_g1
TRINITY_DN49604_c0_g1
TRINITY_DN88355_c0_g1
TRINITY_DN88369_c0_g1
TRINITY_DN48523_c4_g1
TRINITY_DN48538_c0_g2
TRINITY_DN48571_c1_g2
TRINITY_DN48516_c2_g2
TRINITY_DN48504_c0_g1
TRINITY_DN48580_c0_g1
TRINITY_DN48573_c0_g1
TRINITY_DN48560_c0_g1
TRINITY_DN48587_c2_g1
TRINITY_DN48559_c1_g1
TRINITY_DN48588_c0_g2
TRINITY_DN48588_c0_g1
TRINITY_DN48512_c0_g1
TRINITY_DN48594_c0_g1
TRINITY_DN48505_c0_g2
TRINITY_DN19784_c0_g1
TRINITY_DN14234_c0_g1
TRINITY_DN44316_c0_g1
TRINITY_DN44388_c0_g1
TRINITY_DN44386_c0_g1
TRINITY_DN44390_c0_g1
TRINITY_DN44324_c0_g1
TRINITY_DN44305_c0_g1
TRINITY_DN44344_c7_g1
TRINITY_DN44344_c8_g2
TRINITY_DN44328_c0_g1
TRINITY_DN44354_c0_g2
TRINITY_DN44303_c0_g3
TRINITY_DN44395_c0_g1
TRINITY_DN44331_c0_g1
TRINITY_DN51275_c0_g1
TRINITY_DN51235_c0_g1
TRINITY_DN51211_c0_g1
TRINITY_DN51226_c0_g2
TRINITY_DN51239_c2_g3
TRINITY_DN51266_c0_g2
TRINITY_DN51266_c0_g1
TRINITY_DN51220_c6_g2
TRINITY_DN51280_c0_g1
TRINITY_DN51278_c0_g1
TRINITY_DN51278_c1_g2
TRINITY_DN51278_c1_g1
TRINITY_DN51298_c1_g1
TRINITY_DN51244_c0_g1
TRINITY_DN51285_c0_g1
TRINITY_DN51245_c0_g1
TRINITY_DN51254_c0_g1
TRINITY_DN51293_c0_g1
TRINITY_DN51252_c0_g2
TRINITY_DN51258_c0_g1
TRINITY_DN51255_c0_g1
TRINITY_DN51265_c0_g2
TRINITY_DN38640_c0_g1
TRINITY_DN38622_c0_g1
TRINITY_DN38664_c0_g1
TRINITY_DN44872_c0_g1
TRINITY_DN44881_c0_g1
TRINITY_DN44861_c0_g1
TRINITY_DN44864_c0_g1
TRINITY_DN44876_c0_g1
TRINITY_DN44802_c0_g1
TRINITY_DN44854_c0_g1
TRINITY_DN44848_c0_g1
TRINITY_DN44868_c0_g1
TRINITY_DN44815_c0_g1
TRINITY_DN44879_c0_g2
TRINITY_DN44871_c0_g1
TRINITY_DN15480_c0_g1
TRINITY_DN47200_c1_g1
TRINITY_DN47274_c0_g2
TRINITY_DN47215_c0_g2
TRINITY_DN47215_c0_g3
TRINITY_DN47262_c0_g1
TRINITY_DN47249_c0_g1
TRINITY_DN47217_c0_g1
TRINITY_DN47288_c0_g2
TRINITY_DN47231_c0_g1
TRINITY_DN47235_c0_g2
TRINITY_DN47235_c0_g1
TRINITY_DN47251_c1_g1
TRINITY_DN47282_c0_g2
TRINITY_DN47224_c0_g1
TRINITY_DN47204_c0_g1
TRINITY_DN47260_c0_g1
TRINITY_DN78877_c0_g1
TRINITY_DN3963_c0_g1
TRINITY_DN3950_c0_g1
TRINITY_DN29672_c0_g1
TRINITY_DN42322_c0_g1
TRINITY_DN42334_c0_g1
TRINITY_DN42366_c0_g1
TRINITY_DN42320_c0_g1
TRINITY_DN42354_c0_g1
TRINITY_DN42392_c0_g1
TRINITY_DN42311_c0_g1
TRINITY_DN43149_c0_g1
TRINITY_DN43150_c0_g1
TRINITY_DN43150_c0_g2
TRINITY_DN43113_c0_g1
TRINITY_DN43116_c0_g1
TRINITY_DN43176_c0_g1
TRINITY_DN43139_c0_g1
TRINITY_DN43172_c0_g1
TRINITY_DN43165_c0_g1
TRINITY_DN43133_c0_g1
TRINITY_DN89683_c0_g1
TRINITY_DN97227_c0_g1
TRINITY_DN26277_c0_g1
TRINITY_DN26231_c0_g1
TRINITY_DN41166_c1_g1
TRINITY_DN41137_c0_g1
TRINITY_DN41124_c0_g1
TRINITY_DN41183_c0_g1
TRINITY_DN41151_c0_g1
TRINITY_DN41189_c2_g1
TRINITY_DN41110_c0_g1
TRINITY_DN41156_c1_g1
TRINITY_DN41123_c0_g2
TRINITY_DN42467_c0_g1
TRINITY_DN42457_c0_g1
TRINITY_DN42414_c0_g1
TRINITY_DN42417_c0_g1
TRINITY_DN42444_c0_g1
TRINITY_DN51947_c1_g1
TRINITY_DN51991_c0_g1
TRINITY_DN51933_c3_g2
TRINITY_DN51916_c1_g2
TRINITY_DN51910_c6_g1
TRINITY_DN51945_c0_g1
TRINITY_DN51960_c1_g1
TRINITY_DN51960_c4_g1
TRINITY_DN51958_c2_g1
TRINITY_DN51909_c2_g1
TRINITY_DN51956_c0_g1
TRINITY_DN51906_c0_g1
TRINITY_DN51999_c0_g1
TRINITY_DN51905_c0_g1
TRINITY_DN51996_c2_g2
TRINITY_DN51932_c3_g2
TRINITY_DN51979_c0_g3
TRINITY_DN51942_c4_g1
TRINITY_DN51978_c0_g2
TRINITY_DN51997_c0_g2
TRINITY_DN26413_c0_g1
TRINITY_DN26486_c0_g1
TRINITY_DN26470_c0_g1
TRINITY_DN51508_c1_g1
TRINITY_DN51578_c1_g1
TRINITY_DN51509_c0_g1
TRINITY_DN51531_c0_g2
TRINITY_DN51543_c0_g1
TRINITY_DN51566_c0_g1
TRINITY_DN51520_c1_g3
TRINITY_DN51505_c1_g1
TRINITY_DN51583_c1_g1
TRINITY_DN51547_c1_g1
TRINITY_DN51568_c0_g2
TRINITY_DN51592_c1_g1
TRINITY_DN51565_c1_g2
TRINITY_DN51542_c0_g2
TRINITY_DN51585_c0_g5
TRINITY_DN51585_c0_g1
TRINITY_DN51575_c2_g1
TRINITY_DN51551_c0_g1
TRINITY_DN51514_c1_g1
TRINITY_DN51573_c0_g1
TRINITY_DN51573_c1_g2
TRINITY_DN51573_c2_g1
TRINITY_DN51510_c1_g4
TRINITY_DN58176_c0_g1
TRINITY_DN58150_c0_g1
TRINITY_DN43656_c0_g2
TRINITY_DN43652_c0_g1
TRINITY_DN43653_c0_g1
TRINITY_DN43693_c0_g1
TRINITY_DN43634_c0_g1
TRINITY_DN43684_c0_g1
TRINITY_DN43663_c0_g1
TRINITY_DN43644_c0_g1
TRINITY_DN43605_c0_g1
TRINITY_DN42148_c0_g1
TRINITY_DN42115_c1_g1
TRINITY_DN42158_c0_g1
TRINITY_DN42173_c0_g1
TRINITY_DN42134_c0_g1
TRINITY_DN42186_c0_g2
TRINITY_DN42102_c0_g1
TRINITY_DN42141_c0_g1
TRINITY_DN42196_c0_g1
TRINITY_DN42182_c1_g1
TRINITY_DN20496_c0_g1
TRINITY_DN26321_c0_g1
TRINITY_DN26346_c0_g1
TRINITY_DN1164_c0_g1
TRINITY_DN53051_c0_g1
TRINITY_DN53009_c0_g1
TRINITY_DN69419_c0_g1
TRINITY_DN91034_c0_g1
TRINITY_DN91099_c0_g1
TRINITY_DN22392_c0_g1
TRINITY_DN44748_c0_g1
TRINITY_DN44713_c0_g1
TRINITY_DN44707_c0_g1
TRINITY_DN44746_c0_g1
TRINITY_DN44705_c0_g1
TRINITY_DN44789_c0_g1
TRINITY_DN44730_c0_g1
TRINITY_DN44785_c1_g1
TRINITY_DN44785_c1_g2
TRINITY_DN44778_c0_g1
TRINITY_DN39029_c0_g1
TRINITY_DN39018_c0_g1
TRINITY_DN39036_c0_g1
TRINITY_DN39092_c0_g1
TRINITY_DN39093_c0_g1
TRINITY_DN39038_c0_g1
TRINITY_DN33344_c0_g1
TRINITY_DN33332_c0_g2
TRINITY_DN33320_c0_g1
TRINITY_DN33374_c0_g1
TRINITY_DN45450_c0_g1
TRINITY_DN45461_c0_g1
TRINITY_DN45490_c0_g1
TRINITY_DN45477_c0_g1
TRINITY_DN45471_c1_g2
TRINITY_DN45434_c1_g2
TRINITY_DN45472_c0_g1
TRINITY_DN45413_c0_g1
TRINITY_DN45433_c0_g2
TRINITY_DN45452_c0_g1
TRINITY_DN40107_c0_g1
TRINITY_DN40144_c0_g1
TRINITY_DN40106_c0_g1
TRINITY_DN40127_c1_g2
TRINITY_DN40128_c0_g1
TRINITY_DN40141_c0_g1
TRINITY_DN40182_c1_g1
TRINITY_DN73997_c0_g1
TRINITY_DN32698_c0_g1
TRINITY_DN32696_c0_g1
TRINITY_DN32670_c0_g1
TRINITY_DN35570_c0_g1
TRINITY_DN35512_c0_g1
TRINITY_DN30683_c0_g1
TRINITY_DN30631_c0_g1
TRINITY_DN30670_c0_g1
TRINITY_DN44210_c0_g1
TRINITY_DN44228_c1_g1
TRINITY_DN44262_c0_g1
TRINITY_DN44204_c0_g1
TRINITY_DN44204_c5_g2
TRINITY_DN44278_c0_g1
TRINITY_DN44203_c0_g1
TRINITY_DN44286_c0_g1
TRINITY_DN44216_c1_g1
TRINITY_DN44297_c0_g1
TRINITY_DN44288_c0_g1
TRINITY_DN44220_c0_g3
TRINITY_DN44263_c2_g1
TRINITY_DN44231_c0_g1
TRINITY_DN45377_c0_g1
TRINITY_DN45331_c0_g1
TRINITY_DN45393_c0_g1
TRINITY_DN45327_c0_g1
TRINITY_DN45307_c0_g2
TRINITY_DN45350_c0_g1
TRINITY_DN45384_c0_g1
TRINITY_DN45328_c0_g1
TRINITY_DN45358_c0_g1
TRINITY_DN45316_c0_g1
TRINITY_DN45378_c0_g1
TRINITY_DN34894_c0_g2
TRINITY_DN34864_c0_g1
TRINITY_DN34869_c0_g1
TRINITY_DN59789_c0_g1
TRINITY_DN39308_c0_g1
TRINITY_DN39382_c1_g1
TRINITY_DN39368_c3_g1
TRINITY_DN39398_c0_g1
TRINITY_DN39333_c0_g1
TRINITY_DN34159_c0_g1
TRINITY_DN85073_c0_g1
TRINITY_DN20520_c0_g1
TRINITY_DN20560_c0_g1
TRINITY_DN20569_c0_g1
TRINITY_DN20571_c0_g1
TRINITY_DN20576_c0_g1
TRINITY_DN49789_c0_g1
TRINITY_DN49759_c1_g1
TRINITY_DN49767_c0_g1
TRINITY_DN49720_c0_g1
TRINITY_DN49794_c2_g2
TRINITY_DN49799_c0_g2
TRINITY_DN49775_c1_g1
TRINITY_DN49728_c0_g2
TRINITY_DN49730_c2_g5
TRINITY_DN49792_c2_g1
TRINITY_DN49792_c2_g2
TRINITY_DN49718_c2_g1
TRINITY_DN35376_c0_g1
TRINITY_DN35389_c0_g1
TRINITY_DN35346_c0_g1
TRINITY_DN30577_c0_g2
TRINITY_DN34935_c0_g1
TRINITY_DN34957_c0_g1
TRINITY_DN41461_c0_g1
TRINITY_DN41402_c0_g1
TRINITY_DN41402_c0_g2
TRINITY_DN41478_c0_g1
TRINITY_DN41476_c0_g1
TRINITY_DN41486_c0_g1
TRINITY_DN41445_c0_g1
TRINITY_DN41440_c0_g1
TRINITY_DN41480_c0_g1
TRINITY_DN41453_c0_g1
TRINITY_DN41426_c0_g1
TRINITY_DN45139_c0_g2
TRINITY_DN45153_c0_g2
TRINITY_DN45198_c1_g1
TRINITY_DN45116_c0_g1
TRINITY_DN45115_c1_g3
TRINITY_DN45101_c0_g1
TRINITY_DN45111_c0_g1
TRINITY_DN45150_c0_g2
TRINITY_DN45104_c0_g2
TRINITY_DN45104_c0_g3
TRINITY_DN45193_c2_g1
TRINITY_DN45188_c0_g1
TRINITY_DN45160_c0_g1
TRINITY_DN45194_c1_g2
TRINITY_DN45132_c1_g1
TRINITY_DN45190_c0_g1
TRINITY_DN77278_c0_g1
TRINITY_DN50284_c0_g1
TRINITY_DN50208_c1_g1
TRINITY_DN50236_c1_g1
TRINITY_DN50272_c0_g1
TRINITY_DN50277_c0_g2
TRINITY_DN50282_c1_g1
TRINITY_DN50241_c0_g1
TRINITY_DN50291_c0_g1
TRINITY_DN50231_c0_g1
TRINITY_DN50201_c0_g1
TRINITY_DN50233_c6_g1
TRINITY_DN50278_c0_g2
TRINITY_DN50283_c0_g1
TRINITY_DN28822_c0_g1
TRINITY_DN40503_c0_g2
TRINITY_DN40571_c1_g1
TRINITY_DN40545_c0_g1
TRINITY_DN40588_c0_g3
TRINITY_DN40534_c0_g2
TRINITY_DN40502_c0_g1
TRINITY_DN40528_c0_g1
TRINITY_DN23312_c0_g1
TRINITY_DN23399_c0_g1
TRINITY_DN30392_c0_g1
TRINITY_DN34455_c0_g1
TRINITY_DN34492_c0_g1
TRINITY_DN34481_c0_g1
TRINITY_DN33225_c0_g1
TRINITY_DN33204_c0_g1
TRINITY_DN33283_c0_g1
TRINITY_DN45876_c0_g1
TRINITY_DN45895_c0_g1
TRINITY_DN45807_c0_g2
TRINITY_DN45824_c0_g1
TRINITY_DN45865_c1_g1
TRINITY_DN45823_c0_g3
TRINITY_DN45858_c0_g1
TRINITY_DN45838_c0_g1
TRINITY_DN45890_c0_g2
TRINITY_DN45827_c0_g1
TRINITY_DN45846_c0_g1
TRINITY_DN45848_c0_g2
TRINITY_DN30170_c0_g1
TRINITY_DN30101_c0_g1
TRINITY_DN92402_c0_g1
TRINITY_DN47941_c0_g1
TRINITY_DN47965_c0_g1
TRINITY_DN47953_c0_g1
TRINITY_DN47974_c4_g1
TRINITY_DN47974_c4_g3
TRINITY_DN47974_c6_g1
TRINITY_DN47940_c0_g1
TRINITY_DN47947_c1_g1
TRINITY_DN47912_c0_g1
TRINITY_DN47987_c0_g1
TRINITY_DN47935_c3_g1
TRINITY_DN35129_c0_g1
TRINITY_DN23620_c0_g1
TRINITY_DN43542_c2_g2
TRINITY_DN43528_c1_g1
TRINITY_DN43543_c0_g1
TRINITY_DN43599_c0_g1
TRINITY_DN43582_c0_g1
TRINITY_DN43537_c0_g1
TRINITY_DN43594_c0_g1
TRINITY_DN43514_c0_g1
TRINITY_DN43536_c0_g1
TRINITY_DN43536_c1_g1
TRINITY_DN43563_c0_g1
TRINITY_DN43508_c0_g1
TRINITY_DN43538_c1_g1
TRINITY_DN35944_c0_g1
TRINITY_DN35990_c0_g2
TRINITY_DN97866_c0_g1
TRINITY_DN4209_c0_g1
TRINITY_DN7352_c0_g1
TRINITY_DN68019_c0_g1
TRINITY_DN46291_c0_g1
TRINITY_DN46257_c1_g1
TRINITY_DN46289_c1_g1
TRINITY_DN46263_c1_g1
TRINITY_DN46203_c0_g1
TRINITY_DN46285_c0_g1
TRINITY_DN46246_c0_g1
TRINITY_DN46232_c0_g1
TRINITY_DN46236_c3_g1
TRINITY_DN46236_c4_g1
TRINITY_DN46240_c1_g1
TRINITY_DN46241_c0_g1
TRINITY_DN46268_c1_g1
TRINITY_DN46268_c2_g1
TRINITY_DN6573_c0_g1
TRINITY_DN60396_c0_g1
TRINITY_DN50315_c0_g1
TRINITY_DN50333_c0_g1
TRINITY_DN50314_c4_g1
TRINITY_DN50334_c1_g1
TRINITY_DN50390_c0_g1
TRINITY_DN50316_c0_g1
TRINITY_DN50342_c0_g1
TRINITY_DN50342_c1_g1
TRINITY_DN50382_c0_g1
TRINITY_DN50329_c1_g1
TRINITY_DN50368_c0_g2
TRINITY_DN50304_c0_g1
TRINITY_DN50349_c0_g1
TRINITY_DN50302_c0_g1
TRINITY_DN50370_c1_g1
TRINITY_DN27105_c0_g1
TRINITY_DN25701_c0_g1
TRINITY_DN78207_c0_g1
TRINITY_DN52206_c0_g1
TRINITY_DN52252_c1_g1
TRINITY_DN52252_c1_g2
TRINITY_DN52230_c1_g1
TRINITY_DN52232_c7_g1
TRINITY_DN52241_c1_g1
TRINITY_DN52285_c2_g1
TRINITY_DN52212_c3_g1
TRINITY_DN52231_c3_g1
TRINITY_DN52240_c2_g1
TRINITY_DN52253_c3_g1
TRINITY_DN52200_c2_g3
TRINITY_DN52200_c3_g1
TRINITY_DN52278_c0_g1
TRINITY_DN52282_c1_g1
TRINITY_DN52238_c1_g2
TRINITY_DN39234_c0_g1
TRINITY_DN39216_c0_g1
TRINITY_DN39217_c0_g1
TRINITY_DN49916_c1_g2
TRINITY_DN49972_c0_g1
TRINITY_DN49966_c1_g1
TRINITY_DN49981_c0_g1
TRINITY_DN49945_c0_g1
TRINITY_DN49980_c0_g1
TRINITY_DN49995_c1_g5
TRINITY_DN49940_c0_g2
TRINITY_DN49921_c0_g1
TRINITY_DN49921_c1_g1
TRINITY_DN49921_c5_g1
TRINITY_DN49921_c5_g5
TRINITY_DN49928_c0_g1
TRINITY_DN31879_c0_g1
TRINITY_DN31855_c0_g1
TRINITY_DN87794_c0_g1
TRINITY_DN86977_c0_g1
TRINITY_DN51474_c0_g1
TRINITY_DN51494_c1_g1
TRINITY_DN51461_c2_g1
TRINITY_DN51423_c2_g1
TRINITY_DN51490_c0_g6
TRINITY_DN51489_c0_g1
TRINITY_DN51407_c0_g1
TRINITY_DN51480_c2_g1
TRINITY_DN51405_c0_g1
TRINITY_DN51405_c0_g2
TRINITY_DN51487_c0_g1
TRINITY_DN51475_c1_g1
TRINITY_DN51440_c0_g1
TRINITY_DN51448_c0_g1
TRINITY_DN51439_c0_g1
TRINITY_DN51447_c3_g1
TRINITY_DN51409_c3_g1
TRINITY_DN51428_c0_g1
TRINITY_DN49351_c3_g1
TRINITY_DN49351_c3_g2
TRINITY_DN49391_c0_g1
TRINITY_DN49356_c2_g1
TRINITY_DN49356_c3_g1
TRINITY_DN49333_c1_g2
TRINITY_DN49333_c1_g1
TRINITY_DN49349_c0_g1
TRINITY_DN49367_c2_g2
TRINITY_DN49367_c2_g1
TRINITY_DN49375_c1_g1
TRINITY_DN49371_c2_g4
TRINITY_DN49317_c0_g3
TRINITY_DN49310_c0_g1
TRINITY_DN49364_c2_g2
TRINITY_DN49373_c0_g2
TRINITY_DN19841_c0_g1
TRINITY_DN19819_c0_g1
TRINITY_DN8523_c0_g1
TRINITY_DN8576_c0_g1
TRINITY_DN19464_c0_g1
TRINITY_DN45517_c0_g1
TRINITY_DN45568_c0_g1
TRINITY_DN45569_c1_g1
TRINITY_DN45570_c1_g1
TRINITY_DN45519_c0_g1
TRINITY_DN45508_c0_g1
TRINITY_DN45583_c0_g1
TRINITY_DN45557_c0_g1
TRINITY_DN45564_c0_g1
TRINITY_DN45516_c1_g1
TRINITY_DN45516_c1_g2
TRINITY_DN45580_c0_g2
TRINITY_DN36147_c0_g1
TRINITY_DN36134_c0_g1
TRINITY_DN36141_c0_g1
TRINITY_DN36126_c0_g1
TRINITY_DN68941_c0_g1
TRINITY_DN52833_c0_g1
TRINITY_DN52821_c0_g1
TRINITY_DN40773_c0_g1
TRINITY_DN40729_c0_g1
TRINITY_DN40747_c0_g1
TRINITY_DN40764_c0_g1
TRINITY_DN40724_c0_g1
TRINITY_DN40794_c0_g2
TRINITY_DN40738_c0_g1
TRINITY_DN40757_c1_g2
TRINITY_DN40736_c0_g1
TRINITY_DN40737_c0_g2
TRINITY_DN51046_c1_g1
TRINITY_DN51080_c1_g2
TRINITY_DN51027_c0_g1
TRINITY_DN51009_c4_g1
TRINITY_DN51094_c0_g1
TRINITY_DN51042_c0_g1
TRINITY_DN51058_c0_g2
TRINITY_DN51006_c2_g1
TRINITY_DN51029_c1_g1
TRINITY_DN51070_c0_g1
TRINITY_DN51093_c0_g1
TRINITY_DN51093_c0_g3
TRINITY_DN51071_c0_g1
TRINITY_DN51062_c3_g1
TRINITY_DN51057_c0_g1
TRINITY_DN49568_c4_g1
TRINITY_DN49568_c7_g1
TRINITY_DN49537_c1_g1
TRINITY_DN49507_c1_g1
TRINITY_DN49507_c1_g2
TRINITY_DN49517_c0_g1
TRINITY_DN49522_c3_g1
TRINITY_DN49504_c1_g1
TRINITY_DN49512_c2_g1
TRINITY_DN49540_c1_g1
TRINITY_DN49579_c1_g1
TRINITY_DN49570_c0_g1
TRINITY_DN49548_c0_g1
TRINITY_DN49548_c0_g2
TRINITY_DN49529_c0_g2
TRINITY_DN49558_c0_g1
TRINITY_DN49569_c1_g1
TRINITY_DN94310_c0_g1
TRINITY_DN9855_c0_g1
TRINITY_DN9894_c0_g1
TRINITY_DN52167_c1_g1
TRINITY_DN52167_c1_g3
TRINITY_DN52132_c3_g1
TRINITY_DN52185_c2_g1
TRINITY_DN52154_c1_g1
TRINITY_DN52154_c2_g2
TRINITY_DN52113_c0_g2
TRINITY_DN52169_c0_g1
TRINITY_DN52193_c0_g2
TRINITY_DN52122_c0_g1
TRINITY_DN52104_c0_g1
TRINITY_DN52125_c0_g1
TRINITY_DN52141_c2_g1
TRINITY_DN52140_c2_g1
TRINITY_DN52170_c0_g1
TRINITY_DN52170_c1_g2
TRINITY_DN52102_c2_g1
TRINITY_DN52114_c2_g1
TRINITY_DN48822_c1_g1
TRINITY_DN48862_c0_g1
TRINITY_DN48894_c0_g1
TRINITY_DN48803_c1_g1
TRINITY_DN48852_c0_g1
TRINITY_DN48848_c0_g1
TRINITY_DN48837_c0_g1
TRINITY_DN48808_c2_g1
TRINITY_DN48849_c0_g2
TRINITY_DN48880_c0_g1
TRINITY_DN48809_c0_g1
TRINITY_DN48869_c0_g1
TRINITY_DN58026_c0_g1
TRINITY_DN51310_c0_g1
TRINITY_DN51368_c1_g1
TRINITY_DN51362_c0_g1
TRINITY_DN51341_c1_g1
TRINITY_DN51386_c0_g1
TRINITY_DN51349_c0_g1
TRINITY_DN51350_c1_g1
TRINITY_DN51382_c1_g1
TRINITY_DN51304_c0_g1
TRINITY_DN51315_c3_g1
TRINITY_DN51395_c0_g1
TRINITY_DN51300_c4_g10
TRINITY_DN51335_c0_g1
TRINITY_DN51377_c1_g1
TRINITY_DN51358_c1_g1
TRINITY_DN44470_c0_g1
TRINITY_DN44474_c0_g1
TRINITY_DN44449_c0_g1
TRINITY_DN44409_c0_g2
TRINITY_DN44442_c0_g1
TRINITY_DN44487_c0_g1
TRINITY_DN44484_c1_g2
TRINITY_DN44492_c0_g1
TRINITY_DN44473_c0_g1
TRINITY_DN44477_c0_g1
TRINITY_DN44405_c0_g1
TRINITY_DN44434_c0_g2
TRINITY_DN44401_c1_g1
TRINITY_DN85936_c0_g1
TRINITY_DN63839_c0_g1
TRINITY_DN50039_c2_g1
TRINITY_DN50063_c0_g1
TRINITY_DN50004_c1_g1
TRINITY_DN50098_c0_g1
TRINITY_DN50057_c0_g1
TRINITY_DN50093_c1_g2
TRINITY_DN50044_c0_g1
TRINITY_DN50019_c0_g1
TRINITY_DN50006_c1_g1
TRINITY_DN50006_c1_g3
TRINITY_DN50016_c0_g1
TRINITY_DN50027_c0_g2
TRINITY_DN50051_c0_g1
TRINITY_DN50033_c0_g1
TRINITY_DN50058_c1_g1
TRINITY_DN50026_c0_g1
TRINITY_DN50020_c4_g1
TRINITY_DN50008_c2_g1
TRINITY_DN21496_c0_g1
TRINITY_DN10036_c0_g1
TRINITY_DN50123_c1_g3
TRINITY_DN50123_c1_g2
TRINITY_DN50134_c0_g1
TRINITY_DN50130_c1_g1
TRINITY_DN50197_c0_g2
TRINITY_DN50150_c0_g1
TRINITY_DN50120_c1_g4
TRINITY_DN50120_c1_g1
TRINITY_DN50120_c1_g2
TRINITY_DN50109_c1_g1
TRINITY_DN50186_c0_g1
TRINITY_DN50151_c0_g1
TRINITY_DN50129_c2_g1
TRINITY_DN50100_c1_g1
TRINITY_DN50141_c2_g1
TRINITY_DN50180_c0_g1
TRINITY_DN50104_c1_g1
TRINITY_DN50199_c2_g6
TRINITY_DN48691_c0_g2
TRINITY_DN48644_c0_g1
TRINITY_DN48683_c0_g1
TRINITY_DN48682_c0_g1
TRINITY_DN48668_c0_g1
TRINITY_DN48674_c0_g1
TRINITY_DN48619_c0_g3
TRINITY_DN48617_c0_g1
TRINITY_DN48659_c0_g1
TRINITY_DN48698_c1_g1
TRINITY_DN48625_c1_g1
TRINITY_DN48625_c1_g4
TRINITY_DN72396_c0_g1
TRINITY_DN35061_c0_g1
TRINITY_DN35090_c0_g1
TRINITY_DN35054_c0_g1
TRINITY_DN37580_c0_g1
TRINITY_DN37575_c0_g1
TRINITY_DN37537_c0_g1
TRINITY_DN46758_c0_g1
TRINITY_DN46772_c1_g1
TRINITY_DN46764_c0_g1
TRINITY_DN46716_c2_g1
TRINITY_DN46717_c0_g1
TRINITY_DN46755_c0_g1
TRINITY_DN46747_c0_g1
TRINITY_DN46797_c0_g1
TRINITY_DN46733_c0_g2
TRINITY_DN46746_c0_g2
TRINITY_DN46789_c0_g1
TRINITY_DN46785_c0_g1
TRINITY_DN42089_c0_g1
TRINITY_DN42002_c0_g1
TRINITY_DN42014_c0_g1
TRINITY_DN42049_c0_g1
TRINITY_DN42044_c0_g1
TRINITY_DN42060_c0_g2
TRINITY_DN42090_c1_g1
TRINITY_DN42036_c0_g1
TRINITY_DN42096_c0_g1
TRINITY_DN42822_c0_g1
TRINITY_DN42831_c0_g1
TRINITY_DN42856_c0_g1
TRINITY_DN42880_c0_g1
TRINITY_DN42843_c2_g1
TRINITY_DN42835_c0_g1
TRINITY_DN42853_c0_g1
TRINITY_DN42863_c0_g1
TRINITY_DN42854_c1_g1
TRINITY_DN42859_c0_g1
TRINITY_DN42806_c0_g1
TRINITY_DN74724_c0_g1
TRINITY_DN58888_c0_g1
TRINITY_DN1047_c0_g1
TRINITY_DN26141_c0_g1
TRINITY_DN49016_c2_g1
TRINITY_DN49071_c0_g1
TRINITY_DN49092_c2_g2
TRINITY_DN49092_c2_g1
TRINITY_DN49092_c2_g4
TRINITY_DN49031_c0_g2
TRINITY_DN49002_c2_g1
TRINITY_DN49056_c0_g1
TRINITY_DN49053_c0_g1
TRINITY_DN49064_c1_g1
TRINITY_DN49042_c0_g1
TRINITY_DN49091_c0_g1
TRINITY_DN49025_c0_g1
TRINITY_DN49082_c1_g1
TRINITY_DN49052_c0_g2
TRINITY_DN49076_c1_g2
TRINITY_DN49014_c1_g2
TRINITY_DN49014_c1_g1
TRINITY_DN49049_c4_g1
TRINITY_DN49047_c1_g3
TRINITY_DN49093_c0_g1
TRINITY_DN49046_c3_g1
TRINITY_DN32306_c0_g1
TRINITY_DN512_c0_g1
TRINITY_DN37035_c0_g1
TRINITY_DN37073_c0_g1
TRINITY_DN37052_c0_g1
TRINITY_DN37060_c0_g1
TRINITY_DN89964_c0_g1
TRINITY_DN32493_c0_g1
TRINITY_DN32415_c0_g1
TRINITY_DN32479_c0_g1
TRINITY_DN32442_c0_g1
TRINITY_DN32434_c0_g1
TRINITY_DN32419_c0_g1
TRINITY_DN37638_c1_g1
TRINITY_DN37620_c0_g1
TRINITY_DN37623_c0_g2
TRINITY_DN37642_c0_g2
TRINITY_DN37631_c0_g2
TRINITY_DN41796_c0_g1
TRINITY_DN41747_c0_g1
TRINITY_DN41795_c0_g1
TRINITY_DN41762_c0_g1
TRINITY_DN41750_c0_g1
TRINITY_DN36972_c0_g1
TRINITY_DN36977_c0_g1
TRINITY_DN29329_c0_g1
TRINITY_DN46617_c0_g1
TRINITY_DN46622_c0_g1
TRINITY_DN46630_c0_g2
TRINITY_DN46657_c0_g1
TRINITY_DN46635_c1_g2
TRINITY_DN46685_c0_g1
TRINITY_DN46675_c0_g1
TRINITY_DN46621_c0_g1
TRINITY_DN46695_c1_g1
TRINITY_DN46604_c2_g1
TRINITY_DN46625_c0_g2
TRINITY_DN46620_c0_g1
TRINITY_DN46648_c2_g1
TRINITY_DN46686_c0_g3
TRINITY_DN2184_c0_g1
TRINITY_DN2110_c0_g1
TRINITY_DN36423_c0_g1
TRINITY_DN45715_c0_g1
TRINITY_DN45718_c0_g1
TRINITY_DN45736_c0_g1
TRINITY_DN45713_c0_g1
TRINITY_DN45755_c0_g1
TRINITY_DN45784_c0_g1
TRINITY_DN45702_c2_g1
TRINITY_DN45766_c1_g1
TRINITY_DN45756_c0_g1
TRINITY_DN45773_c1_g1
TRINITY_DN45790_c1_g1
TRINITY_DN33404_c0_g1
TRINITY_DN33425_c0_g1
TRINITY_DN33405_c0_g1
TRINITY_DN15557_c0_g1
TRINITY_DN24038_c0_g1
TRINITY_DN41681_c0_g1
TRINITY_DN41698_c0_g2
TRINITY_DN41606_c0_g1
TRINITY_DN41665_c0_g1
TRINITY_DN41628_c0_g1
TRINITY_DN41611_c0_g1
TRINITY_DN41690_c0_g2
TRINITY_DN49487_c0_g1
TRINITY_DN49454_c0_g1
TRINITY_DN49460_c1_g1
TRINITY_DN49408_c2_g1
TRINITY_DN49434_c0_g1
TRINITY_DN49493_c0_g1
TRINITY_DN49498_c0_g1
TRINITY_DN49409_c5_g1
TRINITY_DN49464_c1_g1
TRINITY_DN49462_c0_g2
TRINITY_DN49468_c1_g1
TRINITY_DN49470_c0_g1
TRINITY_DN49415_c0_g1
TRINITY_DN49423_c0_g1
TRINITY_DN31618_c0_g1
TRINITY_DN31694_c0_g1
TRINITY_DN31608_c0_g1
TRINITY_DN30242_c0_g1
TRINITY_DN30247_c0_g1
TRINITY_DN41278_c0_g1
TRINITY_DN41230_c0_g1
TRINITY_DN41226_c0_g1
TRINITY_DN41236_c0_g1
TRINITY_DN41286_c0_g1
TRINITY_DN41250_c0_g1
TRINITY_DN41262_c0_g1
TRINITY_DN37404_c0_g1
TRINITY_DN37414_c0_g1
TRINITY_DN345_c0_g1
TRINITY_DN59273_c0_g1
TRINITY_DN2295_c0_g1
TRINITY_DN101294_c0_g1
TRINITY_DN100886_c0_g1
TRINITY_DN46367_c0_g1
TRINITY_DN46328_c0_g1
TRINITY_DN46379_c0_g1
TRINITY_DN46323_c0_g2
TRINITY_DN46369_c0_g1
TRINITY_DN46314_c0_g1
TRINITY_DN46381_c0_g1
TRINITY_DN28630_c0_g1
TRINITY_DN28662_c0_g1
TRINITY_DN38063_c0_g1
TRINITY_DN38008_c0_g1
TRINITY_DN38085_c0_g1
TRINITY_DN38019_c0_g1
TRINITY_DN84825_c0_g1
TRINITY_DN34200_c0_g1
TRINITY_DN34242_c0_g1
TRINITY_DN36573_c0_g1
TRINITY_DN36860_c0_g1
TRINITY_DN36810_c0_g1
TRINITY_DN36858_c0_g1
TRINITY_DN44503_c0_g1
TRINITY_DN44553_c0_g1
TRINITY_DN44574_c0_g1
TRINITY_DN44511_c2_g1
TRINITY_DN44543_c2_g2
TRINITY_DN44521_c0_g1
TRINITY_DN44534_c0_g1
TRINITY_DN44510_c0_g2
TRINITY_DN44578_c0_g1
TRINITY_DN44591_c0_g4
TRINITY_DN44522_c0_g1
TRINITY_DN47040_c0_g1
TRINITY_DN47024_c0_g1
TRINITY_DN47085_c0_g1
TRINITY_DN47037_c0_g1
TRINITY_DN47079_c0_g1
TRINITY_DN47052_c0_g1
TRINITY_DN47067_c1_g1
TRINITY_DN47004_c0_g1
TRINITY_DN47092_c2_g1
TRINITY_DN47019_c0_g2
TRINITY_DN47094_c0_g1
TRINITY_DN47018_c2_g1
TRINITY_DN47036_c0_g1
TRINITY_DN47086_c1_g1
TRINITY_DN47086_c1_g2
TRINITY_DN47090_c2_g1
TRINITY_DN47075_c0_g1
TRINITY_DN47027_c0_g1
TRINITY_DN47072_c0_g1
TRINITY_DN39781_c0_g1
TRINITY_DN39733_c0_g1
TRINITY_DN39759_c0_g1
TRINITY_DN39761_c0_g1
TRINITY_DN94656_c0_g1
TRINITY_DN7286_c0_g1
TRINITY_DN43226_c0_g1
TRINITY_DN43239_c0_g1
TRINITY_DN43224_c0_g1
TRINITY_DN43267_c0_g1
TRINITY_DN43257_c0_g1
TRINITY_DN43248_c0_g1
TRINITY_DN43217_c1_g1
TRINITY_DN43255_c0_g1
TRINITY_DN43258_c0_g1
TRINITY_DN43282_c0_g1
TRINITY_DN59_c0_g1
TRINITY_DN46047_c0_g1
TRINITY_DN46082_c0_g1
TRINITY_DN46096_c0_g2
TRINITY_DN46092_c0_g1
TRINITY_DN46077_c1_g1
TRINITY_DN46056_c1_g1
TRINITY_DN46037_c1_g1
TRINITY_DN46035_c0_g1
TRINITY_DN46034_c0_g1
TRINITY_DN46054_c0_g1
TRINITY_DN46072_c0_g1
TRINITY_DN29728_c0_g1
TRINITY_DN71941_c0_g1
TRINITY_DN29207_c0_g1
TRINITY_DN17136_c0_g1
TRINITY_DN93507_c0_g1
TRINITY_DN40821_c0_g1
TRINITY_DN40898_c0_g1
TRINITY_DN40835_c0_g1
TRINITY_DN40833_c0_g1
TRINITY_DN40893_c0_g1
TRINITY_DN40878_c0_g1
TRINITY_DN58574_c0_g1
TRINITY_DN69341_c0_g1
TRINITY_DN69386_c0_g1
TRINITY_DN38251_c0_g1
TRINITY_DN38239_c0_g1
TRINITY_DN38271_c0_g1
TRINITY_DN38233_c0_g1
TRINITY_DN38242_c0_g1
TRINITY_DN38211_c0_g1
TRINITY_DN38260_c0_g1
TRINITY_DN38220_c0_g1
TRINITY_DN34340_c0_g1
TRINITY_DN1566_c0_g1
TRINITY_DN38392_c1_g1
TRINITY_DN38330_c0_g1
TRINITY_DN38315_c0_g1
TRINITY_DN38320_c0_g1
TRINITY_DN27794_c0_g1
TRINITY_DN94411_c0_g1
TRINITY_DN58772_c0_g1
TRINITY_DN40446_c0_g1
TRINITY_DN40481_c0_g1
TRINITY_DN40424_c0_g1
TRINITY_DN40453_c0_g1
TRINITY_DN40470_c1_g1
TRINITY_DN40487_c0_g1
TRINITY_DN40471_c1_g1
TRINITY_DN40440_c0_g1
TRINITY_DN40427_c0_g1
TRINITY_DN89006_c0_g1
TRINITY_DN28307_c0_g1
TRINITY_DN48292_c3_g1
TRINITY_DN48292_c4_g1
TRINITY_DN48267_c0_g1
TRINITY_DN48221_c0_g1
TRINITY_DN48269_c0_g1
TRINITY_DN48278_c1_g1
TRINITY_DN48225_c0_g1
TRINITY_DN48212_c0_g1
TRINITY_DN48242_c0_g3
TRINITY_DN48242_c0_g2
TRINITY_DN48207_c0_g1
TRINITY_DN48265_c0_g1
TRINITY_DN48276_c0_g2
TRINITY_DN48276_c0_g1
TRINITY_DN48234_c0_g1
TRINITY_DN48296_c0_g1
TRINITY_DN48226_c0_g1
TRINITY_DN48245_c0_g1
TRINITY_DN48209_c0_g2
TRINITY_DN40370_c0_g1
TRINITY_DN40390_c0_g1
TRINITY_DN40386_c0_g1
TRINITY_DN40307_c0_g2
TRINITY_DN40364_c0_g2
TRINITY_DN40375_c0_g1
TRINITY_DN40362_c0_g1
TRINITY_DN53547_c0_g1
TRINITY_DN50632_c1_g1
TRINITY_DN50664_c0_g1
TRINITY_DN50604_c0_g3
TRINITY_DN50604_c0_g1
TRINITY_DN50691_c0_g1
TRINITY_DN50637_c2_g1
TRINITY_DN50637_c2_g2
TRINITY_DN50640_c0_g1
TRINITY_DN50695_c0_g2
TRINITY_DN50688_c2_g1
TRINITY_DN50621_c3_g1
TRINITY_DN50652_c0_g1
TRINITY_DN50641_c0_g1
TRINITY_DN50644_c0_g1
TRINITY_DN50600_c0_g1
TRINITY_DN50698_c0_g1
TRINITY_DN50687_c3_g4
TRINITY_DN50661_c1_g1
TRINITY_DN43065_c0_g2
TRINITY_DN43003_c0_g1
TRINITY_DN43018_c0_g1
TRINITY_DN43008_c0_g1
TRINITY_DN43019_c0_g1
TRINITY_DN43047_c0_g1
TRINITY_DN43072_c0_g1
TRINITY_DN43015_c0_g2
TRINITY_DN43001_c0_g1
TRINITY_DN43038_c0_g1
TRINITY_DN43010_c0_g1
TRINITY_DN43039_c0_g3
TRINITY_DN43049_c0_g1
TRINITY_DN23122_c0_g1
TRINITY_DN6919_c0_g1
TRINITY_DN6980_c0_g1
TRINITY_DN6970_c0_g1
TRINITY_DN46429_c1_g1
TRINITY_DN46445_c0_g1
TRINITY_DN46428_c0_g2
TRINITY_DN46407_c0_g1
TRINITY_DN46419_c0_g1
TRINITY_DN46481_c0_g2
TRINITY_DN46409_c0_g1
TRINITY_DN46430_c0_g1
TRINITY_DN46414_c0_g1
TRINITY_DN46410_c0_g1
TRINITY_DN46420_c1_g1
TRINITY_DN46434_c1_g1
TRINITY_DN46438_c0_g1
TRINITY_DN46460_c0_g1
TRINITY_DN46482_c2_g2
TRINITY_DN45666_c0_g1
TRINITY_DN45688_c1_g1
TRINITY_DN45648_c0_g1
TRINITY_DN45652_c0_g1
TRINITY_DN45656_c0_g2
TRINITY_DN45616_c1_g1
TRINITY_DN45660_c0_g1
TRINITY_DN45634_c1_g1
TRINITY_DN45607_c0_g1
TRINITY_DN45632_c0_g1
TRINITY_DN45630_c0_g1
TRINITY_DN45613_c0_g1
TRINITY_DN45622_c0_g1
TRINITY_DN45665_c0_g1
TRINITY_DN45699_c0_g1
TRINITY_DN45663_c0_g1
TRINITY_DN38836_c0_g1
TRINITY_DN38845_c0_g1
TRINITY_DN38858_c0_g1
TRINITY_DN38890_c0_g4
TRINITY_DN5011_c0_g1
TRINITY_DN97632_c0_g1
TRINITY_DN14537_c0_g1
TRINITY_DN48075_c0_g1
TRINITY_DN48049_c0_g1
TRINITY_DN48029_c0_g1
TRINITY_DN48078_c0_g1
TRINITY_DN48032_c0_g1
TRINITY_DN48093_c1_g1
TRINITY_DN48087_c0_g1
TRINITY_DN48023_c1_g2
TRINITY_DN48079_c0_g1
TRINITY_DN48034_c0_g1
TRINITY_DN48074_c1_g1
TRINITY_DN48030_c3_g2
TRINITY_DN48069_c0_g1
TRINITY_DN48085_c0_g1
TRINITY_DN48050_c0_g1
TRINITY_DN46999_c0_g1
TRINITY_DN46910_c0_g1
TRINITY_DN46962_c0_g1
TRINITY_DN46995_c0_g1
TRINITY_DN46906_c6_g2
TRINITY_DN46992_c0_g1
TRINITY_DN46948_c0_g1
TRINITY_DN46965_c0_g1
TRINITY_DN46922_c1_g1
TRINITY_DN46988_c0_g2
TRINITY_DN46943_c0_g5
TRINITY_DN46941_c0_g1
TRINITY_DN46946_c0_g1
TRINITY_DN46946_c0_g2
TRINITY_DN47403_c1_g2
TRINITY_DN47418_c0_g1
TRINITY_DN47418_c0_g2
TRINITY_DN47469_c0_g1
TRINITY_DN47423_c1_g1
TRINITY_DN47485_c1_g4
TRINITY_DN47485_c1_g1
TRINITY_DN47420_c0_g1
TRINITY_DN47445_c2_g1
TRINITY_DN47453_c0_g1
TRINITY_DN47431_c0_g1
TRINITY_DN47467_c0_g1
TRINITY_DN47424_c0_g1
TRINITY_DN47487_c0_g1
TRINITY_DN47456_c0_g1
TRINITY_DN47446_c0_g1
TRINITY_DN47430_c0_g1
TRINITY_DN47472_c0_g1
TRINITY_DN47404_c0_g1
TRINITY_DN33534_c0_g1
TRINITY_DN56562_c0_g1
TRINITY_DN50872_c0_g1
TRINITY_DN50864_c4_g1
TRINITY_DN50858_c1_g2
TRINITY_DN50858_c1_g1
TRINITY_DN50874_c1_g1
TRINITY_DN50883_c0_g1
TRINITY_DN50876_c0_g2
TRINITY_DN50898_c1_g1
TRINITY_DN50850_c3_g1
TRINITY_DN50815_c0_g1
TRINITY_DN32809_c0_g2
TRINITY_DN32867_c0_g1
TRINITY_DN41811_c0_g1
TRINITY_DN41867_c0_g1
TRINITY_DN41863_c0_g1
TRINITY_DN41887_c0_g1
TRINITY_DN41875_c0_g1
TRINITY_DN41856_c0_g1
TRINITY_DN41806_c0_g2
TRINITY_DN41801_c0_g1
TRINITY_DN42752_c0_g1
TRINITY_DN42732_c0_g1
TRINITY_DN42757_c0_g1
TRINITY_DN42753_c0_g1
TRINITY_DN42775_c0_g1
TRINITY_DN42708_c0_g1
TRINITY_DN42715_c0_g1
TRINITY_DN26953_c0_g1
TRINITY_DN51160_c0_g2
TRINITY_DN51169_c2_g1
TRINITY_DN51114_c4_g1
TRINITY_DN51185_c0_g1
TRINITY_DN51134_c1_g1
TRINITY_DN51198_c3_g1
TRINITY_DN51184_c0_g1
TRINITY_DN51164_c0_g1
TRINITY_DN51127_c0_g1
TRINITY_DN51126_c3_g1
TRINITY_DN51172_c0_g1
TRINITY_DN51152_c0_g1
TRINITY_DN51136_c1_g1
TRINITY_DN51136_c2_g1
TRINITY_DN51106_c6_g2
TRINITY_DN51181_c2_g1
TRINITY_DN51191_c1_g2
TRINITY_DN51101_c0_g1
TRINITY_DN51188_c1_g1
TRINITY_DN51178_c0_g1
TRINITY_DN40625_c0_g1
TRINITY_DN40616_c0_g1
TRINITY_DN40668_c0_g1
TRINITY_DN40682_c0_g1
TRINITY_DN40662_c0_g1
TRINITY_DN40630_c0_g1
TRINITY_DN40676_c0_g1
TRINITY_DN40622_c0_g1
TRINITY_DN40641_c0_g1
TRINITY_DN40692_c0_g2
TRINITY_DN1728_c0_g1
TRINITY_DN41978_c0_g1
TRINITY_DN41985_c0_g1
TRINITY_DN41963_c0_g1
TRINITY_DN41994_c0_g2
TRINITY_DN41922_c0_g1
TRINITY_DN41940_c0_g1
TRINITY_DN41956_c0_g2
TRINITY_DN41911_c0_g1
TRINITY_DN41981_c0_g1
TRINITY_DN38181_c0_g1
TRINITY_DN38105_c0_g1
TRINITY_DN38128_c0_g1
TRINITY_DN38108_c0_g1
TRINITY_DN38135_c0_g1
TRINITY_DN38126_c1_g1
TRINITY_DN38154_c0_g1
TRINITY_DN38155_c0_g2
TRINITY_DN94846_c0_g1
TRINITY_DN43759_c0_g1
TRINITY_DN43713_c0_g1
TRINITY_DN43791_c0_g1
TRINITY_DN43773_c0_g1
TRINITY_DN43743_c0_g1
TRINITY_DN43756_c1_g1
TRINITY_DN43754_c0_g1
TRINITY_DN43757_c0_g1
TRINITY_DN43758_c1_g1
TRINITY_DN43710_c0_g1
TRINITY_DN43776_c0_g1
TRINITY_DN28002_c0_g1
TRINITY_DN28066_c0_g1
TRINITY_DN28069_c0_g1
TRINITY_DN55072_c0_g1
TRINITY_DN39193_c0_g1
TRINITY_DN39159_c0_g1
TRINITY_DN39199_c0_g1
TRINITY_DN39158_c0_g1
TRINITY_DN39161_c0_g1
TRINITY_DN39143_c0_g1
TRINITY_DN39185_c0_g1
TRINITY_DN39160_c0_g1
TRINITY_DN38946_c0_g1
TRINITY_DN38943_c0_g1
TRINITY_DN38919_c0_g1
TRINITY_DN38913_c0_g1
TRINITY_DN38954_c0_g1
TRINITY_DN38936_c0_g1
TRINITY_DN44147_c0_g1
TRINITY_DN44179_c0_g1
TRINITY_DN44124_c0_g1
TRINITY_DN44102_c0_g2
TRINITY_DN44153_c0_g2
TRINITY_DN44153_c0_g1
TRINITY_DN44142_c0_g1
TRINITY_DN44165_c0_g1
TRINITY_DN44165_c0_g2
TRINITY_DN44181_c0_g1
TRINITY_DN44156_c0_g3
TRINITY_DN44177_c0_g1
TRINITY_DN44173_c0_g1
TRINITY_DN44163_c0_g1
TRINITY_DN44159_c0_g1
TRINITY_DN67664_c0_g1
TRINITY_DN42525_c0_g1
TRINITY_DN42585_c0_g1
TRINITY_DN42579_c0_g1
TRINITY_DN42557_c0_g1
TRINITY_DN42534_c0_g1
TRINITY_DN42597_c0_g1
TRINITY_DN42566_c0_g1
TRINITY_DN42554_c0_g1
TRINITY_DN39833_c0_g1
TRINITY_DN39846_c0_g1
TRINITY_DN39886_c0_g1
TRINITY_DN39892_c0_g1
TRINITY_DN39822_c0_g1
TRINITY_DN51884_c1_g1
TRINITY_DN51873_c2_g3
TRINITY_DN51873_c2_g5
TRINITY_DN51831_c2_g1
TRINITY_DN51876_c2_g1
TRINITY_DN51854_c0_g1
TRINITY_DN51824_c4_g2
TRINITY_DN51815_c4_g1
TRINITY_DN51815_c5_g2
TRINITY_DN51875_c1_g1
TRINITY_DN51829_c0_g1
TRINITY_DN51864_c0_g1
TRINITY_DN51813_c2_g2
TRINITY_DN51813_c2_g3
TRINITY_DN51868_c0_g1
TRINITY_DN51874_c3_g1
TRINITY_DN51820_c0_g1
TRINITY_DN51821_c0_g1
TRINITY_DN51821_c1_g1
TRINITY_DN34672_c0_g1
TRINITY_DN41568_c0_g1
TRINITY_DN41511_c0_g1
TRINITY_DN41555_c0_g1
TRINITY_DN41517_c0_g1
TRINITY_DN41535_c0_g1
TRINITY_DN41544_c0_g1
TRINITY_DN41582_c0_g1
TRINITY_DN11679_c0_g1
TRINITY_DN6422_c0_g1
TRINITY_DN40253_c0_g1
TRINITY_DN40258_c0_g1
TRINITY_DN40277_c0_g1
TRINITY_DN40207_c0_g1
TRINITY_DN40221_c0_g1
TRINITY_DN47137_c1_g2
TRINITY_DN47195_c0_g2
TRINITY_DN47175_c0_g1
TRINITY_DN47176_c0_g1
TRINITY_DN47166_c1_g1
TRINITY_DN47109_c0_g3
TRINITY_DN47109_c0_g4
TRINITY_DN47165_c0_g2
TRINITY_DN47178_c1_g1
TRINITY_DN47191_c0_g1
TRINITY_DN47162_c0_g1
TRINITY_DN47110_c1_g1
TRINITY_DN47148_c0_g1
TRINITY_DN47130_c1_g1
TRINITY_DN10240_c0_g1
TRINITY_DN76722_c0_g1
TRINITY_DN38742_c0_g1
TRINITY_DN38735_c0_g1
TRINITY_DN38788_c0_g1
TRINITY_DN38705_c0_g1
TRINITY_DN38751_c0_g1
TRINITY_DN38745_c0_g1
TRINITY_DN49214_c1_g1
TRINITY_DN49236_c0_g1
TRINITY_DN49274_c0_g1
TRINITY_DN49204_c0_g1
TRINITY_DN49212_c2_g1
TRINITY_DN49291_c2_g3
TRINITY_DN49241_c0_g1
TRINITY_DN49241_c0_g2
TRINITY_DN49284_c0_g1
TRINITY_DN49254_c0_g1
TRINITY_DN49224_c0_g1
TRINITY_DN49253_c0_g2
TRINITY_DN49296_c0_g1
TRINITY_DN49248_c0_g1
TRINITY_DN49219_c1_g1
TRINITY_DN49228_c1_g2
TRINITY_DN49272_c3_g1
TRINITY_DN49292_c0_g1
TRINITY_DN49201_c0_g1
TRINITY_DN49289_c0_g1
TRINITY_DN49206_c4_g1
TRINITY_DN60179_c0_g1
TRINITY_DN46153_c0_g1
TRINITY_DN46101_c2_g2
TRINITY_DN46191_c0_g1
TRINITY_DN46173_c0_g1
TRINITY_DN46119_c0_g2
TRINITY_DN46168_c0_g1
TRINITY_DN46186_c2_g1
TRINITY_DN46180_c0_g3
TRINITY_DN46140_c0_g1
TRINITY_DN46182_c0_g1
TRINITY_DN18344_c0_g1
TRINITY_DN71314_c0_g1
TRINITY_DN28744_c0_g1
TRINITY_DN28723_c0_g1
TRINITY_DN73594_c0_g1
TRINITY_DN59538_c0_g1
TRINITY_DN42202_c0_g2
TRINITY_DN42276_c1_g1
TRINITY_DN42248_c0_g1
TRINITY_DN42238_c0_g1
TRINITY_DN42256_c0_g1
TRINITY_DN42294_c0_g2
TRINITY_DN42288_c0_g1
TRINITY_DN42255_c0_g1
TRINITY_DN42278_c0_g1
TRINITY_DN25295_c0_g1
TRINITY_DN2548_c0_g1
TRINITY_DN35400_c0_g1
TRINITY_DN35422_c0_g1
TRINITY_DN35446_c0_g1
TRINITY_DN45945_c1_g1
TRINITY_DN45980_c1_g1
TRINITY_DN45955_c0_g1
TRINITY_DN45956_c0_g1
TRINITY_DN45929_c1_g1
TRINITY_DN45954_c0_g1
TRINITY_DN45916_c0_g1
TRINITY_DN45932_c0_g1
TRINITY_DN45972_c1_g1
TRINITY_DN45962_c0_g1
TRINITY_DN45920_c0_g1
TRINITY_DN45988_c1_g1
TRINITY_DN45963_c0_g1
TRINITY_DN17662_c0_g1
TRINITY_DN58305_c0_g1
TRINITY_DN80827_c0_g1
TRINITY_DN37742_c0_g1
TRINITY_DN37791_c0_g1
TRINITY_DN37792_c0_g1
TRINITY_DN37778_c0_g1
TRINITY_DN37755_c0_g1
TRINITY_DN31472_c0_g1
TRINITY_DN31450_c0_g1
TRINITY_DN31468_c0_g1
TRINITY_DN31433_c0_g1
TRINITY_DN85660_c0_g1
TRINITY_DN18656_c0_g1
TRINITY_DN4095_c0_g2
TRINITY_DN34798_c0_g1
TRINITY_DN88971_c0_g1
TRINITY_DN38433_c0_g1
TRINITY_DN38403_c0_g1
TRINITY_DN63378_c0_g1
TRINITY_DN31746_c0_g1
TRINITY_DN39613_c0_g1
TRINITY_DN39644_c0_g1
TRINITY_DN39653_c0_g1
TRINITY_DN39620_c0_g1
TRINITY_DN39663_c0_g1
TRINITY_DN39672_c0_g1
TRINITY_DN39611_c0_g1
TRINITY_DN29523_c0_g1
TRINITY_DN29576_c0_g1
TRINITY_DN36703_c0_g1
TRINITY_DN36736_c0_g1
TRINITY_DN36792_c0_g1
TRINITY_DN36769_c0_g1
TRINITY_DN36788_c0_g1
TRINITY_DN36768_c0_g1
TRINITY_DN81093_c0_g1
TRINITY_DN23957_c0_g1
TRINITY_DN44692_c0_g1
TRINITY_DN44602_c0_g1
TRINITY_DN44632_c4_g1
TRINITY_DN44668_c0_g2
TRINITY_DN44660_c0_g1
TRINITY_DN44608_c1_g1
TRINITY_DN44608_c1_g3
TRINITY_DN44637_c0_g2
TRINITY_DN44625_c0_g1
TRINITY_DN44671_c1_g1
TRINITY_DN44641_c1_g1
TRINITY_DN44686_c0_g1
TRINITY_DN44697_c1_g1
TRINITY_DN44614_c0_g1
TRINITY_DN22847_c0_g1
TRINITY_DN22813_c0_g1
TRINITY_DN22814_c0_g1
TRINITY_DN22850_c0_g1
TRINITY_DN94552_c0_g1
TRINITY_DN37218_c0_g1
TRINITY_DN37280_c0_g1
TRINITY_DN37201_c0_g1
TRINITY_DN44014_c0_g2
TRINITY_DN44001_c0_g1
TRINITY_DN44003_c0_g2
TRINITY_DN44031_c0_g1
TRINITY_DN44037_c0_g1
TRINITY_DN44081_c0_g2
TRINITY_DN44077_c0_g1
TRINITY_DN44012_c0_g1
TRINITY_DN44012_c0_g2
TRINITY_DN44093_c0_g1
TRINITY_DN44028_c0_g1
TRINITY_DN44047_c0_g1
TRINITY_DN44026_c0_g1
TRINITY_DN44075_c0_g1
TRINITY_DN65741_c0_g1
TRINITY_DN47842_c1_g1
TRINITY_DN47833_c1_g3
TRINITY_DN47840_c0_g1
TRINITY_DN47850_c0_g1
TRINITY_DN47839_c0_g1
TRINITY_DN47801_c0_g1
TRINITY_DN47899_c1_g1
TRINITY_DN47834_c0_g1
TRINITY_DN47802_c0_g1
TRINITY_DN47813_c0_g1
TRINITY_DN47817_c0_g1
TRINITY_DN47817_c0_g2
TRINITY_DN47829_c0_g1
TRINITY_DN47829_c0_g2
TRINITY_DN47843_c1_g1
TRINITY_DN47861_c0_g1
TRINITY_DN47819_c0_g1
TRINITY_DN46813_c0_g1
TRINITY_DN46834_c0_g1
TRINITY_DN46885_c1_g2
TRINITY_DN46816_c1_g1
TRINITY_DN46889_c0_g1
TRINITY_DN46804_c0_g1
TRINITY_DN46804_c0_g4
TRINITY_DN46868_c1_g1
TRINITY_DN46868_c1_g3
TRINITY_DN46806_c0_g1
TRINITY_DN46811_c0_g1
TRINITY_DN46893_c0_g1
TRINITY_DN46815_c0_g1
TRINITY_DN46879_c0_g1
TRINITY_DN46891_c0_g1
TRINITY_DN46861_c0_g1
TRINITY_DN46861_c0_g2
TRINITY_DN36354_c0_g1
TRINITY_DN36348_c0_g1
TRINITY_DN36328_c0_g1
TRINITY_DN52498_c0_g1
TRINITY_DN52480_c2_g1
TRINITY_DN52403_c1_g1
TRINITY_DN52453_c1_g1
TRINITY_DN52487_c1_g1
TRINITY_DN52476_c1_g1
TRINITY_DN52401_c1_g2
TRINITY_DN52490_c5_g3
TRINITY_DN79072_c0_g1
TRINITY_DN11569_c0_g1
TRINITY_DN24818_c0_g1
TRINITY_DN38591_c0_g1
TRINITY_DN38594_c0_g1
TRINITY_DN38546_c0_g1
TRINITY_DN38572_c0_g1
TRINITY_DN38556_c0_g1
TRINITY_DN38575_c0_g1
TRINITY_DN95234_c0_g1
TRINITY_DN35876_c0_g1
TRINITY_DN35842_c0_g1
TRINITY_DN35862_c0_g1
TRINITY_DN35828_c0_g1
TRINITY_DN35899_c0_g2
TRINITY_DN94989_c0_g1
TRINITY_DN77932_c0_g1
TRINITY_DN13852_c0_g1
TRINITY_DN14985_c0_g1
TRINITY_DN99802_c0_g1
TRINITY_DN47613_c0_g1
TRINITY_DN47659_c0_g1
TRINITY_DN47645_c0_g2
TRINITY_DN47678_c0_g1
TRINITY_DN47662_c0_g1
TRINITY_DN47616_c0_g1
TRINITY_DN47616_c1_g1
TRINITY_DN47653_c1_g1
TRINITY_DN47652_c0_g1
TRINITY_DN47692_c0_g1
TRINITY_DN47693_c0_g1
TRINITY_DN47693_c1_g1
TRINITY_DN47694_c1_g1
TRINITY_DN47643_c0_g1
TRINITY_DN47644_c0_g1
TRINITY_DN47637_c0_g1
TRINITY_DN8740_c0_g1
TRINITY_DN3428_c0_g1
TRINITY_DN36006_c0_g3
TRINITY_DN36039_c0_g1
TRINITY_DN45255_c0_g1
TRINITY_DN45272_c0_g1
TRINITY_DN45234_c1_g1
TRINITY_DN45201_c0_g1
TRINITY_DN45292_c0_g2
TRINITY_DN45271_c0_g1
TRINITY_DN45206_c0_g1
TRINITY_DN45257_c1_g1
TRINITY_DN45256_c1_g1
TRINITY_DN50441_c0_g1
TRINITY_DN50406_c0_g1
TRINITY_DN50488_c0_g1
TRINITY_DN50463_c0_g1
[truncated: 107 more rows]

## Sheet: Elements only in KEGG
Elements only in KEGG :
TRINITY_DN65228_c0_g1
TRINITY_DN33218_c0_g1
TRINITY_DN6581_c0_g1
TRINITY_DN56703_c0_g1
TRINITY_DN79498_c0_g1
TRINITY_DN70690_c0_g1
TRINITY_DN100223_c0_g1
TRINITY_DN86042_c0_g1
TRINITY_DN55943_c0_g1

## Sheet: Elements only in NR
Elements only in NR :
TRINITY_DN35628_c0_g1
TRINITY_DN35635_c0_g1
TRINITY_DN35634_c0_g1
TRINITY_DN35648_c0_g1
TRINITY_DN35620_c1_g1
TRINITY_DN15975_c0_g1
TRINITY_DN74932_c0_g1
TRINITY_DN41082_c0_g1
TRINITY_DN41030_c0_g1
TRINITY_DN41033_c0_g1
TRINITY_DN41096_c1_g2
TRINITY_DN39596_c1_g1
TRINITY_DN39587_c0_g1
TRINITY_DN39559_c0_g1
TRINITY_DN39547_c0_g1
TRINITY_DN39598_c0_g1
TRINITY_DN39573_c0_g1
TRINITY_DN39548_c0_g1
TRINITY_DN39524_c0_g1
TRINITY_DN39554_c0_g1
TRINITY_DN39583_c0_g1
TRINITY_DN39562_c0_g3
TRINITY_DN39515_c0_g1
TRINITY_DN23010_c0_g1
TRINITY_DN23083_c0_g1
TRINITY_DN23018_c0_g1
TRINITY_DN23058_c0_g1
TRINITY_DN23007_c0_g1
TRINITY_DN13442_c1_g1
TRINITY_DN13448_c0_g1
TRINITY_DN13425_c0_g1
TRINITY_DN13494_c0_g2
TRINITY_DN12025_c0_g1
TRINITY_DN78734_c0_g1
TRINITY_DN78709_c0_g1
TRINITY_DN99919_c0_g1
TRINITY_DN99935_c0_g1
TRINITY_DN99915_c0_g1
TRINITY_DN425_c0_g1
TRINITY_DN451_c0_g1
TRINITY_DN440_c0_g1
TRINITY_DN19325_c0_g1
TRINITY_DN37111_c0_g1
TRINITY_DN37164_c0_g1
TRINITY_DN37152_c0_g1
TRINITY_DN37188_c0_g1
TRINITY_DN37188_c0_g2
TRINITY_DN37182_c0_g1
TRINITY_DN37173_c1_g1
TRINITY_DN37123_c0_g1
TRINITY_DN66482_c0_g1
TRINITY_DN66478_c0_g1
TRINITY_DN54129_c0_g1
TRINITY_DN54196_c0_g1
TRINITY_DN54172_c0_g1
TRINITY_DN53695_c0_g1
TRINITY_DN53658_c0_g1
TRINITY_DN53672_c0_g1
TRINITY_DN765_c0_g1
TRINITY_DN781_c0_g1
TRINITY_DN2087_c0_g1
TRINITY_DN16774_c0_g1
TRINITY_DN76899_c0_g1
TRINITY_DN76811_c0_g1
TRINITY_DN76854_c0_g1
TRINITY_DN61786_c0_g1
TRINITY_DN61774_c0_g1
TRINITY_DN61737_c0_g1
TRINITY_DN61738_c0_g1
TRINITY_DN96213_c0_g1
TRINITY_DN96211_c0_g1
TRINITY_DN27509_c0_g1
TRINITY_DN27590_c0_g1
TRINITY_DN27538_c0_g1
TRINITY_DN20947_c0_g1
TRINITY_DN20971_c0_g1
TRINITY_DN20945_c0_g1
TRINITY_DN20933_c0_g1
TRINITY_DN20963_c0_g1
TRINITY_DN61846_c0_g1
TRINITY_DN90456_c0_g1
TRINITY_DN90494_c0_g1
TRINITY_DN90411_c0_g1
TRINITY_DN90479_c0_g1
TRINITY_DN71492_c0_g1
TRINITY_DN71483_c0_g1
TRINITY_DN33064_c0_g1
TRINITY_DN33009_c0_g1
TRINITY_DN33047_c0_g1
TRINITY_DN33093_c0_g1
TRINITY_DN33085_c0_g1
TRINITY_DN33053_c0_g1
TRINITY_DN11423_c0_g1
TRINITY_DN1620_c0_g1
TRINITY_DN1688_c0_g1
TRINITY_DN1615_c0_g1
TRINITY_DN1631_c0_g1
TRINITY_DN1684_c0_g1
TRINITY_DN83091_c0_g1
TRINITY_DN83055_c0_g1
TRINITY_DN34008_c0_g1
TRINITY_DN34054_c0_g1
TRINITY_DN34090_c1_g1
TRINITY_DN34016_c0_g1
TRINITY_DN34079_c0_g1
TRINITY_DN34047_c0_g1
TRINITY_DN27687_c0_g1
TRINITY_DN27623_c0_g1
TRINITY_DN27649_c0_g1
TRINITY_DN27664_c0_g1
TRINITY_DN27672_c0_g1
TRINITY_DN27662_c0_g1
TRINITY_DN65926_c0_g1
TRINITY_DN65977_c0_g1
TRINITY_DN39905_c0_g1
TRINITY_DN39921_c0_g1
TRINITY_DN39968_c0_g1
TRINITY_DN56265_c0_g1
TRINITY_DN56290_c0_g1
TRINITY_DN2976_c0_g1
TRINITY_DN2995_c0_g1
TRINITY_DN2981_c0_g1
TRINITY_DN49142_c1_g1
TRINITY_DN49142_c2_g1
TRINITY_DN49142_c3_g1
TRINITY_DN49142_c3_g2
TRINITY_DN49154_c0_g1
TRINITY_DN49192_c2_g1
TRINITY_DN49102_c0_g1
TRINITY_DN49188_c0_g2
TRINITY_DN49110_c1_g5
TRINITY_DN49153_c0_g1
TRINITY_DN49121_c5_g1
TRINITY_DN49193_c0_g1
TRINITY_DN49169_c1_g1
TRINITY_DN49181_c4_g1
TRINITY_DN49165_c1_g1
TRINITY_DN25534_c0_g1
TRINITY_DN65443_c0_g1
TRINITY_DN27956_c0_g1
TRINITY_DN27905_c0_g1
TRINITY_DN27910_c0_g1
TRINITY_DN27998_c0_g1
TRINITY_DN62774_c0_g1
TRINITY_DN62788_c0_g1
TRINITY_DN62730_c0_g1
TRINITY_DN91902_c0_g1
TRINITY_DN91974_c0_g1
TRINITY_DN78566_c0_g1
TRINITY_DN78516_c0_g1
TRINITY_DN96672_c0_g1
TRINITY_DN96654_c0_g1
TRINITY_DN96682_c0_g1
TRINITY_DN96668_c0_g1
TRINITY_DN96692_c0_g1
TRINITY_DN16183_c0_g1
TRINITY_DN16138_c0_g1
TRINITY_DN93887_c0_g1
TRINITY_DN93855_c0_g1
TRINITY_DN51676_c0_g1
TRINITY_DN51676_c0_g3
TRINITY_DN51665_c3_g1
TRINITY_DN51642_c4_g2
TRINITY_DN51689_c1_g1
TRINITY_DN51639_c10_g1
TRINITY_DN51648_c1_g1
TRINITY_DN51638_c1_g2
TRINITY_DN51691_c7_g1
TRINITY_DN51658_c0_g1
TRINITY_DN51606_c1_g1
TRINITY_DN51613_c2_g3
TRINITY_DN51613_c2_g2
TRINITY_DN51634_c1_g1
TRINITY_DN37874_c0_g1
TRINITY_DN37849_c0_g1
TRINITY_DN37829_c0_g1
TRINITY_DN5225_c0_g1
TRINITY_DN5294_c0_g1
TRINITY_DN5288_c0_g1
TRINITY_DN4645_c0_g1
TRINITY_DN4662_c0_g1
TRINITY_DN4621_c0_g1
TRINITY_DN55612_c0_g1
TRINITY_DN32130_c0_g1
TRINITY_DN32156_c0_g3
TRINITY_DN53393_c0_g1
TRINITY_DN53361_c0_g1
TRINITY_DN51779_c3_g4
TRINITY_DN51707_c0_g1
TRINITY_DN51706_c2_g3
TRINITY_DN51796_c1_g1
TRINITY_DN51717_c0_g2
TRINITY_DN51712_c2_g1
TRINITY_DN51704_c1_g1
TRINITY_DN51738_c1_g1
TRINITY_DN51785_c3_g1
TRINITY_DN51748_c1_g1
TRINITY_DN76966_c0_g1
TRINITY_DN76999_c0_g1
TRINITY_DN76975_c0_g1
TRINITY_DN54985_c0_g1
TRINITY_DN54971_c0_g1
TRINITY_DN54953_c0_g1
TRINITY_DN31151_c0_g1
TRINITY_DN31187_c0_g1
TRINITY_DN31150_c0_g1
TRINITY_DN31108_c0_g1
TRINITY_DN31183_c0_g1
TRINITY_DN98546_c0_g1
TRINITY_DN58618_c0_g1
TRINITY_DN58647_c0_g1
TRINITY_DN52396_c1_g4
TRINITY_DN52397_c1_g2
TRINITY_DN52394_c0_g1
TRINITY_DN52341_c1_g3
TRINITY_DN52356_c4_g5
TRINITY_DN52356_c4_g6
TRINITY_DN52356_c5_g1
TRINITY_DN52387_c0_g1
TRINITY_DN52375_c3_g1
TRINITY_DN52366_c1_g1
TRINITY_DN52372_c0_g1
TRINITY_DN52314_c0_g1
TRINITY_DN52369_c1_g2
TRINITY_DN52324_c1_g1
TRINITY_DN52346_c1_g1
TRINITY_DN52357_c1_g1
TRINITY_DN52322_c1_g1
TRINITY_DN52308_c0_g2
TRINITY_DN52329_c2_g1
TRINITY_DN52329_c2_g3
TRINITY_DN14193_c0_g1
TRINITY_DN14153_c0_g1
TRINITY_DN25132_c0_g1
TRINITY_DN46587_c0_g1
TRINITY_DN46509_c1_g2
TRINITY_DN46537_c3_g5
TRINITY_DN46507_c0_g2
TRINITY_DN46586_c0_g3
TRINITY_DN46512_c0_g1
TRINITY_DN82759_c0_g1
TRINITY_DN82788_c0_g1
TRINITY_DN82785_c0_g1
TRINITY_DN82758_c0_g1
TRINITY_DN39435_c0_g2
TRINITY_DN39499_c0_g1
TRINITY_DN39474_c0_g1
TRINITY_DN39460_c1_g1
TRINITY_DN39423_c0_g1
TRINITY_DN39434_c0_g1
TRINITY_DN78102_c0_g1
TRINITY_DN52663_c0_g1
TRINITY_DN52626_c0_g1
TRINITY_DN52669_c0_g1
TRINITY_DN52624_c0_g1
TRINITY_DN52631_c0_g1
TRINITY_DN50512_c2_g1
TRINITY_DN50553_c0_g2
TRINITY_DN50553_c0_g1
TRINITY_DN50534_c5_g1
TRINITY_DN50568_c0_g1
TRINITY_DN50514_c2_g1
TRINITY_DN50514_c2_g2
TRINITY_DN50549_c0_g2
TRINITY_DN50549_c0_g1
TRINITY_DN50501_c0_g1
TRINITY_DN50582_c2_g1
TRINITY_DN50582_c2_g5
TRINITY_DN50525_c0_g1
TRINITY_DN68443_c0_g1
TRINITY_DN68429_c0_g1
TRINITY_DN68421_c0_g1
TRINITY_DN68449_c0_g1
TRINITY_DN93473_c0_g1
TRINITY_DN93472_c0_g1
TRINITY_DN26793_c0_g1
TRINITY_DN26766_c0_g1
TRINITY_DN26754_c0_g1
TRINITY_DN26712_c0_g1
TRINITY_DN26768_c0_g1
TRINITY_DN43860_c0_g1
TRINITY_DN43844_c0_g2
TRINITY_DN43834_c0_g1
TRINITY_DN43872_c0_g1
TRINITY_DN43821_c0_g1
TRINITY_DN43870_c0_g1
TRINITY_DN43836_c1_g1
TRINITY_DN43810_c1_g1
TRINITY_DN47391_c0_g1
TRINITY_DN47317_c4_g1
TRINITY_DN47333_c6_g3
TRINITY_DN13600_c0_g1
TRINITY_DN13695_c0_g1
TRINITY_DN13622_c0_g1
TRINITY_DN77380_c0_g1
TRINITY_DN77390_c0_g1
TRINITY_DN69257_c0_g1
TRINITY_DN69287_c0_g1
TRINITY_DN69210_c0_g1
TRINITY_DN98790_c0_g1
TRINITY_DN89286_c0_g1
TRINITY_DN89229_c0_g1
TRINITY_DN89258_c0_g1
TRINITY_DN89280_c0_g1
TRINITY_DN89294_c0_g1
TRINITY_DN48330_c0_g3
TRINITY_DN48300_c0_g1
TRINITY_DN48300_c0_g2
TRINITY_DN48344_c0_g1
TRINITY_DN48396_c1_g1
TRINITY_DN48316_c0_g1
TRINITY_DN40005_c0_g1
TRINITY_DN40014_c0_g1
TRINITY_DN40045_c0_g1
TRINITY_DN40080_c0_g1
TRINITY_DN40085_c0_g1
TRINITY_DN40079_c0_g1
TRINITY_DN40096_c0_g1
TRINITY_DN40092_c0_g1
TRINITY_DN40025_c0_g1
TRINITY_DN61448_c0_g1
TRINITY_DN48471_c0_g1
TRINITY_DN48450_c0_g4
TRINITY_DN48436_c0_g4
TRINITY_DN48490_c2_g1
TRINITY_DN48469_c7_g1
TRINITY_DN48466_c1_g2
TRINITY_DN48468_c0_g1
TRINITY_DN48442_c0_g1
TRINITY_DN48417_c1_g2
TRINITY_DN37396_c2_g2
TRINITY_DN37306_c0_g1
TRINITY_DN37395_c0_g2
TRINITY_DN37395_c0_g1
TRINITY_DN37340_c0_g1
TRINITY_DN37324_c0_g1
TRINITY_DN37371_c0_g1
TRINITY_DN33698_c0_g1
TRINITY_DN33667_c0_g1
TRINITY_DN33618_c0_g1
TRINITY_DN33635_c0_g1
TRINITY_DN67548_c0_g1
TRINITY_DN67550_c0_g1
TRINITY_DN91185_c0_g1
TRINITY_DN91152_c0_g1
TRINITY_DN23528_c0_g1
TRINITY_DN23579_c0_g1
TRINITY_DN23578_c0_g1
TRINITY_DN77822_c0_g1
TRINITY_DN77804_c0_g1
TRINITY_DN63432_c0_g1
TRINITY_DN63488_c0_g1
TRINITY_DN37965_c0_g1
TRINITY_DN37918_c1_g1
TRINITY_DN37930_c0_g2
TRINITY_DN37923_c0_g1
TRINITY_DN87190_c0_g1
TRINITY_DN87161_c0_g1
TRINITY_DN87128_c0_g1
TRINITY_DN87187_c0_g1
TRINITY_DN73099_c0_g1
TRINITY_DN73087_c0_g1
TRINITY_DN52966_c0_g1
TRINITY_DN52940_c0_g1
TRINITY_DN52954_c0_g1
TRINITY_DN52965_c0_g1
TRINITY_DN52908_c0_g1
TRINITY_DN52999_c0_g1
TRINITY_DN49808_c0_g3
TRINITY_DN49808_c0_g1
TRINITY_DN49827_c0_g1
TRINITY_DN49873_c0_g2
TRINITY_DN49873_c0_g1
TRINITY_DN49873_c0_g4
TRINITY_DN49896_c1_g2
TRINITY_DN49896_c2_g1
TRINITY_DN49866_c1_g1
TRINITY_DN49805_c6_g1
TRINITY_DN49803_c3_g2
TRINITY_DN49803_c3_g1
TRINITY_DN49824_c0_g2
TRINITY_DN87349_c0_g1
TRINITY_DN87313_c0_g1
TRINITY_DN59434_c0_g1
TRINITY_DN59425_c0_g1
TRINITY_DN59415_c0_g1
TRINITY_DN59480_c0_g1
TRINITY_DN21829_c0_g1
TRINITY_DN21873_c0_g1
TRINITY_DN21835_c0_g1
TRINITY_DN47799_c0_g1
TRINITY_DN47750_c4_g3
TRINITY_DN47792_c1_g1
TRINITY_DN47764_c2_g1
TRINITY_DN47764_c4_g1
TRINITY_DN47702_c0_g2
TRINITY_DN47732_c0_g1
TRINITY_DN47722_c0_g1
TRINITY_DN47793_c0_g2
TRINITY_DN56691_c0_g1
TRINITY_DN28999_c0_g1
TRINITY_DN28949_c0_g1
TRINITY_DN28961_c0_g1
TRINITY_DN28941_c0_g1
TRINITY_DN28935_c0_g1
TRINITY_DN28974_c0_g1
TRINITY_DN43390_c1_g1
TRINITY_DN43348_c0_g5
TRINITY_DN43372_c0_g1
TRINITY_DN43395_c0_g1
TRINITY_DN21192_c0_g1
TRINITY_DN92654_c0_g1
TRINITY_DN92640_c0_g1
TRINITY_DN92666_c0_g1
TRINITY_DN92664_c0_g1
TRINITY_DN42960_c0_g1
TRINITY_DN42985_c0_g1
TRINITY_DN42912_c0_g1
TRINITY_DN42977_c0_g1
TRINITY_DN13586_c0_g1
TRINITY_DN13538_c0_g1
TRINITY_DN9329_c0_g1
TRINITY_DN69758_c0_g1
TRINITY_DN69790_c0_g1
TRINITY_DN96742_c0_g1
TRINITY_DN96718_c0_g1
TRINITY_DN96701_c0_g1
TRINITY_DN60532_c0_g1
TRINITY_DN60599_c0_g1
TRINITY_DN60562_c0_g1
TRINITY_DN60573_c0_g1
TRINITY_DN24759_c0_g1
TRINITY_DN24718_c0_g1
TRINITY_DN24723_c0_g1
TRINITY_DN22207_c0_g1
TRINITY_DN50932_c0_g1
TRINITY_DN50964_c0_g2
TRINITY_DN50915_c0_g4
TRINITY_DN50915_c0_g1
TRINITY_DN50961_c2_g1
TRINITY_DN50961_c4_g1
TRINITY_DN50920_c1_g1
TRINITY_DN50911_c1_g1
TRINITY_DN50987_c0_g1
TRINITY_DN50987_c0_g2
TRINITY_DN50968_c1_g3
TRINITY_DN50934_c5_g1
TRINITY_DN41342_c3_g1
TRINITY_DN41359_c0_g1
TRINITY_DN41322_c0_g1
TRINITY_DN41380_c0_g1
TRINITY_DN41389_c1_g1
TRINITY_DN41325_c0_g1
TRINITY_DN17530_c0_g1
TRINITY_DN17561_c0_g1
TRINITY_DN17534_c0_g1
TRINITY_DN30013_c0_g1
TRINITY_DN30040_c0_g1
TRINITY_DN30052_c0_g1
TRINITY_DN30020_c0_g1
TRINITY_DN30036_c0_g1
TRINITY_DN48116_c2_g1
TRINITY_DN48114_c0_g2
TRINITY_DN48162_c0_g1
TRINITY_DN48198_c0_g6
TRINITY_DN48157_c3_g5
TRINITY_DN48157_c3_g1
TRINITY_DN48146_c0_g1
TRINITY_DN48166_c0_g1
TRINITY_DN48191_c1_g1
TRINITY_DN12430_c0_g1
TRINITY_DN86518_c0_g1
TRINITY_DN86592_c0_g1
TRINITY_DN53925_c0_g1
TRINITY_DN92157_c0_g1
TRINITY_DN32960_c0_g1
TRINITY_DN54030_c0_g1
TRINITY_DN54060_c0_g1
TRINITY_DN70924_c0_g1
TRINITY_DN88589_c0_g1
TRINITY_DN88521_c0_g1
TRINITY_DN40968_c0_g1
TRINITY_DN40987_c0_g1
TRINITY_DN40987_c0_g2
TRINITY_DN40987_c0_g3
TRINITY_DN40959_c2_g1
TRINITY_DN40996_c0_g1
TRINITY_DN40981_c0_g1
TRINITY_DN40980_c0_g1
TRINITY_DN40916_c0_g1
TRINITY_DN40905_c0_g1
TRINITY_DN40993_c0_g4
TRINITY_DN40932_c0_g1
TRINITY_DN40970_c0_g1
TRINITY_DN40950_c0_g1
TRINITY_DN57088_c0_g1
TRINITY_DN30885_c0_g1
TRINITY_DN60471_c0_g1
TRINITY_DN60420_c0_g1
TRINITY_DN60408_c0_g1
TRINITY_DN95905_c0_g1
TRINITY_DN95926_c0_g1
TRINITY_DN55145_c0_g1
TRINITY_DN55128_c0_g1
TRINITY_DN55194_c0_g1
TRINITY_DN93792_c0_g1
TRINITY_DN93714_c0_g1
TRINITY_DN74851_c0_g1
TRINITY_DN74823_c0_g1
TRINITY_DN43441_c1_g1
TRINITY_DN43441_c3_g1
TRINITY_DN43408_c0_g1
TRINITY_DN43403_c0_g1
TRINITY_DN43492_c0_g1
TRINITY_DN43455_c0_g1
TRINITY_DN43468_c0_g1
TRINITY_DN43406_c0_g1
TRINITY_DN43450_c0_g1
TRINITY_DN72423_c0_g1
TRINITY_DN72402_c0_g1
TRINITY_DN92769_c0_g1
TRINITY_DN92775_c0_g1
TRINITY_DN92708_c0_g1
TRINITY_DN25829_c0_g1
TRINITY_DN25879_c0_g1
TRINITY_DN25881_c0_g1
TRINITY_DN25831_c0_g1
TRINITY_DN52747_c0_g1
TRINITY_DN52729_c0_g1
TRINITY_DN52753_c0_g1
TRINITY_DN52792_c0_g1
TRINITY_DN7696_c0_g1
TRINITY_DN48903_c0_g1
TRINITY_DN48968_c3_g1
TRINITY_DN48952_c1_g1
TRINITY_DN48952_c1_g2
TRINITY_DN48905_c0_g2
TRINITY_DN48907_c0_g2
TRINITY_DN48928_c1_g2
TRINITY_DN48928_c1_g4
TRINITY_DN48984_c9_g2
TRINITY_DN64241_c0_g1
TRINITY_DN62519_c0_g1
TRINITY_DN62581_c0_g1
TRINITY_DN62508_c0_g1
TRINITY_DN36224_c0_g1
TRINITY_DN36243_c0_g1
TRINITY_DN36208_c0_g1
TRINITY_DN36296_c0_g1
TRINITY_DN36213_c0_g1
TRINITY_DN80655_c0_g1
TRINITY_DN80663_c0_g1
TRINITY_DN94186_c0_g1
TRINITY_DN94102_c0_g1
TRINITY_DN94122_c0_g1
TRINITY_DN35720_c0_g1
TRINITY_DN35777_c0_g1
TRINITY_DN35789_c0_g1
TRINITY_DN35782_c0_g2
TRINITY_DN35705_c0_g1
TRINITY_DN35781_c0_g1
TRINITY_DN35733_c0_g1
TRINITY_DN14014_c0_g1
TRINITY_DN14045_c0_g1
TRINITY_DN84922_c0_g1
TRINITY_DN84906_c0_g1
TRINITY_DN84937_c0_g1
TRINITY_DN84967_c0_g1
TRINITY_DN84933_c0_g1
TRINITY_DN84934_c0_g1
TRINITY_DN13168_c0_g1
TRINITY_DN13138_c0_g1
TRINITY_DN83271_c0_g1
TRINITY_DN83277_c0_g1
TRINITY_DN19988_c0_g1
TRINITY_DN19978_c0_g1
TRINITY_DN66830_c0_g1
TRINITY_DN66824_c0_g1
TRINITY_DN66801_c0_g1
TRINITY_DN66805_c0_g1
TRINITY_DN80341_c0_g1
TRINITY_DN42608_c0_g1
TRINITY_DN42608_c0_g2
TRINITY_DN42611_c0_g1
TRINITY_DN42635_c0_g1
TRINITY_DN42653_c0_g2
TRINITY_DN42690_c0_g1
TRINITY_DN42691_c0_g1
TRINITY_DN42621_c1_g1
TRINITY_DN42655_c0_g1
TRINITY_DN30950_c1_g1
TRINITY_DN30904_c0_g1
TRINITY_DN28582_c0_g1
TRINITY_DN28523_c0_g1
TRINITY_DN89304_c0_g1
TRINITY_DN17390_c0_g1
TRINITY_DN17324_c0_g1
TRINITY_DN17337_c0_g1
TRINITY_DN17398_c0_g1
TRINITY_DN17331_c0_g1
TRINITY_DN17303_c0_g1
TRINITY_DN44937_c0_g1
TRINITY_DN44932_c0_g1
TRINITY_DN44908_c0_g1
TRINITY_DN44901_c0_g1
TRINITY_DN44930_c0_g3
TRINITY_DN44909_c0_g2
TRINITY_DN44981_c4_g1
TRINITY_DN44981_c5_g1
TRINITY_DN44981_c5_g2
TRINITY_DN90158_c0_g1
TRINITY_DN90173_c0_g1
TRINITY_DN67205_c0_g1
TRINITY_DN47563_c2_g1
TRINITY_DN47530_c2_g1
TRINITY_DN47551_c0_g1
TRINITY_DN47561_c2_g1
TRINITY_DN47561_c3_g1
TRINITY_DN47564_c0_g1
TRINITY_DN47567_c1_g1
TRINITY_DN47550_c4_g1
TRINITY_DN47558_c3_g1
TRINITY_DN47584_c0_g1
TRINITY_DN47503_c0_g1
TRINITY_DN80477_c0_g1
TRINITY_DN10164_c0_g1
TRINITY_DN10196_c0_g1
TRINITY_DN10193_c0_g1
TRINITY_DN36671_c0_g1
TRINITY_DN36684_c0_g1
TRINITY_DN36654_c0_g1
TRINITY_DN36687_c0_g1
TRINITY_DN36680_c1_g1
TRINITY_DN28221_c0_g1
TRINITY_DN28250_c0_g1
TRINITY_DN28224_c0_g1
TRINITY_DN28279_c0_g1
TRINITY_DN70781_c0_g1
TRINITY_DN70752_c0_g1
TRINITY_DN70767_c0_g1
TRINITY_DN70739_c0_g1
TRINITY_DN31946_c0_g1
TRINITY_DN31910_c0_g1
TRINITY_DN31997_c0_g1
TRINITY_DN49628_c1_g4
TRINITY_DN49622_c2_g1
TRINITY_DN49622_c4_g1
TRINITY_DN49662_c1_g2
TRINITY_DN49662_c1_g3
TRINITY_DN49625_c0_g2
TRINITY_DN49616_c0_g1
TRINITY_DN49616_c0_g2
TRINITY_DN49621_c0_g1
TRINITY_DN49687_c6_g2
TRINITY_DN49669_c5_g1
TRINITY_DN49669_c5_g2
TRINITY_DN49639_c0_g2
TRINITY_DN49681_c0_g1
TRINITY_DN30492_c0_g1
TRINITY_DN30483_c0_g1
TRINITY_DN30460_c0_g1
TRINITY_DN30425_c0_g1
TRINITY_DN96439_c0_g1
TRINITY_DN96432_c0_g1
TRINITY_DN96412_c0_g1
TRINITY_DN96448_c0_g1
TRINITY_DN22617_c0_g1
TRINITY_DN22672_c0_g1
TRINITY_DN25391_c1_g1
TRINITY_DN91455_c0_g1
TRINITY_DN91439_c0_g1
TRINITY_DN21071_c0_g1
TRINITY_DN88387_c0_g1
TRINITY_DN88307_c0_g1
TRINITY_DN28113_c0_g1
TRINITY_DN28108_c0_g1
TRINITY_DN28184_c0_g1
TRINITY_DN28199_c0_g1
TRINITY_DN74508_c0_g1
TRINITY_DN55312_c0_g1
TRINITY_DN55365_c0_g1
TRINITY_DN55335_c0_g1
TRINITY_DN7597_c0_g1
TRINITY_DN84706_c0_g1
TRINITY_DN70019_c0_g1
TRINITY_DN70099_c0_g1
TRINITY_DN70055_c0_g1
TRINITY_DN53869_c0_g1
TRINITY_DN53840_c0_g1
TRINITY_DN53855_c0_g1
TRINITY_DN16052_c0_g1
TRINITY_DN54699_c0_g1
TRINITY_DN88142_c0_g1
TRINITY_DN88170_c0_g1
TRINITY_DN88150_c0_g1
TRINITY_DN88153_c0_g1
TRINITY_DN88107_c0_g1
TRINITY_DN73742_c0_g1
TRINITY_DN73775_c0_g1
TRINITY_DN73747_c0_g1
TRINITY_DN15138_c1_g1
TRINITY_DN15120_c0_g1
TRINITY_DN15127_c0_g1
TRINITY_DN15101_c0_g1
TRINITY_DN3122_c0_g1
TRINITY_DN3135_c0_g1
TRINITY_DN3145_c0_g1
TRINITY_DN58980_c0_g1
TRINITY_DN58957_c0_g1
TRINITY_DN58970_c0_g1
TRINITY_DN58995_c0_g1
TRINITY_DN58987_c0_g1
TRINITY_DN84021_c0_g1
TRINITY_DN84045_c0_g1
TRINITY_DN84077_c0_g1
TRINITY_DN48595_c0_g1
TRINITY_DN48550_c0_g1
TRINITY_DN48529_c0_g1
TRINITY_DN48530_c0_g1
TRINITY_DN48546_c1_g1
TRINITY_DN48589_c0_g2
TRINITY_DN48575_c0_g1
TRINITY_DN20203_c0_g1
TRINITY_DN19745_c0_g1
TRINITY_DN19760_c0_g1
TRINITY_DN84679_c0_g1
TRINITY_DN84674_c0_g1
TRINITY_DN84643_c0_g1
TRINITY_DN14260_c0_g1
TRINITY_DN14250_c0_g1
TRINITY_DN44318_c0_g1
TRINITY_DN44353_c0_g1
TRINITY_DN44301_c0_g2
TRINITY_DN44301_c0_g3
TRINITY_DN44301_c0_g1
TRINITY_DN44396_c0_g1
TRINITY_DN44394_c0_g1
TRINITY_DN44346_c1_g1
TRINITY_DN95636_c0_g1
TRINITY_DN95685_c0_g1
TRINITY_DN95681_c0_g1
TRINITY_DN95638_c0_g1
TRINITY_DN20810_c0_g1
TRINITY_DN20822_c0_g1
TRINITY_DN65140_c0_g1
TRINITY_DN65102_c0_g1
TRINITY_DN65118_c0_g1
TRINITY_DN65113_c0_g1
TRINITY_DN51263_c2_g1
TRINITY_DN51297_c0_g2
TRINITY_DN51296_c2_g1
TRINITY_DN51238_c3_g1
TRINITY_DN51200_c2_g1
TRINITY_DN51251_c5_g3
TRINITY_DN51262_c0_g5
TRINITY_DN51279_c2_g3
TRINITY_DN51269_c1_g2
TRINITY_DN38673_c0_g1
TRINITY_DN38693_c0_g1
TRINITY_DN44811_c1_g1
TRINITY_DN44858_c0_g1
TRINITY_DN44807_c0_g1
TRINITY_DN44863_c0_g1
TRINITY_DN44831_c0_g2
TRINITY_DN44809_c0_g1
TRINITY_DN44817_c0_g1
TRINITY_DN44890_c1_g1
TRINITY_DN15493_c0_g1
TRINITY_DN15463_c0_g1
TRINITY_DN78938_c0_g1
TRINITY_DN78947_c0_g1
TRINITY_DN78919_c0_g1
TRINITY_DN47283_c0_g1
TRINITY_DN47227_c0_g1
TRINITY_DN47258_c5_g1
TRINITY_DN47252_c0_g3
TRINITY_DN47235_c0_g3
TRINITY_DN47218_c3_g2
TRINITY_DN47244_c0_g1
TRINITY_DN47277_c0_g1
TRINITY_DN47277_c2_g2
TRINITY_DN47243_c0_g1
TRINITY_DN47261_c0_g1
TRINITY_DN47297_c0_g1
TRINITY_DN47205_c0_g1
TRINITY_DN63932_c0_g1
TRINITY_DN63935_c0_g1
TRINITY_DN63585_c0_g1
TRINITY_DN63575_c0_g1
TRINITY_DN18950_c0_g1
TRINITY_DN18952_c0_g1
TRINITY_DN3920_c0_g1
TRINITY_DN3998_c0_g1
TRINITY_DN53119_c0_g1
TRINITY_DN53171_c0_g1
TRINITY_DN53131_c0_g1
TRINITY_DN53111_c0_g1
TRINITY_DN88209_c0_g1
TRINITY_DN88255_c0_g1
TRINITY_DN56985_c0_g1
TRINITY_DN56997_c0_g1
TRINITY_DN56966_c0_g1
TRINITY_DN60804_c0_g1
TRINITY_DN60810_c0_g1
TRINITY_DN29632_c0_g1
TRINITY_DN29622_c0_g1
TRINITY_DN96310_c0_g1
TRINITY_DN96388_c0_g1
TRINITY_DN62620_c0_g1
TRINITY_DN62612_c0_g1
TRINITY_DN62687_c0_g1
TRINITY_DN42367_c0_g1
TRINITY_DN42329_c0_g1
TRINITY_DN42347_c0_g1
TRINITY_DN42362_c0_g1
TRINITY_DN42362_c0_g2
TRINITY_DN42363_c0_g1
TRINITY_DN43178_c1_g1
TRINITY_DN43138_c1_g2
TRINITY_DN43169_c0_g1
TRINITY_DN43186_c0_g1
TRINITY_DN43186_c0_g2
TRINITY_DN43148_c0_g1
TRINITY_DN43155_c0_g1
TRINITY_DN43151_c0_g1
TRINITY_DN43190_c0_g1
TRINITY_DN43167_c0_g1
TRINITY_DN43126_c0_g1
TRINITY_DN43104_c0_g1
TRINITY_DN29868_c0_g1
TRINITY_DN29804_c0_g1
TRINITY_DN29893_c0_g1
TRINITY_DN29831_c0_g1
TRINITY_DN29875_c0_g1
TRINITY_DN29865_c1_g1
TRINITY_DN29849_c0_g1
TRINITY_DN89628_c0_g1
TRINITY_DN89660_c0_g1
TRINITY_DN89613_c0_g1
TRINITY_DN97222_c0_g1
TRINITY_DN97217_c0_g1
TRINITY_DN97203_c0_g1
TRINITY_DN9171_c0_g1
TRINITY_DN15208_c0_g1
TRINITY_DN15242_c0_g1
TRINITY_DN15254_c0_g1
TRINITY_DN26203_c0_g1
TRINITY_DN26287_c0_g1
TRINITY_DN26260_c0_g1
TRINITY_DN41163_c3_g2
TRINITY_DN41163_c3_g5
TRINITY_DN41179_c0_g1
TRINITY_DN41125_c0_g1
TRINITY_DN41120_c0_g2
TRINITY_DN41140_c0_g1
TRINITY_DN41133_c0_g1
TRINITY_DN41169_c0_g1
TRINITY_DN41145_c0_g1
TRINITY_DN41152_c0_g1
TRINITY_DN41186_c0_g1
TRINITY_DN94013_c0_g1
TRINITY_DN94074_c0_g1
TRINITY_DN94029_c0_g1
TRINITY_DN97740_c0_g1
TRINITY_DN79367_c0_g1
TRINITY_DN79318_c0_g1
TRINITY_DN18870_c0_g1
TRINITY_DN18817_c0_g1
TRINITY_DN18871_c0_g1
TRINITY_DN18881_c0_g1
TRINITY_DN21955_c0_g1
TRINITY_DN21930_c0_g1
TRINITY_DN21961_c0_g1
TRINITY_DN21926_c0_g1
TRINITY_DN21940_c0_g1
TRINITY_DN21967_c0_g1
TRINITY_DN68615_c0_g1
TRINITY_DN68691_c0_g1
TRINITY_DN42400_c0_g1
TRINITY_DN42497_c0_g1
TRINITY_DN42442_c0_g2
TRINITY_DN42490_c0_g1
TRINITY_DN42479_c0_g1
TRINITY_DN70529_c0_g1
TRINITY_DN70549_c0_g1
TRINITY_DN70527_c0_g1
TRINITY_DN92290_c0_g1
TRINITY_DN92277_c0_g1
TRINITY_DN92210_c0_g1
TRINITY_DN92212_c0_g1
TRINITY_DN92203_c0_g1
TRINITY_DN92249_c0_g1
TRINITY_DN92273_c0_g1
TRINITY_DN92217_c0_g1
TRINITY_DN61281_c0_g1
TRINITY_DN61205_c0_g1
TRINITY_DN61223_c0_g1
TRINITY_DN61246_c0_g1
TRINITY_DN51939_c0_g2
TRINITY_DN51988_c3_g2
TRINITY_DN51988_c3_g1
TRINITY_DN51988_c3_g3
TRINITY_DN51988_c3_g10
TRINITY_DN51998_c4_g2
TRINITY_DN51975_c3_g1
TRINITY_DN51970_c4_g4
TRINITY_DN51966_c3_g1
TRINITY_DN51966_c4_g3
TRINITY_DN51990_c0_g2
TRINITY_DN51919_c3_g1
TRINITY_DN51996_c1_g1
TRINITY_DN51979_c0_g1
TRINITY_DN51993_c2_g1
TRINITY_DN51993_c2_g4
TRINITY_DN51972_c0_g1
TRINITY_DN19241_c0_g1
TRINITY_DN19262_c0_g1
TRINITY_DN74144_c0_g1
TRINITY_DN74101_c0_g1
TRINITY_DN74170_c0_g1
TRINITY_DN74143_c0_g1
TRINITY_DN74121_c0_g1
TRINITY_DN6292_c0_g1
TRINITY_DN86204_c0_g1
TRINITY_DN86253_c0_g1
TRINITY_DN86299_c0_g1
TRINITY_DN26452_c0_g2
TRINITY_DN26452_c1_g1
TRINITY_DN82496_c0_g1
TRINITY_DN82420_c0_g1
TRINITY_DN82410_c0_g1
TRINITY_DN96559_c0_g1
TRINITY_DN96593_c0_g1
TRINITY_DN51548_c0_g1
TRINITY_DN51512_c0_g1
TRINITY_DN51567_c0_g2
TRINITY_DN51507_c3_g1
TRINITY_DN51570_c2_g1
TRINITY_DN51570_c4_g1
TRINITY_DN51575_c1_g1
TRINITY_DN51562_c0_g1
TRINITY_DN51525_c2_g1
TRINITY_DN51528_c2_g1
TRINITY_DN72152_c0_g1
TRINITY_DN72179_c0_g1
TRINITY_DN72134_c0_g1
TRINITY_DN72147_c0_g1
TRINITY_DN58114_c0_g1
TRINITY_DN58147_c0_g1
TRINITY_DN58175_c0_g1
TRINITY_DN12253_c0_g1
TRINITY_DN12236_c0_g1
TRINITY_DN12297_c0_g1
TRINITY_DN43650_c0_g1
TRINITY_DN43628_c0_g1
TRINITY_DN43640_c0_g1
TRINITY_DN43658_c0_g1
TRINITY_DN43683_c0_g1
TRINITY_DN43622_c0_g1
TRINITY_DN43660_c0_g1
TRINITY_DN43611_c0_g1
TRINITY_DN43623_c0_g1
TRINITY_DN43620_c0_g1
TRINITY_DN43647_c0_g1
TRINITY_DN42149_c2_g1
TRINITY_DN42132_c0_g1
TRINITY_DN42181_c0_g1
TRINITY_DN42105_c0_g1
TRINITY_DN42129_c0_g3
TRINITY_DN42189_c0_g1
TRINITY_DN4980_c0_g1
TRINITY_DN4916_c0_g1
TRINITY_DN93935_c0_g1
TRINITY_DN26305_c0_g1
TRINITY_DN26317_c0_g1
TRINITY_DN26384_c0_g1
TRINITY_DN26328_c0_g1
TRINITY_DN1174_c0_g1
TRINITY_DN1197_c0_g1
TRINITY_DN1193_c0_g1
TRINITY_DN53005_c0_g1
TRINITY_DN69489_c0_g1
TRINITY_DN69452_c0_g1
TRINITY_DN69484_c0_g1
TRINITY_DN91069_c0_g1
TRINITY_DN91067_c0_g1
TRINITY_DN91047_c0_g1
TRINITY_DN22345_c0_g1
TRINITY_DN71066_c0_g1
TRINITY_DN44731_c1_g1
TRINITY_DN44758_c0_g1
TRINITY_DN44769_c0_g1
TRINITY_DN44717_c0_g1
TRINITY_DN44724_c0_g1
TRINITY_DN76336_c0_g1
TRINITY_DN76318_c0_g1
TRINITY_DN76329_c0_g1
TRINITY_DN76320_c0_g1
TRINITY_DN65295_c0_g1
TRINITY_DN65290_c0_g1
TRINITY_DN65274_c0_g1
TRINITY_DN68767_c0_g1
TRINITY_DN68744_c0_g1
TRINITY_DN68799_c0_g1
TRINITY_DN64796_c0_g1
TRINITY_DN64744_c0_g1
TRINITY_DN6308_c0_g1
TRINITY_DN6385_c0_g1
TRINITY_DN90937_c0_g1
TRINITY_DN90900_c0_g1
TRINITY_DN90950_c0_g1
TRINITY_DN54236_c0_g1
TRINITY_DN54210_c0_g1
TRINITY_DN54219_c0_g1
TRINITY_DN54237_c0_g1
TRINITY_DN54295_c0_g1
TRINITY_DN54217_c0_g1
TRINITY_DN54224_c0_g1
TRINITY_DN54283_c0_g1
TRINITY_DN71636_c0_g1
TRINITY_DN90515_c0_g1
TRINITY_DN90579_c0_g1
TRINITY_DN66971_c0_g1
TRINITY_DN85334_c0_g1
TRINITY_DN85359_c0_g1
TRINITY_DN85394_c0_g1
TRINITY_DN39022_c0_g1
TRINITY_DN39085_c0_g3
TRINITY_DN39067_c0_g1
TRINITY_DN39012_c1_g1
TRINITY_DN39042_c0_g1
TRINITY_DN39027_c0_g1
TRINITY_DN39027_c1_g2
TRINITY_DN39044_c0_g1
TRINITY_DN14816_c0_g1
TRINITY_DN14897_c0_g1
TRINITY_DN33326_c0_g1
TRINITY_DN33368_c0_g1
TRINITY_DN33315_c0_g1
TRINITY_DN20797_c0_g1
TRINITY_DN20773_c0_g1
TRINITY_DN20735_c0_g1
TRINITY_DN20718_c0_g1
TRINITY_DN20736_c0_g1
TRINITY_DN45462_c0_g2
TRINITY_DN45415_c0_g1
TRINITY_DN45468_c0_g1
TRINITY_DN45455_c0_g1
TRINITY_DN45480_c1_g1
TRINITY_DN45451_c1_g2
TRINITY_DN45424_c0_g2
TRINITY_DN45431_c3_g1
TRINITY_DN45422_c1_g1
TRINITY_DN78369_c0_g1
TRINITY_DN78330_c0_g1
TRINITY_DN78341_c0_g1
TRINITY_DN7873_c0_g1
TRINITY_DN57890_c0_g1
TRINITY_DN57899_c0_g1
TRINITY_DN11910_c0_g1
TRINITY_DN11927_c0_g1
TRINITY_DN11942_c0_g1
TRINITY_DN73888_c0_g1
TRINITY_DN73856_c0_g1
TRINITY_DN73863_c0_g1
TRINITY_DN40108_c0_g1
TRINITY_DN40178_c0_g1
TRINITY_DN40147_c0_g1
TRINITY_DN40163_c0_g1
TRINITY_DN40167_c0_g1
TRINITY_DN40169_c0_g1
TRINITY_DN40151_c0_g1
TRINITY_DN40191_c0_g1
TRINITY_DN89516_c0_g1
TRINITY_DN89517_c0_g1
TRINITY_DN89572_c0_g1
TRINITY_DN89500_c0_g1
TRINITY_DN57710_c0_g1
TRINITY_DN73983_c0_g1
TRINITY_DN73979_c0_g1
TRINITY_DN73947_c0_g1
TRINITY_DN73985_c0_g1
TRINITY_DN32676_c0_g1
TRINITY_DN32697_c0_g1
TRINITY_DN35588_c0_g1
TRINITY_DN35509_c1_g1
TRINITY_DN35551_c0_g1
TRINITY_DN27038_c0_g1
TRINITY_DN27059_c0_g1
TRINITY_DN27092_c0_g1
TRINITY_DN27018_c0_g1
TRINITY_DN27016_c0_g1
TRINITY_DN27056_c0_g1
TRINITY_DN90209_c0_g1
TRINITY_DN90203_c0_g1
TRINITY_DN90268_c0_g1
TRINITY_DN90208_c0_g1
TRINITY_DN30653_c0_g1
TRINITY_DN44202_c1_g1
TRINITY_DN44265_c2_g1
TRINITY_DN44243_c0_g1
TRINITY_DN44266_c0_g2
TRINITY_DN44204_c6_g2
TRINITY_DN44248_c0_g1
TRINITY_DN44230_c7_g2
TRINITY_DN44230_c7_g3
TRINITY_DN44230_c8_g1
TRINITY_DN44230_c10_g7
TRINITY_DN44253_c0_g1
TRINITY_DN44233_c0_g1
TRINITY_DN44212_c0_g1
TRINITY_DN44242_c0_g1
TRINITY_DN44260_c0_g1
TRINITY_DN44279_c0_g1
TRINITY_DN1924_c0_g1
TRINITY_DN1921_c0_g1
TRINITY_DN1986_c0_g1
TRINITY_DN1976_c0_g1
TRINITY_DN95025_c0_g1
TRINITY_DN95073_c0_g1
TRINITY_DN95014_c0_g1
TRINITY_DN95080_c0_g1
TRINITY_DN95003_c0_g1
TRINITY_DN70130_c0_g1
TRINITY_DN70195_c0_g1
TRINITY_DN70113_c0_g1
TRINITY_DN45338_c0_g1
TRINITY_DN45338_c2_g2
TRINITY_DN45385_c0_g1
TRINITY_DN45360_c1_g1
TRINITY_DN45369_c0_g1
TRINITY_DN45340_c1_g1
TRINITY_DN45388_c0_g1
TRINITY_DN45353_c0_g1
TRINITY_DN45352_c0_g1
TRINITY_DN45354_c1_g1
TRINITY_DN45375_c1_g2
TRINITY_DN91611_c0_g1
TRINITY_DN34820_c0_g1
TRINITY_DN34851_c0_g1
TRINITY_DN34846_c0_g1
TRINITY_DN34867_c0_g1
TRINITY_DN34822_c1_g2
TRINITY_DN34852_c0_g1
TRINITY_DN64985_c0_g1
TRINITY_DN64951_c0_g1
TRINITY_DN9029_c0_g1
TRINITY_DN9096_c0_g1
TRINITY_DN9005_c0_g1
TRINITY_DN9010_c0_g1
TRINITY_DN9066_c0_g1
TRINITY_DN97144_c0_g1
TRINITY_DN56841_c0_g1
TRINITY_DN56829_c0_g1
TRINITY_DN56809_c0_g1
TRINITY_DN56871_c0_g1
TRINITY_DN59749_c0_g1
TRINITY_DN59760_c0_g1
TRINITY_DN11269_c0_g1
TRINITY_DN74666_c0_g1
TRINITY_DN39300_c0_g1
TRINITY_DN39353_c0_g1
TRINITY_DN39353_c0_g2
TRINITY_DN39357_c0_g1
TRINITY_DN39365_c1_g1
TRINITY_DN39319_c0_g1
TRINITY_DN39337_c0_g1
TRINITY_DN39369_c0_g1
TRINITY_DN98015_c0_g1
TRINITY_DN824_c0_g1
TRINITY_DN874_c0_g1
TRINITY_DN828_c0_g1
TRINITY_DN873_c0_g1
TRINITY_DN34195_c0_g1
TRINITY_DN34188_c0_g1
TRINITY_DN85098_c0_g1
TRINITY_DN85000_c0_g1
TRINITY_DN85012_c0_g1
TRINITY_DN20501_c0_g1
TRINITY_DN20592_c0_g1
TRINITY_DN20532_c0_g1
TRINITY_DN1392_c0_g1
TRINITY_DN49744_c0_g3
TRINITY_DN49709_c0_g1
TRINITY_DN49757_c0_g1
TRINITY_DN49726_c2_g1
TRINITY_DN49726_c3_g2
TRINITY_DN49726_c4_g1
TRINITY_DN49735_c1_g1
TRINITY_DN49747_c1_g2
TRINITY_DN49749_c0_g3
TRINITY_DN49784_c0_g1
TRINITY_DN35384_c0_g1
TRINITY_DN35358_c0_g1
TRINITY_DN35315_c0_g1
TRINITY_DN35301_c0_g1
TRINITY_DN35309_c0_g1
TRINITY_DN35329_c0_g1
TRINITY_DN30522_c0_g1
TRINITY_DN30557_c0_g1
TRINITY_DN98680_c0_g1
TRINITY_DN10873_c0_g1
TRINITY_DN10884_c0_g1
TRINITY_DN34928_c1_g1
TRINITY_DN34900_c0_g1
TRINITY_DN34931_c0_g1
TRINITY_DN34912_c0_g1
TRINITY_DN34979_c0_g1
TRINITY_DN34920_c0_g1
TRINITY_DN34920_c0_g2
TRINITY_DN11150_c0_g1
TRINITY_DN11142_c0_g1
TRINITY_DN60230_c0_g1
TRINITY_DN60266_c0_g1
TRINITY_DN65523_c0_g1
TRINITY_DN65515_c0_g1
TRINITY_DN65528_c0_g1
TRINITY_DN65540_c0_g1
TRINITY_DN24106_c0_g1
TRINITY_DN24142_c0_g1
TRINITY_DN6114_c0_g1
TRINITY_DN6115_c0_g1
TRINITY_DN19152_c0_g1
TRINITY_DN19194_c0_g1
TRINITY_DN83194_c0_g1
TRINITY_DN83161_c0_g1
TRINITY_DN83113_c0_g1
TRINITY_DN41450_c0_g1
TRINITY_DN41414_c0_g1
TRINITY_DN41475_c0_g1
TRINITY_DN41452_c0_g2
TRINITY_DN41417_c1_g1
TRINITY_DN41474_c0_g1
TRINITY_DN45145_c1_g2
TRINITY_DN45131_c0_g2
TRINITY_DN45125_c0_g1
TRINITY_DN45128_c0_g1
TRINITY_DN45174_c0_g1
TRINITY_DN45110_c0_g1
TRINITY_DN45102_c0_g1
TRINITY_DN45123_c0_g1
TRINITY_DN45152_c0_g2
TRINITY_DN45152_c0_g1
TRINITY_DN45152_c0_g4
TRINITY_DN45140_c0_g2
TRINITY_DN45154_c0_g2
TRINITY_DN45154_c0_g4
TRINITY_DN45154_c0_g1
TRINITY_DN45103_c0_g1
TRINITY_DN77255_c0_g1
TRINITY_DN77239_c0_g1
TRINITY_DN77226_c0_g1
TRINITY_DN50200_c0_g1
TRINITY_DN50200_c7_g1
TRINITY_DN50200_c7_g2
TRINITY_DN50293_c0_g1
TRINITY_DN50237_c4_g1
TRINITY_DN50213_c2_g3
TRINITY_DN50213_c4_g2
TRINITY_DN50213_c4_g1
TRINITY_DN50270_c0_g2
TRINITY_DN50271_c1_g2
TRINITY_DN50263_c2_g1
TRINITY_DN50286_c4_g2
TRINITY_DN50220_c0_g2
TRINITY_DN50220_c0_g3
TRINITY_DN50252_c6_g1
TRINITY_DN50228_c2_g1
TRINITY_DN50202_c0_g2
TRINITY_DN85475_c0_g1
TRINITY_DN85426_c0_g1
TRINITY_DN85407_c0_g1
TRINITY_DN6815_c0_g1
TRINITY_DN6852_c0_g1
TRINITY_DN21584_c0_g1
TRINITY_DN28876_c0_g1
TRINITY_DN28823_c0_g1
TRINITY_DN28847_c0_g1
TRINITY_DN28841_c0_g1
TRINITY_DN28807_c0_g1
TRINITY_DN75199_c0_g1
TRINITY_DN75187_c0_g1
TRINITY_DN12748_c0_g1
TRINITY_DN12781_c0_g1
TRINITY_DN12753_c0_g1
TRINITY_DN12723_c0_g1
TRINITY_DN40549_c1_g1
TRINITY_DN40551_c0_g1
TRINITY_DN40538_c0_g1
TRINITY_DN40541_c0_g1
TRINITY_DN40592_c0_g1
TRINITY_DN40506_c0_g1
TRINITY_DN40566_c0_g2
TRINITY_DN90367_c0_g1
TRINITY_DN90315_c0_g1
TRINITY_DN90387_c0_g1
TRINITY_DN23331_c0_g1
TRINITY_DN23368_c0_g1
TRINITY_DN23305_c0_g1
TRINITY_DN23307_c0_g1
TRINITY_DN23359_c0_g1
TRINITY_DN30385_c0_g1
TRINITY_DN30338_c1_g1
TRINITY_DN30383_c1_g1
TRINITY_DN30304_c0_g1
TRINITY_DN30345_c0_g1
TRINITY_DN30310_c1_g1
TRINITY_DN30346_c0_g1
TRINITY_DN19073_c0_g1
TRINITY_DN19009_c0_g1
TRINITY_DN19031_c0_g1
TRINITY_DN19053_c0_g1
TRINITY_DN19068_c0_g1
TRINITY_DN18588_c0_g1
TRINITY_DN18557_c0_g1
TRINITY_DN34472_c0_g1
TRINITY_DN34404_c0_g1
TRINITY_DN34422_c0_g1
TRINITY_DN34483_c0_g1
TRINITY_DN34445_c0_g1
TRINITY_DN34464_c0_g1
TRINITY_DN55821_c0_g1
TRINITY_DN55818_c0_g1
TRINITY_DN55856_c0_g1
TRINITY_DN33211_c0_g1
TRINITY_DN33206_c0_g1
TRINITY_DN33258_c0_g1
TRINITY_DN33258_c0_g3
TRINITY_DN99046_c0_g1
TRINITY_DN87965_c0_g1
TRINITY_DN87940_c0_g1
TRINITY_DN87983_c0_g1
TRINITY_DN45859_c0_g1
TRINITY_DN45879_c1_g1
TRINITY_DN45877_c1_g3
TRINITY_DN45814_c0_g1
TRINITY_DN45847_c0_g1
TRINITY_DN45889_c2_g1
TRINITY_DN45889_c3_g1
TRINITY_DN45889_c3_g2
TRINITY_DN45850_c1_g1
TRINITY_DN45850_c2_g1
TRINITY_DN45862_c1_g1
TRINITY_DN45845_c2_g1
TRINITY_DN23291_c0_g1
TRINITY_DN23200_c0_g1
TRINITY_DN23200_c0_g2
TRINITY_DN23218_c0_g1
TRINITY_DN23271_c0_g2
TRINITY_DN29095_c0_g1
TRINITY_DN30150_c0_g1
TRINITY_DN30128_c1_g1
TRINITY_DN30187_c0_g1
TRINITY_DN30115_c0_g1
TRINITY_DN79658_c0_g1
TRINITY_DN18282_c0_g1
TRINITY_DN18229_c0_g1
TRINITY_DN18231_c0_g1
TRINITY_DN18205_c0_g1
TRINITY_DN95565_c0_g1
TRINITY_DN95512_c0_g1
TRINITY_DN86166_c0_g1
TRINITY_DN92474_c0_g1
TRINITY_DN65652_c0_g1
TRINITY_DN65640_c0_g1
TRINITY_DN65604_c0_g1
TRINITY_DN65655_c0_g1
TRINITY_DN24574_c0_g1
TRINITY_DN47942_c0_g2
TRINITY_DN47943_c2_g1
TRINITY_DN47927_c1_g1
TRINITY_DN47931_c0_g1
TRINITY_DN47931_c0_g2
TRINITY_DN47922_c0_g1
TRINITY_DN35144_c0_g1
TRINITY_DN35150_c0_g1
TRINITY_DN35180_c0_g1
TRINITY_DN35187_c0_g1
TRINITY_DN35181_c0_g1
TRINITY_DN35131_c0_g1
TRINITY_DN96198_c0_g1
TRINITY_DN17457_c0_g1
TRINITY_DN17441_c0_g1
TRINITY_DN95725_c0_g1
TRINITY_DN95765_c0_g1
TRINITY_DN95787_c0_g1
TRINITY_DN95786_c0_g1
TRINITY_DN95741_c0_g1
TRINITY_DN23697_c0_g1
TRINITY_DN23663_c0_g1
TRINITY_DN43587_c0_g2
TRINITY_DN43567_c0_g1
TRINITY_DN43591_c0_g1
TRINITY_DN43590_c0_g1
TRINITY_DN43557_c0_g1
TRINITY_DN43570_c0_g2
TRINITY_DN43570_c0_g1
TRINITY_DN43511_c1_g2
TRINITY_DN43511_c1_g1
TRINITY_DN72062_c0_g1
TRINITY_DN13376_c0_g1
TRINITY_DN80901_c0_g1
TRINITY_DN80912_c0_g1
TRINITY_DN80979_c0_g1
TRINITY_DN80987_c0_g1
TRINITY_DN80917_c0_g1
TRINITY_DN65892_c0_g1
TRINITY_DN65868_c0_g1
TRINITY_DN65814_c0_g1
TRINITY_DN22027_c0_g1
TRINITY_DN22091_c0_g1
TRINITY_DN35983_c0_g1
TRINITY_DN35993_c0_g1
TRINITY_DN35919_c0_g1
TRINITY_DN35930_c0_g2
TRINITY_DN35916_c0_g1
TRINITY_DN35908_c0_g1
TRINITY_DN53211_c0_g1
TRINITY_DN53292_c0_g1
TRINITY_DN53239_c0_g1
TRINITY_DN53255_c0_g1
TRINITY_DN53261_c0_g1
TRINITY_DN13702_c0_g1
TRINITY_DN13728_c0_g1
TRINITY_DN13748_c0_g1
TRINITY_DN638_c0_g1
TRINITY_DN654_c0_g1
TRINITY_DN97815_c0_g1
TRINITY_DN97840_c0_g1
TRINITY_DN4200_c0_g1
TRINITY_DN4271_c0_g1
TRINITY_DN28429_c0_g1
TRINITY_DN7363_c0_g1
TRINITY_DN7349_c0_g1
TRINITY_DN7398_c0_g1
TRINITY_DN59319_c0_g1
TRINITY_DN74472_c0_g1
TRINITY_DN74416_c0_g1
TRINITY_DN74494_c0_g1
TRINITY_DN86415_c0_g1
TRINITY_DN68068_c0_g1
TRINITY_DN79243_c0_g1
TRINITY_DN46242_c0_g1
TRINITY_DN46265_c1_g1
TRINITY_DN46214_c1_g2
TRINITY_DN46216_c0_g1
TRINITY_DN46272_c0_g1
TRINITY_DN46274_c0_g1
TRINITY_DN46250_c0_g1
TRINITY_DN46240_c0_g1
TRINITY_DN46281_c0_g1
TRINITY_DN98229_c0_g1
TRINITY_DN6593_c0_g1
TRINITY_DN81419_c0_g1
TRINITY_DN81491_c0_g1
TRINITY_DN81488_c0_g1
TRINITY_DN81422_c0_g1
TRINITY_DN81400_c0_g1
TRINITY_DN81459_c0_g1
TRINITY_DN23702_c0_g1
TRINITY_DN23787_c0_g1
TRINITY_DN23762_c0_g1
TRINITY_DN22567_c0_g1
TRINITY_DN22560_c0_g1
TRINITY_DN22595_c0_g1
TRINITY_DN22573_c0_g1
TRINITY_DN60334_c0_g1
TRINITY_DN2720_c0_g1
TRINITY_DN2731_c0_g1
TRINITY_DN2743_c0_g1
TRINITY_DN2790_c0_g1
TRINITY_DN33188_c0_g1
TRINITY_DN33159_c0_g1
TRINITY_DN33193_c0_g1
TRINITY_DN33140_c0_g1
TRINITY_DN33177_c0_g1
TRINITY_DN33116_c0_g1
TRINITY_DN50314_c3_g2
TRINITY_DN50332_c0_g1
TRINITY_DN50301_c1_g1
TRINITY_DN50376_c0_g1
TRINITY_DN50358_c1_g1
TRINITY_DN50347_c0_g1
TRINITY_DN50387_c0_g1
TRINITY_DN50371_c0_g1
TRINITY_DN50371_c1_g2
TRINITY_DN50305_c3_g3
TRINITY_DN50357_c4_g2
TRINITY_DN50357_c4_g5
TRINITY_DN50357_c4_g11
TRINITY_DN50386_c5_g2
TRINITY_DN50386_c5_g1
TRINITY_DN50386_c5_g3
TRINITY_DN50331_c5_g2
TRINITY_DN27121_c0_g1
TRINITY_DN27193_c0_g1
TRINITY_DN27187_c0_g1
TRINITY_DN27128_c0_g1
TRINITY_DN27165_c0_g1
TRINITY_DN27186_c0_g1
TRINITY_DN16369_c0_g1
TRINITY_DN16384_c0_g1
TRINITY_DN16318_c0_g1
TRINITY_DN5357_c0_g1
TRINITY_DN5330_c0_g1
TRINITY_DN5300_c0_g1
TRINITY_DN82999_c0_g1
TRINITY_DN82932_c0_g1
TRINITY_DN83815_c0_g1
TRINITY_DN83873_c0_g1
TRINITY_DN25792_c0_g1
TRINITY_DN25707_c0_g1
TRINITY_DN91553_c0_g1
TRINITY_DN91583_c0_g1
TRINITY_DN91533_c0_g1
TRINITY_DN91570_c0_g1
TRINITY_DN91501_c0_g1
TRINITY_DN73621_c0_g1
TRINITY_DN73620_c0_g1
TRINITY_DN73605_c0_g1
TRINITY_DN90826_c0_g1
TRINITY_DN19539_c0_g1
TRINITY_DN19563_c0_g1
TRINITY_DN78213_c0_g1
TRINITY_DN78239_c0_g1
TRINITY_DN52205_c0_g1
TRINITY_DN52205_c1_g1
TRINITY_DN52287_c0_g1
TRINITY_DN52291_c2_g1
TRINITY_DN52256_c5_g2
TRINITY_DN52277_c7_g1
TRINITY_DN52277_c7_g2
TRINITY_DN52273_c1_g1
TRINITY_DN52245_c1_g5
TRINITY_DN52295_c2_g1
TRINITY_DN29995_c0_g1
TRINITY_DN29993_c0_g1
TRINITY_DN29924_c0_g1
TRINITY_DN29998_c0_g1
TRINITY_DN39211_c0_g1
TRINITY_DN39289_c0_g1
TRINITY_DN39259_c0_g1
TRINITY_DN39220_c0_g1
TRINITY_DN39255_c0_g1
TRINITY_DN39244_c0_g1
TRINITY_DN99213_c0_g1
TRINITY_DN99269_c0_g1
TRINITY_DN99287_c0_g1
TRINITY_DN99294_c0_g1
TRINITY_DN99249_c0_g1
TRINITY_DN99241_c0_g1
TRINITY_DN49906_c3_g1
TRINITY_DN49961_c2_g1
TRINITY_DN49998_c8_g1
TRINITY_DN49937_c0_g3
TRINITY_DN49991_c0_g3
TRINITY_DN49993_c0_g1
TRINITY_DN49941_c0_g3
TRINITY_DN63283_c0_g1
TRINITY_DN63232_c0_g1
TRINITY_DN16965_c0_g1
TRINITY_DN16952_c0_g1
TRINITY_DN16931_c0_g1
TRINITY_DN16947_c0_g1
TRINITY_DN5685_c0_g1
TRINITY_DN5678_c0_g1
TRINITY_DN5682_c0_g1
TRINITY_DN5607_c0_g1
TRINITY_DN5656_c0_g1
TRINITY_DN31823_c0_g1
TRINITY_DN31853_c0_g1
TRINITY_DN87741_c0_g1
TRINITY_DN87755_c0_g1
TRINITY_DN73352_c0_g1
TRINITY_DN73380_c0_g1
TRINITY_DN73366_c0_g1
TRINITY_DN73366_c1_g1
TRINITY_DN86929_c0_g1
TRINITY_DN86990_c0_g1
TRINITY_DN86927_c0_g1
TRINITY_DN86970_c0_g1
TRINITY_DN18482_c0_g1
TRINITY_DN18493_c0_g1
TRINITY_DN18400_c0_g1
TRINITY_DN61663_c0_g1
TRINITY_DN4730_c0_g1
TRINITY_DN4778_c0_g1
TRINITY_DN79939_c0_g1
TRINITY_DN79988_c0_g1
TRINITY_DN79956_c0_g1
TRINITY_DN79924_c0_g1
TRINITY_DN51484_c1_g2
TRINITY_DN51484_c2_g1
TRINITY_DN51484_c2_g3
TRINITY_DN51498_c0_g1
TRINITY_DN51457_c0_g2
TRINITY_DN51499_c0_g2
TRINITY_DN51496_c1_g2
TRINITY_DN49351_c2_g1
TRINITY_DN49369_c0_g1
TRINITY_DN49319_c3_g2
TRINITY_DN49326_c5_g1
TRINITY_DN49304_c1_g1
TRINITY_DN49304_c1_g2
TRINITY_DN49304_c1_g3
TRINITY_DN49344_c0_g2
TRINITY_DN49397_c0_g2
TRINITY_DN49394_c2_g3
TRINITY_DN49354_c0_g1
TRINITY_DN49388_c2_g2
TRINITY_DN19814_c0_g1
TRINITY_DN19885_c0_g1
TRINITY_DN19845_c0_g1
TRINITY_DN54719_c0_g1
TRINITY_DN54445_c0_g1
TRINITY_DN22757_c0_g1
TRINITY_DN22772_c0_g1
TRINITY_DN22798_c0_g1
TRINITY_DN22735_c0_g1
TRINITY_DN8561_c0_g1
TRINITY_DN8559_c0_g1
TRINITY_DN27847_c0_g1
TRINITY_DN27812_c0_g1
TRINITY_DN27855_c0_g1
TRINITY_DN27824_c0_g1
TRINITY_DN95197_c0_g1
TRINITY_DN95194_c0_g1
TRINITY_DN95113_c0_g1
TRINITY_DN19494_c0_g1
TRINITY_DN19413_c0_g1
TRINITY_DN19409_c0_g1
TRINITY_DN86680_c0_g1
TRINITY_DN86613_c0_g1
TRINITY_DN86637_c0_g1
TRINITY_DN86647_c0_g1
TRINITY_DN86627_c0_g1
TRINITY_DN45561_c0_g1
TRINITY_DN45569_c3_g1
TRINITY_DN45599_c0_g2
TRINITY_DN45513_c0_g2
TRINITY_DN45584_c0_g1
TRINITY_DN45553_c7_g1
TRINITY_DN45549_c0_g1
TRINITY_DN45549_c0_g2
TRINITY_DN45577_c0_g1
TRINITY_DN45575_c2_g1
TRINITY_DN45533_c0_g1
TRINITY_DN36123_c0_g1
TRINITY_DN36101_c0_g1
TRINITY_DN36139_c0_g2
TRINITY_DN36148_c0_g1
TRINITY_DN36149_c0_g1
TRINITY_DN36153_c1_g2
TRINITY_DN68939_c0_g1
TRINITY_DN68917_c0_g1
TRINITY_DN98100_c0_g1
TRINITY_DN98112_c0_g1
TRINITY_DN98159_c0_g1
TRINITY_DN98167_c0_g1
TRINITY_DN98111_c0_g1
TRINITY_DN52806_c0_g1
TRINITY_DN52856_c0_g1
TRINITY_DN52893_c0_g1
TRINITY_DN52855_c0_g1
TRINITY_DN4864_c0_g1
TRINITY_DN4871_c0_g1
TRINITY_DN4824_c0_g1
TRINITY_DN4815_c0_g1
TRINITY_DN25618_c0_g1
TRINITY_DN25636_c0_g2
TRINITY_DN25645_c0_g1
TRINITY_DN71125_c0_g1
TRINITY_DN40763_c0_g1
TRINITY_DN40793_c0_g1
TRINITY_DN40799_c0_g1
TRINITY_DN40791_c0_g1
TRINITY_DN40716_c0_g1
TRINITY_DN40745_c0_g2
TRINITY_DN40713_c0_g1
TRINITY_DN40726_c0_g1
TRINITY_DN40722_c0_g1
TRINITY_DN40722_c0_g2
TRINITY_DN23452_c0_g1
TRINITY_DN23482_c0_g1
TRINITY_DN51010_c0_g1
TRINITY_DN51051_c0_g1
TRINITY_DN51053_c3_g1
TRINITY_DN51053_c4_g1
TRINITY_DN51053_c5_g1
TRINITY_DN51053_c5_g4
TRINITY_DN51060_c10_g1
TRINITY_DN51060_c10_g2
TRINITY_DN51005_c0_g1
TRINITY_DN51021_c0_g1
TRINITY_DN51022_c2_g1
TRINITY_DN51052_c1_g1
TRINITY_DN51052_c2_g1
TRINITY_DN94233_c0_g1
TRINITY_DN94270_c0_g1
TRINITY_DN49513_c0_g1
TRINITY_DN49598_c1_g1
TRINITY_DN49553_c0_g1
TRINITY_DN49566_c0_g1
TRINITY_DN49574_c0_g2
TRINITY_DN49596_c0_g2
TRINITY_DN49545_c0_g2
TRINITY_DN49545_c1_g2
TRINITY_DN49545_c1_g3
TRINITY_DN49530_c2_g2
TRINITY_DN49525_c2_g6
TRINITY_DN49515_c0_g1
TRINITY_DN49508_c3_g3
TRINITY_DN49519_c0_g1
TRINITY_DN76442_c0_g1
TRINITY_DN16658_c0_g1
TRINITY_DN16684_c0_g1
TRINITY_DN16675_c0_g1
TRINITY_DN94359_c0_g1
TRINITY_DN94330_c0_g1
TRINITY_DN94334_c0_g1
TRINITY_DN94398_c0_g1
TRINITY_DN80701_c0_g1
TRINITY_DN80718_c0_g1
TRINITY_DN80709_c0_g1
TRINITY_DN9848_c0_g1
TRINITY_DN64411_c0_g1
TRINITY_DN64439_c0_g1
TRINITY_DN64473_c0_g1
TRINITY_DN98349_c0_g1
TRINITY_DN98316_c0_g1
TRINITY_DN98340_c0_g1
TRINITY_DN52109_c0_g2
TRINITY_DN52187_c0_g2
TRINITY_DN52163_c1_g1
TRINITY_DN52111_c2_g1
TRINITY_DN52196_c1_g1
TRINITY_DN52119_c0_g5
TRINITY_DN52159_c0_g1
TRINITY_DN52157_c0_g1
TRINITY_DN52133_c1_g1
TRINITY_DN52133_c4_g2
TRINITY_DN52133_c7_g1
TRINITY_DN52133_c8_g5
TRINITY_DN52133_c16_g1
TRINITY_DN56087_c0_g1
TRINITY_DN56018_c0_g1
TRINITY_DN91258_c0_g1
TRINITY_DN91214_c0_g1
TRINITY_DN91298_c0_g1
TRINITY_DN56757_c0_g1
TRINITY_DN75549_c0_g1
TRINITY_DN22904_c0_g1
TRINITY_DN22991_c0_g1
TRINITY_DN22919_c0_g1
TRINITY_DN69861_c0_g1
TRINITY_DN69876_c0_g1
TRINITY_DN18163_c0_g1
TRINITY_DN18143_c0_g1
TRINITY_DN48860_c0_g1
TRINITY_DN48815_c0_g2
TRINITY_DN48886_c0_g1
TRINITY_DN48877_c0_g1
TRINITY_DN48808_c2_g2
TRINITY_DN48808_c3_g2
TRINITY_DN48898_c0_g1
TRINITY_DN48875_c1_g1
TRINITY_DN48801_c0_g1
TRINITY_DN64841_c0_g1
TRINITY_DN81337_c0_g1
TRINITY_DN58030_c0_g1
TRINITY_DN58061_c0_g1
TRINITY_DN51301_c2_g2
TRINITY_DN51319_c0_g2
TRINITY_DN51364_c3_g1
TRINITY_DN51308_c2_g3
TRINITY_DN51314_c2_g2
TRINITY_DN51360_c0_g3
TRINITY_DN51360_c0_g4
TRINITY_DN51360_c0_g2
TRINITY_DN51339_c0_g1
TRINITY_DN51397_c0_g5
TRINITY_DN51393_c0_g2
TRINITY_DN51374_c0_g1
TRINITY_DN68151_c0_g1
TRINITY_DN68137_c0_g1
TRINITY_DN68165_c0_g1
TRINITY_DN68104_c0_g1
TRINITY_DN44478_c0_g1
TRINITY_DN44463_c0_g1
TRINITY_DN44469_c0_g2
TRINITY_DN44448_c0_g1
TRINITY_DN44438_c0_g1
TRINITY_DN44429_c0_g1
TRINITY_DN44414_c0_g1
TRINITY_DN44435_c0_g1
TRINITY_DN44440_c0_g1
TRINITY_DN6704_c0_g1
TRINITY_DN6718_c0_g1
TRINITY_DN6713_c0_g1
TRINITY_DN6793_c0_g1
TRINITY_DN6720_c0_g1
TRINITY_DN6787_c0_g1
TRINITY_DN6777_c0_g1
TRINITY_DN6797_c0_g1
TRINITY_DN85916_c0_g1
TRINITY_DN85967_c0_g1
TRINITY_DN85944_c0_g1
TRINITY_DN85214_c0_g1
TRINITY_DN85202_c0_g1
TRINITY_DN85215_c0_g1
TRINITY_DN50056_c3_g1
TRINITY_DN50070_c0_g1
TRINITY_DN50028_c1_g1
TRINITY_DN50071_c0_g1
TRINITY_DN50012_c1_g2
TRINITY_DN50012_c1_g3
TRINITY_DN50012_c2_g2
TRINITY_DN50064_c0_g3
TRINITY_DN50007_c0_g1
TRINITY_DN50083_c0_g1
TRINITY_DN50077_c1_g1
TRINITY_DN66555_c0_g1
TRINITY_DN66536_c0_g1
TRINITY_DN25077_c0_g1
TRINITY_DN25036_c0_g1
TRINITY_DN25094_c0_g1
TRINITY_DN21425_c0_g1
TRINITY_DN9627_c0_g1
TRINITY_DN9614_c0_g1
TRINITY_DN9623_c0_g1
TRINITY_DN10029_c0_g1
TRINITY_DN10019_c0_g1
TRINITY_DN10083_c0_g1
TRINITY_DN68807_c0_g1
TRINITY_DN68800_c0_g1
TRINITY_DN68881_c0_g1
TRINITY_DN68828_c0_g1
TRINITY_DN10340_c0_g1
TRINITY_DN10352_c0_g1
TRINITY_DN50147_c0_g1
TRINITY_DN50183_c1_g5
TRINITY_DN50168_c0_g4
TRINITY_DN50156_c0_g1
TRINITY_DN50119_c1_g1
TRINITY_DN50181_c3_g4
TRINITY_DN50135_c0_g1
TRINITY_DN48665_c0_g1
TRINITY_DN48665_c1_g1
TRINITY_DN48619_c0_g10
TRINITY_DN48619_c0_g11
TRINITY_DN48619_c0_g13
TRINITY_DN48601_c0_g1
TRINITY_DN48675_c2_g1
TRINITY_DN48620_c0_g2
TRINITY_DN48634_c0_g3
TRINITY_DN48670_c0_g1
TRINITY_DN48614_c1_g5
TRINITY_DN48635_c4_g1
TRINITY_DN72371_c0_g1
TRINITY_DN72380_c0_g1
TRINITY_DN72395_c0_g1
TRINITY_DN73127_c0_g1
TRINITY_DN73190_c0_g1
TRINITY_DN73174_c0_g1
TRINITY_DN73100_c0_g1
TRINITY_DN35076_c0_g1
TRINITY_DN35023_c0_g1
TRINITY_DN35009_c0_g1
TRINITY_DN35000_c0_g1
TRINITY_DN35072_c0_g1
TRINITY_DN37572_c0_g1
TRINITY_DN37513_c0_g1
TRINITY_DN37514_c1_g1
TRINITY_DN9290_c0_g1
TRINITY_DN46794_c1_g3
TRINITY_DN46787_c0_g1
TRINITY_DN46752_c0_g2
TRINITY_DN46774_c3_g1
TRINITY_DN46760_c0_g1
TRINITY_DN46791_c0_g2
TRINITY_DN46744_c1_g1
TRINITY_DN46726_c0_g1
TRINITY_DN46718_c7_g4
TRINITY_DN46719_c0_g1
TRINITY_DN73439_c0_g1
TRINITY_DN12893_c1_g1
TRINITY_DN88627_c0_g1
TRINITY_DN88654_c0_g1
TRINITY_DN88600_c0_g1
TRINITY_DN88619_c0_g1
TRINITY_DN88682_c0_g1
TRINITY_DN31589_c0_g1
TRINITY_DN31521_c0_g1
TRINITY_DN31570_c1_g1
TRINITY_DN31554_c0_g1
TRINITY_DN31554_c1_g1
TRINITY_DN31550_c0_g1
TRINITY_DN31551_c0_g1
TRINITY_DN42057_c0_g1
TRINITY_DN42076_c1_g1
TRINITY_DN42045_c0_g1
TRINITY_DN42847_c0_g1
TRINITY_DN42832_c0_g2
TRINITY_DN42871_c0_g1
TRINITY_DN42821_c0_g1
TRINITY_DN74784_c0_g1
TRINITY_DN74713_c0_g1
TRINITY_DN58813_c0_g1
TRINITY_DN58831_c0_g1
TRINITY_DN1050_c0_g1
TRINITY_DN85553_c0_g1
TRINITY_DN26103_c0_g1
TRINITY_DN26153_c0_g1
TRINITY_DN26142_c0_g1
TRINITY_DN26162_c0_g1
TRINITY_DN26159_c0_g2
TRINITY_DN26122_c0_g1
TRINITY_DN49065_c2_g2
TRINITY_DN49028_c2_g1
TRINITY_DN49010_c0_g1
TRINITY_DN49010_c0_g2
TRINITY_DN49026_c0_g1
TRINITY_DN49026_c2_g3
TRINITY_DN49051_c0_g3
TRINITY_DN49064_c0_g4
TRINITY_DN49060_c1_g2
TRINITY_DN49089_c1_g3
TRINITY_DN49036_c2_g1
TRINITY_DN49079_c0_g1
TRINITY_DN49098_c1_g1
TRINITY_DN49081_c0_g2
TRINITY_DN49049_c5_g1
TRINITY_DN49013_c0_g1
TRINITY_DN3896_c0_g1
TRINITY_DN3815_c0_g1
TRINITY_DN32308_c0_g1
TRINITY_DN32361_c0_g1
TRINITY_DN32353_c0_g1
TRINITY_DN32350_c0_g1
TRINITY_DN515_c0_g1
TRINITY_DN529_c0_g1
TRINITY_DN597_c0_g1
TRINITY_DN532_c0_g1
TRINITY_DN37075_c0_g1
TRINITY_DN37066_c0_g1
TRINITY_DN37025_c0_g1
TRINITY_DN37012_c1_g1
TRINITY_DN37004_c0_g1
TRINITY_DN89939_c0_g1
TRINITY_DN89914_c0_g1
TRINITY_DN89986_c0_g1
TRINITY_DN10784_c0_g1
TRINITY_DN57161_c0_g1
TRINITY_DN60986_c0_g1
TRINITY_DN60907_c0_g1
TRINITY_DN60922_c0_g1
TRINITY_DN67913_c0_g1
TRINITY_DN67938_c0_g1
TRINITY_DN91832_c0_g1
TRINITY_DN91823_c0_g1
TRINITY_DN91850_c0_g1
TRINITY_DN79883_c0_g1
TRINITY_DN79844_c0_g1
TRINITY_DN79854_c0_g1
TRINITY_DN26553_c0_g1
TRINITY_DN32445_c0_g1
TRINITY_DN32470_c0_g1
TRINITY_DN32444_c0_g1
TRINITY_DN32443_c0_g1
TRINITY_DN32497_c0_g1
TRINITY_DN32400_c0_g1
TRINITY_DN32499_c0_g1
TRINITY_DN92828_c0_g1
TRINITY_DN37699_c0_g1
TRINITY_DN37611_c0_g1
TRINITY_DN37644_c0_g1
TRINITY_DN37648_c0_g1
TRINITY_DN37609_c0_g1
TRINITY_DN88733_c0_g1
TRINITY_DN88755_c0_g1
TRINITY_DN88706_c0_g1
TRINITY_DN88783_c0_g1
TRINITY_DN88732_c0_g1
TRINITY_DN88723_c0_g1
TRINITY_DN41732_c0_g2
TRINITY_DN41742_c0_g1
TRINITY_DN41771_c0_g1
TRINITY_DN41701_c0_g1
TRINITY_DN41787_c0_g1
TRINITY_DN77140_c0_g1
TRINITY_DN77107_c0_g1
TRINITY_DN77121_c0_g1
TRINITY_DN7730_c0_g1
TRINITY_DN7729_c0_g1
TRINITY_DN83323_c0_g1
TRINITY_DN83340_c0_g1
TRINITY_DN83382_c0_g1
TRINITY_DN75600_c0_g1
TRINITY_DN36904_c0_g1
[truncated: 1,475 more rows]

## Sheet: Elements only in Swiss-Prot
Elements only in Swiss-Prot :
TRINITY_DN99826_c0_g1
TRINITY_DN72976_c0_g1
TRINITY_DN47635_c0_g1
TRINITY_DN3402_c0_g1
TRINITY_DN68526_c0_g1
TRINITY_DN68521_c0_g1
TRINITY_DN45224_c0_g3
TRINITY_DN45202_c0_g3
TRINITY_DN50420_c7_g6
TRINITY_DN50487_c3_g4
TRINITY_DN50439_c1_g3
TRINITY_DN43939_c0_g1
TRINITY_DN43913_c0_g4
TRINITY_DN43912_c0_g2
TRINITY_DN61019_c0_g1
TRINITY_DN5542_c0_g1
TRINITY_DN52048_c2_g1
TRINITY_DN52040_c4_g1
TRINITY_DN48753_c0_g3
TRINITY_DN82096_c0_g1
TRINITY_DN82058_c0_g1
TRINITY_DN56457_c0_g1
TRINITY_DN81728_c0_g1
TRINITY_DN50766_c1_g2
TRINITY_DN62068_c0_g1
TRINITY_DN70442_c0_g1
TRINITY_DN95331_c0_g1
TRINITY_DN20652_c0_g1
TRINITY_DN54025_c0_g1
TRINITY_DN40963_c1_g1
TRINITY_DN66787_c0_g1
TRINITY_DN84551_c0_g1
TRINITY_DN60482_c0_g1
TRINITY_DN60483_c0_g1
TRINITY_DN95949_c0_g1
TRINITY_DN53428_c0_g1
TRINITY_DN74831_c0_g1
TRINITY_DN74835_c0_g1
TRINITY_DN74813_c0_g1
TRINITY_DN25840_c0_g1
TRINITY_DN35745_c0_g1
TRINITY_DN14015_c0_g1
TRINITY_DN93328_c0_g1
TRINITY_DN69651_c0_g1
TRINITY_DN70339_c0_g1
TRINITY_DN44979_c0_g2
TRINITY_DN67275_c0_g1
TRINITY_DN47588_c0_g1
TRINITY_DN36622_c0_g1
TRINITY_DN28232_c0_g1
TRINITY_DN70762_c0_g1
TRINITY_DN22606_c0_g1
TRINITY_DN91404_c0_g1
TRINITY_DN74589_c0_g1
TRINITY_DN55344_c0_g1
TRINITY_DN53856_c0_g1
TRINITY_DN54697_c0_g1
TRINITY_DN88100_c0_g1
TRINITY_DN15119_c0_g1
TRINITY_DN19796_c0_g1
TRINITY_DN20804_c0_g1
TRINITY_DN20846_c0_g1
TRINITY_DN20881_c0_g1
TRINITY_DN39020_c0_g1
TRINITY_DN20712_c0_g1
TRINITY_DN78333_c0_g1
TRINITY_DN57861_c0_g1
TRINITY_DN30624_c0_g1
TRINITY_DN30624_c0_g2
TRINITY_DN44203_c0_g2
TRINITY_DN85043_c0_g1
TRINITY_DN20578_c0_g1
TRINITY_DN1307_c0_g1
TRINITY_DN49771_c1_g1
TRINITY_DN49703_c0_g2
TRINITY_DN49731_c6_g1
TRINITY_DN49734_c1_g2
TRINITY_DN30593_c0_g1
TRINITY_DN30568_c0_g1
TRINITY_DN34940_c0_g1
TRINITY_DN65542_c0_g1
TRINITY_DN24181_c0_g1
TRINITY_DN6101_c0_g1
TRINITY_DN83192_c0_g1
TRINITY_DN45193_c0_g1
TRINITY_DN50224_c1_g2
TRINITY_DN85495_c0_g1
TRINITY_DN6880_c0_g1
TRINITY_DN21542_c0_g1
TRINITY_DN21512_c0_g1
TRINITY_DN21541_c0_g1
TRINITY_DN75151_c0_g1
TRINITY_DN40577_c0_g1
TRINITY_DN23306_c0_g1
TRINITY_DN23374_c0_g2
TRINITY_DN34419_c0_g1
TRINITY_DN34407_c0_g1
TRINITY_DN33217_c0_g1
TRINITY_DN48644_c0_g4
TRINITY_DN73103_c0_g1
TRINITY_DN46750_c0_g2
TRINITY_DN31524_c0_g1
TRINITY_DN42896_c2_g1
TRINITY_DN74737_c0_g1
TRINITY_DN49062_c0_g3
TRINITY_DN49019_c0_g1
TRINITY_DN49050_c10_g4
TRINITY_DN79863_c0_g1
TRINITY_DN77154_c0_g1
TRINITY_DN65096_c0_g1
TRINITY_DN98476_c0_g1
TRINITY_DN20375_c0_g1
TRINITY_DN71711_c0_g1
TRINITY_DN46620_c0_g3
TRINITY_DN2112_c0_g1
TRINITY_DN81639_c0_g1
TRINITY_DN94888_c0_g1
TRINITY_DN43781_c0_g1
TRINITY_DN55078_c0_g1
TRINITY_DN88820_c0_g1
TRINITY_DN39888_c0_g1
TRINITY_DN39878_c0_g2
TRINITY_DN51874_c0_g1
TRINITY_DN97365_c0_g1
TRINITY_DN3363_c0_g1
TRINITY_DN34609_c0_g1
TRINITY_DN34678_c0_g1
TRINITY_DN12992_c0_g1
TRINITY_DN41555_c1_g2
TRINITY_DN90781_c0_g1
TRINITY_DN61106_c0_g1
TRINITY_DN67026_c1_g1
TRINITY_DN46157_c0_g1
TRINITY_DN3003_c0_g1
TRINITY_DN71392_c0_g1
TRINITY_DN76585_c0_g1
TRINITY_DN75086_c0_g1
TRINITY_DN87251_c0_g1
TRINITY_DN28777_c1_g1
TRINITY_DN28751_c0_g1
TRINITY_DN25285_c0_g1
TRINITY_DN25230_c0_g1
TRINITY_DN78663_c0_g1
TRINITY_DN45918_c0_g1
TRINITY_DN87616_c0_g1
TRINITY_DN9995_c0_g1
TRINITY_DN68294_c0_g1
TRINITY_DN18618_c0_g1
TRINITY_DN24682_c0_g1
TRINITY_DN17909_c0_g1
TRINITY_DN17931_c0_g2
TRINITY_DN34705_c0_g2
TRINITY_DN92391_c0_g1
TRINITY_DN81964_c0_g1
TRINITY_DN62147_c0_g1
TRINITY_DN72241_c0_g1
TRINITY_DN44632_c5_g3
TRINITY_DN37275_c0_g1
TRINITY_DN37259_c0_g1
TRINITY_DN47856_c1_g1
TRINITY_DN36396_c0_g1
TRINITY_DN52466_c2_g1
TRINITY_DN79074_c0_g1
TRINITY_DN32789_c0_g1
TRINITY_DN27479_c0_g1
TRINITY_DN38521_c0_g1
TRINITY_DN12347_c0_g1
TRINITY_DN45846_c0_g2
TRINITY_DN29022_c0_g1
TRINITY_DN30149_c0_g1
TRINITY_DN47904_c0_g1
TRINITY_DN47953_c0_g2
TRINITY_DN47918_c0_g1
TRINITY_DN47940_c0_g3
TRINITY_DN47935_c3_g3
TRINITY_DN96127_c0_g1
TRINITY_DN13937_c0_g1
TRINITY_DN80993_c0_g1
TRINITY_DN35976_c0_g1
TRINITY_DN35913_c0_g1
TRINITY_DN53294_c0_g1
TRINITY_DN624_c0_g1
TRINITY_DN645_c0_g1
TRINITY_DN7375_c1_g1
TRINITY_DN46252_c0_g2
TRINITY_DN23735_c0_g1
TRINITY_DN22530_c0_g1
TRINITY_DN50324_c6_g2
TRINITY_DN50302_c0_g5
TRINITY_DN82929_c0_g1
TRINITY_DN3680_c0_g1
TRINITY_DN90848_c0_g1
TRINITY_DN19584_c0_g1
TRINITY_DN52292_c3_g1
TRINITY_DN99243_c0_g1
TRINITY_DN49985_c1_g4
TRINITY_DN73347_c0_g1
TRINITY_DN86908_c0_g1
TRINITY_DN8352_c0_g1
TRINITY_DN51499_c0_g1
TRINITY_DN51411_c0_g1
TRINITY_DN101858_c0_g1
TRINITY_DN100505_c0_g1
TRINITY_DN100446_c0_g1
TRINITY_DN100623_c0_g1
TRINITY_DN100689_c0_g1
TRINITY_DN100824_c0_g1
TRINITY_DN100881_c0_g1
TRINITY_DN102004_c0_g1
TRINITY_DN100140_c0_g1
TRINITY_DN100124_c0_g1
TRINITY_DN28646_c0_g2
TRINITY_DN38050_c1_g1
TRINITY_DN36553_c0_g1
TRINITY_DN81288_c0_g1
TRINITY_DN87410_c0_g1
TRINITY_DN84184_c0_g1
TRINITY_DN36856_c0_g1
TRINITY_DN32568_c0_g1
TRINITY_DN24332_c0_g1
TRINITY_DN94684_c0_g1
TRINITY_DN10440_c0_g1
TRINITY_DN29175_c0_g1
TRINITY_DN57524_c0_g1
TRINITY_DN7244_c0_g1
TRINITY_DN7917_c0_g1
TRINITY_DN7991_c0_g1
TRINITY_DN71958_c0_g1
TRINITY_DN40872_c0_g1
TRINITY_DN1801_c0_g1
TRINITY_DN1521_c0_g1
TRINITY_DN1590_c0_g1
TRINITY_DN1532_c0_g1
TRINITY_DN27762_c0_g1
TRINITY_DN27789_c0_g1
TRINITY_DN94419_c0_g1
TRINITY_DN58768_c0_g1
TRINITY_DN194_c0_g1
TRINITY_DN18045_c0_g1
TRINITY_DN58260_c0_g1
TRINITY_DN67359_c0_g1
TRINITY_DN51220_c5_g1
TRINITY_DN44844_c0_g1
TRINITY_DN63514_c0_g1
TRINITY_DN78851_c0_g1
TRINITY_DN18930_c0_g1
TRINITY_DN56915_c0_g1
TRINITY_DN18812_c0_g1
TRINITY_DN51998_c1_g1
TRINITY_DN51975_c0_g1
TRINITY_DN51945_c0_g3
TRINITY_DN51515_c1_g5
TRINITY_DN51508_c1_g2
TRINITY_DN51539_c2_g3
TRINITY_DN51563_c1_g3
TRINITY_DN51503_c1_g2
TRINITY_DN72160_c0_g1
TRINITY_DN72138_c0_g1
TRINITY_DN69471_c0_g1
TRINITY_DN71092_c0_g1
TRINITY_DN44701_c0_g1
TRINITY_DN65239_c0_g1
TRINITY_DN64701_c0_g1
TRINITY_DN21377_c0_g1
TRINITY_DN40307_c0_g1
TRINITY_DN79107_c0_g1
TRINITY_DN47475_c0_g2
TRINITY_DN56541_c0_g1
TRINITY_DN32857_c0_g1
TRINITY_DN54577_c0_g1
TRINITY_DN51157_c0_g3
TRINITY_DN51162_c4_g4
TRINITY_DN40606_c0_g1
TRINITY_DN81157_c0_g1
TRINITY_DN59842_c0_g1
TRINITY_DN59826_c0_g1
TRINITY_DN93146_c0_g1
TRINITY_DN93135_c0_g1
TRINITY_DN93488_c0_g1
TRINITY_DN47365_c1_g1
TRINITY_DN47365_c5_g3
TRINITY_DN24473_c0_g1
TRINITY_DN69272_c0_g1
TRINITY_DN89203_c0_g1
TRINITY_DN48315_c0_g3
TRINITY_DN48307_c0_g1
TRINITY_DN48426_c0_g2
TRINITY_DN77816_c0_g1
TRINITY_DN37933_c0_g1
TRINITY_DN49830_c1_g3
TRINITY_DN49886_c0_g1
TRINITY_DN28934_c0_g1
TRINITY_DN92685_c0_g1
TRINITY_DN69742_c0_g1
TRINITY_DN61554_c0_g1
TRINITY_DN24726_c0_g1
TRINITY_DN50905_c0_g5
TRINITY_DN50976_c1_g1
TRINITY_DN41306_c0_g1
TRINITY_DN35687_c0_g1
TRINITY_DN23015_c0_g1
TRINITY_DN66491_c0_g1
TRINITY_DN61768_c0_g1
TRINITY_DN61747_c0_g1
TRINITY_DN96273_c0_g1
TRINITY_DN20937_c0_g1
TRINITY_DN34048_c0_g1
TRINITY_DN49109_c0_g3
TRINITY_DN65439_c0_g1
TRINITY_DN91964_c0_g1
TRINITY_DN91940_c0_g1
TRINITY_DN53353_c0_g1
TRINITY_DN51781_c1_g7
TRINITY_DN98569_c0_g1
TRINITY_DN52301_c2_g1
TRINITY_DN14123_c0_g1
TRINITY_DN4382_c0_g1
TRINITY_DN72504_c0_g1
TRINITY_DN49371_c2_g3
TRINITY_DN27879_c0_g1
TRINITY_DN27831_c0_g1
TRINITY_DN19425_c0_g1
TRINITY_DN25620_c0_g1
TRINITY_DN51099_c1_g2
TRINITY_DN49584_c0_g2
TRINITY_DN49594_c0_g2
TRINITY_DN16631_c0_g1
TRINITY_DN80763_c0_g1
TRINITY_DN52135_c1_g3
TRINITY_DN52158_c4_g4
TRINITY_DN56731_c0_g1
TRINITY_DN48844_c0_g2
TRINITY_DN48832_c8_g1
TRINITY_DN48809_c0_g2
TRINITY_DN81323_c0_g1
TRINITY_DN81391_c0_g1
TRINITY_DN51310_c0_g2
TRINITY_DN51391_c1_g2
TRINITY_DN85228_c0_g1
TRINITY_DN50036_c1_g4
TRINITY_DN50096_c5_g2
TRINITY_DN25015_c1_g1
TRINITY_DN30223_c0_g1
TRINITY_DN30246_c0_g1
TRINITY_DN30262_c0_g1
TRINITY_DN41210_c1_g2
TRINITY_DN59237_c0_g1
TRINITY_DN2209_c0_g1
TRINITY_DN259_c0_g1

## Sheet: Elements only in Pfam
Elements only in Pfam :
TRINITY_DN70124_c0_g1
TRINITY_DN40514_c0_g1
TRINITY_DN40516_c0_g2
TRINITY_DN48150_c2_g2
TRINITY_DN46537_c3_g2
TRINITY_DN16968_c0_g1
TRINITY_DN8312_c0_g1
TRINITY_DN80983_c0_g1
TRINITY_DN46672_c1_g1
TRINITY_DN50885_c1_g1
TRINITY_DN49012_c0_g1
TRINITY_DN60997_c0_g1
TRINITY_DN67919_c0_g1
TRINITY_DN93009_c0_g1
TRINITY_DN32409_c0_g1
TRINITY_DN26019_c0_g1
TRINITY_DN37373_c0_g1
TRINITY_DN54329_c0_g1
TRINITY_DN56546_c0_g1
TRINITY_DN77162_c0_g1
TRINITY_DN83399_c0_g1
TRINITY_DN36954_c0_g1
TRINITY_DN20392_c0_g1
TRINITY_DN71736_c0_g1
TRINITY_DN48379_c1_g1
TRINITY_DN96911_c0_g1
TRINITY_DN87228_c0_g1
TRINITY_DN87808_c0_g1
TRINITY_DN16458_c0_g1
TRINITY_DN73569_c0_g1
TRINITY_DN42214_c0_g1
TRINITY_DN42214_c0_g2
TRINITY_DN82135_c0_g1
TRINITY_DN94903_c0_g1
TRINITY_DN77938_c0_g1
TRINITY_DN72911_c0_g1
TRINITY_DN51123_c2_g1
TRINITY_DN51128_c1_g2
TRINITY_DN48857_c3_g2
TRINITY_DN44654_c2_g1
TRINITY_DN28422_c0_g1
TRINITY_DN86472_c0_g1
TRINITY_DN79200_c0_g1
TRINITY_DN48467_c0_g2
TRINITY_DN48467_c0_g1
TRINITY_DN48494_c0_g1
TRINITY_DN49877_c1_g2
TRINITY_DN38650_c0_g1
TRINITY_DN44719_c0_g1
TRINITY_DN54778_c0_g1
TRINITY_DN22786_c0_g1
TRINITY_DN22742_c0_g1
TRINITY_DN52304_c5_g1
TRINITY_DN39070_c0_g1
TRINITY_DN47479_c1_g1
TRINITY_DN71527_c0_g1
TRINITY_DN47866_c1_g3
TRINITY_DN47852_c0_g1
TRINITY_DN50538_c3_g3
TRINITY_DN30595_c0_g1
TRINITY_DN34961_c0_g1
TRINITY_DN34971_c0_g1
TRINITY_DN52022_c0_g5
TRINITY_DN39911_c0_g1
TRINITY_DN69581_c0_g1
TRINITY_DN17766_c0_g1
TRINITY_DN22914_c0_g1
TRINITY_DN48846_c0_g2
TRINITY_DN80889_c0_g1
TRINITY_DN68221_c0_g1
TRINITY_DN68263_c0_g1
TRINITY_DN28505_c0_g1
TRINITY_DN85890_c0_g1
TRINITY_DN46036_c0_g1
TRINITY_DN8880_c0_g1
TRINITY_DN7992_c0_g1
TRINITY_DN83778_c0_g1
TRINITY_DN29261_c0_g1
TRINITY_DN29241_c0_g1
TRINITY_DN2612_c0_g1
TRINITY_DN44912_c0_g1
TRINITY_DN42706_c0_g1
TRINITY_DN15865_c0_g1
TRINITY_DN80649_c0_g1
TRINITY_DN35702_c0_g1
TRINITY_DN41677_c0_g1
TRINITY_DN79446_c0_g1
TRINITY_DN50204_c0_g7
TRINITY_DN50215_c0_g2
TRINITY_DN50280_c1_g3
TRINITY_DN50233_c7_g7
TRINITY_DN41307_c0_g1
TRINITY_DN45162_c0_g1
TRINITY_DN73608_c0_g1
TRINITY_DN45830_c0_g1
TRINITY_DN95953_c0_g1
TRINITY_DN93765_c0_g1
TRINITY_DN74804_c0_g1
TRINITY_DN43456_c0_g1
TRINITY_DN44380_c1_g3
TRINITY_DN44344_c3_g1
TRINITY_DN20613_c0_g1
TRINITY_DN2803_c1_g1
TRINITY_DN39146_c0_g1
TRINITY_DN38964_c0_g1
TRINITY_DN51984_c0_g3
TRINITY_DN51929_c1_g1
TRINITY_DN49114_c0_g1
TRINITY_DN52255_c0_g2
TRINITY_DN29913_c0_g1
TRINITY_DN39253_c0_g1
TRINITY_DN69961_c0_g1
TRINITY_DN4175_c0_g1
TRINITY_DN66617_c0_g1
TRINITY_DN70266_c0_g1
TRINITY_DN92942_c0_g1
TRINITY_DN71662_c0_g1
TRINITY_DN29045_c0_g1
TRINITY_DN4646_c0_g1
TRINITY_DN4653_c0_g1
TRINITY_DN4887_c1_g1
TRINITY_DN48110_c1_g1
TRINITY_DN38252_c0_g1
TRINITY_DN49025_c0_g2
TRINITY_DN70570_c0_g1
TRINITY_DN43771_c0_g3
TRINITY_DN96203_c0_g1
TRINITY_DN96263_c0_g1
TRINITY_DN71494_c0_g1
TRINITY_DN33080_c0_g1
TRINITY_DN13568_c0_g1
TRINITY_DN9355_c0_g1
TRINITY_DN96767_c0_g1
TRINITY_DN75325_c0_g1
TRINITY_DN33437_c0_g1
TRINITY_DN15582_c0_g1
TRINITY_DN67835_c0_g1
TRINITY_DN67878_c0_g1
TRINITY_DN48001_c0_g3
TRINITY_DN19396_c0_g1
TRINITY_DN37190_c0_g1
TRINITY_DN2025_c0_g1
TRINITY_DN47935_c3_g4
TRINITY_DN2487_c0_g1
TRINITY_DN6073_c0_g1
TRINITY_DN92129_c0_g1
TRINITY_DN40942_c0_g1
TRINITY_DN51357_c1_g1
TRINITY_DN36449_c0_g1
TRINITY_DN27372_c0_g1
TRINITY_DN61309_c0_g1
TRINITY_DN10679_c0_g1
TRINITY_DN74663_c0_g1
TRINITY_DN72739_c0_g1
TRINITY_DN43898_c0_g2
TRINITY_DN51409_c1_g1
TRINITY_DN94717_c0_g1
TRINITY_DN28088_c0_g1
TRINITY_DN50962_c0_g1
TRINITY_DN50962_c0_g3
TRINITY_DN50931_c1_g1
TRINITY_DN41007_c0_g1
TRINITY_DN39519_c0_g1
TRINITY_DN61023_c0_g1
TRINITY_DN32272_c0_g1
TRINITY_DN98589_c0_g1
TRINITY_DN98576_c0_g1
TRINITY_DN51153_c0_g2
TRINITY_DN92463_c0_g1
TRINITY_DN14642_c0_g1
TRINITY_DN6505_c0_g1
TRINITY_DN83230_c0_g1
TRINITY_DN66874_c0_g1
TRINITY_DN42681_c0_g1
TRINITY_DN36631_c0_g1
TRINITY_DN81018_c0_g1
TRINITY_DN97977_c0_g1
TRINITY_DN24937_c0_g1
TRINITY_DN77218_c0_g1
TRINITY_DN77283_c0_g1
TRINITY_DN20254_c0_g1
TRINITY_DN19707_c0_g1
TRINITY_DN50987_c2_g1
TRINITY_DN7642_c0_g1
TRINITY_DN77813_c0_g1
TRINITY_DN49352_c0_g3
TRINITY_DN51371_c1_g1
TRINITY_DN44451_c1_g2
TRINITY_DN85056_c0_g1
TRINITY_DN49769_c0_g1
TRINITY_DN45879_c0_g1
TRINITY_DN44204_c3_g2
TRINITY_DN44204_c3_g1
TRINITY_DN43629_c0_g1
TRINITY_DN42356_c0_g1
TRINITY_DN64906_c0_g1
TRINITY_DN9007_c0_g1
TRINITY_DN97162_c0_g1
TRINITY_DN47000_c0_g2
TRINITY_DN47996_c0_g2
TRINITY_DN100769_c0_g1
TRINITY_DN101519_c0_g1
TRINITY_DN101361_c0_g1
TRINITY_DN100411_c0_g1
TRINITY_DN38132_c0_g2
TRINITY_DN38844_c0_g1
TRINITY_DN5037_c0_g1
TRINITY_DN82470_c0_g1
TRINITY_DN51546_c0_g1
TRINITY_DN40280_c1_g1
TRINITY_DN40270_c0_g2
TRINITY_DN40439_c0_g1
TRINITY_DN67053_c0_g1
TRINITY_DN89292_c0_g1
TRINITY_DN89204_c0_g1
TRINITY_DN76674_c0_g1
TRINITY_DN49948_c0_g1
TRINITY_DN49934_c1_g2
TRINITY_DN78658_c0_g1
TRINITY_DN83400_c0_g1
TRINITY_DN35408_c0_g1
TRINITY_DN49701_c4_g1
TRINITY_DN77509_c0_g1
TRINITY_DN77526_c0_g1
TRINITY_DN31791_c0_g1
TRINITY_DN92318_c0_g1
TRINITY_DN46353_c0_g2
TRINITY_DN49171_c0_g1
TRINITY_DN91959_c0_g1
TRINITY_DN59930_c0_g1
TRINITY_DN79719_c0_g1
TRINITY_DN99435_c0_g1
TRINITY_DN34521_c0_g1
TRINITY_DN52268_c0_g1
TRINITY_DN44520_c3_g1
TRINITY_DN44540_c0_g2
TRINITY_DN75871_c0_g1
TRINITY_DN81104_c0_g1
TRINITY_DN16835_c0_g1
TRINITY_DN62230_c0_g1
TRINITY_DN27414_c0_g1
TRINITY_DN24838_c0_g1
TRINITY_DN81210_c0_g1
TRINITY_DN36829_c0_g1
TRINITY_DN36881_c0_g1
TRINITY_DN30420_c0_g1
TRINITY_DN30488_c0_g1
TRINITY_DN21030_c0_g1
TRINITY_DN21088_c0_g1
TRINITY_DN28155_c0_g1
TRINITY_DN21472_c0_g1
TRINITY_DN36402_c0_g1
TRINITY_DN23017_c0_g1
TRINITY_DN3821_c0_g1
TRINITY_DN37021_c0_g1
TRINITY_DN37038_c0_g1
TRINITY_DN89944_c0_g1
TRINITY_DN26285_c0_g1
TRINITY_DN99755_c0_g1
TRINITY_DN83685_c0_g1
TRINITY_DN41753_c0_g1
TRINITY_DN48106_c2_g7
TRINITY_DN48106_c2_g8
TRINITY_DN48106_c2_g2
TRINITY_DN48106_c2_g10
TRINITY_DN56479_c0_g1
TRINITY_DN56434_c0_g1
TRINITY_DN36049_c0_g1
TRINITY_DN51545_c0_g1
TRINITY_DN51558_c3_g5
TRINITY_DN85912_c0_g1
TRINITY_DN85297_c0_g1
TRINITY_DN50093_c1_g4
TRINITY_DN12331_c0_g1
TRINITY_DN95286_c0_g1
TRINITY_DN85116_c0_g1
TRINITY_DN49133_c1_g1
TRINITY_DN88038_c0_g1
TRINITY_DN44019_c0_g1
TRINITY_DN26303_c0_g1
TRINITY_DN26374_c0_g1
TRINITY_DN22334_c0_g1
TRINITY_DN71008_c0_g1
TRINITY_DN77491_c0_g1
TRINITY_DN68651_c0_g1
TRINITY_DN72306_c0_g1
TRINITY_DN42857_c0_g1
TRINITY_DN95679_c0_g1
TRINITY_DN22454_c0_g1
TRINITY_DN3757_c0_g1
TRINITY_DN55530_c0_g1
TRINITY_DN12657_c0_g1
TRINITY_DN47382_c2_g1
TRINITY_DN52183_c4_g6
TRINITY_DN51900_c5_g4
TRINITY_DN85633_c0_g1
TRINITY_DN1259_c0_g1
TRINITY_DN30375_c0_g1
TRINITY_DN19015_c0_g1
TRINITY_DN48922_c1_g5
TRINITY_DN51089_c1_g1
TRINITY_DN94278_c0_g1
TRINITY_DN48286_c3_g2
TRINITY_DN49895_c0_g2
TRINITY_DN56050_c0_g1
TRINITY_DN52132_c1_g1
TRINITY_DN100888_c0_g1

## Sheet: Common in Swiss-Prot KEGG
Common elements in Swiss-Prot KEGG :
TRINITY_DN84408_c0_g1
TRINITY_DN84443_c0_g1
TRINITY_DN82001_c0_g1
TRINITY_DN69079_c0_g1
TRINITY_DN56486_c0_g1
TRINITY_DN56455_c0_g1
TRINITY_DN61980_c0_g1
TRINITY_DN85828_c0_g1
TRINITY_DN60769_c0_g1
TRINITY_DN60756_c0_g1
TRINITY_DN81762_c0_g1
TRINITY_DN81705_c0_g1
TRINITY_DN81796_c0_g1
TRINITY_DN62085_c0_g1
TRINITY_DN95301_c0_g1
TRINITY_DN99647_c0_g1
TRINITY_DN92171_c0_g1
TRINITY_DN82612_c0_g1
TRINITY_DN32972_c0_g1
TRINITY_DN57005_c0_g1
TRINITY_DN30897_c0_g1
TRINITY_DN60435_c0_g1
TRINITY_DN55158_c0_g1
TRINITY_DN93724_c0_g1
TRINITY_DN72467_c0_g1
TRINITY_DN80654_c0_g1
TRINITY_DN14065_c0_g1
TRINITY_DN84931_c0_g1
TRINITY_DN69664_c0_g1
TRINITY_DN55443_c0_g1
TRINITY_DN66186_c0_g1
TRINITY_DN70768_c0_g1
TRINITY_DN73704_c0_g1
TRINITY_DN71672_c0_g1
TRINITY_DN90503_c0_g1
TRINITY_DN85344_c0_g1
TRINITY_DN78306_c0_g1
TRINITY_DN78313_c0_g1
TRINITY_DN73824_c0_g1
TRINITY_DN62456_c0_g1
TRINITY_DN95098_c0_g1
TRINITY_DN95012_c0_g1
TRINITY_DN70134_c0_g1
TRINITY_DN91685_c0_g1
TRINITY_DN60270_c0_g1
TRINITY_DN83158_c0_g1
TRINITY_DN77228_c0_g1
TRINITY_DN84317_c0_g1
TRINITY_DN90309_c0_g1
TRINITY_DN23304_c0_g1
TRINITY_DN68869_c0_g1
TRINITY_DN88629_c0_g1
TRINITY_DN88673_c0_g1
TRINITY_DN74751_c0_g1
TRINITY_DN89957_c0_g1
TRINITY_DN60933_c0_g1
TRINITY_DN67960_c0_g1
TRINITY_DN93047_c0_g1
TRINITY_DN88771_c0_g1
TRINITY_DN88767_c0_g1
TRINITY_DN83352_c0_g1
TRINITY_DN71734_c0_g1
TRINITY_DN90048_c0_g1
TRINITY_DN72658_c0_g1
TRINITY_DN65317_c0_g1
TRINITY_DN94737_c0_g1
TRINITY_DN55051_c0_g1
TRINITY_DN63142_c0_g1
TRINITY_DN71834_c0_g1
TRINITY_DN69979_c0_g1
TRINITY_DN76728_c0_g1
TRINITY_DN67067_c0_g1
TRINITY_DN92982_c0_g1
TRINITY_DN71319_c0_g1
TRINITY_DN91326_c0_g1
TRINITY_DN78656_c0_g1
TRINITY_DN58300_c0_g1
TRINITY_DN64149_c0_g1
TRINITY_DN37728_c0_g1
TRINITY_DN85697_c0_g1
TRINITY_DN77515_c0_g1
TRINITY_DN79549_c0_g1
TRINITY_DN23914_c0_g1
TRINITY_DN94567_c0_g1
TRINITY_DN86784_c0_g1
TRINITY_DN86774_c0_g1
TRINITY_DN95807_c0_g1
TRINITY_DN63654_c0_g1
TRINITY_DN96106_c0_g1
TRINITY_DN71219_c0_g1
TRINITY_DN63728_c0_g1
TRINITY_DN65896_c0_g1
TRINITY_DN59398_c0_g1
TRINITY_DN81495_c0_g1
TRINITY_DN60323_c0_g1
TRINITY_DN16305_c0_g1
TRINITY_DN91539_c0_g1
TRINITY_DN91566_c0_g1
TRINITY_DN73602_c0_g1
TRINITY_DN18406_c0_g1
TRINITY_DN101223_c0_g1
TRINITY_DN100920_c0_g1
TRINITY_DN102346_c0_g1
TRINITY_DN101532_c0_g1
TRINITY_DN101379_c0_g1
TRINITY_DN100410_c0_g1
TRINITY_DN101005_c0_g1
TRINITY_DN71588_c0_g1
TRINITY_DN84809_c0_g1
TRINITY_DN59047_c0_g1
TRINITY_DN81238_c0_g1
TRINITY_DN76016_c0_g1
TRINITY_DN17069_c0_g1
TRINITY_DN83768_c0_g1
TRINITY_DN69322_c0_g1
TRINITY_DN69342_c0_g1
TRINITY_DN75212_c0_g1
TRINITY_DN99486_c0_g1
TRINITY_DN94400_c0_g1
TRINITY_DN94484_c0_g1
TRINITY_DN58218_c0_g1
TRINITY_DN78934_c0_g1
TRINITY_DN63508_c0_g1
TRINITY_DN60859_c0_g1
TRINITY_DN62632_c0_g1
TRINITY_DN97287_c0_g1
TRINITY_DN97220_c0_g1
TRINITY_DN68671_c0_g1
TRINITY_DN70504_c0_g1
TRINITY_DN82454_c0_g1
TRINITY_DN72141_c0_g1
TRINITY_DN58191_c0_g1
TRINITY_DN69486_c0_g1
TRINITY_DN65207_c0_g1
TRINITY_DN53585_c0_g1
TRINITY_DN53551_c0_g1
TRINITY_DN79147_c0_g1
TRINITY_DN72894_c0_g1
TRINITY_DN54317_c0_g1
TRINITY_DN76175_c0_g1
TRINITY_DN81178_c0_g1
TRINITY_DN68425_c0_g1
TRINITY_DN77344_c0_g1
TRINITY_DN69224_c0_g1
TRINITY_DN69296_c0_g1
TRINITY_DN91140_c0_g1
TRINITY_DN59403_c0_g1
TRINITY_DN92686_c0_g1
TRINITY_DN9304_c0_g1
TRINITY_DN66440_c0_g1
TRINITY_DN76841_c0_g1
TRINITY_DN65945_c0_g1
TRINITY_DN54928_c0_g1
TRINITY_DN98557_c0_g1
TRINITY_DN54452_c0_g1
TRINITY_DN19498_c0_g1
TRINITY_DN98182_c0_g1
TRINITY_DN62916_c0_g1
TRINITY_DN94274_c0_g1
TRINITY_DN76495_c0_g1
TRINITY_DN76491_c0_g1
TRINITY_DN94304_c0_g1
TRINITY_DN64451_c0_g1
TRINITY_DN56017_c0_g1
TRINITY_DN64301_c0_g1
TRINITY_DN75540_c0_g1
TRINITY_DN64868_c0_g1
TRINITY_DN58012_c0_g1

## Sheet: Common in NR GO
Common elements in NR GO :
TRINITY_DN35600_c0_g1
TRINITY_DN35641_c0_g1
TRINITY_DN35688_c0_g1
TRINITY_DN35627_c0_g1
TRINITY_DN35669_c0_g1
TRINITY_DN35670_c0_g1
TRINITY_DN74941_c0_g1
TRINITY_DN74904_c0_g1
TRINITY_DN74955_c0_g1
TRINITY_DN74979_c0_g1
TRINITY_DN41020_c0_g1
TRINITY_DN41003_c1_g2
TRINITY_DN41047_c1_g1
TRINITY_DN41047_c1_g2
TRINITY_DN41047_c1_g3
TRINITY_DN41047_c1_g4
TRINITY_DN41012_c1_g1
TRINITY_DN39568_c0_g1
TRINITY_DN39588_c0_g2
TRINITY_DN39540_c0_g1
TRINITY_DN39531_c0_g1
TRINITY_DN39538_c0_g1
TRINITY_DN39503_c0_g1
TRINITY_DN23014_c0_g1
TRINITY_DN23023_c0_g1
TRINITY_DN23003_c0_g1
TRINITY_DN13426_c0_g1
TRINITY_DN13420_c0_g1
TRINITY_DN78726_c0_g1
TRINITY_DN99909_c0_g1
TRINITY_DN19349_c0_g1
TRINITY_DN37138_c1_g1
TRINITY_DN54198_c0_g1
TRINITY_DN16720_c0_g1
TRINITY_DN76886_c0_g1
TRINITY_DN61799_c0_g1
TRINITY_DN61742_c0_g1
TRINITY_DN61719_c0_g1
TRINITY_DN61707_c0_g1
TRINITY_DN61730_c0_g1
TRINITY_DN96278_c0_g1
TRINITY_DN96218_c0_g1
TRINITY_DN96283_c0_g1
TRINITY_DN27541_c0_g1
TRINITY_DN27566_c0_g1
TRINITY_DN27548_c0_g1
TRINITY_DN27593_c0_g1
TRINITY_DN27585_c0_g1
TRINITY_DN20913_c0_g1
TRINITY_DN20991_c0_g1
TRINITY_DN20911_c0_g1
TRINITY_DN64048_c0_g1
TRINITY_DN64026_c0_g1
TRINITY_DN64055_c0_g1
TRINITY_DN90486_c0_g1
TRINITY_DN71410_c0_g1
TRINITY_DN33070_c0_g1
TRINITY_DN33077_c0_g1
TRINITY_DN33097_c0_g1
TRINITY_DN33037_c0_g1
TRINITY_DN11400_c0_g1
TRINITY_DN1605_c0_g1
TRINITY_DN1682_c0_g1
TRINITY_DN1652_c0_g1
TRINITY_DN27699_c0_g1
TRINITY_DN27637_c0_g1
TRINITY_DN39974_c0_g1
TRINITY_DN39934_c0_g1
TRINITY_DN2953_c0_g1
TRINITY_DN2992_c0_g1
TRINITY_DN49110_c1_g1
TRINITY_DN49194_c0_g1
TRINITY_DN49135_c0_g2
TRINITY_DN49135_c0_g3
TRINITY_DN49170_c3_g1
TRINITY_DN49178_c0_g2
TRINITY_DN49178_c0_g1
TRINITY_DN49169_c2_g1
TRINITY_DN49160_c2_g4
TRINITY_DN25562_c0_g1
TRINITY_DN25540_c0_g1
TRINITY_DN25585_c0_g1
TRINITY_DN85718_c0_g1
TRINITY_DN97495_c0_g1
TRINITY_DN97447_c0_g1
TRINITY_DN91966_c0_g1
TRINITY_DN78517_c0_g1
TRINITY_DN96665_c0_g1
TRINITY_DN96612_c0_g1
TRINITY_DN16182_c0_g1
TRINITY_DN16143_c0_g1
TRINITY_DN51662_c2_g5
TRINITY_DN51639_c10_g2
TRINITY_DN51652_c2_g1
TRINITY_DN51652_c3_g1
TRINITY_DN51648_c1_g4
TRINITY_DN51679_c3_g1
TRINITY_DN37824_c0_g1
TRINITY_DN37843_c0_g1
TRINITY_DN37801_c0_g1
TRINITY_DN37832_c0_g1
TRINITY_DN37804_c0_g1
TRINITY_DN37828_c0_g1
TRINITY_DN5244_c0_g1
TRINITY_DN5249_c0_g1
TRINITY_DN4611_c0_g1
TRINITY_DN55600_c0_g1
TRINITY_DN55668_c0_g1
TRINITY_DN32127_c0_g1
TRINITY_DN32151_c0_g1
TRINITY_DN32114_c0_g1
TRINITY_DN32113_c0_g1
TRINITY_DN32111_c0_g1
TRINITY_DN32156_c0_g1
TRINITY_DN53320_c0_g1
TRINITY_DN53395_c0_g1
TRINITY_DN51707_c1_g2
TRINITY_DN51736_c0_g1
TRINITY_DN51702_c1_g3
TRINITY_DN51770_c0_g2
TRINITY_DN51735_c1_g2
TRINITY_DN51723_c0_g1
TRINITY_DN51725_c1_g2
TRINITY_DN51740_c0_g2
TRINITY_DN51780_c0_g6
TRINITY_DN66314_c0_g1
TRINITY_DN54901_c0_g1
TRINITY_DN31147_c0_g1
TRINITY_DN98531_c0_g1
TRINITY_DN58641_c0_g1
TRINITY_DN52367_c1_g2
TRINITY_DN52396_c1_g3
TRINITY_DN52378_c2_g1
TRINITY_DN52311_c0_g3
TRINITY_DN52397_c1_g3
TRINITY_DN52359_c9_g3
TRINITY_DN52387_c2_g2
TRINITY_DN52302_c1_g1
TRINITY_DN52390_c1_g2
TRINITY_DN52312_c1_g2
TRINITY_DN52318_c2_g1
TRINITY_DN52321_c1_g1
TRINITY_DN52321_c3_g5
TRINITY_DN52321_c3_g11
TRINITY_DN52342_c2_g1
TRINITY_DN52342_c3_g4
TRINITY_DN52342_c3_g3
TRINITY_DN52342_c3_g2
TRINITY_DN52342_c3_g1
TRINITY_DN52351_c4_g1
TRINITY_DN4360_c0_g1
TRINITY_DN25106_c0_g1
TRINITY_DN10990_c0_g1
TRINITY_DN10948_c0_g1
TRINITY_DN10905_c0_g1
TRINITY_DN46557_c0_g1
TRINITY_DN46514_c0_g1
TRINITY_DN46559_c1_g1
TRINITY_DN46586_c0_g1
TRINITY_DN46538_c0_g1
TRINITY_DN82794_c0_g1
TRINITY_DN39450_c0_g1
TRINITY_DN78154_c0_g1
TRINITY_DN78106_c0_g1
TRINITY_DN78161_c0_g1
TRINITY_DN50510_c0_g2
TRINITY_DN50510_c0_g3
TRINITY_DN50515_c4_g2
TRINITY_DN50578_c0_g1
TRINITY_DN50582_c2_g6
TRINITY_DN50532_c0_g2
TRINITY_DN50508_c0_g1
TRINITY_DN3294_c0_g1
TRINITY_DN3261_c0_g1
TRINITY_DN3250_c0_g1
TRINITY_DN3249_c0_g1
TRINITY_DN93414_c0_g1
TRINITY_DN26719_c0_g1
TRINITY_DN43871_c0_g1
TRINITY_DN43829_c0_g1
TRINITY_DN47391_c1_g2
TRINITY_DN47349_c0_g4
TRINITY_DN47379_c6_g1
TRINITY_DN47335_c2_g2
TRINITY_DN47323_c4_g1
TRINITY_DN47336_c1_g3
TRINITY_DN13643_c0_g1
TRINITY_DN13609_c0_g1
TRINITY_DN13623_c0_g1
TRINITY_DN24416_c0_g1
TRINITY_DN77317_c0_g1
TRINITY_DN77356_c0_g1
TRINITY_DN77377_c0_g1
TRINITY_DN98731_c0_g1
TRINITY_DN98707_c0_g1
TRINITY_DN98795_c0_g1
TRINITY_DN89233_c0_g1
TRINITY_DN48317_c0_g2
TRINITY_DN48365_c3_g1
TRINITY_DN48359_c0_g1
TRINITY_DN48310_c2_g1
TRINITY_DN48331_c0_g1
TRINITY_DN48364_c0_g1
TRINITY_DN88045_c0_g1
TRINITY_DN88014_c0_g1
TRINITY_DN88022_c0_g1
TRINITY_DN40070_c0_g1
TRINITY_DN40070_c1_g1
TRINITY_DN40000_c0_g1
TRINITY_DN62805_c0_g1
TRINITY_DN62837_c0_g1
TRINITY_DN61450_c0_g1
TRINITY_DN61416_c0_g1
TRINITY_DN48487_c8_g1
TRINITY_DN48449_c0_g1
TRINITY_DN48465_c1_g1
TRINITY_DN48469_c11_g1
TRINITY_DN48479_c0_g3
TRINITY_DN48456_c2_g2
TRINITY_DN48456_c2_g3
TRINITY_DN48444_c0_g4
TRINITY_DN37329_c0_g1
TRINITY_DN37374_c0_g2
TRINITY_DN37327_c0_g1
TRINITY_DN33658_c0_g1
TRINITY_DN33623_c0_g1
TRINITY_DN33652_c0_g1
TRINITY_DN33609_c0_g1
TRINITY_DN33651_c0_g1
TRINITY_DN23571_c0_g1
TRINITY_DN23575_c0_g1
TRINITY_DN63468_c0_g1
TRINITY_DN37926_c0_g1
TRINITY_DN37977_c0_g1
TRINITY_DN37908_c0_g1
TRINITY_DN37909_c0_g1
TRINITY_DN37946_c0_g2
TRINITY_DN37958_c0_g1
TRINITY_DN87120_c0_g1
TRINITY_DN73059_c0_g1
TRINITY_DN73014_c0_g1
TRINITY_DN52986_c0_g1
TRINITY_DN52910_c0_g1
TRINITY_DN52917_c0_g1
TRINITY_DN49805_c9_g1
TRINITY_DN49886_c6_g1
TRINITY_DN49853_c0_g3
TRINITY_DN49841_c0_g1
TRINITY_DN49859_c1_g1
TRINITY_DN49887_c0_g2
TRINITY_DN87367_c0_g1
TRINITY_DN59407_c0_g1
TRINITY_DN59448_c0_g1
TRINITY_DN21854_c0_g1
TRINITY_DN21842_c0_g1
TRINITY_DN21849_c0_g1
TRINITY_DN21894_c0_g1
TRINITY_DN21813_c0_g1
TRINITY_DN47756_c2_g1
TRINITY_DN47703_c6_g1
TRINITY_DN47703_c6_g3
TRINITY_DN47703_c7_g1
TRINITY_DN47703_c7_g2
TRINITY_DN47715_c0_g1
TRINITY_DN43351_c0_g1
TRINITY_DN43320_c0_g2
TRINITY_DN21184_c0_g1
TRINITY_DN21167_c0_g1
TRINITY_DN21179_c0_g1
TRINITY_DN92601_c0_g1
TRINITY_DN42999_c0_g2
TRINITY_DN42902_c0_g1
TRINITY_DN42968_c0_g1
TRINITY_DN42961_c0_g1
TRINITY_DN42976_c1_g1
TRINITY_DN42920_c0_g1
TRINITY_DN42959_c3_g1
TRINITY_DN13567_c0_g1
TRINITY_DN9331_c0_g1
TRINITY_DN9327_c0_g1
TRINITY_DN9399_c0_g1
TRINITY_DN69781_c0_g1
TRINITY_DN96755_c0_g1
TRINITY_DN24721_c0_g1
TRINITY_DN24797_c0_g1
TRINITY_DN24718_c0_g2
TRINITY_DN24767_c1_g1
TRINITY_DN24763_c0_g1
TRINITY_DN50923_c1_g4
TRINITY_DN50914_c3_g1
TRINITY_DN50914_c3_g3
TRINITY_DN50904_c0_g1
TRINITY_DN50904_c0_g2
TRINITY_DN50936_c4_g1
TRINITY_DN50936_c5_g1
TRINITY_DN50911_c1_g5
TRINITY_DN41342_c0_g1
TRINITY_DN41395_c0_g1
TRINITY_DN41387_c0_g1
TRINITY_DN41327_c0_g1
TRINITY_DN41355_c0_g1
TRINITY_DN41378_c0_g1
TRINITY_DN41384_c0_g1
TRINITY_DN17599_c0_g1
TRINITY_DN17569_c0_g1
TRINITY_DN30025_c0_g1
TRINITY_DN30034_c0_g1
TRINITY_DN30033_c0_g1
TRINITY_DN30002_c0_g1
TRINITY_DN48156_c0_g1
TRINITY_DN48151_c0_g1
TRINITY_DN48169_c3_g1
TRINITY_DN12400_c0_g1
TRINITY_DN12475_c0_g1
TRINITY_DN86505_c0_g1
TRINITY_DN86568_c0_g1
TRINITY_DN86566_c0_g1
TRINITY_DN53989_c0_g1
TRINITY_DN30785_c0_g1
TRINITY_DN30788_c0_g1
TRINITY_DN30797_c0_g1
TRINITY_DN30770_c0_g1
TRINITY_DN92105_c0_g2
TRINITY_DN82637_c0_g1
TRINITY_DN82668_c0_g1
TRINITY_DN82670_c0_g1
TRINITY_DN82682_c0_g1
TRINITY_DN32911_c0_g1
TRINITY_DN32913_c0_g1
TRINITY_DN54027_c0_g1
TRINITY_DN88512_c0_g1
TRINITY_DN40945_c1_g1
TRINITY_DN57034_c0_g1
TRINITY_DN66708_c0_g1
TRINITY_DN66702_c0_g1
TRINITY_DN26005_c0_g1
TRINITY_DN26084_c0_g1
TRINITY_DN84518_c0_g1
TRINITY_DN30868_c0_g1
TRINITY_DN30809_c0_g1
TRINITY_DN30843_c0_g1
TRINITY_DN30840_c0_g1
TRINITY_DN30851_c0_g1
TRINITY_DN30833_c0_g1
TRINITY_DN60413_c0_g1
TRINITY_DN95907_c0_g1
TRINITY_DN95923_c0_g1
TRINITY_DN55189_c0_g1
TRINITY_DN93796_c0_g1
TRINITY_DN93766_c0_g1
TRINITY_DN93754_c0_g1
TRINITY_DN74893_c0_g1
TRINITY_DN43480_c0_g1
TRINITY_DN43497_c0_g1
TRINITY_DN43497_c1_g1
TRINITY_DN43467_c0_g1
TRINITY_DN92793_c0_g1
TRINITY_DN25861_c0_g1
TRINITY_DN25809_c0_g1
TRINITY_DN25890_c0_g1
TRINITY_DN25867_c0_g1
TRINITY_DN25860_c0_g1
TRINITY_DN52712_c0_g1
TRINITY_DN7675_c0_g1
TRINITY_DN48957_c1_g4
TRINITY_DN48910_c1_g4
TRINITY_DN48912_c0_g1
TRINITY_DN48948_c0_g2
TRINITY_DN48914_c4_g2
TRINITY_DN48984_c7_g4
TRINITY_DN48997_c2_g1
TRINITY_DN36276_c0_g1
TRINITY_DN36281_c0_g1
TRINITY_DN36250_c0_g1
TRINITY_DN80664_c0_g1
TRINITY_DN80671_c0_g1
TRINITY_DN94113_c0_g1
TRINITY_DN94155_c0_g1
TRINITY_DN35723_c0_g1
TRINITY_DN35764_c0_g1
TRINITY_DN14080_c0_g1
TRINITY_DN84956_c0_g1
TRINITY_DN84947_c0_g1
TRINITY_DN93372_c0_g1
TRINITY_DN13194_c0_g1
TRINITY_DN13178_c0_g1
TRINITY_DN19940_c0_g1
TRINITY_DN66814_c0_g1
TRINITY_DN66898_c0_g1
TRINITY_DN66841_c0_g1
TRINITY_DN80384_c0_g1
TRINITY_DN80342_c0_g1
TRINITY_DN42666_c1_g1
TRINITY_DN42666_c4_g1
TRINITY_DN42667_c0_g1
TRINITY_DN30903_c0_g1
TRINITY_DN30983_c0_g1
TRINITY_DN30973_c0_g2
TRINITY_DN30991_c0_g1
TRINITY_DN30916_c0_g2
TRINITY_DN28527_c0_g1
TRINITY_DN28532_c0_g1
TRINITY_DN28542_c1_g1
TRINITY_DN69693_c0_g1
TRINITY_DN69643_c0_g1
TRINITY_DN44952_c0_g2
TRINITY_DN44980_c3_g1
TRINITY_DN44980_c3_g3
TRINITY_DN44990_c0_g2
TRINITY_DN44981_c4_g2
TRINITY_DN44981_c4_g4
TRINITY_DN44981_c5_g3
TRINITY_DN90156_c0_g1
TRINITY_DN67273_c0_g1
TRINITY_DN66192_c0_g1
TRINITY_DN47592_c0_g1
TRINITY_DN47501_c4_g3
TRINITY_DN47501_c4_g4
TRINITY_DN47501_c4_g5
TRINITY_DN47529_c5_g1
TRINITY_DN80475_c0_g1
TRINITY_DN80446_c0_g1
TRINITY_DN10163_c0_g1
TRINITY_DN31939_c0_g1
TRINITY_DN31968_c0_g1
TRINITY_DN49672_c0_g1
TRINITY_DN49652_c1_g2
TRINITY_DN49684_c2_g2
TRINITY_DN49684_c3_g1
TRINITY_DN30479_c0_g1
TRINITY_DN30479_c1_g1
TRINITY_DN30443_c0_g1
TRINITY_DN30445_c1_g1
TRINITY_DN30470_c1_g1
TRINITY_DN96436_c0_g1
TRINITY_DN96433_c0_g1
TRINITY_DN22634_c0_g1
TRINITY_DN22636_c0_g2
TRINITY_DN22603_c0_g1
TRINITY_DN25384_c0_g1
TRINITY_DN91435_c0_g1
TRINITY_DN21029_c0_g1
TRINITY_DN21040_c0_g1
TRINITY_DN21040_c1_g1
TRINITY_DN28140_c0_g1
TRINITY_DN55363_c0_g1
TRINITY_DN55378_c0_g1
TRINITY_DN84759_c0_g1
TRINITY_DN84732_c0_g1
TRINITY_DN70006_c0_g1
TRINITY_DN16042_c0_g1
TRINITY_DN16034_c0_g1
TRINITY_DN16075_c0_g1
TRINITY_DN54607_c0_g1
TRINITY_DN73779_c0_g1
TRINITY_DN15187_c0_g1
TRINITY_DN3144_c0_g1
TRINITY_DN3119_c0_g1
TRINITY_DN3147_c0_g1
TRINITY_DN3117_c0_g1
TRINITY_DN58965_c0_g1
TRINITY_DN58996_c0_g1
TRINITY_DN48523_c4_g4
TRINITY_DN48540_c0_g2
TRINITY_DN48548_c0_g1
TRINITY_DN48544_c1_g1
TRINITY_DN48547_c2_g1
TRINITY_DN20208_c0_g1
TRINITY_DN19731_c0_g1
TRINITY_DN84619_c0_g1
TRINITY_DN84622_c0_g1
TRINITY_DN14281_c0_g1
TRINITY_DN14270_c0_g1
TRINITY_DN44349_c0_g1
TRINITY_DN44344_c3_g2
TRINITY_DN44330_c0_g1
TRINITY_DN44333_c0_g1
TRINITY_DN95644_c0_g1
TRINITY_DN65189_c0_g1
TRINITY_DN65177_c0_g1
TRINITY_DN51247_c0_g1
TRINITY_DN51220_c7_g1
TRINITY_DN51227_c0_g1
TRINITY_DN38643_c0_g1
TRINITY_DN38666_c0_g1
TRINITY_DN44831_c0_g1
TRINITY_DN44844_c1_g1
TRINITY_DN15482_c0_g1
TRINITY_DN15495_c0_g1
TRINITY_DN15439_c0_g1
TRINITY_DN78996_c0_g1
TRINITY_DN78932_c1_g1
TRINITY_DN11732_c0_g1
TRINITY_DN11790_c0_g1
TRINITY_DN11723_c0_g1
TRINITY_DN13003_c0_g1
TRINITY_DN13068_c0_g1
TRINITY_DN47258_c4_g1
TRINITY_DN47258_c4_g6
TRINITY_DN47278_c0_g1
TRINITY_DN47218_c2_g1
TRINITY_DN47218_c3_g6
TRINITY_DN47269_c0_g1
TRINITY_DN63907_c0_g1
TRINITY_DN63976_c0_g1
TRINITY_DN63905_c0_g1
TRINITY_DN63551_c0_g1
TRINITY_DN78829_c0_g1
TRINITY_DN78805_c0_g1
TRINITY_DN78836_c0_g1
TRINITY_DN18974_c0_g1
TRINITY_DN3916_c0_g1
TRINITY_DN3902_c0_g1
TRINITY_DN56933_c0_g1
TRINITY_DN56949_c0_g1
TRINITY_DN56983_c0_g1
TRINITY_DN60866_c0_g1
TRINITY_DN60850_c0_g1
TRINITY_DN29621_c0_g1
TRINITY_DN29616_c0_g1
TRINITY_DN29667_c0_g1
TRINITY_DN29663_c0_g2
TRINITY_DN96329_c0_g1
TRINITY_DN96301_c0_g1
TRINITY_DN62604_c0_g1
TRINITY_DN62672_c0_g1
TRINITY_DN42314_c0_g1
TRINITY_DN42313_c0_g1
TRINITY_DN42303_c0_g1
TRINITY_DN42309_c1_g1
TRINITY_DN43147_c0_g1
TRINITY_DN43127_c0_g1
TRINITY_DN43161_c0_g1
TRINITY_DN43107_c0_g1
TRINITY_DN29826_c0_g1
TRINITY_DN29896_c0_g1
TRINITY_DN29887_c0_g1
TRINITY_DN89639_c0_g1
TRINITY_DN97272_c0_g1
TRINITY_DN9123_c0_g1
TRINITY_DN15252_c0_g1
TRINITY_DN15297_c0_g1
TRINITY_DN16568_c0_g1
TRINITY_DN16511_c0_g1
TRINITY_DN41196_c0_g1
TRINITY_DN41163_c3_g1
TRINITY_DN41163_c3_g3
TRINITY_DN41163_c3_g7
TRINITY_DN41177_c0_g1
TRINITY_DN41120_c0_g1
TRINITY_DN41180_c0_g1
TRINITY_DN41105_c0_g1
TRINITY_DN41193_c0_g1
TRINITY_DN94084_c0_g1
TRINITY_DN94066_c0_g1
TRINITY_DN94081_c0_g1
TRINITY_DN77474_c0_g1
TRINITY_DN77406_c0_g1
TRINITY_DN97781_c0_g1
TRINITY_DN18882_c0_g1
TRINITY_DN21968_c0_g1
TRINITY_DN21983_c0_g1
TRINITY_DN21982_c0_g1
TRINITY_DN68625_c0_g1
TRINITY_DN42415_c0_g1
TRINITY_DN42426_c0_g1
TRINITY_DN42418_c1_g1
TRINITY_DN70597_c0_g1
TRINITY_DN70538_c0_g1
TRINITY_DN61278_c0_g1
TRINITY_DN51994_c1_g1
TRINITY_DN51988_c0_g1
TRINITY_DN51988_c3_g5
TRINITY_DN51988_c3_g9
TRINITY_DN51998_c4_g1
TRINITY_DN51986_c5_g1
TRINITY_DN51968_c1_g3
TRINITY_DN51966_c4_g1
TRINITY_DN51973_c1_g1
TRINITY_DN51965_c0_g2
TRINITY_DN51928_c1_g2
TRINITY_DN51974_c0_g1
TRINITY_DN51909_c3_g1
TRINITY_DN51984_c2_g1
TRINITY_DN51922_c4_g5
TRINITY_DN51926_c1_g2
TRINITY_DN51929_c1_g4
TRINITY_DN51937_c0_g4
TRINITY_DN19227_c0_g1
TRINITY_DN74117_c0_g2
TRINITY_DN75418_c0_g1
TRINITY_DN75474_c0_g1
TRINITY_DN75407_c0_g1
TRINITY_DN26426_c0_g1
TRINITY_DN96526_c0_g1
TRINITY_DN51598_c1_g2
TRINITY_DN51507_c3_g2
TRINITY_DN51507_c3_g4
TRINITY_DN51507_c3_g7
TRINITY_DN51507_c4_g3
TRINITY_DN51594_c0_g1
TRINITY_DN51510_c1_g2
TRINITY_DN51510_c2_g1
TRINITY_DN72176_c0_g1
TRINITY_DN58198_c0_g1
TRINITY_DN58143_c0_g1
TRINITY_DN12268_c0_g1
TRINITY_DN12217_c0_g1
TRINITY_DN43685_c0_g1
TRINITY_DN43609_c0_g1
TRINITY_DN43645_c0_g2
TRINITY_DN43602_c0_g1
TRINITY_DN42117_c0_g1
TRINITY_DN42187_c1_g1
TRINITY_DN42187_c3_g1
TRINITY_DN42127_c0_g1
TRINITY_DN4903_c0_g1
TRINITY_DN93962_c0_g1
TRINITY_DN20402_c0_g1
TRINITY_DN20497_c0_g1
TRINITY_DN26373_c0_g1
TRINITY_DN26357_c0_g1
TRINITY_DN26379_c0_g2
TRINITY_DN8215_c0_g1
TRINITY_DN8216_c0_g1
TRINITY_DN91044_c0_g1
TRINITY_DN22379_c0_g1
TRINITY_DN22338_c0_g1
TRINITY_DN44740_c0_g1
TRINITY_DN44763_c1_g1
TRINITY_DN44722_c0_g1
TRINITY_DN44757_c0_g1
TRINITY_DN76393_c0_g1
TRINITY_DN65261_c0_g1
TRINITY_DN65219_c0_g1
TRINITY_DN64775_c0_g1
TRINITY_DN64750_c0_g1
TRINITY_DN53765_c0_g1
TRINITY_DN53729_c0_g1
TRINITY_DN99361_c0_g1
TRINITY_DN71647_c0_g1
TRINITY_DN90550_c0_g1
TRINITY_DN90552_c0_g1
TRINITY_DN85353_c0_g1
TRINITY_DN85339_c0_g1
TRINITY_DN39078_c2_g1
TRINITY_DN39099_c0_g1
TRINITY_DN39010_c0_g2
TRINITY_DN33347_c0_g1
TRINITY_DN33334_c0_g1
TRINITY_DN33342_c0_g1
TRINITY_DN20710_c0_g1
TRINITY_DN45458_c9_g1
TRINITY_DN45458_c14_g5
TRINITY_DN45458_c14_g9
TRINITY_DN45464_c0_g1
TRINITY_DN45474_c2_g1
TRINITY_DN45431_c3_g2
TRINITY_DN45431_c3_g4
TRINITY_DN45431_c3_g5
TRINITY_DN78389_c0_g1
TRINITY_DN7825_c0_g1
TRINITY_DN57862_c0_g1
TRINITY_DN57833_c0_g1
TRINITY_DN57832_c0_g1
TRINITY_DN11969_c0_g1
TRINITY_DN11903_c0_g1
TRINITY_DN84220_c0_g1
TRINITY_DN40170_c0_g1
TRINITY_DN40121_c1_g2
TRINITY_DN89564_c0_g1
TRINITY_DN89555_c0_g1
TRINITY_DN57790_c0_g1
TRINITY_DN57769_c0_g1
TRINITY_DN73918_c0_g1
TRINITY_DN73922_c0_g1
TRINITY_DN73995_c0_g1
TRINITY_DN32635_c1_g1
TRINITY_DN32675_c0_g1
TRINITY_DN32695_c0_g2
TRINITY_DN35537_c0_g1
TRINITY_DN35581_c0_g1
TRINITY_DN35536_c0_g1
TRINITY_DN35549_c0_g1
TRINITY_DN27018_c1_g1
TRINITY_DN27095_c0_g1
TRINITY_DN62408_c0_g1
TRINITY_DN62448_c0_g1
TRINITY_DN90272_c0_g1
TRINITY_DN30688_c0_g1
TRINITY_DN44215_c0_g2
TRINITY_DN44215_c0_g5
TRINITY_DN44204_c3_g3
TRINITY_DN44230_c5_g1
TRINITY_DN44230_c9_g1
TRINITY_DN44230_c10_g5
TRINITY_DN70122_c0_g1
TRINITY_DN70116_c0_g1
TRINITY_DN70117_c0_g1
TRINITY_DN45365_c0_g2
TRINITY_DN45376_c0_g2
TRINITY_DN45362_c0_g1
TRINITY_DN45367_c2_g4
TRINITY_DN45367_c2_g5
TRINITY_DN45375_c1_g3
TRINITY_DN45375_c1_g1
TRINITY_DN91637_c0_g1
TRINITY_DN34856_c0_g1
TRINITY_DN64986_c0_g1
TRINITY_DN9076_c0_g1
TRINITY_DN9075_c0_g1
TRINITY_DN56851_c0_g1
TRINITY_DN56861_c0_g1
TRINITY_DN56836_c0_g1
TRINITY_DN59724_c0_g1
TRINITY_DN11201_c0_g1
TRINITY_DN11294_c0_g1
TRINITY_DN39311_c0_g2
TRINITY_DN39319_c0_g3
TRINITY_DN39363_c0_g1
TRINITY_DN39349_c0_g1
TRINITY_DN98053_c0_g1
TRINITY_DN857_c0_g1
TRINITY_DN34101_c0_g2
TRINITY_DN34182_c0_g1
TRINITY_DN34145_c0_g1
TRINITY_DN34193_c0_g1
TRINITY_DN85069_c0_g1
TRINITY_DN85045_c0_g1
TRINITY_DN20539_c0_g1
TRINITY_DN1353_c0_g1
TRINITY_DN49772_c0_g1
TRINITY_DN49799_c0_g1
TRINITY_DN49743_c0_g1
TRINITY_DN49777_c0_g1
TRINITY_DN49749_c0_g1
TRINITY_DN49787_c0_g1
TRINITY_DN35375_c0_g2
TRINITY_DN35330_c0_g1
TRINITY_DN35373_c0_g1
TRINITY_DN35347_c0_g1
TRINITY_DN35377_c0_g1
TRINITY_DN30564_c0_g1
TRINITY_DN30584_c0_g1
TRINITY_DN30503_c0_g1
TRINITY_DN98698_c0_g1
TRINITY_DN10857_c0_g1
TRINITY_DN34976_c0_g2
TRINITY_DN34978_c0_g2
TRINITY_DN34965_c0_g1
TRINITY_DN24147_c0_g1
TRINITY_DN24172_c0_g1
TRINITY_DN6141_c0_g1
TRINITY_DN19161_c0_g1
TRINITY_DN41484_c0_g1
TRINITY_DN45133_c0_g3
TRINITY_DN45146_c0_g1
TRINITY_DN45155_c0_g1
TRINITY_DN45199_c0_g1
TRINITY_DN77206_c0_g1
TRINITY_DN84348_c0_g1
TRINITY_DN84389_c0_g1
TRINITY_DN50200_c6_g1
TRINITY_DN50237_c1_g1
TRINITY_DN50244_c0_g2
TRINITY_DN50239_c0_g1
TRINITY_DN50210_c0_g1
TRINITY_DN50299_c4_g2
TRINITY_DN50299_c6_g1
TRINITY_DN50282_c3_g2
TRINITY_DN85454_c0_g1
TRINITY_DN85424_c0_g1
TRINITY_DN6886_c0_g1
TRINITY_DN6864_c0_g1
TRINITY_DN21546_c0_g1
TRINITY_DN28867_c0_g1
TRINITY_DN28801_c0_g1
TRINITY_DN75139_c0_g1
TRINITY_DN75104_c0_g1
TRINITY_DN75127_c0_g1
TRINITY_DN12756_c1_g1
TRINITY_DN40582_c0_g1
TRINITY_DN40569_c0_g1
TRINITY_DN40567_c0_g1
TRINITY_DN87570_c0_g1
TRINITY_DN87591_c0_g1
TRINITY_DN87564_c0_g1
TRINITY_DN30301_c0_g1
TRINITY_DN30312_c0_g1
TRINITY_DN30352_c0_g1
TRINITY_DN19058_c0_g1
TRINITY_DN19036_c0_g1
TRINITY_DN55876_c0_g1
TRINITY_DN33276_c0_g1
TRINITY_DN87991_c0_g1
TRINITY_DN87966_c0_g1
TRINITY_DN87901_c0_g1
TRINITY_DN87948_c0_g1
TRINITY_DN45804_c0_g1
TRINITY_DN45805_c1_g2
TRINITY_DN45808_c0_g1
TRINITY_DN14408_c0_g1
TRINITY_DN23270_c0_g1
TRINITY_DN23267_c0_g1
TRINITY_DN23267_c0_g2
TRINITY_DN29012_c0_g1
TRINITY_DN29031_c0_g1
TRINITY_DN29083_c0_g1
TRINITY_DN30104_c0_g1
TRINITY_DN30165_c0_g1
TRINITY_DN79624_c0_g1
TRINITY_DN79620_c0_g1
TRINITY_DN18219_c0_g1
TRINITY_DN18221_c0_g1
TRINITY_DN86107_c0_g1
TRINITY_DN86139_c0_g1
TRINITY_DN92435_c0_g1
TRINITY_DN24591_c0_g1
TRINITY_DN24508_c0_g1
TRINITY_DN24551_c0_g1
TRINITY_DN24570_c0_g1
TRINITY_DN14645_c0_g1
TRINITY_DN14699_c0_g1
TRINITY_DN47926_c3_g2
TRINITY_DN47980_c0_g1
TRINITY_DN47919_c1_g1
TRINITY_DN47905_c0_g1
TRINITY_DN47951_c1_g1
TRINITY_DN47951_c1_g2
TRINITY_DN47920_c3_g1
TRINITY_DN47920_c3_g8
TRINITY_DN47920_c3_g6
TRINITY_DN47978_c1_g1
TRINITY_DN47983_c0_g1
TRINITY_DN35144_c0_g2
TRINITY_DN35158_c0_g1
TRINITY_DN35113_c0_g1
TRINITY_DN35174_c0_g1
TRINITY_DN35195_c0_g1
TRINITY_DN35116_c0_g1
TRINITY_DN96153_c0_g1
TRINITY_DN96189_c0_g1
TRINITY_DN96166_c0_g1
TRINITY_DN96158_c0_g1
TRINITY_DN17466_c0_g1
TRINITY_DN71283_c0_g1
TRINITY_DN95754_c0_g1
TRINITY_DN95743_c0_g1
TRINITY_DN95728_c0_g1
TRINITY_DN95792_c0_g1
TRINITY_DN93642_c0_g1
TRINITY_DN93694_c0_g1
TRINITY_DN43504_c0_g1
TRINITY_DN43545_c0_g1
TRINITY_DN43532_c1_g2
TRINITY_DN43541_c1_g2
TRINITY_DN43541_c1_g4
TRINITY_DN13963_c0_g1
TRINITY_DN13922_c0_g1
TRINITY_DN13337_c0_g1
TRINITY_DN13385_c0_g1
TRINITY_DN80948_c0_g1
TRINITY_DN80991_c0_g1
TRINITY_DN63764_c0_g1
TRINITY_DN65861_c0_g1
TRINITY_DN22092_c0_g1
TRINITY_DN35953_c0_g1
TRINITY_DN35901_c0_g1
TRINITY_DN35902_c0_g1
TRINITY_DN35989_c0_g1
TRINITY_DN35970_c2_g2
TRINITY_DN35974_c0_g1
TRINITY_DN53246_c0_g1
TRINITY_DN53232_c0_g1
TRINITY_DN53229_c0_g1
TRINITY_DN13713_c0_g1
TRINITY_DN610_c0_g1
TRINITY_DN687_c0_g1
TRINITY_DN696_c0_g1
TRINITY_DN97830_c0_g1
TRINITY_DN97813_c0_g1
TRINITY_DN4294_c0_g1
TRINITY_DN28425_c0_g1
TRINITY_DN28418_c0_g1
TRINITY_DN28497_c0_g1
TRINITY_DN28406_c0_g1
TRINITY_DN59301_c0_g1
TRINITY_DN59337_c0_g1
TRINITY_DN59389_c0_g1
TRINITY_DN74431_c0_g1
TRINITY_DN74404_c0_g1
TRINITY_DN86490_c0_g1
TRINITY_DN86469_c0_g1
TRINITY_DN68090_c0_g1
TRINITY_DN68097_c0_g1
TRINITY_DN79205_c0_g1
TRINITY_DN79203_c0_g1
TRINITY_DN79217_c0_g1
TRINITY_DN98222_c0_g1
TRINITY_DN6598_c0_g1
TRINITY_DN6570_c0_g1
TRINITY_DN6504_c0_g1
TRINITY_DN81494_c0_g1
TRINITY_DN81484_c0_g1
TRINITY_DN81405_c0_g1
TRINITY_DN23754_c0_g1
TRINITY_DN22543_c0_g1
TRINITY_DN22561_c0_g1
TRINITY_DN60386_c0_g1
TRINITY_DN60371_c0_g1
TRINITY_DN2792_c0_g1
TRINITY_DN33123_c0_g1
TRINITY_DN33108_c0_g1
TRINITY_DN33195_c0_g1
TRINITY_DN33126_c0_g1
TRINITY_DN33126_c1_g1
TRINITY_DN50307_c0_g3
TRINITY_DN50391_c0_g1
TRINITY_DN50374_c2_g4
TRINITY_DN50340_c6_g2
TRINITY_DN50383_c0_g2
TRINITY_DN50393_c6_g2
TRINITY_DN50313_c2_g4
TRINITY_DN50371_c2_g1
TRINITY_DN50386_c6_g4
TRINITY_DN27150_c0_g1
TRINITY_DN16368_c0_g1
TRINITY_DN16306_c0_g1
TRINITY_DN5301_c0_g1
TRINITY_DN82919_c0_g1
TRINITY_DN82964_c0_g1
TRINITY_DN83877_c0_g1
TRINITY_DN83881_c0_g1
TRINITY_DN83835_c0_g1
TRINITY_DN83857_c0_g1
TRINITY_DN83846_c0_g1
TRINITY_DN91573_c0_g1
TRINITY_DN73634_c0_g1
TRINITY_DN90890_c0_g1
TRINITY_DN90877_c0_g1
TRINITY_DN19553_c0_g1
TRINITY_DN19574_c0_g1
TRINITY_DN78271_c0_g1
TRINITY_DN78241_c0_g1
TRINITY_DN67725_c0_g1
TRINITY_DN52244_c2_g1
TRINITY_DN52230_c0_g1
TRINITY_DN52232_c7_g2
TRINITY_DN52240_c2_g2
TRINITY_DN52277_c8_g1
TRINITY_DN52220_c1_g3
TRINITY_DN52282_c1_g2
TRINITY_DN29963_c0_g1
TRINITY_DN29957_c0_g1
TRINITY_DN39297_c0_g1
TRINITY_DN39204_c0_g1
TRINITY_DN39269_c0_g1
TRINITY_DN39248_c0_g1
TRINITY_DN39257_c2_g1
TRINITY_DN99234_c0_g1
TRINITY_DN99237_c0_g1
TRINITY_DN49946_c4_g1
TRINITY_DN49983_c0_g1
TRINITY_DN49992_c2_g2
TRINITY_DN49970_c0_g1
TRINITY_DN49969_c1_g1
TRINITY_DN16991_c0_g1
TRINITY_DN16972_c0_g1
TRINITY_DN5648_c0_g1
TRINITY_DN5666_c0_g1
TRINITY_DN5691_c0_g1
TRINITY_DN31809_c0_g1
TRINITY_DN87709_c0_g1
TRINITY_DN87774_c0_g1
TRINITY_DN73372_c0_g1
TRINITY_DN86985_c0_g1
TRINITY_DN86907_c0_g1
TRINITY_DN86906_c0_g1
TRINITY_DN86972_c0_g1
TRINITY_DN86913_c0_g1
TRINITY_DN8301_c0_g1
TRINITY_DN8393_c0_g1
TRINITY_DN4775_c0_g1
TRINITY_DN79907_c0_g1
TRINITY_DN51415_c0_g1
TRINITY_DN51454_c0_g1
TRINITY_DN51469_c2_g2
TRINITY_DN51444_c0_g1
TRINITY_DN51460_c1_g1
TRINITY_DN51427_c0_g2
TRINITY_DN51421_c3_g1
TRINITY_DN51421_c3_g2
TRINITY_DN51421_c3_g3
TRINITY_DN51421_c4_g2
TRINITY_DN51443_c2_g2
TRINITY_DN51483_c1_g1
TRINITY_DN51442_c4_g2
TRINITY_DN51468_c1_g3
TRINITY_DN49351_c2_g2
TRINITY_DN49340_c0_g5
TRINITY_DN49340_c0_g9
TRINITY_DN49314_c6_g1
TRINITY_DN49308_c0_g2
TRINITY_DN49365_c1_g1
TRINITY_DN49399_c0_g1
TRINITY_DN49324_c0_g2
TRINITY_DN49397_c0_g1
TRINITY_DN49377_c0_g3
TRINITY_DN49386_c1_g3
TRINITY_DN49386_c1_g1
TRINITY_DN49354_c0_g2
TRINITY_DN49335_c0_g1
TRINITY_DN49310_c0_g2
TRINITY_DN19818_c0_g1
TRINITY_DN19893_c0_g1
TRINITY_DN19836_c0_g1
TRINITY_DN54715_c0_g1
TRINITY_DN54753_c0_g1
TRINITY_DN54764_c0_g1
TRINITY_DN54749_c0_g1
TRINITY_DN54742_c0_g1
TRINITY_DN54766_c0_g1
TRINITY_DN54410_c0_g1
TRINITY_DN8590_c0_g1
TRINITY_DN8570_c0_g1
TRINITY_DN27825_c0_g1
TRINITY_DN95105_c0_g1
TRINITY_DN95130_c0_g1
TRINITY_DN19475_c0_g1
TRINITY_DN19441_c0_g1
TRINITY_DN19463_c0_g1
TRINITY_DN86601_c0_g1
TRINITY_DN45545_c2_g1
TRINITY_DN45569_c2_g1
TRINITY_DN45560_c0_g1
TRINITY_DN45575_c2_g2
TRINITY_DN45575_c2_g8
TRINITY_DN45575_c2_g9
TRINITY_DN45533_c0_g3
TRINITY_DN36155_c0_g1
TRINITY_DN36111_c0_g1
TRINITY_DN36166_c0_g1
TRINITY_DN36198_c0_g1
TRINITY_DN98125_c0_g1
TRINITY_DN98127_c0_g1
TRINITY_DN71105_c0_g1
TRINITY_DN40752_c0_g2
TRINITY_DN40774_c0_g2
TRINITY_DN51043_c0_g1
TRINITY_DN51060_c9_g1
TRINITY_DN51058_c0_g1
TRINITY_DN51022_c4_g1
TRINITY_DN51068_c2_g1
TRINITY_DN94221_c0_g1
TRINITY_DN94218_c0_g1
TRINITY_DN49597_c0_g1
TRINITY_DN49512_c0_g1
TRINITY_DN49545_c1_g1
TRINITY_DN49573_c1_g5
TRINITY_DN49580_c1_g1
TRINITY_DN76473_c0_g1
TRINITY_DN16649_c0_g1
TRINITY_DN94368_c0_g1
TRINITY_DN94387_c0_g1
TRINITY_DN80714_c0_g1
TRINITY_DN64416_c0_g1
TRINITY_DN64454_c0_g1
TRINITY_DN64480_c0_g1
TRINITY_DN83550_c0_g1
TRINITY_DN83561_c0_g1
TRINITY_DN52197_c1_g1
TRINITY_DN52197_c1_g2
TRINITY_DN52165_c0_g4
TRINITY_DN52133_c0_g1
TRINITY_DN52133_c1_g2
TRINITY_DN52133_c2_g1
TRINITY_DN52133_c7_g2
TRINITY_DN52133_c8_g1
TRINITY_DN52133_c8_g6
TRINITY_DN52133_c14_g1
TRINITY_DN52172_c1_g1
TRINITY_DN56073_c0_g1
TRINITY_DN75563_c0_g1
TRINITY_DN22954_c0_g1
TRINITY_DN22924_c0_g1
TRINITY_DN22906_c0_g2
TRINITY_DN69885_c0_g1
TRINITY_DN69847_c0_g1
TRINITY_DN18127_c0_g1
TRINITY_DN18176_c0_g1
TRINITY_DN48831_c2_g1
TRINITY_DN48866_c0_g1
TRINITY_DN48866_c0_g3
TRINITY_DN48868_c0_g1
TRINITY_DN48807_c0_g2
TRINITY_DN48884_c0_g1
TRINITY_DN64844_c0_g1
TRINITY_DN81353_c0_g1
TRINITY_DN51301_c2_g1
TRINITY_DN51341_c1_g4
TRINITY_DN51392_c0_g3
TRINITY_DN51392_c0_g4
TRINITY_DN51314_c1_g1
TRINITY_DN51357_c3_g1
TRINITY_DN51393_c0_g1
TRINITY_DN51393_c0_g3
TRINITY_DN51321_c0_g1
TRINITY_DN68124_c0_g1
TRINITY_DN44489_c1_g1
TRINITY_DN44475_c0_g1
TRINITY_DN44412_c0_g1
TRINITY_DN6753_c0_g1
TRINITY_DN6708_c0_g1
TRINITY_DN85963_c0_g1
TRINITY_DN63804_c0_g1
TRINITY_DN63872_c0_g1
TRINITY_DN63837_c0_g1
TRINITY_DN85238_c0_g1
TRINITY_DN85227_c0_g1
TRINITY_DN50078_c0_g1
TRINITY_DN50082_c0_g2
TRINITY_DN50082_c3_g3
TRINITY_DN50064_c0_g1
TRINITY_DN66597_c0_g1
TRINITY_DN66544_c0_g1
TRINITY_DN10397_c0_g1
TRINITY_DN10360_c0_g1
TRINITY_DN50160_c0_g2
TRINITY_DN50183_c1_g7
TRINITY_DN50125_c1_g4
TRINITY_DN50172_c0_g4
TRINITY_DN50190_c2_g2
TRINITY_DN50192_c1_g2
TRINITY_DN50115_c0_g1
TRINITY_DN50128_c1_g1
TRINITY_DN50141_c1_g1
TRINITY_DN50118_c0_g1
TRINITY_DN48600_c0_g2
TRINITY_DN48614_c1_g1
TRINITY_DN48627_c0_g4
TRINITY_DN72362_c0_g1
TRINITY_DN73124_c0_g1
TRINITY_DN73180_c0_g1
TRINITY_DN35016_c0_g1
TRINITY_DN35019_c0_g1
TRINITY_DN35028_c0_g1
TRINITY_DN35028_c1_g1
TRINITY_DN35085_c0_g1
TRINITY_DN82584_c0_g1
TRINITY_DN82513_c0_g1
TRINITY_DN82546_c0_g1
TRINITY_DN82550_c0_g1
TRINITY_DN37546_c0_g1
TRINITY_DN37565_c0_g1
TRINITY_DN37588_c0_g1
TRINITY_DN37542_c3_g1
TRINITY_DN37568_c0_g2
TRINITY_DN9294_c0_g1
TRINITY_DN9256_c0_g1
TRINITY_DN9239_c0_g2
TRINITY_DN9284_c0_g1
TRINITY_DN46718_c4_g1
TRINITY_DN46718_c7_g1
TRINITY_DN46780_c4_g1
TRINITY_DN46780_c7_g5
TRINITY_DN46780_c7_g2
TRINITY_DN12836_c0_g1
TRINITY_DN31572_c0_g1
TRINITY_DN31573_c0_g2
TRINITY_DN31547_c0_g1
TRINITY_DN42039_c0_g2
TRINITY_DN42054_c0_g1
TRINITY_DN42051_c0_g2
TRINITY_DN42027_c0_g1
TRINITY_DN42816_c0_g2
TRINITY_DN42850_c0_g1
TRINITY_DN42805_c0_g1
TRINITY_DN42855_c1_g1
TRINITY_DN58868_c0_g1
TRINITY_DN58861_c0_g1
TRINITY_DN58872_c0_g1
TRINITY_DN1025_c0_g1
TRINITY_DN1075_c0_g1
TRINITY_DN49092_c2_g3
TRINITY_DN49074_c0_g1
TRINITY_DN49003_c2_g1
TRINITY_DN49030_c9_g2
TRINITY_DN49011_c3_g3
TRINITY_DN49006_c0_g3
TRINITY_DN49038_c0_g3
TRINITY_DN49050_c8_g2
TRINITY_DN49066_c1_g2
TRINITY_DN49066_c1_g3
TRINITY_DN49083_c1_g2
TRINITY_DN49070_c0_g1
TRINITY_DN3872_c0_g1
TRINITY_DN32317_c0_g1
TRINITY_DN32388_c0_g1
TRINITY_DN32332_c0_g1
TRINITY_DN97016_c0_g1
TRINITY_DN37085_c1_g1
TRINITY_DN37074_c0_g1
TRINITY_DN37001_c0_g1
TRINITY_DN89943_c0_g1
TRINITY_DN10772_c0_g1
TRINITY_DN10700_c0_g1
TRINITY_DN57154_c0_g1
TRINITY_DN57164_c0_g1
TRINITY_DN60993_c0_g1
TRINITY_DN60956_c0_g1
TRINITY_DN60965_c0_g1
TRINITY_DN67941_c0_g1
TRINITY_DN93011_c0_g1
TRINITY_DN93090_c0_g1
TRINITY_DN93061_c0_g1
TRINITY_DN93026_c0_g1
TRINITY_DN79818_c0_g1
TRINITY_DN79835_c0_g1
TRINITY_DN26506_c0_g1
TRINITY_DN26576_c0_g1
TRINITY_DN32498_c0_g1
TRINITY_DN32474_c0_g1
TRINITY_DN92840_c0_g1
TRINITY_DN92833_c0_g1
TRINITY_DN92836_c0_g1
TRINITY_DN92894_c0_g1
TRINITY_DN37692_c0_g1
TRINITY_DN37698_c0_g1
TRINITY_DN88719_c0_g1
TRINITY_DN88705_c0_g1
TRINITY_DN41735_c0_g1
TRINITY_DN41703_c0_g1
TRINITY_DN41769_c1_g1
TRINITY_DN41727_c0_g1
TRINITY_DN41702_c0_g1
TRINITY_DN7702_c0_g1
TRINITY_DN7720_c0_g1
TRINITY_DN83303_c0_g1
TRINITY_DN36929_c0_g1
TRINITY_DN36939_c0_g1
TRINITY_DN36956_c0_g1
TRINITY_DN36932_c0_g1
TRINITY_DN36994_c0_g1
TRINITY_DN98486_c0_g1
TRINITY_DN20343_c0_g1
TRINITY_DN20399_c0_g1
TRINITY_DN29375_c0_g1
TRINITY_DN29346_c0_g1
TRINITY_DN29319_c1_g1
TRINITY_DN71741_c0_g1
TRINITY_DN71772_c0_g1
TRINITY_DN46687_c0_g2
TRINITY_DN46638_c0_g1
TRINITY_DN46678_c1_g2
TRINITY_DN46642_c1_g2
TRINITY_DN46642_c1_g1
TRINITY_DN46642_c2_g2
TRINITY_DN46642_c2_g6
TRINITY_DN46642_c2_g7
TRINITY_DN46613_c0_g1
TRINITY_DN90092_c0_g1
TRINITY_DN90058_c0_g1
TRINITY_DN90099_c0_g1
TRINITY_DN5111_c0_g1
TRINITY_DN98873_c0_g1
TRINITY_DN20021_c0_g1
TRINITY_DN20097_c0_g1
TRINITY_DN2191_c0_g1
TRINITY_DN2136_c0_g1
TRINITY_DN36422_c0_g1
TRINITY_DN36406_c0_g1
TRINITY_DN45793_c0_g1
TRINITY_DN45759_c0_g1
TRINITY_DN45700_c2_g1
TRINITY_DN45719_c0_g1
TRINITY_DN45771_c0_g1
TRINITY_DN72621_c0_g1
TRINITY_DN80292_c0_g1
TRINITY_DN75358_c0_g1
TRINITY_DN75375_c0_g1
TRINITY_DN33457_c0_g2
TRINITY_DN65389_c0_g1
TRINITY_DN24068_c0_g1
TRINITY_DN24037_c0_g1
TRINITY_DN24047_c0_g1
TRINITY_DN41627_c0_g1
TRINITY_DN79421_c0_g1
TRINITY_DN79423_c0_g1
TRINITY_DN49494_c5_g2
TRINITY_DN49443_c0_g2
TRINITY_DN49483_c1_g2
TRINITY_DN49435_c0_g3
TRINITY_DN31684_c0_g1
TRINITY_DN31657_c0_g1
TRINITY_DN31674_c0_g1
TRINITY_DN31642_c0_g1
TRINITY_DN30261_c0_g1
TRINITY_DN41244_c1_g1
TRINITY_DN37445_c0_g1
TRINITY_DN37425_c0_g1
TRINITY_DN69573_c0_g1
TRINITY_DN321_c0_g1
TRINITY_DN17826_c0_g1
TRINITY_DN17828_c0_g1
TRINITY_DN59239_c0_g1
TRINITY_DN17727_c0_g1
TRINITY_DN17711_c0_g1
TRINITY_DN17786_c0_g1
TRINITY_DN2273_c0_g1
TRINITY_DN215_c0_g1
TRINITY_DN97549_c0_g1
TRINITY_DN97558_c0_g1
TRINITY_DN101299_c0_g1
TRINITY_DN101297_c0_g1
TRINITY_DN101676_c0_g1
TRINITY_DN101646_c0_g1
TRINITY_DN102416_c0_g1
TRINITY_DN100231_c0_g1
TRINITY_DN102106_c0_g1
TRINITY_DN100950_c0_g1
TRINITY_DN100968_c1_g1
TRINITY_DN101116_c0_g1
TRINITY_DN101183_c0_g1
TRINITY_DN101943_c0_g1
TRINITY_DN101926_c0_g1
TRINITY_DN102623_c0_g1
TRINITY_DN101705_c0_g1
TRINITY_DN101729_c0_g1
TRINITY_DN100353_c0_g1
TRINITY_DN100776_c0_g1
TRINITY_DN100789_c0_g1
TRINITY_DN100735_c0_g1
TRINITY_DN101302_c0_g1
TRINITY_DN101499_c0_g1
TRINITY_DN100597_c0_g1
TRINITY_DN100406_c0_g1
TRINITY_DN101009_c0_g1
TRINITY_DN102265_c0_g1
TRINITY_DN100841_c0_g1
TRINITY_DN100827_c0_g1
TRINITY_DN102090_c0_g1
TRINITY_DN102026_c0_g1
TRINITY_DN46362_c1_g1
TRINITY_DN46344_c0_g1
TRINITY_DN46397_c0_g3
TRINITY_DN46320_c4_g1
TRINITY_DN46336_c0_g1
TRINITY_DN28639_c0_g1
TRINITY_DN62397_c0_g1
TRINITY_DN62369_c0_g1
TRINITY_DN71547_c0_g1
TRINITY_DN71565_c0_g1
TRINITY_DN38072_c0_g1
TRINITY_DN38070_c0_g1
TRINITY_DN38033_c0_g1
TRINITY_DN38009_c0_g2
TRINITY_DN38022_c0_g1
TRINITY_DN84828_c0_g1
TRINITY_DN84805_c0_g1
TRINITY_DN4493_c0_g1
TRINITY_DN34250_c0_g1
TRINITY_DN34218_c1_g1
TRINITY_DN34254_c0_g1
TRINITY_DN34277_c0_g1
TRINITY_DN59008_c0_g1
TRINITY_DN36524_c0_g1
TRINITY_DN81250_c0_g1
TRINITY_DN86068_c0_g1
TRINITY_DN87469_c0_g1
TRINITY_DN87489_c0_g1
TRINITY_DN87488_c0_g1
TRINITY_DN87439_c0_g1
TRINITY_DN36823_c0_g1
TRINITY_DN32583_c0_g1
TRINITY_DN32562_c1_g2
TRINITY_DN32510_c0_g1
TRINITY_DN44547_c0_g1
TRINITY_DN44595_c1_g1
TRINITY_DN44595_c1_g3
TRINITY_DN44570_c1_g1
TRINITY_DN47096_c0_g1
TRINITY_DN47093_c0_g1
TRINITY_DN47036_c1_g1
TRINITY_DN47097_c0_g1
TRINITY_DN47039_c0_g1
TRINITY_DN47080_c5_g2
TRINITY_DN47080_c5_g1
TRINITY_DN39739_c0_g2
TRINITY_DN39724_c0_g2
TRINITY_DN39706_c0_g1
TRINITY_DN88479_c0_g1
TRINITY_DN94660_c0_g1
TRINITY_DN94608_c0_g1
TRINITY_DN94685_c0_g1
TRINITY_DN10474_c0_g1
TRINITY_DN10428_c0_g1
TRINITY_DN29109_c0_g2
TRINITY_DN21282_c0_g1
TRINITY_DN21246_c0_g1
TRINITY_DN21249_c0_g1
TRINITY_DN57502_c0_g1
TRINITY_DN57512_c0_g1
TRINITY_DN7229_c0_g1
TRINITY_DN43233_c0_g1
TRINITY_DN43252_c0_g2
TRINITY_DN99183_c0_g1
TRINITY_DN41_c0_g1
TRINITY_DN32_c0_g1
TRINITY_DN74359_c0_g1
TRINITY_DN76090_c0_g1
TRINITY_DN46005_c0_g2
TRINITY_DN46094_c4_g2
TRINITY_DN46025_c0_g1
TRINITY_DN46039_c6_g3
TRINITY_DN46009_c4_g3
TRINITY_DN46009_c5_g1
TRINITY_DN46009_c5_g3
TRINITY_DN7913_c0_g1
TRINITY_DN7934_c0_g1
TRINITY_DN7953_c0_g1
TRINITY_DN29701_c0_g1
TRINITY_DN29710_c0_g2
TRINITY_DN83752_c0_g1
TRINITY_DN83758_c0_g1
TRINITY_DN83765_c0_g1
TRINITY_DN71906_c0_g1
TRINITY_DN3579_c0_g1
TRINITY_DN3570_c0_g1
TRINITY_DN3538_c0_g2
TRINITY_DN3522_c0_g1
TRINITY_DN29218_c0_g1
TRINITY_DN29202_c0_g2
TRINITY_DN29258_c0_g1
TRINITY_DN2631_c0_g2
TRINITY_DN17167_c0_g1
TRINITY_DN93502_c0_g1
TRINITY_DN16208_c0_g1
TRINITY_DN16247_c0_g1
TRINITY_DN58569_c0_g1
TRINITY_DN69344_c0_g1
TRINITY_DN69326_c0_g1
TRINITY_DN69356_c0_g1
TRINITY_DN1804_c0_g1
TRINITY_DN1824_c0_g1
TRINITY_DN60638_c0_g1
TRINITY_DN60631_c0_g1
TRINITY_DN60681_c0_g1
TRINITY_DN27235_c0_g1
TRINITY_DN27206_c0_g1
TRINITY_DN38283_c1_g1
TRINITY_DN38290_c0_g1
TRINITY_DN38268_c0_g1
TRINITY_DN34343_c0_g1
TRINITY_DN34343_c1_g1
TRINITY_DN34389_c0_g1
TRINITY_DN34358_c0_g1
TRINITY_DN1589_c0_g1
TRINITY_DN1560_c0_g1
TRINITY_DN75292_c0_g1
TRINITY_DN75206_c0_g1
TRINITY_DN89786_c0_g1
TRINITY_DN89759_c0_g1
TRINITY_DN89782_c0_g1
TRINITY_DN59938_c0_g1
TRINITY_DN27713_c0_g1
TRINITY_DN27708_c1_g1
TRINITY_DN79752_c0_g1
TRINITY_DN79796_c0_g1
TRINITY_DN79773_c0_g1
TRINITY_DN99495_c0_g1
TRINITY_DN99473_c0_g1
TRINITY_DN34507_c0_g1
TRINITY_DN34507_c0_g2
TRINITY_DN34524_c0_g1
TRINITY_DN34532_c0_g1
TRINITY_DN58713_c0_g1
TRINITY_DN58753_c0_g1
TRINITY_DN40415_c0_g1
TRINITY_DN40459_c0_g1
TRINITY_DN40452_c1_g1
TRINITY_DN40477_c0_g2
TRINITY_DN40435_c0_g2
TRINITY_DN40489_c0_g1
TRINITY_DN195_c0_g1
TRINITY_DN179_c0_g1
TRINITY_DN124_c0_g1
TRINITY_DN80031_c0_g1
TRINITY_DN54833_c0_g1
TRINITY_DN54854_c0_g1
TRINITY_DN54879_c0_g1
TRINITY_DN54870_c0_g1
TRINITY_DN54888_c0_g1
TRINITY_DN18036_c0_g1
TRINITY_DN58280_c0_g1
TRINITY_DN89032_c0_g1
TRINITY_DN89004_c0_g1
TRINITY_DN89038_c0_g1
TRINITY_DN67333_c0_g1
TRINITY_DN67311_c0_g1
TRINITY_DN28301_c0_g1
TRINITY_DN28346_c0_g1
TRINITY_DN48282_c1_g1
TRINITY_DN48241_c3_g2
TRINITY_DN48255_c4_g2
TRINITY_DN48214_c0_g2
TRINITY_DN48239_c0_g2
TRINITY_DN48239_c0_g8
TRINITY_DN21382_c0_g1
TRINITY_DN40367_c0_g1
TRINITY_DN53575_c0_g1
TRINITY_DN53509_c0_g1
TRINITY_DN50636_c2_g1
TRINITY_DN50613_c1_g1
TRINITY_DN50651_c1_g2
TRINITY_DN50671_c0_g2
TRINITY_DN50674_c0_g1
TRINITY_DN50603_c1_g1
TRINITY_DN50687_c3_g1
TRINITY_DN43095_c0_g1
TRINITY_DN43058_c0_g1
TRINITY_DN43004_c0_g1
TRINITY_DN43016_c1_g1
TRINITY_DN43086_c0_g1
TRINITY_DN23121_c0_g1
TRINITY_DN79159_c0_g1
TRINITY_DN69118_c0_g1
TRINITY_DN69127_c0_g1
TRINITY_DN5951_c0_g1
TRINITY_DN6965_c0_g1
TRINITY_DN75844_c0_g1
TRINITY_DN46427_c0_g1
TRINITY_DN46412_c1_g2
TRINITY_DN73240_c0_g1
TRINITY_DN73241_c0_g1
TRINITY_DN21696_c0_g1
TRINITY_DN21680_c0_g1
TRINITY_DN21611_c0_g1
TRINITY_DN45649_c0_g1
TRINITY_DN45686_c8_g2
TRINITY_DN8673_c0_g1
TRINITY_DN8685_c0_g1
TRINITY_DN10634_c0_g1
TRINITY_DN10699_c0_g1
TRINITY_DN10628_c0_g1
TRINITY_DN15388_c0_g1
TRINITY_DN38898_c0_g1
TRINITY_DN5068_c0_g1
TRINITY_DN5018_c0_g1
TRINITY_DN97628_c0_g1
TRINITY_DN97609_c0_g1
TRINITY_DN48006_c0_g2
TRINITY_DN48027_c0_g3
TRINITY_DN48068_c0_g2
TRINITY_DN48037_c0_g1
TRINITY_DN46927_c0_g1
TRINITY_DN46934_c0_g1
TRINITY_DN72804_c0_g1
TRINITY_DN47409_c1_g1
TRINITY_DN47429_c5_g2
TRINITY_DN47461_c0_g1
TRINITY_DN47442_c3_g1
TRINITY_DN47442_c9_g1
TRINITY_DN33543_c0_g1
TRINITY_DN33533_c0_g1
TRINITY_DN33577_c0_g1
TRINITY_DN99512_c0_g1
TRINITY_DN99579_c0_g1
TRINITY_DN99509_c0_g1
TRINITY_DN99502_c0_g1
TRINITY_DN54305_c0_g1
TRINITY_DN56539_c0_g1
TRINITY_DN60068_c0_g1
TRINITY_DN50804_c0_g1
TRINITY_DN50856_c0_g1
TRINITY_DN50856_c1_g3
TRINITY_DN50871_c0_g1
TRINITY_DN50851_c0_g4
TRINITY_DN50809_c0_g1
TRINITY_DN99793_c0_g1
TRINITY_DN32813_c0_g1
TRINITY_DN32823_c0_g1
TRINITY_DN76125_c0_g1
TRINITY_DN76189_c0_g1
TRINITY_DN19622_c0_g1
TRINITY_DN54508_c0_g1
TRINITY_DN41839_c0_g1
TRINITY_DN41881_c1_g1
TRINITY_DN41828_c1_g1
TRINITY_DN41890_c0_g2
TRINITY_DN5746_c0_g1
TRINITY_DN5798_c0_g1
TRINITY_DN42785_c0_g1
TRINITY_DN42742_c0_g1
TRINITY_DN42700_c0_g1
TRINITY_DN42721_c0_g1
TRINITY_DN42762_c0_g1
TRINITY_DN80530_c0_g1
TRINITY_DN15640_c0_g1
TRINITY_DN15619_c0_g1
TRINITY_DN92005_c0_g1
TRINITY_DN26924_c0_g1
TRINITY_DN26937_c0_g1
TRINITY_DN26959_c0_g1
TRINITY_DN67112_c0_g1
TRINITY_DN67113_c0_g1
TRINITY_DN67146_c0_g1
TRINITY_DN15815_c0_g1
TRINITY_DN51160_c0_g6
TRINITY_DN51114_c4_g3
TRINITY_DN51119_c0_g1
TRINITY_DN51194_c0_g1
TRINITY_DN51183_c0_g3
TRINITY_DN51149_c3_g2
TRINITY_DN51199_c4_g2
TRINITY_DN51199_c4_g4
TRINITY_DN51199_c5_g3
TRINITY_DN51199_c5_g4
TRINITY_DN51136_c3_g1
TRINITY_DN51191_c1_g3
TRINITY_DN40653_c0_g1
TRINITY_DN40696_c0_g1
TRINITY_DN2313_c0_g1
TRINITY_DN81145_c0_g1
TRINITY_DN81130_c0_g1
TRINITY_DN81192_c0_g1
TRINITY_DN81168_c0_g1
TRINITY_DN81129_c0_g1
TRINITY_DN25904_c0_g1
TRINITY_DN25952_c0_g1
TRINITY_DN25963_c0_g1
TRINITY_DN25911_c0_g1
TRINITY_DN1785_c0_g1
TRINITY_DN59861_c0_g1
TRINITY_DN93133_c0_g1
TRINITY_DN41938_c0_g1
TRINITY_DN38193_c0_g1
TRINITY_DN94844_c0_g1
TRINITY_DN94875_c0_g1
TRINITY_DN5417_c0_g1
TRINITY_DN23899_c0_g1
TRINITY_DN23811_c0_g1
TRINITY_DN43706_c1_g4
TRINITY_DN43732_c0_g1
TRINITY_DN43723_c0_g1
TRINITY_DN43725_c2_g1
TRINITY_DN43703_c0_g1
TRINITY_DN94779_c0_g1
TRINITY_DN94747_c0_g1
TRINITY_DN28044_c0_g1
TRINITY_DN28095_c0_g2
TRINITY_DN68346_c0_g1
TRINITY_DN39102_c0_g1
TRINITY_DN39125_c0_g1
TRINITY_DN38926_c0_g1
TRINITY_DN38996_c0_g1
TRINITY_DN38941_c0_g1
TRINITY_DN38978_c0_g2
TRINITY_DN38978_c0_g3
TRINITY_DN38989_c0_g1
TRINITY_DN44122_c0_g2
TRINITY_DN44168_c0_g1
TRINITY_DN27331_c0_g1
TRINITY_DN27331_c1_g1
TRINITY_DN27383_c0_g1
TRINITY_DN88869_c0_g1
TRINITY_DN88872_c0_g1
TRINITY_DN88875_c0_g1
TRINITY_DN61336_c0_g1
TRINITY_DN67675_c0_g1
TRINITY_DN67625_c0_g1
TRINITY_DN67621_c0_g1
TRINITY_DN16857_c0_g1
TRINITY_DN42599_c0_g1
TRINITY_DN42598_c0_g1
TRINITY_DN42596_c0_g2
TRINITY_DN42514_c0_g1
TRINITY_DN42526_c0_g1
TRINITY_DN42567_c2_g1
TRINITY_DN39857_c0_g1
TRINITY_DN39823_c0_g1
TRINITY_DN39876_c0_g1
TRINITY_DN39852_c0_g1
TRINITY_DN39841_c0_g1
TRINITY_DN39837_c0_g1
TRINITY_DN51881_c1_g4
TRINITY_DN51866_c1_g1
TRINITY_DN51809_c4_g6
TRINITY_DN51823_c3_g1
TRINITY_DN51865_c2_g1
TRINITY_DN51864_c1_g1
TRINITY_DN51842_c0_g3
TRINITY_DN51874_c2_g1
TRINITY_DN67418_c0_g1
TRINITY_DN5811_c0_g1
TRINITY_DN5844_c0_g1
TRINITY_DN5887_c0_g1
TRINITY_DN5887_c0_g2
TRINITY_DN3374_c0_g1
TRINITY_DN3395_c0_g1
TRINITY_DN15730_c0_g1
TRINITY_DN15711_c0_g1
TRINITY_DN22467_c0_g1
TRINITY_DN22405_c0_g1
TRINITY_DN22471_c0_g1
TRINITY_DN3748_c0_g1
TRINITY_DN55563_c0_g1
TRINITY_DN24280_c0_g1
TRINITY_DN63199_c0_g1
TRINITY_DN81511_c0_g1
TRINITY_DN81541_c0_g1
TRINITY_DN9553_c1_g1
TRINITY_DN71852_c0_g1
TRINITY_DN34677_c0_g1
TRINITY_DN34642_c0_g2
TRINITY_DN69969_c0_g1
TRINITY_DN69939_c0_g1
TRINITY_DN41594_c0_g1
TRINITY_DN41562_c0_g3
TRINITY_DN41591_c1_g1
TRINITY_DN41591_c2_g2
TRINITY_DN41591_c2_g1
TRINITY_DN41510_c0_g1
TRINITY_DN41510_c1_g1
TRINITY_DN81886_c0_g1
TRINITY_DN81836_c0_g1
TRINITY_DN18784_c0_g1
TRINITY_DN18797_c0_g1
TRINITY_DN18731_c0_g1
TRINITY_DN96960_c0_g1
TRINITY_DN96979_c0_g1
TRINITY_DN32078_c0_g1
TRINITY_DN32043_c0_g1
TRINITY_DN32030_c0_g1
TRINITY_DN11695_c0_g1
TRINITY_DN98908_c0_g1
TRINITY_DN98935_c0_g1
TRINITY_DN82263_c0_g1
TRINITY_DN6412_c0_g1
TRINITY_DN40267_c1_g1
TRINITY_DN47168_c2_g1
TRINITY_DN47196_c1_g1
TRINITY_DN10279_c0_g1
TRINITY_DN10242_c0_g1
TRINITY_DN10291_c0_g1
TRINITY_DN10248_c0_g1
TRINITY_DN61139_c0_g1
TRINITY_DN76744_c0_g1
TRINITY_DN67031_c0_g1
TRINITY_DN67094_c0_g1
TRINITY_DN26850_c0_g1
TRINITY_DN26834_c0_g1
TRINITY_DN26866_c0_g1
TRINITY_DN38730_c1_g1
TRINITY_DN38765_c0_g1
TRINITY_DN4540_c0_g1
TRINITY_DN4590_c0_g1
TRINITY_DN75972_c0_g1
TRINITY_DN75979_c0_g1
TRINITY_DN29469_c0_g1
TRINITY_DN29485_c0_g2
TRINITY_DN49269_c2_g1
TRINITY_DN49260_c3_g2
TRINITY_DN49203_c0_g1
TRINITY_DN49228_c0_g3
TRINITY_DN49275_c0_g6
TRINITY_DN49234_c5_g4
TRINITY_DN49246_c2_g2
TRINITY_DN62236_c0_g1
TRINITY_DN62290_c0_g1
TRINITY_DN60129_c0_g1
TRINITY_DN60136_c0_g1
TRINITY_DN14750_c0_g1
TRINITY_DN46177_c0_g1
TRINITY_DN46121_c0_g1
TRINITY_DN46189_c1_g1
TRINITY_DN46142_c1_g5
TRINITY_DN46142_c2_g1
TRINITY_DN46180_c0_g1
TRINITY_DN46111_c0_g1
TRINITY_DN46192_c3_g1
TRINITY_DN96022_c0_g1
TRINITY_DN96096_c0_g1
TRINITY_DN3085_c0_g1
TRINITY_DN18303_c0_g1
TRINITY_DN4152_c0_g2
TRINITY_DN4199_c0_g1
TRINITY_DN4103_c0_g1
TRINITY_DN86867_c0_g1
TRINITY_DN77075_c0_g1
TRINITY_DN77040_c0_g1
TRINITY_DN70298_c0_g1
TRINITY_DN92991_c0_g1
TRINITY_DN92967_c0_g1
TRINITY_DN71354_c0_g1
TRINITY_DN71304_c0_g1
TRINITY_DN71360_c0_g1
TRINITY_DN91300_c0_g1
TRINITY_DN25438_c0_g1
TRINITY_DN25419_c0_g1
TRINITY_DN25423_c0_g1
TRINITY_DN25482_c0_g2
TRINITY_DN25442_c0_g1
TRINITY_DN25456_c0_g1
TRINITY_DN75065_c0_g1
TRINITY_DN75026_c0_g1
TRINITY_DN87268_c0_g1
TRINITY_DN15065_c0_g1
TRINITY_DN87879_c0_g1
TRINITY_DN87829_c0_g1
TRINITY_DN16495_c0_g1
TRINITY_DN28725_c0_g1
TRINITY_DN7417_c0_g1
TRINITY_DN56104_c0_g1
TRINITY_DN56169_c0_g1
TRINITY_DN56139_c0_g1
TRINITY_DN73549_c0_g1
TRINITY_DN78661_c0_g1
TRINITY_DN83416_c0_g1
TRINITY_DN91762_c0_g1
TRINITY_DN2545_c0_g1
TRINITY_DN35460_c0_g1
TRINITY_DN35449_c1_g2
TRINITY_DN35486_c0_g1
TRINITY_DN45924_c0_g1
TRINITY_DN45925_c2_g2
TRINITY_DN45925_c2_g1
TRINITY_DN45925_c2_g5
TRINITY_DN87660_c0_g1
TRINITY_DN87639_c0_g1
TRINITY_DN17618_c0_g1
TRINITY_DN17684_c0_g1
TRINITY_DN17657_c0_g1
TRINITY_DN9908_c0_g1
TRINITY_DN80842_c0_g1
TRINITY_DN80838_c0_g1
TRINITY_DN68204_c0_g1
TRINITY_DN64166_c0_g1
TRINITY_DN64150_c0_g1
TRINITY_DN37776_c0_g1
TRINITY_DN37794_c0_g1
TRINITY_DN37762_c0_g1
TRINITY_DN26690_c0_g1
TRINITY_DN31406_c0_g1
TRINITY_DN31460_c0_g1
TRINITY_DN35207_c1_g1
TRINITY_DN35210_c0_g1
TRINITY_DN35284_c0_g1
TRINITY_DN1261_c0_g1
TRINITY_DN1253_c0_g1
TRINITY_DN1207_c0_g1
TRINITY_DN18694_c0_g1
TRINITY_DN24660_c0_g1
TRINITY_DN24609_c0_g1
TRINITY_DN24668_c0_g1
TRINITY_DN4085_c0_g1
TRINITY_DN8425_c0_g1
TRINITY_DN8412_c0_g1
TRINITY_DN8407_c0_g1
TRINITY_DN57371_c0_g1
TRINITY_DN57352_c0_g1
TRINITY_DN57372_c0_g1
TRINITY_DN17949_c0_g1
TRINITY_DN17921_c0_g1
TRINITY_DN17906_c0_g1
TRINITY_DN34738_c0_g1
TRINITY_DN34725_c0_g1
TRINITY_DN34747_c0_g1
TRINITY_DN34708_c0_g1
TRINITY_DN34728_c0_g1
TRINITY_DN59164_c0_g1
TRINITY_DN88928_c0_g1
TRINITY_DN38437_c0_g1
TRINITY_DN38425_c0_g1
TRINITY_DN38471_c0_g1
TRINITY_DN57927_c0_g1
TRINITY_DN57996_c0_g1
TRINITY_DN31709_c0_g1
TRINITY_DN31785_c0_g1
TRINITY_DN31799_c0_g1
TRINITY_DN31768_c0_g1
TRINITY_DN31749_c0_g1
TRINITY_DN31780_c0_g2
TRINITY_DN79547_c0_g1
TRINITY_DN79582_c0_g1
TRINITY_DN39618_c0_g2
TRINITY_DN39618_c0_g1
TRINITY_DN29598_c0_g1
TRINITY_DN62107_c0_g1
TRINITY_DN36712_c0_g1
TRINITY_DN36778_c0_g1
TRINITY_DN81020_c0_g1
TRINITY_DN81064_c0_g1
TRINITY_DN74217_c0_g1
TRINITY_DN23938_c0_g1
TRINITY_DN97942_c0_g1
TRINITY_DN75751_c0_g1
TRINITY_DN24962_c0_g1
TRINITY_DN24983_c0_g1
TRINITY_DN24939_c0_g1
TRINITY_DN24960_c0_g1
TRINITY_DN44617_c1_g4
TRINITY_DN22816_c0_g1
TRINITY_DN22835_c0_g1
TRINITY_DN94502_c0_g1
TRINITY_DN37269_c0_g1
TRINITY_DN44069_c0_g2
TRINITY_DN44094_c1_g1
TRINITY_DN86715_c0_g1
TRINITY_DN86760_c0_g1
TRINITY_DN96836_c0_g1
TRINITY_DN22109_c0_g1
TRINITY_DN22119_c0_g1
TRINITY_DN46841_c2_g3
TRINITY_DN46854_c0_g1
TRINITY_DN46896_c1_g1
TRINITY_DN46826_c0_g1
TRINITY_DN58408_c0_g1
TRINITY_DN58420_c0_g1
TRINITY_DN58468_c0_g1
TRINITY_DN36353_c0_g1
TRINITY_DN36307_c0_g1
TRINITY_DN36364_c0_g1
TRINITY_DN36369_c1_g1
TRINITY_DN52409_c10_g6
TRINITY_DN52404_c8_g1
TRINITY_DN52443_c4_g3
TRINITY_DN52443_c4_g4
TRINITY_DN52438_c3_g2
TRINITY_DN52434_c1_g3
TRINITY_DN52472_c2_g1
TRINITY_DN52448_c5_g1
TRINITY_DN52440_c1_g2
TRINITY_DN32721_c0_g2
TRINITY_DN32749_c1_g1
TRINITY_DN27452_c0_g1
TRINITY_DN24862_c1_g1
TRINITY_DN24886_c0_g1
TRINITY_DN24872_c0_g1
TRINITY_DN24899_c0_g1
TRINITY_DN66052_c0_g1
TRINITY_DN38509_c0_g1
TRINITY_DN38583_c0_g1
TRINITY_DN38515_c0_g2
TRINITY_DN38577_c0_g1
TRINITY_DN38562_c0_g1
TRINITY_DN12379_c0_g1
TRINITY_DN95276_c0_g1
TRINITY_DN35875_c1_g1
TRINITY_DN35871_c0_g1
TRINITY_DN35863_c0_g1
TRINITY_DN35853_c0_g1
TRINITY_DN63673_c0_g1
TRINITY_DN63687_c0_g1
TRINITY_DN85108_c0_g1
TRINITY_DN14372_c0_g1
TRINITY_DN14315_c0_g1
TRINITY_DN64681_c0_g1
TRINITY_DN13868_c0_g1
TRINITY_DN13808_c1_g1
TRINITY_DN13854_c0_g1
TRINITY_DN14933_c0_g1
TRINITY_DN14959_c0_g1
TRINITY_DN99825_c0_g1
TRINITY_DN55975_c0_g1
TRINITY_DN55947_c0_g1
TRINITY_DN8143_c0_g1
TRINITY_DN8163_c0_g1
TRINITY_DN8184_c0_g1
TRINITY_DN72977_c0_g1
TRINITY_DN72975_c0_g1
TRINITY_DN47671_c3_g1
TRINITY_DN47638_c0_g2
TRINITY_DN47689_c0_g3
TRINITY_DN47621_c0_g3
TRINITY_DN47648_c1_g1
TRINITY_DN47681_c6_g1
TRINITY_DN47681_c6_g2
TRINITY_DN47623_c1_g4
TRINITY_DN47667_c0_g1
TRINITY_DN47672_c4_g1
TRINITY_DN47600_c0_g1
TRINITY_DN47633_c3_g1
TRINITY_DN76266_c0_g1
TRINITY_DN8720_c0_g1
TRINITY_DN8791_c0_g1
TRINITY_DN66263_c0_g1
TRINITY_DN66225_c0_g1
TRINITY_DN3493_c0_g1
TRINITY_DN3490_c0_g1
TRINITY_DN3477_c0_g1
TRINITY_DN36040_c0_g1
TRINITY_DN36002_c0_g1
TRINITY_DN68507_c0_g1
TRINITY_DN45225_c7_g1
TRINITY_DN45242_c0_g1
TRINITY_DN45286_c0_g1
TRINITY_DN45228_c0_g1
TRINITY_DN45273_c1_g2
TRINITY_DN78078_c0_g1
[truncated: 112 more rows]

## Sheet: Common in NR Pfam
Common elements in NR Pfam :
TRINITY_DN35692_c0_g1
TRINITY_DN35686_c0_g1
TRINITY_DN35620_c1_g2
TRINITY_DN74980_c0_g1
TRINITY_DN41067_c0_g1
TRINITY_DN39593_c0_g1
TRINITY_DN23075_c0_g1
TRINITY_DN78767_c0_g1
TRINITY_DN99974_c0_g1
TRINITY_DN475_c0_g1
TRINITY_DN476_c0_g1
TRINITY_DN424_c0_g1
TRINITY_DN19373_c0_g1
TRINITY_DN37143_c0_g1
TRINITY_DN37160_c0_g1
TRINITY_DN66419_c0_g1
TRINITY_DN66425_c0_g1
TRINITY_DN53687_c0_g1
TRINITY_DN772_c0_g1
TRINITY_DN2069_c0_g1
TRINITY_DN61754_c0_g1
TRINITY_DN96209_c0_g1
TRINITY_DN83911_c0_g1
TRINITY_DN27588_c0_g2
TRINITY_DN61855_c0_g1
TRINITY_DN64022_c0_g1
TRINITY_DN64047_c0_g1
TRINITY_DN90452_c0_g1
TRINITY_DN71471_c0_g1
TRINITY_DN33089_c0_g1
TRINITY_DN33055_c0_g1
TRINITY_DN1660_c0_g1
TRINITY_DN83002_c0_g1
TRINITY_DN34040_c0_g1
TRINITY_DN27647_c0_g1
TRINITY_DN39957_c0_g1
TRINITY_DN56213_c0_g1
TRINITY_DN56283_c0_g1
TRINITY_DN2916_c0_g1
TRINITY_DN49122_c2_g1
TRINITY_DN49189_c0_g2
TRINITY_DN49189_c0_g1
TRINITY_DN49175_c0_g1
TRINITY_DN49112_c0_g2
TRINITY_DN49153_c0_g2
TRINITY_DN49190_c0_g1
TRINITY_DN49119_c0_g1
TRINITY_DN49117_c0_g1
TRINITY_DN65495_c0_g1
TRINITY_DN65450_c0_g1
TRINITY_DN62790_c0_g1
TRINITY_DN91923_c0_g1
TRINITY_DN78592_c0_g1
TRINITY_DN16180_c0_g1
TRINITY_DN51676_c0_g2
TRINITY_DN51686_c0_g4
TRINITY_DN51624_c0_g1
TRINITY_DN51656_c1_g2
TRINITY_DN51627_c0_g2
TRINITY_DN37860_c0_g1
TRINITY_DN55693_c0_g1
TRINITY_DN32153_c0_g1
TRINITY_DN53316_c0_g1
TRINITY_DN53343_c0_g1
TRINITY_DN53303_c0_g1
TRINITY_DN51759_c1_g1
TRINITY_DN51759_c1_g2
TRINITY_DN51785_c4_g1
TRINITY_DN51785_c5_g1
TRINITY_DN76982_c0_g1
TRINITY_DN76918_c0_g1
TRINITY_DN54951_c0_g1
TRINITY_DN31159_c0_g1
TRINITY_DN31195_c0_g1
TRINITY_DN58631_c0_g1
TRINITY_DN52344_c1_g1
TRINITY_DN52378_c2_g2
TRINITY_DN52355_c0_g2
TRINITY_DN52368_c2_g2
TRINITY_DN52395_c3_g1
TRINITY_DN52395_c3_g3
TRINITY_DN52395_c3_g2
TRINITY_DN52395_c3_g6
TRINITY_DN52395_c3_g5
TRINITY_DN52383_c3_g1
TRINITY_DN52381_c1_g1
TRINITY_DN25163_c0_g1
TRINITY_DN25155_c0_g1
TRINITY_DN25143_c0_g1
TRINITY_DN46561_c0_g1
TRINITY_DN46588_c0_g2
TRINITY_DN46544_c1_g1
TRINITY_DN46569_c1_g1
TRINITY_DN82779_c0_g1
TRINITY_DN39490_c0_g1
TRINITY_DN39429_c0_g1
TRINITY_DN39429_c0_g2
TRINITY_DN52612_c0_g1
TRINITY_DN52615_c0_g1
TRINITY_DN50512_c3_g1
TRINITY_DN50512_c3_g2
TRINITY_DN50543_c0_g1
TRINITY_DN50559_c1_g1
TRINITY_DN50588_c0_g1
TRINITY_DN50501_c0_g2
TRINITY_DN50525_c0_g2
TRINITY_DN50575_c1_g1
TRINITY_DN43860_c0_g2
TRINITY_DN43889_c1_g1
TRINITY_DN43849_c0_g1
TRINITY_DN43852_c0_g1
TRINITY_DN43850_c0_g1
TRINITY_DN47322_c0_g1
TRINITY_DN47306_c0_g1
TRINITY_DN47319_c0_g1
TRINITY_DN24409_c0_g1
TRINITY_DN24470_c0_g1
TRINITY_DN77362_c0_g1
TRINITY_DN77373_c0_g1
TRINITY_DN77381_c0_g1
TRINITY_DN98717_c0_g1
TRINITY_DN98720_c0_g1
TRINITY_DN89254_c0_g1
TRINITY_DN48314_c0_g1
TRINITY_DN48367_c2_g2
TRINITY_DN48367_c2_g1
TRINITY_DN88028_c0_g1
TRINITY_DN88008_c0_g1
TRINITY_DN40087_c0_g1
TRINITY_DN40060_c0_g1
TRINITY_DN40023_c0_g1
TRINITY_DN40067_c0_g1
TRINITY_DN40001_c0_g1
TRINITY_DN62801_c0_g1
TRINITY_DN61454_c0_g1
TRINITY_DN48496_c2_g1
TRINITY_DN48493_c1_g2
TRINITY_DN48498_c0_g1
TRINITY_DN37396_c2_g3
TRINITY_DN33641_c0_g1
TRINITY_DN91180_c0_g1
TRINITY_DN23546_c0_g1
TRINITY_DN23567_c0_g1
TRINITY_DN63496_c0_g1
TRINITY_DN37935_c0_g1
TRINITY_DN52950_c0_g1
TRINITY_DN49883_c2_g3
TRINITY_DN49806_c1_g1
TRINITY_DN49806_c2_g1
TRINITY_DN49802_c0_g1
TRINITY_DN49877_c1_g1
TRINITY_DN49820_c0_g3
TRINITY_DN59435_c0_g1
TRINITY_DN21862_c0_g1
TRINITY_DN47719_c0_g1
TRINITY_DN47711_c0_g1
TRINITY_DN47743_c1_g1
TRINITY_DN47768_c0_g1
TRINITY_DN47773_c0_g1
TRINITY_DN47705_c5_g4
TRINITY_DN56688_c0_g1
TRINITY_DN43369_c0_g1
TRINITY_DN43372_c0_g3
TRINITY_DN43327_c0_g1
TRINITY_DN92651_c0_g1
TRINITY_DN42907_c0_g1
TRINITY_DN9321_c0_g1
TRINITY_DN9377_c0_g1
TRINITY_DN9380_c0_g1
TRINITY_DN24703_c0_g1
TRINITY_DN22267_c0_g1
TRINITY_DN50923_c2_g3
TRINITY_DN50907_c0_g1
TRINITY_DN50971_c0_g2
TRINITY_DN50911_c1_g3
TRINITY_DN50973_c0_g1
TRINITY_DN50938_c0_g1
TRINITY_DN30041_c0_g1
TRINITY_DN63068_c0_g1
TRINITY_DN48114_c0_g1
TRINITY_DN48150_c2_g1
TRINITY_DN48150_c3_g1
TRINITY_DN48198_c0_g2
TRINITY_DN48109_c0_g1
TRINITY_DN48167_c0_g1
TRINITY_DN12477_c0_g1
TRINITY_DN12402_c0_g1
TRINITY_DN30756_c0_g1
TRINITY_DN30774_c0_g1
TRINITY_DN92151_c0_g1
TRINITY_DN92195_c0_g1
TRINITY_DN32931_c0_g1
TRINITY_DN32942_c0_g1
TRINITY_DN32986_c0_g1
TRINITY_DN32937_c0_g1
TRINITY_DN54078_c0_g1
TRINITY_DN70923_c0_g1
TRINITY_DN70907_c0_g1
TRINITY_DN40961_c1_g1
TRINITY_DN40954_c0_g1
TRINITY_DN30845_c0_g1
TRINITY_DN95981_c0_g1
TRINITY_DN55192_c0_g1
TRINITY_DN53498_c0_g1
TRINITY_DN74808_c0_g1
TRINITY_DN43476_c0_g1
TRINITY_DN43421_c0_g1
TRINITY_DN43432_c0_g1
TRINITY_DN43430_c0_g1
TRINITY_DN43477_c0_g1
TRINITY_DN92729_c0_g1
TRINITY_DN92754_c0_g1
TRINITY_DN92741_c0_g1
TRINITY_DN25847_c0_g1
TRINITY_DN48998_c0_g2
TRINITY_DN48940_c0_g1
TRINITY_DN48972_c0_g2
TRINITY_DN48973_c0_g3
TRINITY_DN48973_c0_g2
TRINITY_DN64245_c0_g1
TRINITY_DN64224_c0_g1
TRINITY_DN36251_c0_g1
TRINITY_DN36293_c0_g1
TRINITY_DN80618_c0_g1
TRINITY_DN35752_c0_g1
TRINITY_DN35734_c0_g1
TRINITY_DN35741_c0_g1
TRINITY_DN35726_c0_g1
TRINITY_DN35762_c0_g1
TRINITY_DN35704_c0_g1
TRINITY_DN35744_c0_g1
TRINITY_DN84955_c0_g1
TRINITY_DN84940_c0_g1
TRINITY_DN83263_c0_g1
TRINITY_DN66803_c0_g1
TRINITY_DN80339_c0_g1
TRINITY_DN80324_c0_g1
TRINITY_DN80383_c0_g1
TRINITY_DN42631_c0_g1
TRINITY_DN42648_c0_g1
TRINITY_DN42628_c0_g1
TRINITY_DN30999_c0_g1
TRINITY_DN30993_c1_g1
TRINITY_DN30952_c0_g1
TRINITY_DN30916_c0_g1
TRINITY_DN28574_c0_g1
TRINITY_DN28551_c0_g1
TRINITY_DN89326_c0_g1
TRINITY_DN69667_c0_g1
TRINITY_DN70320_c0_g1
TRINITY_DN17375_c0_g1
TRINITY_DN44903_c0_g1
TRINITY_DN44972_c0_g1
TRINITY_DN44938_c0_g1
TRINITY_DN44909_c0_g1
TRINITY_DN47504_c1_g1
TRINITY_DN47523_c0_g1
TRINITY_DN47523_c1_g1
TRINITY_DN47523_c1_g2
TRINITY_DN47534_c0_g1
TRINITY_DN47510_c0_g2
TRINITY_DN47572_c0_g1
TRINITY_DN47580_c0_g1
TRINITY_DN47577_c0_g1
TRINITY_DN80455_c0_g1
TRINITY_DN10161_c0_g1
TRINITY_DN36694_c0_g1
TRINITY_DN36631_c0_g2
TRINITY_DN36659_c0_g1
TRINITY_DN28267_c0_g1
TRINITY_DN28200_c0_g1
TRINITY_DN31903_c0_g1
TRINITY_DN49643_c0_g2
TRINITY_DN49620_c0_g1
TRINITY_DN49636_c3_g1
TRINITY_DN49654_c0_g1
TRINITY_DN49673_c0_g1
TRINITY_DN30418_c0_g1
TRINITY_DN30413_c0_g1
TRINITY_DN96423_c0_g1
TRINITY_DN91412_c0_g1
TRINITY_DN91463_c0_g1
TRINITY_DN21077_c0_g1
TRINITY_DN28136_c0_g1
TRINITY_DN28181_c0_g1
TRINITY_DN28197_c0_g1
TRINITY_DN74518_c0_g1
TRINITY_DN84755_c0_g1
TRINITY_DN3182_c0_g1
TRINITY_DN48571_c2_g1
TRINITY_DN48550_c1_g2
TRINITY_DN48546_c2_g1
TRINITY_DN48558_c0_g1
TRINITY_DN19762_c0_g1
TRINITY_DN19752_c0_g1
TRINITY_DN14267_c0_g1
TRINITY_DN44359_c0_g1
TRINITY_DN44362_c1_g1
TRINITY_DN44319_c0_g2
TRINITY_DN44370_c0_g1
TRINITY_DN44344_c10_g1
TRINITY_DN44377_c1_g1
TRINITY_DN95697_c0_g1
TRINITY_DN51284_c0_g1
TRINITY_DN51274_c2_g1
TRINITY_DN51231_c0_g1
TRINITY_DN51231_c0_g2
TRINITY_DN38626_c0_g1
TRINITY_DN38646_c0_g1
TRINITY_DN38660_c0_g1
TRINITY_DN44808_c1_g1
TRINITY_DN15407_c0_g1
TRINITY_DN47284_c0_g1
TRINITY_DN47221_c0_g2
TRINITY_DN47277_c0_g2
TRINITY_DN47204_c0_g3
TRINITY_DN63919_c0_g1
TRINITY_DN18904_c0_g1
TRINITY_DN18955_c0_g1
TRINITY_DN18991_c0_g2
TRINITY_DN60875_c0_g1
TRINITY_DN29643_c0_g1
TRINITY_DN29617_c0_g1
TRINITY_DN96341_c0_g1
TRINITY_DN42319_c0_g1
TRINITY_DN42381_c0_g1
TRINITY_DN42304_c0_g1
TRINITY_DN42387_c0_g1
TRINITY_DN42353_c0_g1
TRINITY_DN42352_c0_g1
TRINITY_DN43181_c1_g1
TRINITY_DN43142_c0_g1
TRINITY_DN43153_c1_g1
TRINITY_DN43124_c1_g1
TRINITY_DN43156_c0_g1
TRINITY_DN43109_c0_g3
TRINITY_DN9135_c0_g1
TRINITY_DN9108_c0_g1
TRINITY_DN26202_c0_g1
TRINITY_DN26226_c1_g1
TRINITY_DN41154_c0_g1
TRINITY_DN41140_c1_g1
TRINITY_DN41138_c0_g1
TRINITY_DN94050_c0_g1
TRINITY_DN79317_c0_g1
TRINITY_DN18891_c0_g1
TRINITY_DN18833_c0_g1
TRINITY_DN21977_c0_g1
TRINITY_DN21987_c0_g1
TRINITY_DN21906_c0_g1
TRINITY_DN68604_c0_g1
TRINITY_DN42464_c0_g1
TRINITY_DN42419_c0_g1
TRINITY_DN42427_c0_g1
TRINITY_DN42495_c0_g2
TRINITY_DN42483_c1_g1
TRINITY_DN42465_c0_g1
TRINITY_DN42422_c0_g1
TRINITY_DN92260_c0_g1
TRINITY_DN61202_c0_g1
TRINITY_DN51939_c0_g1
TRINITY_DN51990_c0_g1
TRINITY_DN51982_c2_g1
TRINITY_DN51989_c4_g1
TRINITY_DN51957_c0_g1
TRINITY_DN51934_c3_g1
TRINITY_DN51967_c0_g1
TRINITY_DN51952_c0_g1
TRINITY_DN51913_c1_g4
TRINITY_DN51929_c1_g5
TRINITY_DN6212_c0_g1
TRINITY_DN26414_c0_g1
TRINITY_DN26484_c0_g1
TRINITY_DN96587_c0_g1
TRINITY_DN51590_c0_g1
TRINITY_DN51581_c2_g1
TRINITY_DN51519_c0_g1
TRINITY_DN51567_c0_g1
TRINITY_DN51538_c0_g1
TRINITY_DN51577_c0_g1
TRINITY_DN51544_c0_g1
TRINITY_DN51529_c1_g2
TRINITY_DN51572_c1_g2
TRINITY_DN51572_c1_g5
TRINITY_DN72167_c0_g1
TRINITY_DN72100_c0_g1
TRINITY_DN43648_c0_g1
TRINITY_DN42184_c1_g1
TRINITY_DN42120_c0_g1
TRINITY_DN42162_c0_g2
TRINITY_DN42124_c0_g1
TRINITY_DN42118_c0_g3
TRINITY_DN93940_c0_g1
TRINITY_DN26319_c0_g1
TRINITY_DN26396_c0_g1
TRINITY_DN26335_c0_g1
TRINITY_DN26391_c0_g1
TRINITY_DN8256_c1_g1
TRINITY_DN8249_c0_g1
TRINITY_DN8204_c0_g1
TRINITY_DN22395_c0_g1
TRINITY_DN44727_c0_g2
TRINITY_DN44797_c1_g1
TRINITY_DN44788_c0_g1
TRINITY_DN44729_c0_g1
TRINITY_DN76339_c0_g1
TRINITY_DN6334_c0_g1
TRINITY_DN71694_c0_g1
TRINITY_DN66996_c0_g1
TRINITY_DN39057_c0_g2
TRINITY_DN39047_c0_g1
TRINITY_DN39027_c2_g1
TRINITY_DN14869_c0_g1
TRINITY_DN33384_c0_g1
TRINITY_DN33381_c0_g1
TRINITY_DN33328_c0_g1
TRINITY_DN33327_c0_g1
TRINITY_DN20700_c0_g1
TRINITY_DN45443_c0_g1
TRINITY_DN45411_c0_g1
TRINITY_DN45445_c0_g1
TRINITY_DN45430_c0_g1
TRINITY_DN45410_c0_g1
TRINITY_DN45489_c0_g1
TRINITY_DN78335_c0_g1
TRINITY_DN11987_c0_g1
TRINITY_DN11873_c0_g1
TRINITY_DN11829_c0_g1
TRINITY_DN40171_c0_g1
TRINITY_DN40180_c1_g1
TRINITY_DN32636_c0_g2
TRINITY_DN32625_c1_g1
TRINITY_DN32677_c0_g1
TRINITY_DN32684_c0_g2
TRINITY_DN35525_c0_g1
TRINITY_DN35546_c0_g1
TRINITY_DN27063_c0_g1
TRINITY_DN90286_c0_g1
TRINITY_DN90290_c0_g1
TRINITY_DN30672_c0_g1
TRINITY_DN44265_c1_g1
TRINITY_DN44264_c0_g1
TRINITY_DN44280_c0_g1
TRINITY_DN44282_c0_g1
TRINITY_DN44214_c0_g1
TRINITY_DN45370_c1_g1
TRINITY_DN45357_c0_g1
TRINITY_DN45352_c0_g2
TRINITY_DN45354_c0_g1
TRINITY_DN91648_c0_g1
TRINITY_DN91683_c0_g1
TRINITY_DN34872_c0_g1
TRINITY_DN34893_c0_g1
TRINITY_DN34886_c0_g1
TRINITY_DN97120_c0_g1
TRINITY_DN56868_c0_g1
TRINITY_DN59797_c0_g1
TRINITY_DN39352_c0_g1
TRINITY_DN39360_c0_g1
TRINITY_DN882_c0_g1
TRINITY_DN865_c0_g1
TRINITY_DN889_c0_g1
TRINITY_DN85076_c0_g1
TRINITY_DN20533_c0_g1
TRINITY_DN20514_c0_g1
TRINITY_DN49722_c2_g2
TRINITY_DN49722_c2_g1
TRINITY_DN49719_c1_g1
TRINITY_DN49707_c0_g1
TRINITY_DN49798_c0_g1
TRINITY_DN49701_c4_g4
TRINITY_DN35320_c0_g1
TRINITY_DN35344_c0_g1
TRINITY_DN30542_c0_g1
TRINITY_DN30530_c0_g1
TRINITY_DN30501_c0_g1
TRINITY_DN10819_c0_g1
TRINITY_DN34949_c0_g1
TRINITY_DN34984_c0_g1
TRINITY_DN11111_c0_g1
TRINITY_DN24169_c0_g1
TRINITY_DN19115_c0_g1
TRINITY_DN19172_c0_g1
TRINITY_DN83170_c0_g1
TRINITY_DN41494_c0_g1
TRINITY_DN41490_c1_g1
TRINITY_DN41434_c0_g1
TRINITY_DN41467_c0_g1
TRINITY_DN41462_c0_g1
TRINITY_DN45108_c0_g2
TRINITY_DN45145_c1_g3
TRINITY_DN45158_c7_g1
TRINITY_DN77252_c0_g1
TRINITY_DN77204_c0_g1
TRINITY_DN50230_c0_g1
TRINITY_DN50263_c1_g1
TRINITY_DN50263_c2_g2
TRINITY_DN50253_c0_g1
TRINITY_DN50252_c6_g2
TRINITY_DN50219_c0_g1
TRINITY_DN50280_c1_g5
TRINITY_DN50256_c0_g1
TRINITY_DN50279_c0_g2
TRINITY_DN50235_c0_g1
TRINITY_DN85435_c0_g1
TRINITY_DN28812_c0_g1
TRINITY_DN40572_c0_g1
TRINITY_DN40515_c0_g1
TRINITY_DN40566_c0_g1
TRINITY_DN87580_c0_g1
TRINITY_DN12124_c0_g1
TRINITY_DN18570_c0_g1
TRINITY_DN34470_c0_g1
TRINITY_DN87964_c0_g1
TRINITY_DN45867_c4_g1
TRINITY_DN45894_c0_g1
TRINITY_DN45884_c0_g1
TRINITY_DN45820_c1_g1
TRINITY_DN45800_c0_g2
TRINITY_DN23252_c0_g1
TRINITY_DN29066_c0_g1
TRINITY_DN30144_c0_g1
TRINITY_DN30120_c0_g1
TRINITY_DN30132_c0_g1
TRINITY_DN18214_c0_g1
TRINITY_DN47943_c3_g2
TRINITY_DN47910_c0_g1
TRINITY_DN47924_c0_g1
TRINITY_DN47989_c0_g1
TRINITY_DN47949_c0_g1
TRINITY_DN35177_c0_g1
TRINITY_DN35142_c0_g1
TRINITY_DN35145_c0_g1
TRINITY_DN35147_c0_g1
TRINITY_DN96123_c0_g1
TRINITY_DN17421_c0_g1
TRINITY_DN17400_c0_g1
TRINITY_DN23692_c0_g1
TRINITY_DN23694_c0_g1
TRINITY_DN43502_c0_g1
TRINITY_DN43511_c1_g3
TRINITY_DN13901_c0_g1
TRINITY_DN65878_c0_g1
TRINITY_DN22089_c0_g1
TRINITY_DN22025_c0_g1
TRINITY_DN22016_c0_g1
TRINITY_DN53267_c0_g1
TRINITY_DN53238_c0_g1
TRINITY_DN97838_c0_g1
TRINITY_DN97877_c0_g1
TRINITY_DN97887_c0_g1
TRINITY_DN97832_c0_g1
TRINITY_DN4285_c0_g1
TRINITY_DN4203_c0_g1
TRINITY_DN59317_c0_g1
TRINITY_DN74454_c0_g1
TRINITY_DN74458_c0_g1
TRINITY_DN86427_c0_g1
TRINITY_DN68029_c0_g1
TRINITY_DN46265_c0_g1
TRINITY_DN46217_c0_g1
TRINITY_DN46219_c0_g1
TRINITY_DN46294_c1_g1
TRINITY_DN46290_c0_g1
TRINITY_DN81458_c0_g1
TRINITY_DN81469_c0_g1
TRINITY_DN81442_c0_g1
TRINITY_DN81439_c0_g1
TRINITY_DN23790_c0_g1
TRINITY_DN22569_c0_g1
TRINITY_DN22547_c0_g1
TRINITY_DN33115_c0_g1
TRINITY_DN33165_c0_g1
TRINITY_DN33146_c0_g1
TRINITY_DN33170_c0_g1
TRINITY_DN50300_c1_g1
TRINITY_DN50324_c5_g1
TRINITY_DN50313_c2_g1
TRINITY_DN27180_c0_g1
TRINITY_DN3609_c0_g1
TRINITY_DN3667_c0_g1
TRINITY_DN25799_c0_g1
TRINITY_DN91556_c0_g1
TRINITY_DN19540_c0_g1
TRINITY_DN78245_c0_g1
TRINITY_DN67738_c0_g1
TRINITY_DN52224_c0_g1
TRINITY_DN52246_c1_g1
TRINITY_DN52219_c3_g3
TRINITY_DN52219_c3_g2
TRINITY_DN52253_c2_g1
TRINITY_DN52290_c1_g1
TRINITY_DN52245_c1_g1
TRINITY_DN52245_c1_g2
TRINITY_DN52297_c0_g1
TRINITY_DN52297_c2_g2
TRINITY_DN52261_c0_g1
TRINITY_DN52264_c2_g4
TRINITY_DN39226_c0_g1
TRINITY_DN49956_c0_g1
TRINITY_DN49937_c0_g1
TRINITY_DN49933_c0_g1
TRINITY_DN49925_c0_g1
TRINITY_DN49941_c0_g1
TRINITY_DN49941_c0_g4
TRINITY_DN49941_c0_g2
TRINITY_DN31859_c0_g1
TRINITY_DN31875_c0_g1
TRINITY_DN4736_c0_g1
TRINITY_DN79981_c0_g1
TRINITY_DN51485_c2_g1
TRINITY_DN51419_c1_g2
TRINITY_DN51465_c0_g1
TRINITY_DN51406_c0_g1
TRINITY_DN51457_c0_g1
TRINITY_DN51456_c0_g1
TRINITY_DN51430_c2_g1
TRINITY_DN51450_c5_g2
TRINITY_DN51496_c0_g1
TRINITY_DN51496_c1_g1
TRINITY_DN51437_c0_g1
TRINITY_DN49356_c4_g2
TRINITY_DN49336_c2_g3
TRINITY_DN49315_c0_g1
TRINITY_DN49365_c2_g1
TRINITY_DN49383_c0_g1
TRINITY_DN49304_c2_g1
TRINITY_DN49304_c3_g1
TRINITY_DN49384_c0_g3
TRINITY_DN49384_c0_g2
TRINITY_DN19820_c0_g1
TRINITY_DN19831_c0_g1
TRINITY_DN8556_c0_g1
TRINITY_DN27801_c0_g1
TRINITY_DN95127_c0_g1
TRINITY_DN19456_c0_g1
TRINITY_DN86662_c0_g1
TRINITY_DN45576_c0_g1
TRINITY_DN45582_c0_g1
TRINITY_DN45582_c2_g1
TRINITY_DN45552_c0_g1
TRINITY_DN45551_c0_g2
TRINITY_DN45597_c0_g1
TRINITY_DN45500_c0_g2
TRINITY_DN36115_c0_g1
TRINITY_DN36184_c0_g1
TRINITY_DN36181_c0_g1
TRINITY_DN36108_c1_g1
TRINITY_DN98126_c0_g1
TRINITY_DN98194_c0_g1
TRINITY_DN52825_c0_g1
TRINITY_DN71141_c0_g1
TRINITY_DN40703_c0_g1
TRINITY_DN40745_c0_g3
TRINITY_DN40704_c0_g1
TRINITY_DN40722_c0_g3
TRINITY_DN23418_c0_g1
TRINITY_DN51039_c1_g2
TRINITY_DN51034_c0_g1
TRINITY_DN51066_c1_g1
TRINITY_DN51006_c0_g1
TRINITY_DN94204_c0_g1
TRINITY_DN94208_c0_g1
TRINITY_DN49598_c0_g1
TRINITY_DN49598_c2_g1
TRINITY_DN49583_c0_g1
TRINITY_DN49506_c0_g1
TRINITY_DN76413_c0_g1
TRINITY_DN16609_c0_g1
TRINITY_DN94340_c0_g1
TRINITY_DN80796_c0_g1
TRINITY_DN83521_c0_g1
TRINITY_DN83548_c0_g1
TRINITY_DN52184_c0_g1
TRINITY_DN52171_c3_g1
TRINITY_DN52163_c3_g1
TRINITY_DN52103_c1_g1
TRINITY_DN52194_c1_g1
TRINITY_DN52182_c2_g3
TRINITY_DN52156_c1_g1
TRINITY_DN52156_c1_g2
TRINITY_DN52156_c2_g1
TRINITY_DN91269_c0_g1
TRINITY_DN75527_c0_g1
TRINITY_DN22926_c0_g1
TRINITY_DN22918_c1_g1
TRINITY_DN22922_c0_g1
TRINITY_DN48841_c0_g1
TRINITY_DN48856_c0_g1
TRINITY_DN48861_c3_g1
TRINITY_DN48861_c3_g3
TRINITY_DN48828_c0_g1
TRINITY_DN48878_c0_g1
TRINITY_DN81343_c0_g1
TRINITY_DN58072_c0_g1
TRINITY_DN58017_c0_g1
TRINITY_DN58029_c0_g1
TRINITY_DN51332_c2_g1
TRINITY_DN51308_c1_g1
TRINITY_DN51376_c0_g1
TRINITY_DN51365_c0_g2
TRINITY_DN51330_c1_g2
TRINITY_DN51345_c0_g2
TRINITY_DN51329_c0_g1
TRINITY_DN51312_c0_g2
TRINITY_DN44410_c0_g2
TRINITY_DN44497_c1_g2
TRINITY_DN44415_c0_g1
TRINITY_DN44400_c0_g1
TRINITY_DN44445_c0_g1
TRINITY_DN6784_c0_g1
TRINITY_DN63814_c0_g1
TRINITY_DN50078_c0_g2
TRINITY_DN50037_c2_g1
TRINITY_DN50068_c3_g2
TRINITY_DN50056_c3_g2
TRINITY_DN25082_c0_g1
TRINITY_DN21427_c0_g1
TRINITY_DN9694_c0_g1
TRINITY_DN68886_c0_g1
TRINITY_DN50111_c0_g1
TRINITY_DN50156_c0_g2
TRINITY_DN50105_c1_g1
TRINITY_DN48695_c2_g1
TRINITY_DN48695_c2_g2
TRINITY_DN48673_c0_g1
TRINITY_DN48614_c2_g1
TRINITY_DN73176_c0_g1
TRINITY_DN82540_c0_g1
TRINITY_DN37551_c0_g1
TRINITY_DN9267_c0_g1
TRINITY_DN46753_c2_g1
TRINITY_DN73491_c0_g1
TRINITY_DN73467_c0_g1
TRINITY_DN12868_c0_g1
TRINITY_DN88623_c0_g1
TRINITY_DN88601_c0_g1
TRINITY_DN31599_c0_g1
TRINITY_DN31526_c0_g1
TRINITY_DN31563_c0_g1
TRINITY_DN31532_c0_g1
TRINITY_DN42005_c0_g1
TRINITY_DN42025_c0_g1
TRINITY_DN42893_c0_g1
TRINITY_DN42875_c0_g1
TRINITY_DN74745_c0_g1
TRINITY_DN1066_c0_g1
TRINITY_DN85527_c0_g1
TRINITY_DN85521_c0_g1
TRINITY_DN49026_c3_g1
TRINITY_DN49058_c0_g1
TRINITY_DN49011_c1_g1
TRINITY_DN49055_c0_g1
TRINITY_DN49018_c0_g1
TRINITY_DN49089_c1_g1
TRINITY_DN49061_c3_g1
TRINITY_DN49069_c1_g2
TRINITY_DN49023_c2_g1
TRINITY_DN3880_c0_g1
TRINITY_DN89948_c0_g1
TRINITY_DN57162_c0_g1
TRINITY_DN67959_c0_g1
TRINITY_DN26593_c0_g1
TRINITY_DN32482_c0_g1
TRINITY_DN32485_c0_g1
TRINITY_DN92832_c0_g1
TRINITY_DN37655_c0_g1
TRINITY_DN37664_c0_g1
TRINITY_DN41756_c0_g1
TRINITY_DN41772_c0_g1
TRINITY_DN41700_c0_g1
TRINITY_DN77168_c0_g1
TRINITY_DN7712_c0_g1
TRINITY_DN7797_c0_g1
TRINITY_DN83318_c0_g1
TRINITY_DN36946_c0_g1
TRINITY_DN29351_c0_g1
TRINITY_DN29383_c0_g1
TRINITY_DN71706_c0_g1
TRINITY_DN46659_c2_g1
TRINITY_DN46609_c0_g1
TRINITY_DN46609_c0_g2
TRINITY_DN90067_c0_g1
TRINITY_DN2195_c0_g1
TRINITY_DN36416_c0_g1
TRINITY_DN36447_c0_g1
TRINITY_DN36458_c0_g1
TRINITY_DN45735_c0_g1
TRINITY_DN45712_c0_g1
TRINITY_DN45741_c0_g1
TRINITY_DN45723_c0_g1
TRINITY_DN45788_c0_g1
TRINITY_DN80251_c0_g1
TRINITY_DN80282_c0_g1
TRINITY_DN81656_c0_g1
TRINITY_DN75353_c0_g1
TRINITY_DN33414_c0_g1
TRINITY_DN15543_c0_g1
TRINITY_DN24096_c0_g1
TRINITY_DN24089_c0_g1
TRINITY_DN67818_c0_g1
TRINITY_DN67833_c0_g1
TRINITY_DN67872_c0_g1
TRINITY_DN41660_c0_g1
TRINITY_DN49489_c0_g1
TRINITY_DN49430_c1_g1
TRINITY_DN49430_c3_g1
TRINITY_DN49418_c0_g2
TRINITY_DN49426_c0_g2
TRINITY_DN49466_c0_g1
TRINITY_DN49400_c0_g1
TRINITY_DN31672_c0_g1
TRINITY_DN41245_c0_g1
TRINITY_DN41221_c0_g1
TRINITY_DN41282_c0_g1
TRINITY_DN41282_c2_g1
TRINITY_DN37459_c0_g1
TRINITY_DN37410_c0_g1
TRINITY_DN399_c0_g1
TRINITY_DN17896_c0_g1
TRINITY_DN70625_c0_g1
TRINITY_DN97569_c0_g1
TRINITY_DN97534_c0_g1
TRINITY_DN97571_c0_g1
TRINITY_DN6690_c0_g1
TRINITY_DN6608_c0_g1
TRINITY_DN101254_c0_g1
TRINITY_DN101298_c0_g1
TRINITY_DN101605_c0_g1
TRINITY_DN101140_c0_g1
TRINITY_DN102641_c0_g1
TRINITY_DN101766_c0_g1
TRINITY_DN100309_c0_g1
TRINITY_DN100716_c0_g1
TRINITY_DN101560_c0_g1
TRINITY_DN101371_c0_g1
TRINITY_DN101471_c0_g1
TRINITY_DN101470_c0_g1
TRINITY_DN100697_c0_g1
TRINITY_DN100849_c0_g1
TRINITY_DN46383_c0_g1
TRINITY_DN46301_c1_g1
TRINITY_DN46325_c0_g1
TRINITY_DN46360_c0_g1
TRINITY_DN46350_c0_g1
TRINITY_DN46361_c2_g3
TRINITY_DN28602_c0_g1
TRINITY_DN38071_c0_g1
TRINITY_DN38010_c0_g1
TRINITY_DN38026_c0_g1
TRINITY_DN84879_c0_g1
TRINITY_DN34216_c0_g1
TRINITY_DN59002_c0_g1
TRINITY_DN59043_c0_g1
TRINITY_DN36574_c0_g1
TRINITY_DN36566_c1_g1
TRINITY_DN86066_c0_g1
TRINITY_DN86035_c0_g1
TRINITY_DN36845_c0_g1
TRINITY_DN36852_c0_g1
TRINITY_DN32531_c0_g1
TRINITY_DN44526_c0_g1
TRINITY_DN44509_c0_g3
TRINITY_DN44592_c2_g1
TRINITY_DN44595_c2_g1
TRINITY_DN44545_c0_g1
TRINITY_DN24390_c0_g1
TRINITY_DN47001_c0_g1
TRINITY_DN47053_c0_g1
TRINITY_DN47068_c0_g1
TRINITY_DN39742_c0_g1
TRINITY_DN39782_c0_g1
TRINITY_DN39724_c0_g1
TRINITY_DN39731_c0_g1
TRINITY_DN39700_c0_g1
TRINITY_DN39763_c0_g1
TRINITY_DN39746_c0_g1
TRINITY_DN39796_c0_g1
TRINITY_DN94612_c0_g1
TRINITY_DN94605_c0_g1
TRINITY_DN10434_c0_g1
TRINITY_DN29141_c0_g1
TRINITY_DN21284_c0_g1
TRINITY_DN57583_c0_g1
TRINITY_DN7269_c0_g1
TRINITY_DN43213_c0_g1
TRINITY_DN43250_c0_g1
TRINITY_DN43202_c0_g1
TRINITY_DN43220_c0_g1
TRINITY_DN99160_c0_g1
TRINITY_DN99156_c0_g1
TRINITY_DN76064_c0_g1
TRINITY_DN17032_c0_g1
TRINITY_DN46062_c0_g1
TRINITY_DN46032_c1_g1
TRINITY_DN46018_c0_g1
TRINITY_DN46019_c0_g1
TRINITY_DN46004_c0_g1
TRINITY_DN46088_c1_g1
TRINITY_DN8808_c0_g1
TRINITY_DN7971_c0_g1
TRINITY_DN29717_c0_g1
TRINITY_DN29299_c0_g1
TRINITY_DN29281_c0_g1
TRINITY_DN2654_c0_g1
TRINITY_DN2619_c0_g2
TRINITY_DN16276_c0_g1
TRINITY_DN40875_c0_g1
TRINITY_DN40858_c0_g1
TRINITY_DN40862_c0_g1
TRINITY_DN69354_c0_g1
TRINITY_DN60669_c0_g1
TRINITY_DN27230_c0_g1
TRINITY_DN38288_c0_g1
TRINITY_DN38250_c0_g1
TRINITY_DN38212_c0_g1
TRINITY_DN38267_c0_g1
TRINITY_DN38200_c0_g1
TRINITY_DN38255_c0_g1
TRINITY_DN38272_c1_g2
TRINITY_DN34391_c0_g1
TRINITY_DN1561_c0_g1
TRINITY_DN1544_c0_g1
TRINITY_DN1569_c0_g1
TRINITY_DN89756_c0_g1
TRINITY_DN38338_c0_g1
TRINITY_DN38348_c1_g1
TRINITY_DN27744_c0_g1
TRINITY_DN79771_c0_g1
TRINITY_DN99408_c0_g1
TRINITY_DN34556_c0_g1
TRINITY_DN34543_c0_g1
TRINITY_DN94482_c0_g1
TRINITY_DN58749_c0_g1
TRINITY_DN40451_c0_g1
TRINITY_DN40447_c0_g1
TRINITY_DN40490_c0_g2
TRINITY_DN40422_c0_g1
TRINITY_DN40422_c0_g2
TRINITY_DN54872_c0_g1
TRINITY_DN54821_c0_g1
TRINITY_DN54894_c0_g1
TRINITY_DN58232_c0_g1
TRINITY_DN58289_c0_g1
TRINITY_DN58240_c0_g1
TRINITY_DN58282_c0_g1
TRINITY_DN48246_c0_g3
TRINITY_DN48291_c0_g3
TRINITY_DN48239_c0_g1
TRINITY_DN48239_c0_g3
TRINITY_DN40318_c0_g1
TRINITY_DN40346_c0_g1
TRINITY_DN40327_c0_g1
TRINITY_DN40325_c0_g1
TRINITY_DN40384_c0_g1
TRINITY_DN40347_c0_g1
TRINITY_DN53543_c0_g1
TRINITY_DN50622_c2_g3
TRINITY_DN50604_c0_g4
TRINITY_DN50677_c0_g1
TRINITY_DN43034_c0_g2
TRINITY_DN5977_c0_g1
TRINITY_DN6911_c0_g1
TRINITY_DN75886_c0_g1
TRINITY_DN75806_c0_g1
TRINITY_DN75832_c0_g1
TRINITY_DN46494_c0_g2
TRINITY_DN46494_c0_g1
TRINITY_DN46437_c0_g1
TRINITY_DN46402_c0_g1
TRINITY_DN45638_c0_g1
TRINITY_DN45650_c1_g1
TRINITY_DN45681_c1_g1
TRINITY_DN45626_c0_g1
TRINITY_DN45612_c1_g2
TRINITY_DN8694_c0_g1
TRINITY_DN38897_c0_g1
TRINITY_DN38804_c0_g1
TRINITY_DN38825_c0_g1
TRINITY_DN14533_c0_g1
TRINITY_DN48093_c0_g1
TRINITY_DN48044_c0_g4
TRINITY_DN48070_c0_g1
TRINITY_DN48028_c0_g1
TRINITY_DN46994_c0_g1
TRINITY_DN46953_c0_g1
TRINITY_DN46953_c1_g2
TRINITY_DN46909_c0_g1
TRINITY_DN46958_c0_g1
TRINITY_DN46917_c0_g1
TRINITY_DN78428_c0_g1
TRINITY_DN78441_c0_g1
TRINITY_DN72806_c0_g1
TRINITY_DN47454_c0_g1
TRINITY_DN47417_c0_g1
TRINITY_DN47477_c0_g1
TRINITY_DN47489_c0_g1
TRINITY_DN47452_c0_g1
TRINITY_DN47461_c9_g3
TRINITY_DN47435_c0_g1
TRINITY_DN47484_c0_g1
TRINITY_DN33585_c0_g1
TRINITY_DN54391_c0_g1
TRINITY_DN50866_c7_g2
TRINITY_DN50803_c0_g1
TRINITY_DN50803_c1_g1
TRINITY_DN50803_c2_g1
TRINITY_DN50803_c2_g4
TRINITY_DN50813_c0_g1
TRINITY_DN50885_c1_g2
TRINITY_DN50808_c3_g1
TRINITY_DN50825_c0_g1
TRINITY_DN50873_c0_g2
TRINITY_DN99796_c0_g1
TRINITY_DN32891_c0_g2
TRINITY_DN32849_c0_g1
TRINITY_DN76120_c0_g1
TRINITY_DN76624_c0_g1
TRINITY_DN54532_c0_g1
TRINITY_DN54591_c0_g1
TRINITY_DN41848_c0_g2
TRINITY_DN41821_c0_g1
TRINITY_DN41821_c0_g2
TRINITY_DN41858_c0_g1
TRINITY_DN5708_c0_g1
TRINITY_DN42761_c0_g1
TRINITY_DN42754_c0_g1
TRINITY_DN42717_c0_g1
TRINITY_DN26946_c0_g1
TRINITY_DN51114_c3_g2
TRINITY_DN51121_c1_g3
TRINITY_DN51155_c1_g1
TRINITY_DN51165_c1_g3
TRINITY_DN51110_c0_g1
TRINITY_DN51196_c3_g3
TRINITY_DN51117_c0_g2
TRINITY_DN40643_c0_g1
TRINITY_DN40695_c0_g1
TRINITY_DN40688_c0_g1
TRINITY_DN40636_c0_g1
TRINITY_DN2305_c0_g1
TRINITY_DN81198_c0_g1
TRINITY_DN25935_c0_g1
TRINITY_DN1701_c0_g1
TRINITY_DN59823_c0_g1
TRINITY_DN41988_c0_g1
TRINITY_DN41939_c0_g1
TRINITY_DN41991_c0_g1
TRINITY_DN41991_c1_g1
TRINITY_DN41906_c0_g1
TRINITY_DN41928_c0_g1
TRINITY_DN38142_c0_g1
TRINITY_DN38102_c0_g1
TRINITY_DN38104_c0_g1
TRINITY_DN5413_c0_g1
TRINITY_DN23893_c0_g1
TRINITY_DN23819_c0_g1
TRINITY_DN23802_c0_g1
TRINITY_DN43740_c1_g2
TRINITY_DN43781_c1_g1
TRINITY_DN43784_c0_g2
TRINITY_DN43747_c0_g1
TRINITY_DN43772_c0_g1
TRINITY_DN43790_c0_g1
TRINITY_DN43797_c0_g1
TRINITY_DN94704_c0_g1
TRINITY_DN68377_c0_g1
TRINITY_DN39163_c0_g1
TRINITY_DN39165_c0_g1
TRINITY_DN38949_c0_g2
TRINITY_DN38949_c0_g1
TRINITY_DN38973_c0_g1
TRINITY_DN44195_c1_g1
TRINITY_DN44149_c0_g1
TRINITY_DN44143_c0_g1
TRINITY_DN44176_c0_g1
TRINITY_DN44160_c0_g1
TRINITY_DN9419_c0_g1
TRINITY_DN9496_c0_g1
TRINITY_DN9439_c1_g1
TRINITY_DN27397_c0_g1
TRINITY_DN27375_c0_g1
TRINITY_DN67611_c0_g1
TRINITY_DN13203_c0_g1
TRINITY_DN13225_c0_g1
TRINITY_DN16802_c0_g1
TRINITY_DN42589_c0_g1
TRINITY_DN42590_c0_g1
TRINITY_DN42505_c0_g1
TRINITY_DN42539_c0_g1
TRINITY_DN42592_c0_g1
TRINITY_DN39889_c0_g1
TRINITY_DN39806_c0_g1
TRINITY_DN51863_c1_g1
TRINITY_DN51809_c2_g1
TRINITY_DN51867_c0_g1
TRINITY_DN51818_c0_g1
TRINITY_DN51860_c0_g1
TRINITY_DN51829_c1_g1
TRINITY_DN51893_c0_g1
TRINITY_DN97355_c0_g1
TRINITY_DN97395_c0_g1
TRINITY_DN97317_c0_g1
TRINITY_DN5896_c0_g1
TRINITY_DN22484_c0_g1
TRINITY_DN3773_c0_g1
TRINITY_DN24233_c0_g1
TRINITY_DN24247_c0_g1
TRINITY_DN9557_c0_g1
TRINITY_DN9563_c0_g1
TRINITY_DN9554_c0_g1
TRINITY_DN71837_c0_g1
TRINITY_DN34698_c0_g1
TRINITY_DN34642_c0_g1
TRINITY_DN12908_c0_g1
TRINITY_DN41585_c0_g2
TRINITY_DN41597_c0_g1
TRINITY_DN41549_c0_g1
TRINITY_DN41562_c0_g2
TRINITY_DN41577_c0_g1
TRINITY_DN41536_c0_g1
TRINITY_DN41542_c1_g2
TRINITY_DN18792_c0_g1
TRINITY_DN18703_c0_g1
TRINITY_DN89412_c0_g1
TRINITY_DN90731_c0_g1
TRINITY_DN32061_c0_g1
TRINITY_DN32010_c0_g1
TRINITY_DN64552_c0_g1
TRINITY_DN40280_c0_g1
TRINITY_DN40234_c0_g1
TRINITY_DN40276_c0_g1
TRINITY_DN40227_c0_g1
TRINITY_DN40285_c0_g1
TRINITY_DN40250_c1_g1
TRINITY_DN47197_c1_g1
TRINITY_DN47102_c0_g1
TRINITY_DN47119_c0_g1
TRINITY_DN47127_c1_g1
TRINITY_DN47169_c0_g1
TRINITY_DN10281_c0_g1
TRINITY_DN76746_c0_g1
TRINITY_DN76733_c0_g1
TRINITY_DN76723_c0_g1
TRINITY_DN26807_c0_g1
TRINITY_DN38793_c0_g1
TRINITY_DN38796_c0_g1
TRINITY_DN38782_c0_g1
TRINITY_DN38722_c1_g1
TRINITY_DN75924_c0_g1
TRINITY_DN49232_c0_g1
TRINITY_DN49200_c0_g1
TRINITY_DN49283_c0_g1
TRINITY_DN49271_c1_g2
TRINITY_DN49245_c0_g1
TRINITY_DN46125_c0_g1
TRINITY_DN46150_c1_g2
TRINITY_DN46139_c0_g2
TRINITY_DN46118_c1_g1
TRINITY_DN46118_c2_g2
TRINITY_DN46118_c2_g1
TRINITY_DN46114_c0_g1
TRINITY_DN96046_c0_g1
TRINITY_DN96035_c0_g1
TRINITY_DN4151_c0_g1
TRINITY_DN4110_c0_g1
TRINITY_DN86816_c0_g1
TRINITY_DN70223_c0_g1
TRINITY_DN92946_c0_g1
TRINITY_DN76561_c0_g1
TRINITY_DN15076_c0_g1
TRINITY_DN87856_c0_g1
TRINITY_DN87861_c0_g1
TRINITY_DN74035_c0_g1
TRINITY_DN16499_c0_g1
TRINITY_DN73547_c0_g1
TRINITY_DN59574_c0_g1
TRINITY_DN59527_c0_g1
TRINITY_DN42221_c0_g1
TRINITY_DN42205_c0_g1
TRINITY_DN42280_c0_g1
TRINITY_DN42243_c0_g1
TRINITY_DN42253_c1_g1
TRINITY_DN42270_c0_g1
TRINITY_DN83443_c0_g1
TRINITY_DN91757_c0_g1
TRINITY_DN91771_c0_g1
TRINITY_DN35497_c0_g1
TRINITY_DN35452_c0_g1
TRINITY_DN35472_c0_g1
TRINITY_DN45921_c0_g1
TRINITY_DN45946_c0_g1
TRINITY_DN45902_c0_g1
TRINITY_DN45907_c1_g1
TRINITY_DN45989_c1_g1
TRINITY_DN58370_c0_g1
TRINITY_DN9977_c0_g1
TRINITY_DN80876_c0_g1
TRINITY_DN68275_c0_g1
TRINITY_DN37768_c1_g1
TRINITY_DN37743_c0_g1
TRINITY_DN26683_c0_g1
TRINITY_DN31413_c0_g1
TRINITY_DN35244_c0_g1
TRINITY_DN18680_c0_g1
TRINITY_DN18624_c0_g1
TRINITY_DN24698_c0_g1
TRINITY_DN4012_c0_g1
TRINITY_DN34750_c0_g1
TRINITY_DN59117_c0_g1
TRINITY_DN59123_c0_g1
TRINITY_DN38473_c0_g1
TRINITY_DN38455_c0_g1
TRINITY_DN38439_c0_g1
TRINITY_DN57905_c0_g1
TRINITY_DN77541_c0_g1
TRINITY_DN31751_c0_g1
TRINITY_DN81951_c0_g1
TRINITY_DN39630_c0_g1
TRINITY_DN29549_c0_g1
TRINITY_DN29587_c0_g1
TRINITY_DN29578_c0_g1
TRINITY_DN29574_c0_g1
TRINITY_DN36771_c0_g1
TRINITY_DN36771_c1_g1
TRINITY_DN36785_c0_g1
TRINITY_DN36740_c0_g1
TRINITY_DN36719_c0_g1
TRINITY_DN82397_c0_g1
TRINITY_DN82315_c0_g1
TRINITY_DN82331_c0_g1
TRINITY_DN82382_c0_g1
TRINITY_DN81041_c0_g1
TRINITY_DN95494_c0_g1
TRINITY_DN74284_c0_g1
TRINITY_DN72220_c0_g1
TRINITY_DN97967_c0_g1
TRINITY_DN44688_c1_g1
TRINITY_DN44677_c0_g1
TRINITY_DN44647_c2_g1
TRINITY_DN44678_c1_g1
TRINITY_DN22889_c0_g1
TRINITY_DN94564_c0_g1
TRINITY_DN37232_c0_g1
TRINITY_DN44087_c0_g1
TRINITY_DN44074_c0_g1
TRINITY_DN44013_c0_g1
TRINITY_DN44004_c0_g1
TRINITY_DN44015_c0_g1
TRINITY_DN44099_c0_g1
TRINITY_DN44005_c0_g1
TRINITY_DN22113_c0_g1
TRINITY_DN47858_c0_g1
TRINITY_DN47893_c0_g1
TRINITY_DN47881_c1_g1
TRINITY_DN47865_c0_g1
TRINITY_DN47897_c0_g1
TRINITY_DN47897_c1_g1
TRINITY_DN47877_c2_g1
TRINITY_DN46854_c1_g1
TRINITY_DN46849_c2_g1
TRINITY_DN46835_c0_g1
TRINITY_DN46864_c2_g3
TRINITY_DN46899_c0_g1
TRINITY_DN46886_c0_g3
TRINITY_DN46832_c0_g1
TRINITY_DN58444_c0_g1
TRINITY_DN36379_c1_g1
TRINITY_DN95893_c0_g1
TRINITY_DN95868_c0_g1
TRINITY_DN52436_c12_g2
TRINITY_DN52408_c0_g1
TRINITY_DN52483_c3_g1
TRINITY_DN52418_c1_g1
TRINITY_DN52484_c4_g1
TRINITY_DN52469_c1_g1
TRINITY_DN52431_c2_g2
TRINITY_DN52431_c2_g6
TRINITY_DN52431_c2_g8
TRINITY_DN52448_c8_g2
TRINITY_DN52470_c0_g1
TRINITY_DN52486_c1_g1
TRINITY_DN52494_c7_g1
TRINITY_DN52494_c8_g1
TRINITY_DN79013_c0_g1
TRINITY_DN79037_c0_g1
TRINITY_DN79062_c0_g1
TRINITY_DN79015_c0_g1
TRINITY_DN32787_c0_g1
TRINITY_DN11525_c0_g1
TRINITY_DN11520_c0_g1
TRINITY_DN24827_c0_g1
TRINITY_DN24869_c0_g1
TRINITY_DN24835_c0_g1
TRINITY_DN38549_c0_g1
TRINITY_DN38571_c0_g1
TRINITY_DN38598_c0_g1
TRINITY_DN38584_c0_g1
TRINITY_DN38519_c0_g1
TRINITY_DN12326_c0_g1
TRINITY_DN35878_c0_g1
TRINITY_DN35835_c0_g1
TRINITY_DN35824_c0_g1
TRINITY_DN63637_c0_g1
TRINITY_DN63620_c0_g1
TRINITY_DN55293_c0_g1
TRINITY_DN85112_c0_g1
TRINITY_DN14319_c0_g1
TRINITY_DN77990_c0_g1
TRINITY_DN14996_c0_g1
TRINITY_DN99892_c0_g1
TRINITY_DN55936_c0_g1
TRINITY_DN31016_c0_g1
TRINITY_DN31041_c0_g1
TRINITY_DN31096_c0_g1
TRINITY_DN72930_c0_g1
TRINITY_DN47699_c0_g2
TRINITY_DN47627_c2_g1
TRINITY_DN47621_c0_g1
TRINITY_DN47650_c1_g1
TRINITY_DN47628_c6_g1
TRINITY_DN47651_c0_g1
TRINITY_DN76271_c0_g1
TRINITY_DN76257_c0_g1
TRINITY_DN8774_c0_g1
TRINITY_DN36047_c0_g1
TRINITY_DN36077_c0_g1
TRINITY_DN36059_c0_g1
TRINITY_DN68547_c0_g1
TRINITY_DN45216_c0_g1
TRINITY_DN45232_c0_g1
TRINITY_DN45276_c0_g1
TRINITY_DN31284_c0_g1
TRINITY_DN31285_c0_g1
TRINITY_DN50424_c1_g1
TRINITY_DN50424_c1_g4
TRINITY_DN50461_c0_g1
TRINITY_DN50439_c1_g2
TRINITY_DN50402_c1_g3
TRINITY_DN43943_c1_g1
TRINITY_DN43999_c0_g1
TRINITY_DN84464_c0_g1
TRINITY_DN12501_c0_g1
TRINITY_DN61014_c0_g1
TRINITY_DN32232_c0_g1
TRINITY_DN32289_c0_g1
TRINITY_DN5504_c0_g1
TRINITY_DN52052_c1_g1
TRINITY_DN52051_c1_g1
TRINITY_DN52058_c1_g4
TRINITY_DN52031_c2_g1
TRINITY_DN52022_c0_g1
TRINITY_DN52093_c1_g1
TRINITY_DN52007_c1_g2
TRINITY_DN48709_c3_g1
TRINITY_DN48786_c0_g1
TRINITY_DN48740_c0_g4
TRINITY_DN48740_c0_g5
TRINITY_DN48700_c0_g1
TRINITY_DN48768_c0_g1
TRINITY_DN48773_c0_g1
TRINITY_DN48773_c0_g2
TRINITY_DN48714_c0_g3
TRINITY_DN48718_c0_g1
TRINITY_DN48780_c1_g1
TRINITY_DN17298_c0_g1
TRINITY_DN85894_c0_g1
TRINITY_DN33772_c0_g1
TRINITY_DN33715_c0_g1
TRINITY_DN33794_c0_g1
TRINITY_DN60791_c0_g1
TRINITY_DN10520_c0_g1
TRINITY_DN31305_c0_g1
TRINITY_DN31346_c0_g1
TRINITY_DN81730_c0_g1
TRINITY_DN50750_c3_g1
TRINITY_DN50750_c3_g2
TRINITY_DN50706_c1_g3
TRINITY_DN50735_c0_g1
TRINITY_DN50788_c0_g1
TRINITY_DN62034_c0_g1
TRINITY_DN62094_c0_g1
TRINITY_DN33974_c0_g1
TRINITY_DN33952_c0_g1
TRINITY_DN33932_c0_g1
TRINITY_DN33933_c0_g1
TRINITY_DN70417_c0_g1
TRINITY_DN95319_c0_g1
TRINITY_DN33831_c0_g1
TRINITY_DN33850_c0_g1
TRINITY_DN33801_c0_g1
TRINITY_DN2498_c0_g1
TRINITY_DN52523_c1_g1
TRINITY_DN52534_c6_g2
TRINITY_DN52574_c8_g2
TRINITY_DN52557_c6_g2
TRINITY_DN52570_c12_g1
TRINITY_DN52519_c5_g1
TRINITY_DN52553_c1_g1
TRINITY_DN52535_c2_g1
TRINITY_DN52556_c4_g1
TRINITY_DN52556_c5_g1
TRINITY_DN52505_c1_g1
TRINITY_DN52559_c5_g1
TRINITY_DN20656_c0_g1
TRINITY_DN45022_c0_g1
TRINITY_DN45046_c0_g1
TRINITY_DN45053_c0_g1
TRINITY_DN45080_c0_g1
TRINITY_DN45080_c0_g2
TRINITY_DN45067_c0_g1
TRINITY_DN45055_c0_g1

## Sheet: Common in NR Swiss-Prot
Common elements in NR Swiss-Prot :
TRINITY_DN35680_c0_g1
TRINITY_DN35609_c0_g1
TRINITY_DN35624_c0_g1
TRINITY_DN35679_c0_g1
TRINITY_DN74945_c0_g1
TRINITY_DN41028_c0_g2
TRINITY_DN41097_c0_g1
TRINITY_DN41094_c0_g1
TRINITY_DN41037_c0_g1
TRINITY_DN39546_c0_g1
TRINITY_DN37131_c0_g3
TRINITY_DN37105_c0_g1
TRINITY_DN53693_c0_g1
TRINITY_DN16769_c0_g1
TRINITY_DN76889_c1_g1
TRINITY_DN27557_c0_g1
TRINITY_DN27588_c0_g1
TRINITY_DN61872_c0_g1
TRINITY_DN61842_c0_g1
TRINITY_DN71403_c0_g1
TRINITY_DN33086_c0_g1
TRINITY_DN33021_c1_g1
TRINITY_DN33052_c0_g1
TRINITY_DN1625_c0_g1
TRINITY_DN27681_c0_g1
TRINITY_DN27697_c0_g1
TRINITY_DN65941_c0_g1
TRINITY_DN39927_c0_g1
TRINITY_DN39941_c0_g1
TRINITY_DN49173_c0_g1
TRINITY_DN49184_c0_g2
TRINITY_DN27916_c0_g1
TRINITY_DN27900_c0_g1
TRINITY_DN62743_c0_g1
TRINITY_DN78513_c0_g1
TRINITY_DN78565_c0_g1
TRINITY_DN51672_c1_g1
TRINITY_DN51688_c1_g2
TRINITY_DN51659_c4_g1
TRINITY_DN37822_c0_g2
TRINITY_DN37866_c0_g1
TRINITY_DN55658_c0_g1
TRINITY_DN55682_c0_g1
TRINITY_DN55669_c0_g1
TRINITY_DN32142_c0_g1
TRINITY_DN32143_c0_g1
TRINITY_DN51769_c1_g1
TRINITY_DN51758_c1_g1
TRINITY_DN51727_c0_g1
TRINITY_DN66374_c0_g1
TRINITY_DN66373_c0_g1
TRINITY_DN54967_c0_g1
TRINITY_DN31107_c1_g1
TRINITY_DN31143_c0_g1
TRINITY_DN52326_c1_g1
TRINITY_DN10965_c0_g1
TRINITY_DN46509_c1_g1
TRINITY_DN46594_c1_g3
TRINITY_DN46500_c1_g3
TRINITY_DN46500_c1_g2
TRINITY_DN46547_c2_g1
TRINITY_DN46575_c0_g1
TRINITY_DN46548_c1_g1
TRINITY_DN82710_c0_g1
TRINITY_DN39456_c0_g1
TRINITY_DN52690_c0_g1
TRINITY_DN50569_c1_g3
TRINITY_DN50565_c0_g1
TRINITY_DN50523_c3_g4
TRINITY_DN93406_c0_g1
TRINITY_DN93494_c0_g1
TRINITY_DN93440_c0_g1
TRINITY_DN26727_c0_g1
TRINITY_DN43864_c0_g1
TRINITY_DN43848_c1_g1
TRINITY_DN47374_c0_g2
TRINITY_DN47392_c2_g1
TRINITY_DN47378_c0_g1
TRINITY_DN77329_c0_g1
TRINITY_DN48375_c0_g1
TRINITY_DN48346_c0_g1
TRINITY_DN48396_c0_g1
TRINITY_DN48307_c1_g1
TRINITY_DN40007_c0_g1
TRINITY_DN48414_c0_g1
TRINITY_DN48480_c1_g1
TRINITY_DN48412_c0_g2
TRINITY_DN37346_c0_g1
TRINITY_DN37380_c0_g1
TRINITY_DN37352_c0_g1
TRINITY_DN67530_c0_g1
TRINITY_DN37994_c0_g1
TRINITY_DN87118_c0_g1
TRINITY_DN52948_c0_g1
TRINITY_DN49855_c3_g1
TRINITY_DN49859_c1_g2
TRINITY_DN87315_c0_g1
TRINITY_DN56337_c0_g1
TRINITY_DN47708_c0_g1
TRINITY_DN47756_c0_g1
TRINITY_DN47711_c1_g1
TRINITY_DN28907_c0_g1
TRINITY_DN43363_c0_g1
TRINITY_DN43371_c0_g1
TRINITY_DN21191_c0_g1
TRINITY_DN42955_c0_g1
TRINITY_DN13563_c0_g1
TRINITY_DN69757_c0_g1
TRINITY_DN60577_c0_g1
TRINITY_DN61594_c0_g1
TRINITY_DN24788_c0_g1
TRINITY_DN24737_c0_g1
TRINITY_DN22294_c0_g1
TRINITY_DN50920_c1_g3
TRINITY_DN50990_c1_g2
TRINITY_DN41377_c0_g2
TRINITY_DN30049_c0_g1
TRINITY_DN63078_c0_g1
TRINITY_DN63079_c0_g1
TRINITY_DN48181_c0_g1
TRINITY_DN12441_c0_g1
TRINITY_DN53965_c0_g1
TRINITY_DN30710_c0_g1
TRINITY_DN30743_c0_g2
TRINITY_DN92190_c0_g1
TRINITY_DN82688_c0_g1
TRINITY_DN82615_c0_g1
TRINITY_DN32920_c0_g1
TRINITY_DN54046_c0_g1
TRINITY_DN54088_c0_g1
TRINITY_DN88524_c0_g1
TRINITY_DN40939_c0_g1
TRINITY_DN40900_c1_g1
TRINITY_DN40926_c0_g1
TRINITY_DN40989_c0_g2
TRINITY_DN40982_c0_g1
TRINITY_DN30819_c2_g1
TRINITY_DN93764_c0_g1
TRINITY_DN53455_c0_g1
TRINITY_DN43480_c0_g3
TRINITY_DN43446_c0_g1
TRINITY_DN43452_c0_g1
TRINITY_DN72440_c0_g1
TRINITY_DN72441_c0_g1
TRINITY_DN25851_c0_g1
TRINITY_DN52704_c0_g1
TRINITY_DN52775_c0_g1
TRINITY_DN48966_c0_g1
TRINITY_DN48938_c0_g1
TRINITY_DN48938_c1_g1
TRINITY_DN48932_c0_g1
TRINITY_DN62500_c0_g1
TRINITY_DN36245_c0_g1
TRINITY_DN35724_c0_g1
TRINITY_DN84950_c0_g1
TRINITY_DN13104_c0_g1
TRINITY_DN42620_c0_g1
TRINITY_DN30919_c0_g1
TRINITY_DN28575_c0_g1
TRINITY_DN28515_c0_g1
TRINITY_DN69689_c0_g1
TRINITY_DN69641_c0_g1
TRINITY_DN70311_c0_g1
TRINITY_DN17340_c0_g1
TRINITY_DN55488_c0_g1
TRINITY_DN90115_c0_g1
TRINITY_DN67238_c0_g1
TRINITY_DN47597_c1_g1
TRINITY_DN47527_c0_g1
TRINITY_DN47519_c0_g1
TRINITY_DN47508_c1_g2
TRINITY_DN80498_c0_g1
TRINITY_DN80454_c0_g1
TRINITY_DN70709_c0_g1
TRINITY_DN49691_c1_g3
TRINITY_DN49674_c1_g1
TRINITY_DN49672_c3_g1
TRINITY_DN49652_c0_g1
TRINITY_DN49682_c0_g2
TRINITY_DN49688_c2_g1
TRINITY_DN49605_c0_g1
TRINITY_DN49690_c0_g3
TRINITY_DN49615_c0_g4
TRINITY_DN49687_c6_g7
TRINITY_DN49681_c1_g2
TRINITY_DN49673_c2_g1
TRINITY_DN30462_c0_g1
TRINITY_DN96442_c0_g1
TRINITY_DN96481_c0_g1
TRINITY_DN91427_c0_g1
TRINITY_DN28142_c0_g1
TRINITY_DN7576_c0_g1
TRINITY_DN16032_c0_g1
TRINITY_DN88186_c0_g1
TRINITY_DN88164_c0_g1
TRINITY_DN88174_c0_g1
TRINITY_DN88125_c0_g1
TRINITY_DN73744_c0_g1
TRINITY_DN15171_c0_g1
TRINITY_DN15109_c0_g1
TRINITY_DN48557_c0_g2
TRINITY_DN48584_c1_g1
TRINITY_DN20289_c0_g1
TRINITY_DN19712_c0_g1
TRINITY_DN44352_c0_g1
TRINITY_DN44358_c0_g1
TRINITY_DN44301_c0_g4
TRINITY_DN20824_c0_g1
TRINITY_DN20886_c0_g1
TRINITY_DN65197_c0_g1
TRINITY_DN51240_c2_g1
TRINITY_DN51239_c2_g1
TRINITY_DN51295_c0_g4
TRINITY_DN51237_c0_g1
TRINITY_DN51287_c0_g1
TRINITY_DN38651_c0_g1
TRINITY_DN38685_c0_g1
TRINITY_DN38613_c0_g1
TRINITY_DN38679_c0_g1
TRINITY_DN38605_c0_g1
TRINITY_DN44816_c0_g2
TRINITY_DN44899_c0_g3
TRINITY_DN44835_c1_g1
TRINITY_DN13061_c0_g1
TRINITY_DN47272_c0_g1
TRINITY_DN47294_c0_g1
TRINITY_DN47252_c0_g1
TRINITY_DN47252_c0_g2
TRINITY_DN47264_c0_g3
TRINITY_DN47225_c0_g1
TRINITY_DN63933_c0_g1
TRINITY_DN18941_c0_g1
TRINITY_DN88285_c0_g1
TRINITY_DN88212_c0_g1
TRINITY_DN60895_c0_g1
TRINITY_DN29610_c0_g1
TRINITY_DN29658_c0_g1
TRINITY_DN29663_c0_g1
TRINITY_DN62674_c0_g1
TRINITY_DN62651_c0_g1
TRINITY_DN29807_c0_g1
TRINITY_DN29899_c0_g1
TRINITY_DN26264_c0_g1
TRINITY_DN16585_c0_g1
TRINITY_DN41135_c0_g1
TRINITY_DN41174_c0_g1
TRINITY_DN77445_c0_g1
TRINITY_DN97793_c0_g1
TRINITY_DN97701_c0_g1
TRINITY_DN79352_c0_g1
TRINITY_DN21969_c0_g1
TRINITY_DN21927_c0_g1
TRINITY_DN42460_c0_g1
TRINITY_DN42476_c0_g2
TRINITY_DN42442_c0_g1
TRINITY_DN42436_c0_g1
TRINITY_DN51947_c0_g1
TRINITY_DN51921_c0_g1
TRINITY_DN51987_c0_g1
TRINITY_DN51993_c1_g1
TRINITY_DN74183_c0_g1
TRINITY_DN6264_c0_g1
TRINITY_DN86291_c0_g1
TRINITY_DN75493_c0_g1
TRINITY_DN51511_c0_g1
TRINITY_DN51546_c0_g4
TRINITY_DN51524_c0_g2
TRINITY_DN51592_c0_g1
TRINITY_DN51540_c4_g2
TRINITY_DN42136_c0_g1
TRINITY_DN42187_c2_g3
TRINITY_DN42170_c0_g3
TRINITY_DN26337_c0_g2
TRINITY_DN1116_c0_g1
TRINITY_DN53099_c0_g1
TRINITY_DN71062_c0_g1
TRINITY_DN71044_c0_g1
TRINITY_DN71050_c0_g1
TRINITY_DN44779_c0_g1
TRINITY_DN44771_c0_g1
TRINITY_DN44793_c0_g1
TRINITY_DN44745_c0_g1
TRINITY_DN68743_c0_g1
TRINITY_DN64767_c0_g1
TRINITY_DN6303_c0_g1
TRINITY_DN53761_c0_g1
TRINITY_DN99360_c0_g1
TRINITY_DN54262_c0_g1
TRINITY_DN54256_c0_g1
TRINITY_DN90531_c0_g1
TRINITY_DN66911_c0_g1
TRINITY_DN33312_c0_g1
TRINITY_DN45402_c0_g2
TRINITY_DN45428_c1_g1
TRINITY_DN45434_c1_g1
TRINITY_DN78348_c0_g1
TRINITY_DN11994_c0_g1
TRINITY_DN84201_c0_g1
TRINITY_DN73807_c0_g1
TRINITY_DN40150_c0_g1
TRINITY_DN40117_c0_g1
TRINITY_DN32633_c0_g1
TRINITY_DN32641_c0_g1
TRINITY_DN35547_c0_g1
TRINITY_DN27001_c0_g1
TRINITY_DN90237_c0_g1
TRINITY_DN44234_c0_g1
TRINITY_DN44237_c0_g1
TRINITY_DN44211_c0_g1
TRINITY_DN1911_c0_g1
TRINITY_DN45381_c0_g2
TRINITY_DN45310_c0_g1
TRINITY_DN34880_c0_g1
TRINITY_DN74635_c0_g1
TRINITY_DN39385_c0_g1
TRINITY_DN39374_c0_g1
TRINITY_DN39328_c0_g1
TRINITY_DN98062_c0_g1
TRINITY_DN883_c0_g1
TRINITY_DN34172_c0_g1
TRINITY_DN20557_c0_g1
TRINITY_DN1317_c0_g1
TRINITY_DN49769_c1_g1
TRINITY_DN35324_c1_g1
TRINITY_DN35354_c0_g1
TRINITY_DN30527_c0_g1
TRINITY_DN98697_c0_g1
TRINITY_DN98654_c0_g1
TRINITY_DN34926_c0_g1
TRINITY_DN34985_c0_g1
TRINITY_DN34954_c1_g1
TRINITY_DN24141_c0_g1
TRINITY_DN24162_c0_g1
TRINITY_DN24198_c0_g1
TRINITY_DN24117_c0_g1
TRINITY_DN6103_c0_g1
TRINITY_DN19102_c0_g1
TRINITY_DN19110_c0_g1
TRINITY_DN41497_c0_g1
TRINITY_DN41404_c0_g2
TRINITY_DN41404_c0_g1
TRINITY_DN41442_c0_g1
TRINITY_DN45126_c0_g2
TRINITY_DN45124_c0_g1
TRINITY_DN45194_c1_g1
TRINITY_DN45185_c0_g1
TRINITY_DN45109_c0_g1
TRINITY_DN45109_c0_g2
TRINITY_DN50237_c5_g1
TRINITY_DN50271_c1_g1
TRINITY_DN50210_c0_g2
TRINITY_DN50255_c0_g3
TRINITY_DN50235_c0_g2
TRINITY_DN85480_c0_g1
TRINITY_DN6845_c0_g1
TRINITY_DN28894_c0_g1
TRINITY_DN28805_c0_g1
TRINITY_DN40576_c0_g1
TRINITY_DN40587_c0_g1
TRINITY_DN90356_c0_g1
TRINITY_DN23398_c0_g1
TRINITY_DN19097_c0_g1
TRINITY_DN19090_c0_g1
TRINITY_DN18577_c0_g1
TRINITY_DN33266_c0_g1
TRINITY_DN87954_c0_g1
TRINITY_DN45892_c0_g1
TRINITY_DN45834_c0_g1
TRINITY_DN45877_c0_g2
TRINITY_DN45886_c1_g1
TRINITY_DN45850_c4_g4
TRINITY_DN23260_c1_g2
TRINITY_DN29030_c0_g1
TRINITY_DN30171_c0_g1
TRINITY_DN92447_c0_g1
TRINITY_DN47943_c3_g1
TRINITY_DN47926_c4_g1
TRINITY_DN47917_c0_g2
TRINITY_DN35163_c0_g1
TRINITY_DN96186_c0_g1
TRINITY_DN71214_c0_g1
TRINITY_DN23611_c0_g2
TRINITY_DN23640_c0_g1
TRINITY_DN43516_c0_g1
TRINITY_DN43550_c0_g1
TRINITY_DN72083_c0_g1
TRINITY_DN13935_c0_g1
TRINITY_DN13353_c0_g1
TRINITY_DN80910_c0_g1
TRINITY_DN63716_c0_g1
TRINITY_DN65863_c0_g1
TRINITY_DN35979_c0_g1
TRINITY_DN13784_c0_g1
TRINITY_DN680_c0_g1
TRINITY_DN28462_c0_g1
TRINITY_DN28490_c0_g1
TRINITY_DN74464_c0_g1
TRINITY_DN74490_c0_g1
TRINITY_DN74498_c0_g1
TRINITY_DN86451_c0_g1
TRINITY_DN68050_c0_g1
TRINITY_DN79221_c0_g1
TRINITY_DN46220_c0_g1
TRINITY_DN46287_c0_g1
TRINITY_DN46207_c1_g1
TRINITY_DN46239_c0_g1
TRINITY_DN60391_c0_g1
TRINITY_DN2789_c0_g1
TRINITY_DN50359_c1_g1
TRINITY_DN50328_c2_g1
TRINITY_DN50339_c0_g1
TRINITY_DN50322_c0_g1
TRINITY_DN50375_c0_g1
TRINITY_DN50377_c0_g1
TRINITY_DN50386_c7_g1
TRINITY_DN5365_c0_g1
TRINITY_DN25712_c0_g1
TRINITY_DN91559_c0_g1
TRINITY_DN90862_c0_g1
TRINITY_DN19521_c0_g1
TRINITY_DN78237_c0_g1
TRINITY_DN78269_c0_g1
TRINITY_DN67734_c0_g1
TRINITY_DN52237_c0_g1
TRINITY_DN52248_c1_g2
TRINITY_DN52273_c2_g4
TRINITY_DN29921_c0_g1
TRINITY_DN39233_c0_g1
TRINITY_DN39237_c0_g1
TRINITY_DN39267_c0_g1
TRINITY_DN39287_c0_g1
TRINITY_DN39275_c0_g1
TRINITY_DN49961_c0_g2
TRINITY_DN49992_c3_g3
TRINITY_DN49924_c0_g1
TRINITY_DN49974_c3_g1
TRINITY_DN49932_c0_g2
TRINITY_DN31828_c0_g1
TRINITY_DN31869_c0_g1
TRINITY_DN31860_c0_g2
TRINITY_DN87746_c0_g1
TRINITY_DN73325_c0_g1
TRINITY_DN8346_c0_g1
TRINITY_DN61679_c0_g1
TRINITY_DN61693_c0_g1
TRINITY_DN4785_c0_g1
TRINITY_DN79976_c0_g1
TRINITY_DN51479_c0_g2
TRINITY_DN51479_c0_g1
TRINITY_DN51468_c1_g2
TRINITY_DN51488_c1_g1
TRINITY_DN72551_c0_g1
TRINITY_DN72519_c0_g1
TRINITY_DN49306_c1_g4
TRINITY_DN49316_c1_g1
TRINITY_DN49395_c0_g2
TRINITY_DN19838_c0_g1
TRINITY_DN19853_c0_g1
TRINITY_DN22719_c0_g1
TRINITY_DN8508_c0_g1
TRINITY_DN27851_c0_g1
TRINITY_DN95158_c0_g1
TRINITY_DN19499_c0_g1
TRINITY_DN86689_c0_g1
TRINITY_DN45539_c0_g1
TRINITY_DN45595_c0_g1
TRINITY_DN36146_c1_g2
TRINITY_DN36165_c0_g2
TRINITY_DN68920_c0_g1
TRINITY_DN68962_c0_g1
TRINITY_DN4840_c0_g1
TRINITY_DN25631_c0_g1
TRINITY_DN25669_c0_g1
TRINITY_DN71162_c0_g1
TRINITY_DN40755_c1_g1
TRINITY_DN40766_c0_g1
TRINITY_DN23457_c0_g1
TRINITY_DN51077_c0_g1
TRINITY_DN51062_c1_g1
TRINITY_DN62915_c0_g1
TRINITY_DN62937_c0_g1
TRINITY_DN94237_c0_g1
TRINITY_DN49502_c0_g1
TRINITY_DN49530_c0_g1
TRINITY_DN49530_c2_g1
TRINITY_DN49561_c2_g1
TRINITY_DN52179_c0_g1
TRINITY_DN52161_c1_g1
TRINITY_DN52134_c0_g1
TRINITY_DN52134_c0_g2
TRINITY_DN52191_c1_g1
TRINITY_DN52198_c1_g3
TRINITY_DN52176_c3_g1
TRINITY_DN52120_c0_g1
TRINITY_DN52172_c0_g1
TRINITY_DN52180_c1_g2
TRINITY_DN56777_c0_g1
TRINITY_DN22938_c0_g1
TRINITY_DN22909_c0_g1
TRINITY_DN69802_c0_g1
TRINITY_DN81389_c0_g1
TRINITY_DN58002_c0_g1
TRINITY_DN51311_c4_g2
TRINITY_DN51311_c4_g1
TRINITY_DN51370_c0_g1
TRINITY_DN44413_c0_g2
TRINITY_DN44421_c0_g2
TRINITY_DN44497_c0_g1
TRINITY_DN44472_c0_g1
TRINITY_DN44434_c0_g3
TRINITY_DN6780_c0_g1
TRINITY_DN6732_c0_g1
TRINITY_DN6706_c0_g1
TRINITY_DN85987_c0_g1
TRINITY_DN85251_c0_g1
TRINITY_DN50050_c0_g1
TRINITY_DN50089_c0_g1
TRINITY_DN50059_c2_g1
TRINITY_DN10020_c0_g1
TRINITY_DN10339_c0_g1
TRINITY_DN10301_c0_g1
TRINITY_DN10315_c0_g1
TRINITY_DN10379_c0_g1
TRINITY_DN50185_c0_g1
TRINITY_DN50173_c2_g1
TRINITY_DN50195_c0_g1
TRINITY_DN50187_c0_g1
TRINITY_DN50155_c1_g1
TRINITY_DN50192_c0_g1
TRINITY_DN50112_c1_g3
TRINITY_DN48638_c0_g3
TRINITY_DN48629_c0_g1
TRINITY_DN48634_c0_g1
TRINITY_DN48639_c0_g1
TRINITY_DN72354_c0_g1
TRINITY_DN35034_c0_g1
TRINITY_DN35069_c0_g1
TRINITY_DN37583_c0_g1
TRINITY_DN46785_c1_g1
TRINITY_DN88607_c0_g1
TRINITY_DN42088_c0_g1
TRINITY_DN42086_c0_g1
TRINITY_DN42833_c0_g1
TRINITY_DN42823_c0_g1
TRINITY_DN42823_c1_g1
TRINITY_DN42872_c0_g1
TRINITY_DN58817_c0_g1
TRINITY_DN58834_c0_g1
TRINITY_DN26183_c0_g1
TRINITY_DN49062_c0_g4
TRINITY_DN49032_c0_g1
TRINITY_DN49077_c2_g1
TRINITY_DN49077_c2_g2
TRINITY_DN49056_c0_g2
TRINITY_DN49051_c0_g2
TRINITY_DN49007_c0_g1
TRINITY_DN3829_c0_g1
TRINITY_DN3882_c0_g1
TRINITY_DN97033_c0_g1
TRINITY_DN37043_c0_g1
TRINITY_DN37055_c0_g1
TRINITY_DN10787_c0_g1
TRINITY_DN67944_c0_g1
TRINITY_DN93010_c0_g1
TRINITY_DN79831_c0_g1
TRINITY_DN26520_c0_g1
TRINITY_DN32438_c0_g1
TRINITY_DN92839_c0_g1
TRINITY_DN41773_c0_g1
TRINITY_DN41761_c0_g1
TRINITY_DN41706_c0_g1
TRINITY_DN77166_c0_g1
TRINITY_DN75651_c0_g1
TRINITY_DN36922_c0_g1
TRINITY_DN36990_c0_g1
TRINITY_DN36970_c0_g2
TRINITY_DN36976_c0_g1
TRINITY_DN98413_c0_g1
TRINITY_DN71717_c0_g1
TRINITY_DN46665_c1_g1
TRINITY_DN46605_c3_g1
TRINITY_DN46652_c0_g1
TRINITY_DN90081_c0_g1
TRINITY_DN5177_c0_g1
TRINITY_DN98821_c0_g1
TRINITY_DN2152_c0_g1
TRINITY_DN2177_c0_g1
TRINITY_DN36425_c0_g2
TRINITY_DN36444_c0_g1
TRINITY_DN36460_c0_g1
TRINITY_DN36473_c0_g1
TRINITY_DN45772_c2_g1
TRINITY_DN45776_c0_g1
TRINITY_DN45778_c0_g2
TRINITY_DN65321_c0_g1
TRINITY_DN65376_c0_g1
TRINITY_DN89136_c0_g1
TRINITY_DN15507_c0_g1
TRINITY_DN24032_c0_g1
TRINITY_DN24085_c0_g2
TRINITY_DN41666_c0_g1
TRINITY_DN41626_c0_g1
TRINITY_DN49494_c5_g1
TRINITY_DN49484_c1_g1
TRINITY_DN49418_c0_g1
TRINITY_DN49491_c0_g1
TRINITY_DN41227_c1_g1
TRINITY_DN41234_c0_g1
TRINITY_DN41234_c0_g2
TRINITY_DN37485_c0_g1
TRINITY_DN37429_c0_g1
TRINITY_DN69527_c0_g1
TRINITY_DN17774_c0_g1
TRINITY_DN204_c0_g1
TRINITY_DN90618_c0_g1
TRINITY_DN101243_c0_g1
TRINITY_DN101216_c0_g1
TRINITY_DN102418_c0_g1
TRINITY_DN100976_c0_g1
TRINITY_DN100939_c0_g1
TRINITY_DN100931_c0_g1
TRINITY_DN101162_c0_g1
TRINITY_DN102647_c0_g1
TRINITY_DN100052_c0_g1
TRINITY_DN100010_c0_g1
TRINITY_DN101595_c0_g1
TRINITY_DN101396_c0_g1
TRINITY_DN100462_c0_g1
TRINITY_DN101036_c0_g1
TRINITY_DN101014_c0_g1
TRINITY_DN100883_c0_g1
TRINITY_DN100845_c0_g1
TRINITY_DN46393_c0_g3
TRINITY_DN46318_c0_g2
TRINITY_DN46318_c0_g3
TRINITY_DN28648_c0_g1
TRINITY_DN28648_c0_g2
TRINITY_DN71574_c0_g1
TRINITY_DN38016_c0_g3
TRINITY_DN38035_c0_g1
TRINITY_DN38059_c0_g1
TRINITY_DN4427_c0_g1
TRINITY_DN34240_c0_g1
TRINITY_DN36546_c0_g1
TRINITY_DN36544_c0_g1
TRINITY_DN86075_c0_g1
TRINITY_DN32586_c0_g1
TRINITY_DN44596_c0_g1
TRINITY_DN47003_c0_g2
TRINITY_DN47045_c0_g1
TRINITY_DN39769_c0_g2
TRINITY_DN39735_c0_g1
TRINITY_DN88486_c0_g1
TRINITY_DN88407_c0_g1
TRINITY_DN29180_c0_g1
TRINITY_DN29100_c0_g2
TRINITY_DN7245_c0_g1
TRINITY_DN43281_c0_g1
TRINITY_DN99133_c0_g1
TRINITY_DN76004_c0_g1
TRINITY_DN17097_c0_g1
TRINITY_DN46024_c2_g1
TRINITY_DN46001_c0_g1
TRINITY_DN46061_c0_g1
TRINITY_DN46014_c0_g1
TRINITY_DN46007_c1_g3
TRINITY_DN7924_c0_g1
TRINITY_DN7951_c0_g1
TRINITY_DN7974_c0_g1
TRINITY_DN29733_c0_g1
TRINITY_DN29203_c0_g1
TRINITY_DN17123_c0_g1
TRINITY_DN17141_c0_g1
TRINITY_DN16234_c0_g1
TRINITY_DN40866_c0_g1
TRINITY_DN58567_c0_g1
TRINITY_DN58534_c0_g1
TRINITY_DN27276_c0_g1
TRINITY_DN27219_c0_g1
TRINITY_DN27277_c0_g1
TRINITY_DN38299_c0_g2
TRINITY_DN34338_c0_g1
TRINITY_DN34326_c0_g1
TRINITY_DN1594_c0_g1
TRINITY_DN89798_c0_g1
TRINITY_DN38359_c0_g1
TRINITY_DN38379_c0_g1
TRINITY_DN59971_c0_g1
TRINITY_DN59900_c0_g1
TRINITY_DN99490_c0_g1
TRINITY_DN34545_c0_g1
TRINITY_DN34563_c0_g1
TRINITY_DN40494_c0_g1
TRINITY_DN40402_c0_g2
TRINITY_DN40480_c0_g1
TRINITY_DN40463_c0_g1
TRINITY_DN169_c0_g1
TRINITY_DN58243_c0_g1
TRINITY_DN67334_c0_g1
TRINITY_DN28335_c0_g1
TRINITY_DN48208_c0_g1
TRINITY_DN48217_c1_g1
TRINITY_DN48271_c0_g2
TRINITY_DN48213_c0_g1
TRINITY_DN933_c0_g1
TRINITY_DN40382_c0_g2
TRINITY_DN40300_c0_g1
TRINITY_DN40316_c0_g1
TRINITY_DN40317_c0_g1
TRINITY_DN40380_c0_g1
TRINITY_DN53576_c0_g1
TRINITY_DN50636_c3_g1
TRINITY_DN50613_c0_g1
TRINITY_DN50686_c0_g1
TRINITY_DN43061_c0_g1
TRINITY_DN69192_c0_g1
TRINITY_DN5933_c0_g1
TRINITY_DN46435_c0_g1
TRINITY_DN73232_c0_g1
TRINITY_DN8604_c0_g1
TRINITY_DN10638_c0_g1
TRINITY_DN38804_c0_g2
TRINITY_DN38891_c0_g2
TRINITY_DN38891_c0_g1
TRINITY_DN38815_c0_g1
TRINITY_DN38879_c0_g1
TRINITY_DN5059_c0_g1
TRINITY_DN48084_c0_g2
TRINITY_DN48083_c2_g1
TRINITY_DN46979_c0_g2
TRINITY_DN78429_c0_g1
TRINITY_DN78478_c0_g1
TRINITY_DN47464_c0_g1
TRINITY_DN47480_c0_g2
TRINITY_DN47437_c0_g1
TRINITY_DN47402_c0_g1
TRINITY_DN47434_c0_g1
TRINITY_DN99552_c0_g1
TRINITY_DN57649_c0_g1
TRINITY_DN56548_c0_g1
TRINITY_DN50823_c1_g1
TRINITY_DN50844_c4_g1
TRINITY_DN50844_c4_g2
TRINITY_DN50865_c0_g2
TRINITY_DN32843_c0_g1
TRINITY_DN32804_c0_g1
TRINITY_DN76151_c0_g1
TRINITY_DN76690_c0_g1
TRINITY_DN76638_c0_g1
TRINITY_DN76697_c0_g1
TRINITY_DN41815_c0_g1
TRINITY_DN41851_c0_g1
TRINITY_DN5756_c0_g1
TRINITY_DN42780_c0_g1
TRINITY_DN42784_c0_g1
TRINITY_DN80518_c0_g1
TRINITY_DN80566_c0_g1
TRINITY_DN26915_c0_g1
TRINITY_DN26950_c0_g1
TRINITY_DN67119_c0_g1
TRINITY_DN51102_c1_g1
TRINITY_DN51123_c3_g2
TRINITY_DN2359_c0_g1
TRINITY_DN25919_c0_g1
TRINITY_DN93177_c0_g1
TRINITY_DN41954_c0_g1
TRINITY_DN41954_c0_g2
TRINITY_DN41941_c0_g2
TRINITY_DN38189_c1_g1
TRINITY_DN38149_c0_g1
TRINITY_DN38173_c0_g1
TRINITY_DN43752_c0_g1
TRINITY_DN43716_c0_g1
TRINITY_DN44109_c0_g2
TRINITY_DN44121_c1_g2
TRINITY_DN44157_c0_g1
TRINITY_DN27334_c0_g1
TRINITY_DN13242_c0_g1
TRINITY_DN42508_c0_g1
TRINITY_DN42500_c0_g1
TRINITY_DN42551_c0_g1
TRINITY_DN39896_c0_g1
TRINITY_DN51862_c1_g1
TRINITY_DN51815_c3_g1
TRINITY_DN51829_c0_g2
TRINITY_DN51861_c1_g1
TRINITY_DN51850_c0_g2
TRINITY_DN67422_c0_g1
TRINITY_DN24282_c0_g1
TRINITY_DN63152_c0_g1
TRINITY_DN81561_c0_g1
TRINITY_DN12640_c0_g1
TRINITY_DN12688_c0_g1
TRINITY_DN9521_c0_g1
TRINITY_DN9562_c0_g1
TRINITY_DN9518_c0_g1
TRINITY_DN12994_c0_g1
TRINITY_DN41542_c1_g1
TRINITY_DN90774_c0_g1
TRINITY_DN32005_c0_g1
TRINITY_DN32055_c1_g1
TRINITY_DN64575_c0_g1
TRINITY_DN11626_c0_g1
TRINITY_DN98913_c0_g1
TRINITY_DN6455_c0_g1
TRINITY_DN47117_c0_g1
TRINITY_DN47168_c2_g2
TRINITY_DN47193_c0_g3
TRINITY_DN47131_c0_g1
TRINITY_DN76799_c0_g1
TRINITY_DN76741_c0_g1
TRINITY_DN38704_c0_g1
TRINITY_DN38720_c0_g1
TRINITY_DN29407_c0_g1
TRINITY_DN49287_c0_g1
TRINITY_DN49246_c2_g1
TRINITY_DN14781_c0_g1
TRINITY_DN46159_c0_g1
TRINITY_DN46187_c0_g1
TRINITY_DN46108_c0_g1
TRINITY_DN46195_c0_g1
TRINITY_DN96071_c0_g1
TRINITY_DN3033_c0_g1
TRINITY_DN77083_c0_g1
TRINITY_DN66692_c0_g1
TRINITY_DN70288_c0_g1
TRINITY_DN71309_c0_g1
TRINITY_DN71386_c0_g1
TRINITY_DN87201_c0_g1
TRINITY_DN87895_c0_g1
TRINITY_DN56190_c0_g1
TRINITY_DN59523_c0_g1
TRINITY_DN42244_c1_g1
TRINITY_DN42260_c0_g1
TRINITY_DN78699_c0_g1
TRINITY_DN91791_c0_g1
TRINITY_DN2583_c0_g1
TRINITY_DN35439_c0_g1
TRINITY_DN35434_c0_g1
TRINITY_DN35445_c0_g1
TRINITY_DN17612_c0_g1
TRINITY_DN57231_c0_g1
TRINITY_DN9964_c0_g1
TRINITY_DN80819_c0_g1
TRINITY_DN68289_c0_g1
TRINITY_DN64188_c0_g1
TRINITY_DN64160_c0_g1
TRINITY_DN37751_c0_g1
TRINITY_DN26630_c0_g1
TRINITY_DN31440_c0_g1
TRINITY_DN31400_c0_g1
TRINITY_DN35246_c0_g1
TRINITY_DN35207_c0_g2
TRINITY_DN85610_c0_g1
TRINITY_DN18691_c0_g1
TRINITY_DN24612_c0_g1
TRINITY_DN24659_c0_g2
TRINITY_DN4050_c0_g1
TRINITY_DN4042_c0_g1
TRINITY_DN34705_c0_g1
TRINITY_DN38413_c0_g1
TRINITY_DN38400_c1_g1
TRINITY_DN38435_c0_g1
TRINITY_DN38463_c1_g1
TRINITY_DN38468_c0_g1
TRINITY_DN38479_c0_g1
TRINITY_DN38454_c0_g1
TRINITY_DN57977_c0_g1
TRINITY_DN63333_c0_g1
TRINITY_DN92341_c0_g1
TRINITY_DN92385_c0_g1
TRINITY_DN39647_c0_g1
TRINITY_DN39654_c0_g1
TRINITY_DN36702_c0_g1
TRINITY_DN36760_c1_g1
TRINITY_DN74236_c0_g1
TRINITY_DN97965_c0_g1
TRINITY_DN44615_c0_g1
TRINITY_DN22885_c0_g1
TRINITY_DN94591_c0_g1
TRINITY_DN94530_c0_g1
TRINITY_DN37251_c0_g1
TRINITY_DN37299_c1_g1
TRINITY_DN44009_c0_g1
TRINITY_DN22104_c0_g1
TRINITY_DN22149_c0_g1
TRINITY_DN22155_c0_g1
TRINITY_DN47808_c0_g1
TRINITY_DN47846_c0_g1
TRINITY_DN47854_c2_g2
TRINITY_DN47854_c3_g1
TRINITY_DN47854_c3_g3
TRINITY_DN47818_c2_g3
TRINITY_DN46867_c0_g1
TRINITY_DN46855_c0_g1
TRINITY_DN46828_c1_g1
TRINITY_DN46837_c0_g1
TRINITY_DN46821_c0_g1
TRINITY_DN46812_c2_g2
TRINITY_DN46812_c5_g2
TRINITY_DN58412_c0_g1
TRINITY_DN36347_c0_g1
TRINITY_DN95839_c0_g1
TRINITY_DN95869_c0_g1
TRINITY_DN52432_c12_g2
TRINITY_DN52416_c1_g1
TRINITY_DN79094_c0_g1
TRINITY_DN32717_c0_g2
TRINITY_DN32765_c0_g1
TRINITY_DN27433_c0_g1
TRINITY_DN11517_c0_g1
TRINITY_DN24840_c0_g1
TRINITY_DN24828_c0_g1
TRINITY_DN38548_c0_g1
TRINITY_DN12384_c0_g1
TRINITY_DN95261_c0_g1
TRINITY_DN95297_c0_g1
TRINITY_DN95269_c0_g1
TRINITY_DN35809_c0_g1
TRINITY_DN63626_c0_g1
TRINITY_DN63641_c0_g1
TRINITY_DN82107_c0_g1
TRINITY_DN77939_c0_g1
TRINITY_DN13869_c0_g1
TRINITY_DN13833_c0_g1
TRINITY_DN9732_c0_g1
TRINITY_DN9743_c0_g1
TRINITY_DN31021_c0_g1
TRINITY_DN31047_c0_g1
TRINITY_DN8125_c0_g1
TRINITY_DN47618_c0_g1
TRINITY_DN47676_c0_g1
TRINITY_DN76217_c0_g1
TRINITY_DN68582_c0_g1
TRINITY_DN45260_c0_g1
TRINITY_DN45270_c0_g1
TRINITY_DN31242_c0_g1
TRINITY_DN50491_c3_g3
TRINITY_DN50425_c1_g1
TRINITY_DN50478_c2_g2
TRINITY_DN43900_c0_g2
TRINITY_DN43982_c0_g2
TRINITY_DN43930_c0_g1
TRINITY_DN12515_c0_g1
TRINITY_DN32288_c0_g1
TRINITY_DN83601_c0_g1
TRINITY_DN83640_c0_g1
TRINITY_DN52060_c0_g1
TRINITY_DN52088_c2_g2
TRINITY_DN48798_c0_g1
TRINITY_DN48755_c0_g1
TRINITY_DN82085_c0_g1
TRINITY_DN86328_c0_g1
TRINITY_DN59656_c0_g1
TRINITY_DN56499_c0_g1
TRINITY_DN56482_c0_g1
TRINITY_DN10572_c0_g1
TRINITY_DN10574_c0_g1
TRINITY_DN31334_c0_g1
TRINITY_DN31343_c0_g1
TRINITY_DN80154_c0_g1
TRINITY_DN50776_c1_g1
TRINITY_DN50746_c0_g1
TRINITY_DN50709_c0_g1
TRINITY_DN50794_c3_g1
TRINITY_DN50795_c2_g1
TRINITY_DN50711_c2_g2
TRINITY_DN33955_c0_g1
TRINITY_DN33828_c0_g1
TRINITY_DN2438_c0_g1
TRINITY_DN2482_c0_g1
TRINITY_DN6061_c0_g1
TRINITY_DN52575_c58_g1
TRINITY_DN52539_c0_g1
TRINITY_DN52505_c2_g1
TRINITY_DN52526_c7_g1
TRINITY_DN2879_c0_g1
TRINITY_DN45042_c0_g1

## Sheet: Common in Swiss-Prot Pfam
Common elements in Swiss-Prot Pfam :
TRINITY_DN61071_c0_g1
TRINITY_DN33808_c0_g1
TRINITY_DN30757_c0_g1
TRINITY_DN55150_c0_g1
TRINITY_DN93767_c0_g1
TRINITY_DN64280_c0_g1
TRINITY_DN42605_c0_g1
TRINITY_DN17341_c0_g1
TRINITY_DN80413_c0_g1
TRINITY_DN3133_c0_g1
TRINITY_DN20860_c0_g1
TRINITY_DN39017_c0_g1
TRINITY_DN59757_c0_g1
TRINITY_DN11260_c0_g1
TRINITY_DN19131_c0_g1
TRINITY_DN50204_c0_g6
TRINITY_DN87950_c0_g1
TRINITY_DN68813_c0_g1
TRINITY_DN73156_c0_g1
TRINITY_DN37502_c0_g1
TRINITY_DN37502_c0_g2
TRINITY_DN79809_c0_g1
TRINITY_DN41745_c0_g1
TRINITY_DN83348_c0_g1
TRINITY_DN90018_c0_g1
TRINITY_DN5496_c0_g1
TRINITY_DN61345_c0_g1
TRINITY_DN3793_c0_g1
TRINITY_DN81502_c0_g1
TRINITY_DN69970_c0_g1
TRINITY_DN81876_c0_g1
TRINITY_DN38791_c0_g1
TRINITY_DN62213_c0_g1
TRINITY_DN96032_c0_g1
TRINITY_DN70279_c0_g1
TRINITY_DN73563_c0_g1
TRINITY_DN42250_c0_g2
TRINITY_DN18655_c0_g1
TRINITY_DN72290_c0_g1
TRINITY_DN27468_c0_g1
TRINITY_DN11599_c0_g1
TRINITY_DN93656_c0_g1
TRINITY_DN35999_c0_g1
TRINITY_DN33168_c0_g1
TRINITY_DN78223_c0_g1
TRINITY_DN99264_c0_g1
TRINITY_DN102562_c0_g1
TRINITY_DN100851_c0_g1
TRINITY_DN36893_c0_g1
TRINITY_DN71964_c0_g1
TRINITY_DN27759_c0_g1
TRINITY_DN58775_c0_g1
TRINITY_DN63577_c0_g1
TRINITY_DN21900_c0_g1
TRINITY_DN74163_c0_g1
TRINITY_DN74156_c0_g1
TRINITY_DN93965_c0_g1
TRINITY_DN71096_c0_g1
TRINITY_DN53561_c0_g1
TRINITY_DN47359_c1_g1
TRINITY_DN47359_c1_g2
TRINITY_DN98796_c0_g1
TRINITY_DN62883_c0_g1
TRINITY_DN42910_c0_g1
TRINITY_DN60561_c0_g1
TRINITY_DN50967_c1_g1
TRINITY_DN86596_c0_g1
TRINITY_DN78741_c0_g1
TRINITY_DN54119_c0_g1
TRINITY_DN53659_c0_g1
TRINITY_DN96663_c0_g1
TRINITY_DN52366_c3_g1
TRINITY_DN58024_c0_g1
TRINITY_DN85959_c0_g1

[truncated: 2 more sheets: Common elements in Pfam KEGG, Common in Swiss-Prot COG]
