# Supplementary material for: Transcriptomic analysis reveals key genes related to antioxidant mechanisms of Hylocereus undatus quality improvement by trypsin during storage
Source: Royal Society of Chemistry journal article supplement (doi:10.1039/c9fo00809h), 2019-01-01
Supplement: c9fo00809h5.xlsx [file c9fo00809h5.xlsx]

## Sheet: Degree by cytoscape 105up30改名Hu
name	shared name	AverageShortestPathLength	BetweennessCentrality	ClosenessCentrality	ClusteringCoefficient	Eccentricity	EdgeCount	Indegree	IsSingleNode	NeighborhoodConnectivity	Outdegree	PartnerOfMultiEdgedNodePairs	selected	SelfLoops	Stress
HuPOD5	POD5	0	0	0	0	0	0	0	FALSE	0	0	0	FALSE	0	0
HuPOD13	POD44	0	0	0	0	0	0	0	FALSE	0	0	0	FALSE	0	0
HuAPX6	APX6	1	0	1	0.5	1	4	3	FALSE	8.75	1	0	FALSE	0	0
HuAPX2	APX2	1	0	1	0.5	1	5	4	FALSE	8.4	1	0	FALSE	0	0
HuGPX8	GPX8	0	0	0	0.5	0	3	3	FALSE	9	0	0	FALSE	0	0
HuGPX6	GPX6	1.5	0	0.666667	0.5	2	5	3	FALSE	8.4	2	0	FALSE	0	0
HuCAT	CAT	1	0	1	0.319444	1	9	2	FALSE	6.11111	7	0	FALSE	0	0
HuTRX	AT1G21350	0	0	0	0.375	0	8	8	FALSE	6.625	0	0	FALSE	0	0
HuTAPX	TAPX	1	0	1	0.5	1	5	4	FALSE	8.4	1	0	FALSE	0	0
HuPRXQ	PRXQ	1	0.0277778	1	0.428571	1	7	4	FALSE	7.14286	3	0	FALSE	0	2
HuFSD3	FSD3	1	0	1	0.319444	1	9	1	FALSE	6.11111	8	0	FALSE	0	0
HuFSD2	FSD2	1	0	1	0.319444	1	9	0	FALSE	6.11111	9	0	FALSE	0	0
