# Supplementary material for: Transcriptomic analysis reveals key genes related to antioxidant mechanisms of Hylocereus undatus quality improvement by trypsin during storage
Source: Royal Society of Chemistry journal article supplement (doi:10.1039/c9fo00809h), 2019-01-01
Supplement: c9fo00809h6.xlsx [file c9fo00809h6.xlsx]

## Sheet: Degree by cytoscape anti105down
name	shared name	AverageShortestPathLength	BetweennessCentrality	ClosenessCentrality	ClusteringCoefficient	Eccentricity	EdgeCount	Indegree	IsSingleNode	NeighborhoodConnectivity	Outdegree	PartnerOfMultiEdgedNodePairs	selected	SelfLoops	Stress
HuPOD12	POD12	0	0	0	0	0	0	0	FALSE	0	0	0	FALSE	0	0
HuPOD4	POD4	0	0	0	0	0	0	0	FALSE	0	0	0	FALSE	0	0
HuPOD63	POD63	0	0	0	0	0	0	0	FALSE	0	0	0	FALSE	0	0
HuPOD25	POD25	0	0	0	0	0	0	0	FALSE	0	0	0	FALSE	0	0
HuCSD3	CSD3	1	0	1	0.321429	1	8	0	FALSE	5.5	8	0	FALSE	0	0
HuMSD1	MSD1	1	0.0729167	1	0.321429	1	8	4	FALSE	5.5	4	0	FALSE	0	6
HuCSD1	CSD1	1	0.0193452	1	0.321429	1	8	7	FALSE	5.5	1	0	FALSE	0	3
HuAPX3	APX3	1.2	0	0.833333	0.45	2	5	1	FALSE	7	4	0	FALSE	0	0
HuSAPX	SAPX	1.4	0	0.714286	0.5	2	4	1	FALSE	7.5	3	0	FALSE	0	0
HuAPX1	APX1	0	0	0	0.45	0	5	5	FALSE	7	0	0	FALSE	0	0
HuGPX1	GPX1	1	0.0104167	1	0.4	1	6	4	FALSE	6.33333	2	0	FALSE	0	2
HuAPX6	APX6	1.6	0	0.625	0.5	2	3	1	FALSE	8	2	0	FALSE	0	0
HuGPX3	GPX3	1	0.00446429	1	0.45	1	5	3	FALSE	6.8	2	0	FALSE	0	1
HuPOD44	AT4G26010	1	0.5	1	0	1	2	1	FALSE	1	1	0	FALSE	0	1
HuPOD50	POD50	0	0	0	0	0	1	1	FALSE	2	0	0	FALSE	0	0
HuPOD57	AT5G17820	1.5	0	0.666667	0	2	1	0	FALSE	2	1	0	FALSE	0	0
HuPOD20	AT2G35380	1	0.0833333	1	0.416667	1	4	2	FALSE	3.5	2	0	FALSE	0	1
HuPOD11	AT1G68850	1	0	1	0.5	1	3	2	FALSE	4	1	0	FALSE	0	0
HuPOD72	AT5G66390	1	0	1	0.416667	1	4	0	FALSE	3.5	4	0	FALSE	0	0
HuRCI3	RCI3	0	0	0	0.416667	0	4	4	FALSE	3.5	0	0	FALSE	0	0
HuPOD5	POD5	1.33333	0	0.75	0.5	2	3	1	FALSE	4	2	0	FALSE	0	0
