# Supplementary material for: Transcriptomic analysis reveals key genes related to antioxidant mechanisms of Hylocereus undatus quality improvement by trypsin during storage
Source: Royal Society of Chemistry journal article supplement (doi:10.1039/c9fo00809h), 2019-01-01
Supplement: c9fo00809h7.xlsx [file c9fo00809h7.xlsx]

## Sheet: Table SPPI9 CAT
name	shared name	AverageShortestPathLength	BetweennessCentrality	ClosenessCentrality	ClusteringCoefficient	Eccentricity	EdgeCount	Indegree	IsSingleNode	NeighborhoodConnectivity	Outdegree	PartnerOfMultiEdgedNodePairs	selected	SelfLoops	Stress
HuCAT	CAT	1.05882	0.00098684	0.944444	0.353801	2	19	3	FALSE	13.9474	16	0	TRUE	0	2
HuFSD3	FSD3	1.05263	0	0.95	0.353801	2	19	1	FALSE	13.9474	18	0	TRUE	0	0
HuFSD2	FSD2	1.05	0	0.952381	0.353801	2	19	0	FALSE	13.9474	19	0	TRUE	0	0
HuMSD1	MSD1	1.09091	0.0264985	0.916667	0.359477	2	18	8	FALSE	14.1111	10	0	TRUE	0	23
HuCSD3	CSD3	1.11111	0.00175439	0.9	0.333333	2	18	2	FALSE	13.6111	16	0	TRUE	0	2
HuCSD1	CSD1	1	0.00673977	1	0.333333	1	18	17	FALSE	13.6111	1	0	TRUE	0	7
HuCSD2	CSD2	1.125	0.0499415	0.888889	0.333333	2	18	11	FALSE	13.6111	7	0	TRUE	0	35
HuCAT1	CAT1	1	0.00345029	1	0.391667	1	16	14	FALSE	14.6875	2	0	TRUE	0	5
HuGPX1	GPX1	1.16667	0.00720029	0.857143	0.412088	2	14	9	FALSE	15.5714	5	0	TRUE	0	10
HuTRX	AT1G21350	1.33333	0.0198977	0.75	0.307692	2	13	11	FALSE	13.3846	2	0	TRUE	0	15
HuGPX6	GPX6	1.42857	0.00391082	0.7	0.416667	2	13	5	FALSE	15.9231	8	0	TRUE	0	4
HuAPX3	APX3	1.4	0.00098684	0.714286	0.416667	2	13	4	FALSE	16.0769	9	0	TRUE	0	2
HuAPX1	APX1	0	0	0	0.416667	0	13	13	FALSE	16.0769	0	0	TRUE	0	0
HuGPX3	GPX3	1.66667	0.00476608	0.6	0.439394	3	12	8	FALSE	16.1667	4	0	TRUE	0	6
HuPRXQ	PRXQ	1.54545	0.011038	0.647059	0.348485	3	12	6	FALSE	14	6	0	TRUE	0	12
HuAPX2	APX2	1.5	0.00427632	0.666667	0.409091	2	11	6	FALSE	16.5455	5	0	TRUE	0	5
HuSAPX	SAPX	1.53846	0.00131579	0.65	0.445455	2	11	5	FALSE	16.7273	6	0	TRUE	0	2
HuTAPX	TAPX	1.4	0.00427632	0.714286	0.418182	2	11	8	FALSE	16.7273	3	0	TRUE	0	5
HuGPX8	GPX8	1.33333	0	0.75	0.5	2	8	6	FALSE	18.125	2	0	TRUE	0	0
HuAPX6	APX6	1.66667	0.00032895	0.6	0.446429	2	8	4	FALSE	17.75	4	0	TRUE	0	1
