# Supplementary material for: Transcriptomic analysis reveals key genes related to antioxidant mechanisms of Hylocereus undatus quality improvement by trypsin during storage
Source: Royal Society of Chemistry journal article supplement (doi:10.1039/c9fo00809h), 2019-01-01
Supplement: c9fo00809h8.xlsx [file c9fo00809h8.xlsx]

## Sheet: COG注释统计表
Type	Functional Categories	COG	NOG
INFORMATION STORAGE AND PROCESSING	[A] RNA processing and modification	21	34
INFORMATION STORAGE AND PROCESSING	[B] Chromatin structure and dynamics	35	5
METABOLISM	[C] Energy production and conversion	203	12
CELLULAR PROCESSES AND SIGNALING	[D] Cell cycle control, cell division, chromosome partitioning	62	6
METABOLISM	[E] Amino acid transport and metabolism	217	7
METABOLISM	[F] Nucleotide transport and metabolism	74	4
METABOLISM	[G] Carbohydrate transport and metabolism	211	89
METABOLISM	[H] Coenzyme transport and metabolism	105	5
METABOLISM	[I] Lipid transport and metabolism	145	70
INFORMATION STORAGE AND PROCESSING	[J] Translation, ribosomal structure and biogenesis	320	38
INFORMATION STORAGE AND PROCESSING	[K] Transcription	103	72
INFORMATION STORAGE AND PROCESSING	[L] Replication, recombination and repair	159	35
CELLULAR PROCESSES AND SIGNALING	[M] Cell wall/membrane/envelope biogenesis	109	4
CELLULAR PROCESSES AND SIGNALING	[N] Cell motility	3	0
CELLULAR PROCESSES AND SIGNALING	[O] Posttranslational modification, protein turnover, chaperones	343	200
METABOLISM	[P] Inorganic ion transport and metabolism	113	11
METABOLISM	[Q] Secondary metabolites biosynthesis, transport and catabolism	82	3
POORLY CHARACTERIZED	[R] General function prediction only	335	494
POORLY CHARACTERIZED	[S] Function unknown	120	1295
CELLULAR PROCESSES AND SIGNALING	[T] Signal transduction mechanisms	214	116
CELLULAR PROCESSES AND SIGNALING	[U] Intracellular trafficking, secretion, and vesicular transport	105	243
CELLULAR PROCESSES AND SIGNALING	[V] Defense mechanisms	36	0
CELLULAR PROCESSES AND SIGNALING	[Y] Nuclear structure	3	0
CELLULAR PROCESSES AND SIGNALING	[Z] Cytoskeleton	73	6
