# Supplementary material for: Transcriptomic analysis reveals key genes related to antioxidant mechanisms of Hylocereus undatus quality improvement by trypsin during storage
Source: Royal Society of Chemistry journal article supplement (doi:10.1039/c9fo00809h), 2019-01-01
Supplement: c9fo00809h9.xlsx [file c9fo00809h9.xlsx]

## Sheet: Classified Pathway
First Category	Second Category	num（seq_list）
Metabolism	Nucleotide metabolism	287
Metabolism	Biosynthesis of other secondary metabolites	250
Metabolism	Glycan biosynthesis and metabolism	165
Metabolism	Metabolism of terpenoids and polyketides	198
Metabolism	Lipid metabolism	513
Metabolism	Energy metabolism	455
Metabolism	Metabolism of other amino acids	210
Metabolism	Metabolism of cofactors and vitamins	313
Metabolism	Amino acid metabolism	576
Metabolism	Carbohydrate metabolism	969
Genetic Information Processing	Transcription	369
Genetic Information Processing	Translation	1008
Genetic Information Processing	Replication and repair	254
Genetic Information Processing	Folding, sorting and degradation	824
Environmental Information Processing	Signal transduction	436
Environmental Information Processing	Membrane transport	90
Cellular Processes	Transport and catabolism	525
Organismal Systems	Environmental adaptation	254
Human Diseases	Drug resistance: Antimicrobial	2
Human Diseases	Endocrine and metabolic diseases	54
