# Supplementary material for: Transcriptomic analysis reveals key genes related to antioxidant mechanisms of Hylocereus undatus quality improvement by trypsin during storage
Source: Royal Society of Chemistry journal article supplement (doi:10.1039/c9fo00809h), 2019-01-01
Supplement: c9fo00809h10.xlsx [file c9fo00809h10.xlsx]

## Sheet: 表达量差异统计表
Gene_id	C_vs_E	Sum
86808	17206	17206
TRINITY_DN51950_c2_g5	yes	1
TRINITY_DN4110_c0_g1	yes	1
TRINITY_DN3901_c0_g1	yes	1
TRINITY_DN46361_c1_g1	yes	1
TRINITY_DN38355_c0_g1	yes	1
TRINITY_DN51950_c2_g3	yes	1
TRINITY_DN45764_c1_g1	yes	1
TRINITY_DN38632_c0_g1	yes	1
TRINITY_DN61063_c0_g1	yes	1
TRINITY_DN30064_c0_g1	yes	1
TRINITY_DN49221_c2_g1	yes	1
TRINITY_DN27609_c0_g1	yes	1
TRINITY_DN47926_c3_g5	yes	1
TRINITY_DN5291_c0_g1	yes	1
TRINITY_DN46166_c0_g1	yes	1
TRINITY_DN17367_c0_g1	yes	1
TRINITY_DN25290_c0_g1	yes	1
TRINITY_DN35341_c0_g1	yes	1
TRINITY_DN21966_c0_g1	yes	1
TRINITY_DN48523_c2_g1	yes	1
TRINITY_DN450_c0_g1	yes	1
TRINITY_DN35949_c0_g1	yes	1
TRINITY_DN34333_c0_g1	yes	1
TRINITY_DN57882_c0_g1	yes	1
TRINITY_DN42844_c0_g1	yes	1
TRINITY_DN36_c0_g1	yes	1
TRINITY_DN52183_c4_g1	yes	1
TRINITY_DN28853_c0_g1	yes	1
TRINITY_DN29965_c0_g1	yes	1
TRINITY_DN42577_c0_g1	yes	1
TRINITY_DN24368_c0_g1	yes	1
TRINITY_DN51988_c3_g5	yes	1
TRINITY_DN39316_c0_g1	yes	1
TRINITY_DN51436_c3_g2	yes	1
TRINITY_DN51436_c3_g1	yes	1
TRINITY_DN18857_c0_g2	yes	1
TRINITY_DN9298_c0_g1	yes	1
TRINITY_DN51921_c0_g5	yes	1
TRINITY_DN51457_c0_g2	yes	1
TRINITY_DN51921_c0_g3	yes	1
TRINITY_DN42309_c1_g1	yes	1
TRINITY_DN51878_c1_g1	yes	1
TRINITY_DN51779_c3_g2	yes	1
TRINITY_DN52574_c8_g1	yes	1
TRINITY_DN46568_c1_g2	yes	1
TRINITY_DN52120_c1_g1	yes	1
TRINITY_DN44338_c0_g1	yes	1
TRINITY_DN51998_c5_g1	yes	1
TRINITY_DN30461_c0_g1	yes	1
TRINITY_DN46384_c0_g1	yes	1
TRINITY_DN50415_c0_g1	yes	1
TRINITY_DN48180_c0_g1	yes	1
TRINITY_DN44696_c0_g1	yes	1
TRINITY_DN35817_c0_g1	yes	1
TRINITY_DN31375_c0_g1	yes	1
TRINITY_DN36232_c0_g1	yes	1
TRINITY_DN50000_c0_g1	yes	1
TRINITY_DN46082_c0_g1	yes	1
TRINITY_DN51117_c0_g2	yes	1
TRINITY_DN8547_c0_g1	yes	1
TRINITY_DN34840_c0_g1	yes	1
TRINITY_DN49793_c0_g1	yes	1
TRINITY_DN63826_c0_g1	yes	1
TRINITY_DN30821_c0_g1	yes	1
TRINITY_DN51980_c1_g3	yes	1
TRINITY_DN52064_c6_g1	yes	1
TRINITY_DN51388_c0_g1	yes	1
TRINITY_DN23008_c0_g1	yes	1
TRINITY_DN34342_c0_g1	yes	1
TRINITY_DN35676_c0_g1	yes	1
TRINITY_DN46803_c2_g1	yes	1
TRINITY_DN69673_c0_g1	yes	1
TRINITY_DN86948_c0_g1	yes	1
TRINITY_DN48051_c3_g1	yes	1
TRINITY_DN33511_c0_g1	yes	1
TRINITY_DN40367_c0_g1	yes	1
TRINITY_DN49716_c3_g1	yes	1
TRINITY_DN48776_c0_g2	yes	1
TRINITY_DN49842_c2_g1	yes	1
TRINITY_DN49108_c1_g1	yes	1
TRINITY_DN48776_c0_g1	yes	1
TRINITY_DN31441_c0_g1	yes	1
TRINITY_DN51476_c0_g1	yes	1
TRINITY_DN42819_c1_g1	yes	1
TRINITY_DN45844_c1_g1	yes	1
TRINITY_DN49764_c0_g1	yes	1
TRINITY_DN51515_c1_g1	yes	1
TRINITY_DN42141_c0_g1	yes	1
TRINITY_DN42362_c0_g1	yes	1
TRINITY_DN30691_c0_g1	yes	1
TRINITY_DN32338_c0_g1	yes	1
TRINITY_DN44801_c0_g1	yes	1
TRINITY_DN26646_c0_g1	yes	1
TRINITY_DN9709_c0_g1	yes	1
TRINITY_DN9337_c0_g1	yes	1
TRINITY_DN41050_c0_g1	yes	1
TRINITY_DN48523_c4_g4	yes	1
TRINITY_DN19723_c0_g1	yes	1
TRINITY_DN3336_c0_g1	yes	1
TRINITY_DN51960_c4_g1	yes	1
TRINITY_DN46629_c0_g4	yes	1
TRINITY_DN75938_c0_g1	yes	1
TRINITY_DN52569_c14_g1	yes	1
TRINITY_DN46154_c0_g1	yes	1
TRINITY_DN19712_c0_g1	yes	1
TRINITY_DN34377_c0_g1	yes	1
TRINITY_DN36597_c0_g1	yes	1
TRINITY_DN45688_c1_g1	yes	1
TRINITY_DN37755_c0_g1	yes	1
TRINITY_DN45688_c1_g3	yes	1
TRINITY_DN32748_c0_g2	yes	1
TRINITY_DN39047_c0_g1	yes	1
TRINITY_DN46247_c0_g2	yes	1
TRINITY_DN50711_c2_g1	yes	1
TRINITY_DN4078_c0_g1	yes	1
TRINITY_DN49623_c0_g3	yes	1
TRINITY_DN43889_c1_g1	yes	1
TRINITY_DN49623_c0_g1	yes	1
TRINITY_DN39377_c2_g1	yes	1
TRINITY_DN29893_c0_g1	yes	1
TRINITY_DN35723_c0_g1	yes	1
TRINITY_DN52404_c3_g3	yes	1
TRINITY_DN32053_c0_g1	yes	1
TRINITY_DN43533_c0_g1	yes	1
TRINITY_DN49719_c1_g1	yes	1
TRINITY_DN20710_c0_g1	yes	1
TRINITY_DN44229_c0_g3	yes	1
TRINITY_DN34309_c0_g1	yes	1
TRINITY_DN44198_c2_g1	yes	1
TRINITY_DN43053_c0_g1	yes	1
TRINITY_DN48992_c0_g1	yes	1
TRINITY_DN47231_c0_g1	yes	1
TRINITY_DN51997_c0_g4	yes	1
TRINITY_DN26931_c0_g1	yes	1
TRINITY_DN45891_c0_g2	yes	1
TRINITY_DN19752_c0_g1	yes	1
TRINITY_DN23345_c0_g1	yes	1
TRINITY_DN50953_c0_g1	yes	1
TRINITY_DN52425_c3_g1	yes	1
TRINITY_DN47423_c0_g2	yes	1
TRINITY_DN49920_c0_g1	yes	1
TRINITY_DN24071_c0_g1	yes	1
TRINITY_DN20866_c0_g1	yes	1
TRINITY_DN48881_c0_g3	yes	1
TRINITY_DN42665_c0_g1	yes	1
TRINITY_DN33165_c0_g1	yes	1
TRINITY_DN47902_c0_g1	yes	1
TRINITY_DN48611_c0_g1	yes	1
TRINITY_DN22108_c0_g1	yes	1
TRINITY_DN52070_c0_g1	yes	1
TRINITY_DN46680_c0_g1	yes	1
TRINITY_DN41216_c0_g1	yes	1
TRINITY_DN97732_c0_g1	yes	1
TRINITY_DN43950_c0_g1	yes	1
TRINITY_DN26288_c0_g1	yes	1
TRINITY_DN27664_c0_g1	yes	1
TRINITY_DN39333_c0_g1	yes	1
TRINITY_DN49280_c1_g1	yes	1
TRINITY_DN45808_c1_g1	yes	1
TRINITY_DN46830_c0_g1	yes	1
TRINITY_DN14226_c0_g1	yes	1
TRINITY_DN50368_c0_g1	yes	1
TRINITY_DN48296_c0_g1	yes	1
TRINITY_DN85440_c0_g1	yes	1
TRINITY_DN23565_c0_g1	yes	1
TRINITY_DN88461_c0_g1	yes	1
TRINITY_DN35885_c0_g1	yes	1
TRINITY_DN52142_c4_g1	yes	1
TRINITY_DN39106_c0_g1	yes	1
TRINITY_DN40683_c0_g1	yes	1
TRINITY_DN1530_c0_g1	yes	1
TRINITY_DN47873_c0_g1	yes	1
TRINITY_DN42911_c0_g1	yes	1
TRINITY_DN43250_c0_g1	yes	1
TRINITY_DN26097_c0_g1	yes	1
TRINITY_DN49280_c0_g1	yes	1
TRINITY_DN33086_c0_g1	yes	1
TRINITY_DN76536_c0_g1	yes	1
TRINITY_DN51690_c0_g4	yes	1
TRINITY_DN22133_c0_g1	yes	1
TRINITY_DN47105_c0_g1	yes	1
TRINITY_DN38383_c0_g1	yes	1
TRINITY_DN68948_c0_g1	yes	1
TRINITY_DN46413_c0_g1	yes	1
TRINITY_DN50855_c0_g2	yes	1
TRINITY_DN20735_c0_g1	yes	1
TRINITY_DN41936_c0_g1	yes	1
TRINITY_DN39640_c0_g1	yes	1
TRINITY_DN85832_c0_g1	yes	1
TRINITY_DN49997_c0_g1	yes	1
TRINITY_DN66921_c0_g1	yes	1
TRINITY_DN62539_c0_g1	yes	1
TRINITY_DN25504_c0_g1	yes	1
TRINITY_DN45901_c1_g1	yes	1
TRINITY_DN49486_c1_g1	yes	1
TRINITY_DN38543_c0_g1	yes	1
TRINITY_DN52532_c2_g1	yes	1
TRINITY_DN50774_c0_g1	yes	1
TRINITY_DN39895_c0_g1	yes	1
TRINITY_DN51200_c0_g1	yes	1
TRINITY_DN18656_c0_g1	yes	1
TRINITY_DN40810_c0_g1	yes	1
TRINITY_DN44305_c0_g1	yes	1
TRINITY_DN24733_c0_g1	yes	1
TRINITY_DN20907_c0_g1	yes	1
TRINITY_DN34922_c0_g1	yes	1
TRINITY_DN44442_c0_g2	yes	1
TRINITY_DN5267_c0_g1	yes	1
TRINITY_DN50864_c3_g1	yes	1
TRINITY_DN23119_c0_g1	yes	1
TRINITY_DN52727_c0_g1	yes	1
TRINITY_DN44349_c0_g1	yes	1
TRINITY_DN47374_c0_g4	yes	1
TRINITY_DN94823_c0_g1	yes	1
TRINITY_DN19188_c0_g1	yes	1
TRINITY_DN46778_c0_g1	yes	1
TRINITY_DN22224_c0_g1	yes	1
TRINITY_DN31051_c0_g2	yes	1
TRINITY_DN47171_c1_g2	yes	1
TRINITY_DN42355_c0_g1	yes	1
TRINITY_DN27951_c0_g1	yes	1
TRINITY_DN263_c0_g1	yes	1
TRINITY_DN37221_c0_g1	yes	1
TRINITY_DN45002_c1_g1	yes	1
TRINITY_DN48292_c3_g1	yes	1
TRINITY_DN47917_c0_g2	yes	1
TRINITY_DN88741_c0_g1	yes	1
TRINITY_DN17540_c0_g1	yes	1
TRINITY_DN48074_c1_g1	yes	1
TRINITY_DN52475_c1_g1	yes	1
TRINITY_DN31315_c0_g1	yes	1
TRINITY_DN89562_c0_g1	yes	1
TRINITY_DN45846_c0_g2	yes	1
TRINITY_DN51432_c4_g6	yes	1
TRINITY_DN47326_c0_g1	yes	1
TRINITY_DN48300_c0_g1	yes	1
TRINITY_DN6694_c0_g1	yes	1
TRINITY_DN52574_c4_g1	yes	1
TRINITY_DN1640_c0_g1	yes	1
TRINITY_DN43240_c0_g1	yes	1
TRINITY_DN43240_c0_g3	yes	1
TRINITY_DN49353_c0_g1	yes	1
TRINITY_DN45508_c0_g1	yes	1
TRINITY_DN2699_c0_g1	yes	1
TRINITY_DN26010_c1_g1	yes	1
TRINITY_DN24278_c0_g1	yes	1
TRINITY_DN27_c0_g1	yes	1
TRINITY_DN39409_c0_g1	yes	1
TRINITY_DN47962_c0_g1	yes	1
TRINITY_DN42111_c0_g1	yes	1
TRINITY_DN41360_c0_g1	yes	1
TRINITY_DN984_c0_g1	yes	1
TRINITY_DN44831_c0_g2	yes	1
TRINITY_DN51026_c1_g1	yes	1
TRINITY_DN6785_c0_g1	yes	1
TRINITY_DN45310_c0_g1	yes	1
TRINITY_DN13067_c0_g1	yes	1
TRINITY_DN58704_c0_g1	yes	1
TRINITY_DN40793_c0_g1	yes	1
TRINITY_DN45633_c0_g1	yes	1
TRINITY_DN48292_c2_g1	yes	1
TRINITY_DN23185_c0_g1	yes	1
TRINITY_DN78987_c0_g1	yes	1
TRINITY_DN49114_c0_g1	yes	1
TRINITY_DN52111_c2_g1	yes	1
TRINITY_DN51528_c2_g1	yes	1
TRINITY_DN52508_c1_g2	yes	1
TRINITY_DN46164_c0_g1	yes	1
TRINITY_DN39847_c0_g1	yes	1
TRINITY_DN23960_c0_g1	yes	1
TRINITY_DN27367_c0_g1	yes	1
TRINITY_DN37901_c0_g1	yes	1
TRINITY_DN47832_c0_g1	yes	1
TRINITY_DN39196_c0_g1	yes	1
TRINITY_DN50314_c4_g1	yes	1
TRINITY_DN28755_c0_g1	yes	1
TRINITY_DN42257_c0_g1	yes	1
TRINITY_DN42306_c0_g1	yes	1
TRINITY_DN43073_c0_g1	yes	1
TRINITY_DN36254_c0_g1	yes	1
TRINITY_DN24780_c0_g1	yes	1
TRINITY_DN31191_c0_g1	yes	1
TRINITY_DN48379_c1_g1	yes	1
TRINITY_DN49027_c1_g1	yes	1
TRINITY_DN52518_c6_g1	yes	1
TRINITY_DN51374_c0_g1	yes	1
TRINITY_DN19514_c0_g1	yes	1
TRINITY_DN43605_c0_g1	yes	1
TRINITY_DN37894_c0_g1	yes	1
TRINITY_DN46289_c0_g1	yes	1
TRINITY_DN22016_c0_g1	yes	1
TRINITY_DN50392_c1_g1	yes	1
TRINITY_DN39027_c2_g2	yes	1
TRINITY_DN19308_c0_g1	yes	1
TRINITY_DN27639_c0_g2	yes	1
TRINITY_DN27639_c0_g1	yes	1
TRINITY_DN39912_c0_g1	yes	1
TRINITY_DN33337_c0_g1	yes	1
TRINITY_DN44319_c0_g2	yes	1
TRINITY_DN39905_c0_g1	yes	1
TRINITY_DN49669_c5_g2	yes	1
TRINITY_DN49326_c0_g1	yes	1
TRINITY_DN50801_c1_g1	yes	1
TRINITY_DN23424_c0_g1	yes	1
TRINITY_DN40532_c0_g1	yes	1
TRINITY_DN47067_c2_g1	yes	1
TRINITY_DN45845_c1_g1	yes	1
TRINITY_DN30247_c0_g1	yes	1
TRINITY_DN50379_c0_g1	yes	1
TRINITY_DN33640_c0_g1	yes	1
TRINITY_DN49411_c2_g1	yes	1
TRINITY_DN21016_c0_g1	yes	1
TRINITY_DN45650_c2_g1	yes	1
TRINITY_DN86014_c0_g1	yes	1
TRINITY_DN48486_c1_g2	yes	1
TRINITY_DN24923_c0_g1	yes	1
TRINITY_DN47297_c0_g1	yes	1
TRINITY_DN51306_c1_g1	yes	1
TRINITY_DN51117_c0_g1	yes	1
TRINITY_DN60170_c0_g1	yes	1
TRINITY_DN49569_c2_g2	yes	1
TRINITY_DN15144_c0_g1	yes	1
TRINITY_DN4783_c0_g1	yes	1
TRINITY_DN36514_c0_g1	yes	1
TRINITY_DN34113_c0_g1	yes	1
TRINITY_DN34455_c0_g1	yes	1
TRINITY_DN6594_c0_g2	yes	1
TRINITY_DN30239_c0_g1	yes	1
TRINITY_DN48104_c0_g1	yes	1
TRINITY_DN41320_c0_g1	yes	1
TRINITY_DN38429_c0_g1	yes	1
TRINITY_DN4251_c0_g1	yes	1
TRINITY_DN29835_c0_g2	yes	1
TRINITY_DN41503_c0_g1	yes	1
TRINITY_DN50601_c0_g1	yes	1
TRINITY_DN52272_c0_g1	yes	1
TRINITY_DN42437_c0_g1	yes	1
TRINITY_DN50601_c0_g2	yes	1
TRINITY_DN8868_c0_g1	yes	1
TRINITY_DN95224_c0_g1	yes	1
TRINITY_DN27806_c0_g2	yes	1
TRINITY_DN33588_c0_g1	yes	1
TRINITY_DN21838_c0_g1	yes	1
TRINITY_DN38149_c0_g1	yes	1
TRINITY_DN47262_c0_g1	yes	1
TRINITY_DN47262_c0_g2	yes	1
TRINITY_DN48550_c0_g1	yes	1
TRINITY_DN34946_c0_g1	yes	1
TRINITY_DN48882_c0_g3	yes	1
TRINITY_DN48882_c0_g2	yes	1
TRINITY_DN33146_c0_g1	yes	1
TRINITY_DN15224_c0_g1	yes	1
TRINITY_DN21842_c0_g1	yes	1
TRINITY_DN39475_c0_g1	yes	1
TRINITY_DN44895_c0_g1	yes	1
TRINITY_DN42489_c0_g1	yes	1
TRINITY_DN41011_c3_g1	yes	1
TRINITY_DN38129_c0_g1	yes	1
TRINITY_DN42194_c0_g1	yes	1
TRINITY_DN9498_c0_g1	yes	1
TRINITY_DN48654_c0_g1	yes	1
TRINITY_DN33157_c0_g1	yes	1
TRINITY_DN35037_c0_g1	yes	1
TRINITY_DN48304_c0_g1	yes	1
TRINITY_DN46173_c0_g1	yes	1
TRINITY_DN24712_c1_g1	yes	1
TRINITY_DN51705_c0_g1	yes	1
TRINITY_DN51358_c0_g1	yes	1
TRINITY_DN44761_c0_g1	yes	1
TRINITY_DN35248_c1_g1	yes	1
TRINITY_DN28368_c0_g1	yes	1
TRINITY_DN50210_c0_g1	yes	1
TRINITY_DN42823_c0_g1	yes	1
TRINITY_DN13942_c0_g1	yes	1
TRINITY_DN28863_c0_g2	yes	1
TRINITY_DN51542_c0_g2	yes	1
TRINITY_DN11539_c0_g1	yes	1
TRINITY_DN51234_c0_g1	yes	1
TRINITY_DN4128_c0_g1	yes	1
TRINITY_DN48191_c2_g3	yes	1
TRINITY_DN42973_c0_g1	yes	1
TRINITY_DN69458_c0_g1	yes	1
TRINITY_DN41134_c0_g1	yes	1
TRINITY_DN46652_c0_g3	yes	1
TRINITY_DN38199_c0_g1	yes	1
TRINITY_DN32178_c0_g1	yes	1
TRINITY_DN49569_c1_g1	yes	1
TRINITY_DN50626_c8_g1	yes	1
TRINITY_DN68702_c0_g1	yes	1
TRINITY_DN23566_c0_g1	yes	1
TRINITY_DN39776_c0_g1	yes	1
TRINITY_DN43977_c2_g1	yes	1
TRINITY_DN49174_c0_g1	yes	1
TRINITY_DN49174_c0_g2	yes	1
TRINITY_DN51292_c0_g1	yes	1
TRINITY_DN36707_c0_g2	yes	1
TRINITY_DN17627_c0_g1	yes	1
TRINITY_DN36834_c0_g1	yes	1
TRINITY_DN10036_c0_g1	yes	1
TRINITY_DN32345_c0_g1	yes	1
TRINITY_DN49026_c2_g3	yes	1
TRINITY_DN52039_c2_g3	yes	1
TRINITY_DN40015_c0_g1	yes	1
TRINITY_DN98467_c0_g1	yes	1
TRINITY_DN60313_c0_g1	yes	1
TRINITY_DN49733_c0_g1	yes	1
TRINITY_DN41035_c0_g1	yes	1
TRINITY_DN49733_c0_g3	yes	1
TRINITY_DN44625_c0_g1	yes	1
TRINITY_DN41878_c0_g1	yes	1
TRINITY_DN38259_c0_g1	yes	1
TRINITY_DN51744_c0_g2	yes	1
TRINITY_DN42584_c0_g1	yes	1
TRINITY_DN23675_c0_g1	yes	1
TRINITY_DN30539_c0_g1	yes	1
TRINITY_DN42522_c0_g1	yes	1
TRINITY_DN47002_c3_g1	yes	1
TRINITY_DN14207_c0_g1	yes	1
TRINITY_DN42887_c0_g1	yes	1
TRINITY_DN40927_c1_g1	yes	1
TRINITY_DN13787_c0_g1	yes	1
TRINITY_DN38711_c0_g1	yes	1
TRINITY_DN43023_c0_g1	yes	1
TRINITY_DN52273_c2_g1	yes	1
TRINITY_DN62600_c0_g1	yes	1
TRINITY_DN50954_c0_g1	yes	1
TRINITY_DN42484_c0_g1	yes	1
TRINITY_DN38965_c0_g1	yes	1
TRINITY_DN36108_c1_g1	yes	1
TRINITY_DN29427_c0_g1	yes	1
TRINITY_DN86511_c0_g1	yes	1
TRINITY_DN28291_c0_g1	yes	1
TRINITY_DN41991_c1_g1	yes	1
TRINITY_DN32904_c0_g1	yes	1
TRINITY_DN48518_c0_g1	yes	1
TRINITY_DN37210_c0_g1	yes	1
TRINITY_DN16446_c0_g1	yes	1
TRINITY_DN51083_c1_g1	yes	1
TRINITY_DN5210_c0_g1	yes	1
TRINITY_DN30037_c0_g1	yes	1
TRINITY_DN49710_c0_g1	yes	1
TRINITY_DN35528_c0_g1	yes	1
TRINITY_DN45810_c0_g1	yes	1
TRINITY_DN38132_c0_g1	yes	1
TRINITY_DN35200_c0_g1	yes	1
TRINITY_DN44929_c0_g1	yes	1
TRINITY_DN52473_c1_g1	yes	1
TRINITY_DN49284_c0_g1	yes	1
TRINITY_DN50354_c2_g1	yes	1
TRINITY_DN37718_c0_g2	yes	1
TRINITY_DN52223_c0_g1	yes	1
TRINITY_DN33478_c0_g1	yes	1
TRINITY_DN45797_c0_g1	yes	1
TRINITY_DN37313_c0_g1	yes	1
TRINITY_DN37864_c1_g1	yes	1
TRINITY_DN32940_c0_g1	yes	1
TRINITY_DN34521_c0_g1	yes	1
TRINITY_DN46530_c0_g1	yes	1
TRINITY_DN44437_c0_g1	yes	1
TRINITY_DN31026_c0_g1	yes	1
TRINITY_DN50476_c1_g1	yes	1
TRINITY_DN41220_c0_g1	yes	1
TRINITY_DN35782_c0_g2	yes	1
TRINITY_DN51002_c0_g1	yes	1
TRINITY_DN45833_c1_g2	yes	1
TRINITY_DN47768_c0_g1	yes	1
TRINITY_DN28718_c0_g1	yes	1
TRINITY_DN42442_c0_g3	yes	1
TRINITY_DN34029_c0_g1	yes	1
TRINITY_DN42442_c0_g1	yes	1
TRINITY_DN49033_c2_g1	yes	1
TRINITY_DN48834_c0_g1	yes	1
TRINITY_DN48807_c0_g1	yes	1
TRINITY_DN3023_c0_g1	yes	1
TRINITY_DN43578_c1_g1	yes	1
TRINITY_DN52562_c4_g2	yes	1
TRINITY_DN38458_c0_g1	yes	1
TRINITY_DN35331_c0_g1	yes	1
TRINITY_DN51627_c0_g1	yes	1
TRINITY_DN40296_c0_g1	yes	1
TRINITY_DN23418_c0_g1	yes	1
TRINITY_DN39405_c0_g1	yes	1
TRINITY_DN52515_c6_g2	yes	1
TRINITY_DN34407_c0_g1	yes	1
TRINITY_DN37917_c0_g1	yes	1
TRINITY_DN50977_c0_g1	yes	1
TRINITY_DN43313_c0_g1	yes	1
TRINITY_DN47904_c0_g1	yes	1
TRINITY_DN72174_c0_g1	yes	1
TRINITY_DN19110_c0_g1	yes	1
TRINITY_DN58794_c0_g1	yes	1
TRINITY_DN47527_c0_g2	yes	1
TRINITY_DN46867_c0_g1	yes	1
TRINITY_DN36547_c0_g2	yes	1
TRINITY_DN57838_c0_g1	yes	1
TRINITY_DN77895_c0_g1	yes	1
TRINITY_DN29717_c0_g1	yes	1
TRINITY_DN85480_c0_g1	yes	1
TRINITY_DN51468_c1_g1	yes	1
TRINITY_DN4996_c0_g1	yes	1
TRINITY_DN46760_c1_g1	yes	1
TRINITY_DN42220_c0_g1	yes	1
TRINITY_DN16732_c0_g1	yes	1
TRINITY_DN15573_c0_g1	yes	1
TRINITY_DN51163_c0_g1	yes	1
TRINITY_DN47975_c0_g1	yes	1
TRINITY_DN51060_c10_g1	yes	1
TRINITY_DN50262_c1_g1	yes	1
TRINITY_DN43168_c0_g1	yes	1
TRINITY_DN59755_c0_g1	yes	1
TRINITY_DN49408_c0_g1	yes	1
TRINITY_DN45086_c0_g2	yes	1
TRINITY_DN35819_c0_g2	yes	1
TRINITY_DN58964_c0_g1	yes	1
TRINITY_DN33305_c0_g1	yes	1
TRINITY_DN45787_c0_g1	yes	1
TRINITY_DN52141_c1_g1	yes	1
TRINITY_DN27159_c0_g1	yes	1
TRINITY_DN26459_c0_g1	yes	1
TRINITY_DN50451_c0_g1	yes	1
TRINITY_DN51925_c4_g1	yes	1
TRINITY_DN39898_c0_g1	yes	1
TRINITY_DN40716_c0_g1	yes	1
TRINITY_DN33827_c0_g1	yes	1
TRINITY_DN28388_c0_g1	yes	1
TRINITY_DN47611_c1_g1	yes	1
TRINITY_DN47356_c9_g1	yes	1
TRINITY_DN51952_c0_g1	yes	1
TRINITY_DN52054_c1_g1	yes	1
TRINITY_DN13362_c0_g1	yes	1
TRINITY_DN51130_c0_g1	yes	1
TRINITY_DN51425_c1_g1	yes	1
TRINITY_DN6112_c0_g1	yes	1
TRINITY_DN2127_c0_g1	yes	1
TRINITY_DN50712_c2_g1	yes	1
TRINITY_DN44146_c0_g1	yes	1
TRINITY_DN49063_c3_g1	yes	1
TRINITY_DN52538_c7_g2	yes	1
TRINITY_DN85276_c0_g1	yes	1
TRINITY_DN45847_c0_g1	yes	1
TRINITY_DN25080_c0_g1	yes	1
TRINITY_DN24109_c0_g1	yes	1
TRINITY_DN51514_c1_g1	yes	1
TRINITY_DN44619_c0_g1	yes	1
TRINITY_DN36010_c0_g2	yes	1
TRINITY_DN25814_c0_g1	yes	1
TRINITY_DN50527_c0_g1	yes	1
TRINITY_DN44680_c0_g1	yes	1
TRINITY_DN39553_c0_g1	yes	1
TRINITY_DN32230_c0_g1	yes	1
TRINITY_DN43067_c0_g1	yes	1
TRINITY_DN48420_c0_g1	yes	1
TRINITY_DN25801_c0_g1	yes	1
TRINITY_DN48420_c0_g2	yes	1
TRINITY_DN15084_c0_g1	yes	1
TRINITY_DN43377_c0_g1	yes	1
TRINITY_DN50949_c0_g1	yes	1
TRINITY_DN43964_c0_g1	yes	1
TRINITY_DN48793_c0_g1	yes	1
TRINITY_DN19912_c0_g1	yes	1
TRINITY_DN100669_c0_g1	yes	1
TRINITY_DN50534_c4_g1	yes	1
TRINITY_DN51530_c0_g1	yes	1
TRINITY_DN85235_c0_g1	yes	1
TRINITY_DN52438_c3_g4	yes	1
TRINITY_DN47854_c1_g1	yes	1
TRINITY_DN32190_c0_g1	yes	1
TRINITY_DN50775_c1_g1	yes	1
TRINITY_DN50470_c1_g1	yes	1
TRINITY_DN63150_c0_g1	yes	1
TRINITY_DN52196_c1_g4	yes	1
TRINITY_DN52196_c1_g3	yes	1
TRINITY_DN46214_c0_g1	yes	1
TRINITY_DN52196_c1_g1	yes	1
TRINITY_DN49406_c4_g1	yes	1
TRINITY_DN43914_c0_g1	yes	1
TRINITY_DN31084_c0_g1	yes	1
TRINITY_DN41851_c0_g1	yes	1
TRINITY_DN47533_c0_g1	yes	1
TRINITY_DN15364_c0_g1	yes	1
TRINITY_DN45705_c0_g1	yes	1
TRINITY_DN52033_c0_g3	yes	1
TRINITY_DN47809_c0_g1	yes	1
TRINITY_DN45363_c0_g1	yes	1
TRINITY_DN33259_c0_g1	yes	1
TRINITY_DN52110_c0_g2	yes	1
TRINITY_DN51032_c0_g1	yes	1
TRINITY_DN49084_c5_g4	yes	1
TRINITY_DN46158_c0_g1	yes	1
TRINITY_DN28263_c0_g1	yes	1
TRINITY_DN51625_c1_g1	yes	1
TRINITY_DN50772_c0_g1	yes	1
TRINITY_DN42132_c0_g1	yes	1
TRINITY_DN39689_c0_g1	yes	1
TRINITY_DN46489_c0_g2	yes	1
TRINITY_DN52392_c2_g1	yes	1
TRINITY_DN52392_c2_g2	yes	1
TRINITY_DN1700_c0_g1	yes	1
TRINITY_DN7895_c0_g1	yes	1
TRINITY_DN40953_c0_g1	yes	1
TRINITY_DN22420_c0_g1	yes	1
TRINITY_DN50532_c0_g1	yes	1
TRINITY_DN50532_c0_g2	yes	1
TRINITY_DN24171_c0_g1	yes	1
TRINITY_DN45167_c0_g1	yes	1
TRINITY_DN40995_c0_g2	yes	1
TRINITY_DN42106_c0_g1	yes	1
TRINITY_DN51174_c0_g1	yes	1
TRINITY_DN48069_c0_g2	yes	1
TRINITY_DN44467_c0_g1	yes	1
TRINITY_DN47179_c2_g1	yes	1
TRINITY_DN45916_c0_g1	yes	1
TRINITY_DN45420_c0_g1	yes	1
TRINITY_DN45393_c0_g1	yes	1
TRINITY_DN22984_c0_g1	yes	1
TRINITY_DN45524_c1_g2	yes	1
TRINITY_DN45524_c1_g3	yes	1
TRINITY_DN46524_c0_g1	yes	1
TRINITY_DN36968_c0_g1	yes	1
TRINITY_DN52222_c0_g1	yes	1
TRINITY_DN29637_c0_g1	yes	1
TRINITY_DN37769_c0_g1	yes	1
TRINITY_DN51223_c0_g1	yes	1
TRINITY_DN37005_c0_g1	yes	1
TRINITY_DN84884_c0_g1	yes	1
TRINITY_DN96036_c0_g1	yes	1
TRINITY_DN9859_c0_g1	yes	1
TRINITY_DN52093_c0_g1	yes	1
TRINITY_DN49608_c1_g1	yes	1
TRINITY_DN34895_c0_g1	yes	1
TRINITY_DN3729_c0_g1	yes	1
TRINITY_DN46978_c0_g2	yes	1
TRINITY_DN38618_c0_g1	yes	1
TRINITY_DN51583_c1_g1	yes	1
TRINITY_DN7151_c0_g1	yes	1
TRINITY_DN40478_c0_g1	yes	1
TRINITY_DN77095_c0_g1	yes	1
TRINITY_DN37407_c0_g1	yes	1
TRINITY_DN52354_c0_g4	yes	1
TRINITY_DN35798_c0_g1	yes	1
TRINITY_DN42890_c0_g1	yes	1
TRINITY_DN45378_c0_g1	yes	1
TRINITY_DN101962_c0_g1	yes	1
TRINITY_DN58952_c0_g1	yes	1
TRINITY_DN48895_c0_g1	yes	1
TRINITY_DN67461_c0_g1	yes	1
TRINITY_DN27019_c0_g1	yes	1
TRINITY_DN48419_c0_g1	yes	1
TRINITY_DN46629_c0_g1	yes	1
TRINITY_DN26432_c0_g1	yes	1
TRINITY_DN77010_c0_g1	yes	1
TRINITY_DN26744_c0_g1	yes	1
TRINITY_DN76242_c0_g1	yes	1
TRINITY_DN32028_c0_g1	yes	1
TRINITY_DN27026_c0_g1	yes	1
TRINITY_DN11442_c0_g1	yes	1
TRINITY_DN41771_c0_g1	yes	1
TRINITY_DN51053_c5_g1	yes	1
TRINITY_DN46362_c0_g2	yes	1
TRINITY_DN45829_c2_g1	yes	1
TRINITY_DN39162_c0_g1	yes	1
TRINITY_DN50452_c0_g2	yes	1
TRINITY_DN51471_c2_g2	yes	1
TRINITY_DN14998_c0_g1	yes	1
TRINITY_DN49554_c0_g1	yes	1
TRINITY_DN50914_c3_g2	yes	1
TRINITY_DN45756_c0_g1	yes	1
TRINITY_DN23506_c0_g1	yes	1
TRINITY_DN50890_c0_g2	yes	1
TRINITY_DN38093_c0_g1	yes	1
TRINITY_DN42520_c0_g1	yes	1
TRINITY_DN7532_c0_g1	yes	1
TRINITY_DN43446_c0_g1	yes	1
TRINITY_DN44668_c0_g1	yes	1
TRINITY_DN45102_c0_g1	yes	1
TRINITY_DN44547_c0_g1	yes	1
TRINITY_DN32881_c0_g1	yes	1
TRINITY_DN52054_c1_g3	yes	1
TRINITY_DN44942_c0_g1	yes	1
TRINITY_DN40637_c0_g1	yes	1
TRINITY_DN49864_c1_g1	yes	1
TRINITY_DN51782_c1_g3	yes	1
TRINITY_DN51782_c1_g2	yes	1
TRINITY_DN51782_c1_g1	yes	1
TRINITY_DN49681_c1_g1	yes	1
TRINITY_DN82042_c0_g1	yes	1
TRINITY_DN37545_c0_g1	yes	1
TRINITY_DN48723_c0_g1	yes	1
TRINITY_DN29523_c0_g1	yes	1
TRINITY_DN58797_c0_g1	yes	1
TRINITY_DN27960_c0_g1	yes	1
TRINITY_DN46553_c2_g1	yes	1
TRINITY_DN52516_c3_g1	yes	1
TRINITY_DN35011_c0_g1	yes	1
TRINITY_DN47961_c0_g1	yes	1
TRINITY_DN45688_c1_g4	yes	1
TRINITY_DN68863_c0_g1	yes	1
TRINITY_DN34470_c0_g1	yes	1
TRINITY_DN52431_c2_g2	yes	1
TRINITY_DN86101_c0_g1	yes	1
TRINITY_DN40738_c0_g1	yes	1
TRINITY_DN49655_c1_g1	yes	1
TRINITY_DN51280_c0_g1	yes	1
TRINITY_DN44741_c0_g1	yes	1
TRINITY_DN41396_c0_g1	yes	1
TRINITY_DN28157_c0_g1	yes	1
TRINITY_DN35307_c0_g1	yes	1
TRINITY_DN42644_c0_g1	yes	1
TRINITY_DN49945_c0_g2	yes	1
TRINITY_DN46966_c3_g2	yes	1
TRINITY_DN39213_c0_g1	yes	1
TRINITY_DN52090_c7_g1	yes	1
TRINITY_DN46966_c3_g7	yes	1
TRINITY_DN46013_c0_g2	yes	1
TRINITY_DN41926_c0_g1	yes	1
TRINITY_DN49623_c0_g2	yes	1
TRINITY_DN41383_c0_g1	yes	1
TRINITY_DN1652_c0_g1	yes	1
TRINITY_DN42590_c0_g1	yes	1
TRINITY_DN28708_c0_g1	yes	1
TRINITY_DN39661_c0_g1	yes	1
TRINITY_DN34372_c0_g1	yes	1
TRINITY_DN45952_c0_g1	yes	1
TRINITY_DN40498_c0_g1	yes	1
TRINITY_DN17032_c0_g1	yes	1
TRINITY_DN40464_c1_g1	yes	1
TRINITY_DN25614_c0_g1	yes	1
TRINITY_DN20127_c0_g1	yes	1
TRINITY_DN50236_c1_g1	yes	1
TRINITY_DN45563_c1_g1	yes	1
TRINITY_DN45710_c0_g1	yes	1
TRINITY_DN49801_c2_g1	yes	1
TRINITY_DN17637_c0_g1	yes	1
TRINITY_DN31751_c0_g1	yes	1
TRINITY_DN46417_c0_g2	yes	1
TRINITY_DN37922_c0_g1	yes	1
TRINITY_DN89286_c0_g1	yes	1
TRINITY_DN49548_c0_g1	yes	1
TRINITY_DN42523_c0_g1	yes	1
TRINITY_DN40497_c0_g1	yes	1
TRINITY_DN49548_c0_g2	yes	1
TRINITY_DN52197_c4_g2	yes	1
TRINITY_DN38112_c0_g1	yes	1
TRINITY_DN30654_c0_g1	yes	1
TRINITY_DN35450_c0_g1	yes	1
TRINITY_DN34933_c0_g1	yes	1
TRINITY_DN42608_c2_g1	yes	1
TRINITY_DN52499_c12_g3	yes	1
TRINITY_DN51892_c0_g2	yes	1
TRINITY_DN15021_c0_g1	yes	1
TRINITY_DN45421_c0_g1	yes	1
TRINITY_DN33317_c0_g1	yes	1
TRINITY_DN49270_c0_g1	yes	1
TRINITY_DN52494_c8_g1	yes	1
TRINITY_DN37988_c0_g1	yes	1
TRINITY_DN8838_c0_g1	yes	1
TRINITY_DN50554_c2_g1	yes	1
TRINITY_DN51300_c1_g1	yes	1
TRINITY_DN6649_c0_g1	yes	1
TRINITY_DN45840_c0_g1	yes	1
TRINITY_DN50358_c1_g1	yes	1
TRINITY_DN40657_c0_g1	yes	1
TRINITY_DN16568_c0_g1	yes	1
TRINITY_DN51016_c1_g4	yes	1
TRINITY_DN25214_c0_g1	yes	1
TRINITY_DN41159_c1_g1	yes	1
TRINITY_DN32209_c0_g1	yes	1
TRINITY_DN37341_c0_g1	yes	1
TRINITY_DN43509_c0_g1	yes	1
TRINITY_DN49314_c4_g1	yes	1
TRINITY_DN24313_c0_g1	yes	1
TRINITY_DN18626_c0_g1	yes	1
TRINITY_DN36184_c0_g1	yes	1
TRINITY_DN50422_c0_g1	yes	1
TRINITY_DN78001_c0_g1	yes	1
TRINITY_DN87500_c0_g1	yes	1
TRINITY_DN49278_c0_g1	yes	1
TRINITY_DN51994_c1_g1	yes	1
TRINITY_DN47859_c0_g2	yes	1
TRINITY_DN51021_c0_g1	yes	1
TRINITY_DN51381_c3_g1	yes	1
TRINITY_DN44273_c0_g1	yes	1
TRINITY_DN44708_c0_g1	yes	1
TRINITY_DN34685_c0_g1	yes	1
TRINITY_DN45484_c10_g1	yes	1
TRINITY_DN37377_c0_g1	yes	1
TRINITY_DN48763_c1_g1	yes	1
TRINITY_DN49691_c1_g1	yes	1
TRINITY_DN35434_c0_g1	yes	1
TRINITY_DN48479_c0_g2	yes	1
TRINITY_DN47532_c1_g1	yes	1
TRINITY_DN52473_c0_g4	yes	1
TRINITY_DN41553_c0_g1	yes	1
TRINITY_DN52123_c1_g3	yes	1
TRINITY_DN50961_c2_g1	yes	1
TRINITY_DN62950_c0_g1	yes	1
TRINITY_DN50750_c3_g2	yes	1
TRINITY_DN44601_c0_g1	yes	1
TRINITY_DN42044_c0_g1	yes	1
TRINITY_DN43660_c0_g1	yes	1
TRINITY_DN48675_c4_g2	yes	1
TRINITY_DN45381_c0_g1	yes	1
TRINITY_DN40199_c0_g1	yes	1
TRINITY_DN31350_c0_g1	yes	1
TRINITY_DN59371_c0_g1	yes	1
TRINITY_DN45330_c0_g1	yes	1
TRINITY_DN42195_c0_g1	yes	1
TRINITY_DN40542_c0_g1	yes	1
TRINITY_DN32648_c0_g1	yes	1
TRINITY_DN47164_c0_g2	yes	1
TRINITY_DN38886_c1_g1	yes	1
TRINITY_DN32039_c0_g1	yes	1
TRINITY_DN44539_c0_g1	yes	1
TRINITY_DN51632_c0_g1	yes	1
TRINITY_DN35623_c0_g1	yes	1
TRINITY_DN40484_c0_g1	yes	1
TRINITY_DN9915_c0_g1	yes	1
TRINITY_DN23492_c0_g1	yes	1
TRINITY_DN47990_c0_g1	yes	1
TRINITY_DN22866_c0_g1	yes	1
TRINITY_DN6750_c0_g1	yes	1
TRINITY_DN20911_c0_g1	yes	1
TRINITY_DN43440_c0_g2	yes	1
TRINITY_DN98623_c0_g1	yes	1
TRINITY_DN34240_c0_g1	yes	1
TRINITY_DN45664_c3_g1	yes	1
TRINITY_DN49076_c1_g1	yes	1
TRINITY_DN49076_c1_g2	yes	1
TRINITY_DN46889_c0_g1	yes	1
TRINITY_DN51865_c3_g3	yes	1
TRINITY_DN19607_c0_g1	yes	1
TRINITY_DN51865_c3_g1	yes	1
TRINITY_DN26387_c0_g1	yes	1
TRINITY_DN50808_c3_g1	yes	1
TRINITY_DN78750_c0_g1	yes	1
TRINITY_DN47614_c0_g1	yes	1
TRINITY_DN42217_c0_g1	yes	1
TRINITY_DN40326_c0_g1	yes	1
TRINITY_DN28172_c0_g1	yes	1
TRINITY_DN48379_c0_g1	yes	1
TRINITY_DN46781_c0_g1	yes	1
TRINITY_DN51084_c4_g1	yes	1
TRINITY_DN49440_c1_g1	yes	1
TRINITY_DN45853_c0_g1	yes	1
TRINITY_DN27716_c1_g1	yes	1
TRINITY_DN51931_c1_g1	yes	1
TRINITY_DN44108_c5_g1	yes	1
TRINITY_DN38373_c0_g1	yes	1
TRINITY_DN33944_c0_g1	yes	1
TRINITY_DN20753_c0_g1	yes	1
TRINITY_DN46125_c0_g1	yes	1
TRINITY_DN32082_c0_g1	yes	1
TRINITY_DN5269_c0_g1	yes	1
TRINITY_DN19911_c0_g1	yes	1
TRINITY_DN46531_c0_g1	yes	1
TRINITY_DN25208_c0_g1	yes	1
TRINITY_DN17497_c0_g1	yes	1
TRINITY_DN34110_c0_g1	yes	1
TRINITY_DN49356_c4_g2	yes	1
TRINITY_DN94747_c0_g1	yes	1
TRINITY_DN49356_c4_g1	yes	1
TRINITY_DN45638_c0_g1	yes	1
TRINITY_DN43421_c0_g1	yes	1
TRINITY_DN46840_c0_g1	yes	1
TRINITY_DN36070_c1_g1	yes	1
TRINITY_DN50308_c1_g1	yes	1
TRINITY_DN47598_c1_g8	yes	1
TRINITY_DN51481_c0_g4	yes	1
TRINITY_DN34847_c0_g1	yes	1
TRINITY_DN50672_c0_g1	yes	1
TRINITY_DN4678_c0_g1	yes	1
TRINITY_DN42528_c0_g2	yes	1
TRINITY_DN49136_c1_g1	yes	1
TRINITY_DN27267_c0_g1	yes	1
TRINITY_DN48406_c1_g1	yes	1
TRINITY_DN51817_c1_g2	yes	1
TRINITY_DN51879_c7_g2	yes	1
TRINITY_DN50502_c1_g1	yes	1
TRINITY_DN48679_c2_g2	yes	1
TRINITY_DN18761_c0_g1	yes	1
TRINITY_DN42245_c0_g2	yes	1
TRINITY_DN52570_c11_g1	yes	1
TRINITY_DN17277_c0_g1	yes	1
TRINITY_DN47233_c0_g1	yes	1
TRINITY_DN47750_c4_g1	yes	1
TRINITY_DN42463_c0_g1	yes	1
TRINITY_DN58041_c0_g1	yes	1
TRINITY_DN48768_c0_g1	yes	1
TRINITY_DN34849_c0_g1	yes	1
TRINITY_DN48520_c1_g1	yes	1
TRINITY_DN15153_c0_g1	yes	1
TRINITY_DN41908_c0_g1	yes	1
TRINITY_DN46637_c0_g2	yes	1
TRINITY_DN8210_c0_g1	yes	1
TRINITY_DN4506_c0_g1	yes	1
TRINITY_DN38171_c0_g1	yes	1
TRINITY_DN49492_c0_g2	yes	1
TRINITY_DN24247_c0_g1	yes	1
TRINITY_DN34537_c0_g1	yes	1
TRINITY_DN49046_c2_g1	yes	1
TRINITY_DN50364_c2_g1	yes	1
TRINITY_DN44009_c0_g1	yes	1
TRINITY_DN47443_c0_g1	yes	1
TRINITY_DN41951_c0_g1	yes	1
TRINITY_DN47476_c2_g1	yes	1
TRINITY_DN31087_c0_g1	yes	1
TRINITY_DN42884_c0_g1	yes	1
TRINITY_DN43672_c0_g1	yes	1
TRINITY_DN48353_c0_g1	yes	1
TRINITY_DN44161_c0_g1	yes	1
TRINITY_DN51899_c0_g1	yes	1
TRINITY_DN50894_c3_g2	yes	1
TRINITY_DN44536_c1_g1	yes	1
TRINITY_DN26084_c0_g1	yes	1
TRINITY_DN43428_c0_g1	yes	1
TRINITY_DN41534_c0_g1	yes	1
TRINITY_DN41103_c0_g1	yes	1
TRINITY_DN11668_c0_g1	yes	1
TRINITY_DN33285_c0_g1	yes	1
TRINITY_DN45078_c0_g1	yes	1
TRINITY_DN31436_c0_g2	yes	1
TRINITY_DN59268_c0_g1	yes	1
TRINITY_DN21499_c0_g1	yes	1
TRINITY_DN37279_c0_g1	yes	1
TRINITY_DN40916_c0_g1	yes	1
TRINITY_DN35562_c0_g1	yes	1
TRINITY_DN37277_c0_g1	yes	1
TRINITY_DN1815_c0_g1	yes	1
TRINITY_DN41405_c0_g2	yes	1
TRINITY_DN22147_c0_g1	yes	1
TRINITY_DN50517_c1_g1	yes	1
TRINITY_DN50517_c1_g2	yes	1
TRINITY_DN51189_c0_g2	yes	1
TRINITY_DN40513_c0_g1	yes	1
TRINITY_DN48955_c5_g3	yes	1
TRINITY_DN8548_c0_g1	yes	1
TRINITY_DN30591_c0_g1	yes	1
TRINITY_DN49876_c0_g2	yes	1
TRINITY_DN79267_c0_g1	yes	1
TRINITY_DN52163_c3_g1	yes	1
TRINITY_DN29778_c0_g1	yes	1
TRINITY_DN3473_c0_g1	yes	1
TRINITY_DN32479_c0_g1	yes	1
TRINITY_DN36366_c0_g1	yes	1
TRINITY_DN46812_c6_g1	yes	1
TRINITY_DN29953_c0_g1	yes	1
TRINITY_DN46667_c0_g1	yes	1
TRINITY_DN66861_c0_g1	yes	1
TRINITY_DN17708_c0_g1	yes	1
TRINITY_DN51266_c0_g2	yes	1
TRINITY_DN47553_c0_g2	yes	1
TRINITY_DN42727_c0_g1	yes	1
TRINITY_DN41879_c0_g1	yes	1
TRINITY_DN11282_c0_g1	yes	1
TRINITY_DN41174_c0_g1	yes	1
TRINITY_DN22712_c0_g1	yes	1
TRINITY_DN10024_c0_g1	yes	1
TRINITY_DN44664_c1_g2	yes	1
TRINITY_DN39517_c0_g1	yes	1
TRINITY_DN49805_c5_g2	yes	1
TRINITY_DN82333_c0_g1	yes	1
TRINITY_DN40732_c0_g1	yes	1
TRINITY_DN44027_c0_g1	yes	1
TRINITY_DN42386_c0_g2	yes	1
TRINITY_DN42654_c0_g1	yes	1
TRINITY_DN42357_c0_g2	yes	1
TRINITY_DN93966_c0_g1	yes	1
TRINITY_DN36131_c0_g1	yes	1
TRINITY_DN42357_c0_g1	yes	1
TRINITY_DN51273_c0_g1	yes	1
TRINITY_DN25971_c0_g1	yes	1
TRINITY_DN49803_c3_g2	yes	1
TRINITY_DN48789_c0_g1	yes	1
TRINITY_DN47851_c0_g2	yes	1
TRINITY_DN49249_c2_g1	yes	1
TRINITY_DN18869_c0_g1	yes	1
TRINITY_DN44902_c1_g1	yes	1
TRINITY_DN45910_c0_g1	yes	1
TRINITY_DN47039_c2_g4	yes	1
TRINITY_DN49094_c1_g3	yes	1
TRINITY_DN40396_c0_g1	yes	1
TRINITY_DN46329_c0_g1	yes	1
TRINITY_DN42320_c0_g1	yes	1
TRINITY_DN31207_c0_g1	yes	1
TRINITY_DN45138_c0_g1	yes	1
TRINITY_DN30195_c0_g1	yes	1
TRINITY_DN71197_c0_g1	yes	1
TRINITY_DN48077_c0_g1	yes	1
TRINITY_DN46135_c0_g1	yes	1
TRINITY_DN46427_c0_g2	yes	1
TRINITY_DN44572_c0_g1	yes	1
TRINITY_DN49348_c0_g1	yes	1
TRINITY_DN44572_c0_g2	yes	1
TRINITY_DN45467_c1_g1	yes	1
TRINITY_DN88725_c0_g1	yes	1
TRINITY_DN43129_c0_g1	yes	1
TRINITY_DN33765_c0_g2	yes	1
TRINITY_DN39503_c0_g1	yes	1
TRINITY_DN10834_c0_g1	yes	1
TRINITY_DN49231_c1_g2	yes	1
TRINITY_DN50244_c0_g1	yes	1
TRINITY_DN50244_c0_g2	yes	1
TRINITY_DN35452_c0_g1	yes	1
TRINITY_DN42389_c2_g1	yes	1
TRINITY_DN27996_c0_g1	yes	1
TRINITY_DN42389_c2_g3	yes	1
TRINITY_DN86818_c0_g1	yes	1
TRINITY_DN21843_c0_g1	yes	1
TRINITY_DN41901_c0_g1	yes	1
TRINITY_DN38616_c0_g1	yes	1
TRINITY_DN19897_c0_g1	yes	1
TRINITY_DN42078_c0_g1	yes	1
TRINITY_DN25428_c0_g1	yes	1
TRINITY_DN36651_c0_g1	yes	1
TRINITY_DN51844_c2_g1	yes	1
TRINITY_DN33364_c0_g1	yes	1
TRINITY_DN94322_c0_g1	yes	1
TRINITY_DN38257_c0_g1	yes	1
TRINITY_DN50937_c0_g1	yes	1
TRINITY_DN47698_c0_g2	yes	1
TRINITY_DN47698_c0_g1	yes	1
TRINITY_DN25794_c0_g1	yes	1
TRINITY_DN20855_c0_g1	yes	1
TRINITY_DN38408_c0_g1	yes	1
TRINITY_DN32555_c0_g1	yes	1
TRINITY_DN35572_c0_g1	yes	1
TRINITY_DN50049_c0_g1	yes	1
TRINITY_DN47031_c0_g2	yes	1
TRINITY_DN48751_c0_g3	yes	1
TRINITY_DN47031_c0_g1	yes	1
TRINITY_DN39118_c0_g1	yes	1
TRINITY_DN49388_c1_g1	yes	1
TRINITY_DN43793_c0_g2	yes	1
TRINITY_DN50568_c0_g1	yes	1
TRINITY_DN25857_c0_g1	yes	1
TRINITY_DN12409_c0_g1	yes	1
TRINITY_DN43859_c0_g1	yes	1
TRINITY_DN44081_c0_g2	yes	1
TRINITY_DN51922_c4_g5	yes	1
TRINITY_DN44658_c0_g1	yes	1
TRINITY_DN67333_c0_g1	yes	1
TRINITY_DN22097_c0_g1	yes	1
TRINITY_DN5259_c0_g1	yes	1
TRINITY_DN35080_c0_g1	yes	1
TRINITY_DN52010_c1_g1	yes	1
TRINITY_DN32650_c0_g1	yes	1
TRINITY_DN46077_c1_g1	yes	1
TRINITY_DN31127_c0_g1	yes	1
TRINITY_DN38973_c0_g1	yes	1
TRINITY_DN24262_c0_g1	yes	1
TRINITY_DN9729_c0_g1	yes	1
TRINITY_DN48409_c0_g1	yes	1
TRINITY_DN20343_c0_g1	yes	1
TRINITY_DN41890_c0_g1	yes	1
TRINITY_DN50439_c1_g2	yes	1
TRINITY_DN43612_c0_g1	yes	1
TRINITY_DN49292_c0_g1	yes	1
TRINITY_DN51066_c1_g1	yes	1
TRINITY_DN48379_c2_g2	yes	1
TRINITY_DN80393_c0_g1	yes	1
TRINITY_DN47391_c0_g1	yes	1
TRINITY_DN27453_c0_g1	yes	1
TRINITY_DN35094_c0_g1	yes	1
TRINITY_DN34533_c0_g1	yes	1
TRINITY_DN26203_c0_g1	yes	1
TRINITY_DN31472_c0_g1	yes	1
TRINITY_DN47589_c0_g1	yes	1
TRINITY_DN49782_c0_g1	yes	1
TRINITY_DN36405_c0_g2	yes	1
TRINITY_DN36405_c0_g1	yes	1
TRINITY_DN48491_c0_g1	yes	1
TRINITY_DN49152_c0_g1	yes	1
TRINITY_DN30060_c0_g1	yes	1
TRINITY_DN32690_c0_g1	yes	1
TRINITY_DN99605_c0_g1	yes	1
TRINITY_DN71536_c0_g1	yes	1
TRINITY_DN37706_c0_g1	yes	1
TRINITY_DN37706_c0_g2	yes	1
TRINITY_DN47220_c0_g1	yes	1
TRINITY_DN52364_c5_g6	yes	1
TRINITY_DN50012_c1_g2	yes	1
TRINITY_DN50012_c1_g3	yes	1
TRINITY_DN31225_c1_g1	yes	1
TRINITY_DN52496_c5_g1	yes	1
TRINITY_DN48912_c1_g1	yes	1
TRINITY_DN50851_c0_g4	yes	1
TRINITY_DN50345_c0_g1	yes	1
TRINITY_DN52534_c7_g3	yes	1
TRINITY_DN50488_c0_g2	yes	1
TRINITY_DN49803_c4_g3	yes	1
TRINITY_DN40906_c1_g3	yes	1
TRINITY_DN10954_c0_g1	yes	1
TRINITY_DN16353_c0_g1	yes	1
TRINITY_DN44274_c0_g1	yes	1
TRINITY_DN34942_c0_g1	yes	1
TRINITY_DN7016_c0_g1	yes	1
TRINITY_DN47773_c2_g1	yes	1
TRINITY_DN26075_c0_g1	yes	1
TRINITY_DN31149_c0_g1	yes	1
TRINITY_DN100752_c0_g1	yes	1
TRINITY_DN23477_c0_g1	yes	1
TRINITY_DN51439_c0_g1	yes	1
TRINITY_DN52521_c4_g2	yes	1
TRINITY_DN5920_c0_g1	yes	1
TRINITY_DN52534_c6_g1	yes	1
TRINITY_DN57928_c0_g1	yes	1
TRINITY_DN50690_c0_g1	yes	1
TRINITY_DN45406_c0_g1	yes	1
TRINITY_DN38243_c0_g1	yes	1
TRINITY_DN41392_c0_g1	yes	1
TRINITY_DN34996_c0_g1	yes	1
TRINITY_DN8543_c0_g1	yes	1
TRINITY_DN31978_c0_g1	yes	1
TRINITY_DN37361_c0_g1	yes	1
TRINITY_DN21192_c0_g1	yes	1
TRINITY_DN69902_c0_g1	yes	1
TRINITY_DN39283_c0_g1	yes	1
TRINITY_DN52359_c9_g6	yes	1
TRINITY_DN50615_c0_g2	yes	1
TRINITY_DN25824_c0_g1	yes	1
TRINITY_DN48396_c1_g1	yes	1
TRINITY_DN46944_c0_g1	yes	1
TRINITY_DN51659_c2_g1	yes	1
TRINITY_DN50660_c0_g1	yes	1
TRINITY_DN23436_c0_g1	yes	1
TRINITY_DN50917_c0_g1	yes	1
TRINITY_DN52080_c1_g3	yes	1
TRINITY_DN47271_c0_g1	yes	1
TRINITY_DN52349_c0_g1	yes	1
TRINITY_DN49232_c0_g1	yes	1
TRINITY_DN50956_c1_g1	yes	1
TRINITY_DN51970_c4_g4	yes	1
TRINITY_DN82471_c0_g1	yes	1
TRINITY_DN44044_c0_g1	yes	1
TRINITY_DN44776_c0_g1	yes	1
TRINITY_DN52154_c1_g1	yes	1
TRINITY_DN36396_c0_g1	yes	1
TRINITY_DN50200_c0_g1	yes	1
TRINITY_DN47534_c1_g5	yes	1
TRINITY_DN46200_c0_g1	yes	1
TRINITY_DN50223_c0_g1	yes	1
TRINITY_DN35287_c0_g1	yes	1
TRINITY_DN41368_c0_g1	yes	1
TRINITY_DN30866_c0_g1	yes	1
TRINITY_DN39989_c0_g1	yes	1
TRINITY_DN47930_c4_g1	yes	1
TRINITY_DN12799_c0_g1	yes	1
TRINITY_DN48645_c0_g1	yes	1
TRINITY_DN47165_c0_g2	yes	1
TRINITY_DN34312_c0_g1	yes	1
TRINITY_DN39910_c0_g1	yes	1
TRINITY_DN51193_c0_g1	yes	1
TRINITY_DN51862_c3_g1	yes	1
TRINITY_DN39987_c0_g1	yes	1
TRINITY_DN51970_c4_g2	yes	1
TRINITY_DN50120_c1_g4	yes	1
TRINITY_DN49475_c0_g1	yes	1
TRINITY_DN43745_c0_g1	yes	1
TRINITY_DN43193_c1_g1	yes	1
TRINITY_DN8915_c0_g1	yes	1
TRINITY_DN96755_c0_g1	yes	1
TRINITY_DN51492_c1_g1	yes	1
TRINITY_DN48059_c0_g1	yes	1
TRINITY_DN39137_c0_g1	yes	1
TRINITY_DN6204_c0_g1	yes	1
TRINITY_DN37566_c0_g1	yes	1
TRINITY_DN35828_c0_g1	yes	1
TRINITY_DN10334_c0_g1	yes	1
TRINITY_DN31009_c0_g1	yes	1
TRINITY_DN19840_c0_g1	yes	1
TRINITY_DN25585_c0_g1	yes	1
TRINITY_DN28215_c0_g1	yes	1
TRINITY_DN47675_c0_g1	yes	1
TRINITY_DN49486_c1_g2	yes	1
TRINITY_DN44808_c1_g1	yes	1
TRINITY_DN46854_c0_g1	yes	1
TRINITY_DN49595_c1_g4	yes	1
TRINITY_DN49595_c1_g5	yes	1
TRINITY_DN42193_c1_g1	yes	1
TRINITY_DN49595_c1_g2	yes	1
TRINITY_DN40316_c1_g1	yes	1
TRINITY_DN4432_c0_g1	yes	1
TRINITY_DN40117_c0_g1	yes	1
TRINITY_DN21922_c0_g1	yes	1
TRINITY_DN32406_c0_g1	yes	1
TRINITY_DN48355_c0_g1	yes	1
TRINITY_DN44607_c0_g1	yes	1
TRINITY_DN49099_c0_g1	yes	1
TRINITY_DN49079_c0_g1	yes	1
TRINITY_DN35793_c0_g1	yes	1
TRINITY_DN47599_c0_g1	yes	1
TRINITY_DN22596_c0_g1	yes	1
TRINITY_DN39004_c0_g2	yes	1
TRINITY_DN46204_c0_g1	yes	1
TRINITY_DN50621_c1_g1	yes	1
TRINITY_DN37686_c0_g1	yes	1
TRINITY_DN38840_c0_g1	yes	1
TRINITY_DN37930_c0_g2	yes	1
TRINITY_DN45128_c0_g1	yes	1
TRINITY_DN41825_c0_g1	yes	1
TRINITY_DN42214_c0_g1	yes	1
TRINITY_DN35686_c0_g1	yes	1
TRINITY_DN45302_c0_g1	yes	1
TRINITY_DN43360_c0_g1	yes	1
TRINITY_DN49121_c3_g1	yes	1
TRINITY_DN4170_c0_g1	yes	1
TRINITY_DN41162_c0_g1	yes	1
TRINITY_DN1424_c0_g1	yes	1
TRINITY_DN13131_c0_g1	yes	1
TRINITY_DN42035_c0_g1	yes	1
TRINITY_DN50889_c0_g1	yes	1
TRINITY_DN41090_c0_g1	yes	1
TRINITY_DN50512_c2_g1	yes	1
TRINITY_DN51808_c0_g1	yes	1
TRINITY_DN40361_c0_g1	yes	1
TRINITY_DN33414_c0_g1	yes	1
TRINITY_DN51018_c0_g1	yes	1
TRINITY_DN25314_c0_g1	yes	1
TRINITY_DN41653_c0_g1	yes	1
TRINITY_DN45062_c1_g1	yes	1
TRINITY_DN49505_c0_g1	yes	1
TRINITY_DN41028_c0_g2	yes	1
TRINITY_DN48063_c0_g2	yes	1
TRINITY_DN34906_c0_g1	yes	1
TRINITY_DN41028_c0_g1	yes	1
TRINITY_DN51781_c1_g3	yes	1
TRINITY_DN36824_c0_g2	yes	1
TRINITY_DN25035_c0_g1	yes	1
TRINITY_DN34811_c0_g1	yes	1
TRINITY_DN6917_c0_g1	yes	1
TRINITY_DN51268_c1_g3	yes	1
TRINITY_DN40407_c0_g1	yes	1
TRINITY_DN38897_c0_g1	yes	1
TRINITY_DN38487_c0_g1	yes	1
TRINITY_DN29629_c0_g1	yes	1
TRINITY_DN44638_c0_g2	yes	1
TRINITY_DN25963_c0_g1	yes	1
TRINITY_DN50605_c2_g1	yes	1
TRINITY_DN44912_c0_g1	yes	1
TRINITY_DN51666_c0_g1	yes	1
TRINITY_DN44442_c0_g1	yes	1
TRINITY_DN21462_c0_g1	yes	1
TRINITY_DN19067_c0_g1	yes	1
TRINITY_DN50515_c5_g1	yes	1
TRINITY_DN46917_c0_g1	yes	1
TRINITY_DN48321_c0_g1	yes	1
TRINITY_DN50165_c0_g1	yes	1
TRINITY_DN46865_c0_g1	yes	1
TRINITY_DN30589_c0_g2	yes	1
TRINITY_DN44746_c0_g1	yes	1
TRINITY_DN8579_c0_g1	yes	1
TRINITY_DN34108_c0_g1	yes	1
TRINITY_DN48367_c2_g2	yes	1
TRINITY_DN22439_c0_g1	yes	1
TRINITY_DN28714_c0_g1	yes	1
TRINITY_DN9795_c0_g1	yes	1
TRINITY_DN29704_c0_g1	yes	1
TRINITY_DN51639_c8_g2	yes	1
TRINITY_DN50152_c0_g2	yes	1
TRINITY_DN52574_c6_g1	yes	1
TRINITY_DN50152_c0_g1	yes	1
TRINITY_DN48870_c0_g3	yes	1
TRINITY_DN22661_c0_g1	yes	1
TRINITY_DN49736_c2_g2	yes	1
TRINITY_DN43520_c0_g1	yes	1
TRINITY_DN43134_c0_g1	yes	1
TRINITY_DN51464_c0_g1	yes	1
TRINITY_DN33502_c0_g1	yes	1
TRINITY_DN48057_c0_g1	yes	1
TRINITY_DN37905_c1_g1	yes	1
TRINITY_DN38746_c0_g1	yes	1
TRINITY_DN52084_c4_g1	yes	1
TRINITY_DN37450_c0_g1	yes	1
TRINITY_DN27605_c1_g1	yes	1
TRINITY_DN34692_c0_g1	yes	1
TRINITY_DN38587_c0_g1	yes	1
TRINITY_DN48718_c0_g1	yes	1
TRINITY_DN50958_c1_g1	yes	1
TRINITY_DN44969_c2_g1	yes	1
TRINITY_DN49587_c0_g2	yes	1
TRINITY_DN44047_c0_g1	yes	1
TRINITY_DN51371_c4_g1	yes	1
TRINITY_DN34853_c0_g1	yes	1
TRINITY_DN48627_c0_g2	yes	1
TRINITY_DN45886_c1_g1	yes	1
TRINITY_DN47789_c0_g1	yes	1
TRINITY_DN37909_c0_g1	yes	1
TRINITY_DN50372_c2_g1	yes	1
TRINITY_DN51993_c2_g1	yes	1
TRINITY_DN45560_c0_g1	yes	1
TRINITY_DN15116_c0_g1	yes	1
TRINITY_DN13484_c0_g1	yes	1
TRINITY_DN32664_c0_g1	yes	1
TRINITY_DN80257_c0_g1	yes	1
TRINITY_DN51238_c4_g2	yes	1
TRINITY_DN41769_c1_g1	yes	1
TRINITY_DN40625_c0_g1	yes	1
TRINITY_DN24047_c0_g1	yes	1
TRINITY_DN33008_c0_g1	yes	1
TRINITY_DN51898_c5_g3	yes	1
TRINITY_DN42227_c0_g1	yes	1
TRINITY_DN26076_c0_g1	yes	1
TRINITY_DN46193_c0_g1	yes	1
TRINITY_DN41229_c0_g1	yes	1
TRINITY_DN47972_c1_g1	yes	1
TRINITY_DN21978_c0_g1	yes	1
TRINITY_DN27790_c0_g1	yes	1
TRINITY_DN47722_c0_g1	yes	1
TRINITY_DN44632_c3_g1	yes	1
TRINITY_DN39320_c0_g1	yes	1
TRINITY_DN39631_c0_g1	yes	1
TRINITY_DN50421_c2_g2	yes	1
TRINITY_DN50421_c2_g1	yes	1
TRINITY_DN35673_c0_g1	yes	1
TRINITY_DN49488_c0_g1	yes	1
TRINITY_DN1325_c0_g1	yes	1
TRINITY_DN50951_c1_g2	yes	1
TRINITY_DN47132_c4_g1	yes	1
TRINITY_DN50951_c1_g1	yes	1
TRINITY_DN51206_c2_g1	yes	1
TRINITY_DN35429_c0_g1	yes	1
TRINITY_DN49572_c1_g1	yes	1
TRINITY_DN34201_c0_g1	yes	1
TRINITY_DN10811_c0_g1	yes	1
TRINITY_DN50649_c0_g1	yes	1
TRINITY_DN46626_c1_g1	yes	1
TRINITY_DN46626_c1_g2	yes	1
TRINITY_DN86634_c0_g1	yes	1
TRINITY_DN44426_c0_g1	yes	1
TRINITY_DN52669_c0_g1	yes	1
TRINITY_DN46642_c2_g5	yes	1
TRINITY_DN46869_c0_g1	yes	1
TRINITY_DN6220_c0_g1	yes	1
TRINITY_DN13277_c0_g1	yes	1
TRINITY_DN44041_c0_g1	yes	1
TRINITY_DN38829_c0_g1	yes	1
TRINITY_DN45991_c0_g2	yes	1
TRINITY_DN41058_c0_g1	yes	1
TRINITY_DN39086_c0_g1	yes	1
TRINITY_DN50121_c1_g3	yes	1
TRINITY_DN34263_c0_g1	yes	1
TRINITY_DN36185_c0_g1	yes	1
TRINITY_DN50634_c5_g6	yes	1
TRINITY_DN21899_c1_g1	yes	1
TRINITY_DN50121_c1_g2	yes	1
TRINITY_DN46412_c0_g1	yes	1
TRINITY_DN52291_c2_g1	yes	1
TRINITY_DN22238_c0_g1	yes	1
TRINITY_DN33889_c0_g1	yes	1
TRINITY_DN45655_c1_g2	yes	1
TRINITY_DN45655_c1_g1	yes	1
TRINITY_DN50071_c0_g1	yes	1
TRINITY_DN47764_c4_g1	yes	1
TRINITY_DN51825_c0_g2	yes	1
TRINITY_DN49468_c0_g1	yes	1
TRINITY_DN11159_c0_g1	yes	1
TRINITY_DN49992_c2_g2	yes	1
TRINITY_DN23740_c0_g1	yes	1
TRINITY_DN43798_c0_g1	yes	1
TRINITY_DN41504_c0_g1	yes	1
TRINITY_DN50331_c5_g1	yes	1
TRINITY_DN31918_c0_g1	yes	1
TRINITY_DN67483_c0_g1	yes	1
TRINITY_DN41752_c0_g1	yes	1
TRINITY_DN24941_c0_g1	yes	1
TRINITY_DN52207_c2_g1	yes	1
TRINITY_DN28235_c0_g1	yes	1
TRINITY_DN49819_c1_g1	yes	1
TRINITY_DN101563_c0_g1	yes	1
TRINITY_DN44017_c2_g1	yes	1
TRINITY_DN41980_c1_g1	yes	1
TRINITY_DN40237_c0_g1	yes	1
TRINITY_DN37891_c0_g1	yes	1
TRINITY_DN44514_c0_g1	yes	1
TRINITY_DN20774_c0_g1	yes	1
TRINITY_DN42843_c2_g1	yes	1
TRINITY_DN49411_c1_g1	yes	1
TRINITY_DN34556_c0_g1	yes	1
TRINITY_DN35707_c0_g1	yes	1
TRINITY_DN43747_c0_g1	yes	1
TRINITY_DN50800_c1_g2	yes	1
TRINITY_DN27261_c0_g1	yes	1
TRINITY_DN47258_c4_g3	yes	1
TRINITY_DN58719_c0_g1	yes	1
TRINITY_DN85309_c0_g1	yes	1
TRINITY_DN44424_c0_g1	yes	1
TRINITY_DN28378_c0_g1	yes	1
TRINITY_DN67034_c0_g1	yes	1
TRINITY_DN53303_c0_g1	yes	1
TRINITY_DN48009_c0_g1	yes	1
TRINITY_DN44280_c0_g1	yes	1
TRINITY_DN40780_c0_g1	yes	1
TRINITY_DN45090_c0_g1	yes	1
TRINITY_DN13778_c0_g1	yes	1
TRINITY_DN42709_c0_g1	yes	1
TRINITY_DN42892_c0_g1	yes	1
TRINITY_DN27588_c0_g1	yes	1
TRINITY_DN48514_c0_g1	yes	1
TRINITY_DN51201_c2_g2	yes	1
TRINITY_DN51201_c2_g4	yes	1
TRINITY_DN36292_c0_g1	yes	1
TRINITY_DN50192_c0_g1	yes	1
TRINITY_DN41949_c0_g1	yes	1
TRINITY_DN36180_c0_g1	yes	1
TRINITY_DN44788_c0_g1	yes	1
TRINITY_DN35016_c0_g1	yes	1
TRINITY_DN51505_c0_g1	yes	1
TRINITY_DN45202_c0_g1	yes	1
TRINITY_DN46909_c0_g1	yes	1
TRINITY_DN34597_c0_g1	yes	1
TRINITY_DN44141_c0_g1	yes	1
TRINITY_DN23657_c0_g1	yes	1
TRINITY_DN39851_c0_g1	yes	1
TRINITY_DN51665_c1_g1	yes	1
TRINITY_DN36138_c0_g1	yes	1
TRINITY_DN48525_c1_g1	yes	1
TRINITY_DN52391_c1_g1	yes	1
TRINITY_DN54999_c0_g1	yes	1
TRINITY_DN71041_c0_g1	yes	1
TRINITY_DN2354_c0_g1	yes	1
TRINITY_DN43297_c0_g2	yes	1
TRINITY_DN46982_c0_g1	yes	1
TRINITY_DN47387_c2_g1	yes	1
TRINITY_DN24922_c0_g1	yes	1
TRINITY_DN43997_c0_g3	yes	1
TRINITY_DN48968_c3_g4	yes	1
TRINITY_DN46924_c1_g2	yes	1
TRINITY_DN91718_c0_g1	yes	1
TRINITY_DN69436_c0_g1	yes	1
TRINITY_DN11521_c0_g1	yes	1
TRINITY_DN49516_c1_g2	yes	1
TRINITY_DN15035_c0_g1	yes	1
TRINITY_DN45183_c0_g1	yes	1
TRINITY_DN41751_c0_g1	yes	1
TRINITY_DN20420_c0_g1	yes	1
TRINITY_DN50520_c0_g1	yes	1
TRINITY_DN50465_c0_g3	yes	1
TRINITY_DN32244_c0_g1	yes	1
TRINITY_DN3928_c0_g1	yes	1
TRINITY_DN38718_c0_g1	yes	1
TRINITY_DN47686_c0_g1	yes	1
TRINITY_DN32352_c0_g1	yes	1
TRINITY_DN45176_c0_g1	yes	1
TRINITY_DN46420_c2_g4	yes	1
TRINITY_DN44183_c1_g1	yes	1
TRINITY_DN46132_c2_g1	yes	1
TRINITY_DN52534_c6_g2	yes	1
TRINITY_DN46420_c2_g3	yes	1
TRINITY_DN46420_c2_g2	yes	1
TRINITY_DN12748_c0_g1	yes	1
TRINITY_DN62579_c0_g1	yes	1
TRINITY_DN48861_c3_g1	yes	1
TRINITY_DN48861_c3_g3	yes	1
TRINITY_DN42458_c0_g1	yes	1
TRINITY_DN16113_c0_g1	yes	1
TRINITY_DN48861_c3_g4	yes	1
TRINITY_DN32563_c0_g1	yes	1
TRINITY_DN46906_c6_g1	yes	1
TRINITY_DN17258_c0_g1	yes	1
TRINITY_DN52541_c5_g2	yes	1
TRINITY_DN27133_c0_g1	yes	1
TRINITY_DN48695_c2_g2	yes	1
TRINITY_DN39029_c0_g1	yes	1
TRINITY_DN48579_c0_g1	yes	1
TRINITY_DN32732_c0_g1	yes	1
TRINITY_DN24418_c0_g1	yes	1
TRINITY_DN43876_c0_g1	yes	1
TRINITY_DN10165_c0_g1	yes	1
TRINITY_DN46356_c0_g1	yes	1
TRINITY_DN36880_c0_g1	yes	1
TRINITY_DN36781_c0_g1	yes	1
TRINITY_DN51084_c2_g1	yes	1
TRINITY_DN34510_c0_g1	yes	1
TRINITY_DN45038_c2_g2	yes	1
TRINITY_DN46358_c0_g1	yes	1
TRINITY_DN77830_c0_g1	yes	1
TRINITY_DN10669_c0_g1	yes	1
TRINITY_DN46062_c1_g1	yes	1
TRINITY_DN45290_c0_g1	yes	1
TRINITY_DN47622_c0_g1	yes	1
TRINITY_DN85393_c0_g1	yes	1
TRINITY_DN45492_c2_g2	yes	1
TRINITY_DN46609_c0_g2	yes	1
TRINITY_DN37230_c0_g1	yes	1
TRINITY_DN45303_c0_g1	yes	1
TRINITY_DN52356_c4_g6	yes	1
TRINITY_DN42595_c0_g1	yes	1
TRINITY_DN52356_c4_g2	yes	1
TRINITY_DN37845_c0_g1	yes	1
TRINITY_DN52356_c4_g1	yes	1
TRINITY_DN37770_c0_g1	yes	1
TRINITY_DN46609_c0_g1	yes	1
TRINITY_DN11206_c0_g1	yes	1
TRINITY_DN38660_c0_g1	yes	1
TRINITY_DN46240_c0_g1	yes	1
TRINITY_DN51985_c0_g2	yes	1
TRINITY_DN33132_c0_g1	yes	1
TRINITY_DN51555_c1_g3	yes	1
TRINITY_DN51555_c1_g2	yes	1
TRINITY_DN42903_c0_g2	yes	1
TRINITY_DN22146_c0_g1	yes	1
TRINITY_DN49534_c0_g1	yes	1
TRINITY_DN27034_c0_g1	yes	1
TRINITY_DN27608_c0_g1	yes	1
TRINITY_DN48704_c0_g1	yes	1
TRINITY_DN28655_c0_g1	yes	1
TRINITY_DN42542_c0_g1	yes	1
TRINITY_DN22524_c0_g1	yes	1
TRINITY_DN48870_c0_g1	yes	1
TRINITY_DN40609_c0_g1	yes	1
TRINITY_DN47096_c0_g1	yes	1
TRINITY_DN28018_c0_g1	yes	1
TRINITY_DN45480_c1_g1	yes	1
TRINITY_DN49009_c0_g1	yes	1
TRINITY_DN38124_c0_g1	yes	1
TRINITY_DN36479_c0_g1	yes	1
TRINITY_DN22178_c0_g1	yes	1
TRINITY_DN43957_c0_g1	yes	1
TRINITY_DN30860_c0_g1	yes	1
TRINITY_DN19721_c0_g1	yes	1
TRINITY_DN50281_c1_g1	yes	1
TRINITY_DN14164_c0_g1	yes	1
TRINITY_DN51963_c1_g1	yes	1
TRINITY_DN39587_c0_g1	yes	1
TRINITY_DN52350_c0_g1	yes	1
TRINITY_DN59011_c0_g1	yes	1
TRINITY_DN51132_c1_g1	yes	1
TRINITY_DN43648_c0_g1	yes	1
TRINITY_DN37356_c0_g1	yes	1
TRINITY_DN45411_c0_g1	yes	1
TRINITY_DN62629_c0_g1	yes	1
TRINITY_DN24989_c0_g1	yes	1
TRINITY_DN47011_c0_g1	yes	1
TRINITY_DN51934_c0_g1	yes	1
TRINITY_DN40013_c0_g1	yes	1
TRINITY_DN47875_c0_g1	yes	1
TRINITY_DN49790_c2_g2	yes	1
TRINITY_DN43771_c0_g1	yes	1
TRINITY_DN34851_c0_g1	yes	1
TRINITY_DN49437_c1_g1	yes	1
TRINITY_DN22674_c0_g1	yes	1
TRINITY_DN49946_c4_g3	yes	1
TRINITY_DN35339_c0_g1	yes	1
TRINITY_DN39308_c0_g1	yes	1
TRINITY_DN22918_c1_g1	yes	1
TRINITY_DN36191_c0_g1	yes	1
TRINITY_DN43536_c1_g1	yes	1
TRINITY_DN13457_c0_g1	yes	1
TRINITY_DN34984_c0_g1	yes	1
TRINITY_DN41121_c0_g2	yes	1
TRINITY_DN47844_c0_g1	yes	1
TRINITY_DN48196_c0_g1	yes	1
TRINITY_DN20212_c0_g1	yes	1
TRINITY_DN39554_c0_g1	yes	1
TRINITY_DN14269_c0_g1	yes	1
TRINITY_DN52100_c1_g2	yes	1
TRINITY_DN49025_c0_g1	yes	1
TRINITY_DN52100_c1_g1	yes	1
TRINITY_DN47633_c1_g1	yes	1
TRINITY_DN6528_c0_g1	yes	1
TRINITY_DN41433_c0_g1	yes	1
TRINITY_DN33905_c0_g1	yes	1
TRINITY_DN38332_c0_g1	yes	1
TRINITY_DN29265_c0_g1	yes	1
TRINITY_DN44237_c0_g1	yes	1
TRINITY_DN48660_c1_g3	yes	1
TRINITY_DN49432_c1_g1	yes	1
TRINITY_DN49687_c6_g3	yes	1
TRINITY_DN46006_c1_g1	yes	1
TRINITY_DN52324_c1_g1	yes	1
TRINITY_DN33579_c0_g1	yes	1
TRINITY_DN36457_c0_g1	yes	1
TRINITY_DN43737_c0_g2	yes	1
TRINITY_DN43737_c0_g1	yes	1
TRINITY_DN49545_c0_g2	yes	1
TRINITY_DN32918_c0_g1	yes	1
TRINITY_DN51790_c1_g1	yes	1
TRINITY_DN29783_c0_g1	yes	1
TRINITY_DN30290_c0_g1	yes	1
TRINITY_DN49360_c1_g1	yes	1
TRINITY_DN18409_c0_g1	yes	1
TRINITY_DN49428_c0_g1	yes	1
TRINITY_DN40426_c0_g1	yes	1
TRINITY_DN47090_c2_g1	yes	1
TRINITY_DN47565_c0_g1	yes	1
TRINITY_DN47490_c0_g1	yes	1
TRINITY_DN48544_c1_g3	yes	1
TRINITY_DN3759_c0_g1	yes	1
TRINITY_DN52197_c2_g2	yes	1
TRINITY_DN43246_c0_g1	yes	1
TRINITY_DN35833_c0_g1	yes	1
TRINITY_DN41512_c0_g1	yes	1
TRINITY_DN51943_c1_g1	yes	1
TRINITY_DN62620_c0_g1	yes	1
TRINITY_DN36253_c0_g2	yes	1
TRINITY_DN24227_c0_g1	yes	1
TRINITY_DN35256_c0_g1	yes	1
TRINITY_DN45859_c0_g1	yes	1
TRINITY_DN42264_c0_g1	yes	1
TRINITY_DN29575_c0_g1	yes	1
TRINITY_DN71751_c0_g1	yes	1
TRINITY_DN98153_c0_g1	yes	1
TRINITY_DN42313_c0_g1	yes	1
TRINITY_DN41271_c0_g2	yes	1
TRINITY_DN37677_c0_g1	yes	1
TRINITY_DN37087_c0_g1	yes	1
TRINITY_DN50340_c0_g1	yes	1
TRINITY_DN52390_c1_g1	yes	1
TRINITY_DN49463_c0_g1	yes	1
TRINITY_DN45277_c0_g1	yes	1
TRINITY_DN30729_c0_g2	yes	1
TRINITY_DN86242_c0_g1	yes	1
TRINITY_DN41178_c0_g1	yes	1
TRINITY_DN23063_c0_g1	yes	1
TRINITY_DN43940_c0_g1	yes	1
TRINITY_DN40597_c0_g3	yes	1
TRINITY_DN18232_c0_g1	yes	1
TRINITY_DN49855_c4_g1	yes	1
TRINITY_DN42712_c0_g1	yes	1
TRINITY_DN58868_c0_g1	yes	1
TRINITY_DN94656_c0_g1	yes	1
TRINITY_DN43511_c1_g1	yes	1
TRINITY_DN46644_c0_g1	yes	1
TRINITY_DN44870_c2_g1	yes	1
TRINITY_DN50794_c2_g1	yes	1
TRINITY_DN51528_c0_g1	yes	1
TRINITY_DN68743_c0_g1	yes	1
TRINITY_DN41872_c0_g1	yes	1
TRINITY_DN25623_c0_g1	yes	1
TRINITY_DN51491_c0_g1	yes	1
TRINITY_DN78796_c0_g1	yes	1
TRINITY_DN51824_c2_g1	yes	1
TRINITY_DN51419_c1_g1	yes	1
TRINITY_DN51419_c1_g2	yes	1
TRINITY_DN46638_c0_g1	yes	1
TRINITY_DN92811_c0_g1	yes	1
TRINITY_DN36762_c0_g1	yes	1
TRINITY_DN38721_c0_g1	yes	1
TRINITY_DN41672_c0_g2	yes	1
TRINITY_DN45425_c3_g2	yes	1
TRINITY_DN17752_c0_g1	yes	1
TRINITY_DN49181_c5_g4	yes	1
TRINITY_DN52417_c1_g2	yes	1
TRINITY_DN41954_c0_g2	yes	1
TRINITY_DN50336_c0_g1	yes	1
TRINITY_DN27891_c0_g1	yes	1
TRINITY_DN45289_c1_g4	yes	1
TRINITY_DN37997_c0_g1	yes	1
TRINITY_DN31123_c0_g1	yes	1
TRINITY_DN49900_c0_g2	yes	1
TRINITY_DN22084_c0_g1	yes	1
TRINITY_DN29119_c0_g1	yes	1
TRINITY_DN47409_c1_g1	yes	1
TRINITY_DN47126_c0_g1	yes	1
TRINITY_DN41832_c0_g1	yes	1
TRINITY_DN48777_c0_g2	yes	1
TRINITY_DN51016_c1_g1	yes	1
TRINITY_DN15717_c0_g1	yes	1
TRINITY_DN1219_c0_g1	yes	1
TRINITY_DN48608_c0_g3	yes	1
TRINITY_DN29942_c0_g1	yes	1
TRINITY_DN18138_c0_g1	yes	1
TRINITY_DN50694_c0_g2	yes	1
TRINITY_DN50694_c0_g1	yes	1
TRINITY_DN19878_c0_g1	yes	1
TRINITY_DN45028_c0_g1	yes	1
TRINITY_DN33750_c0_g1	yes	1
TRINITY_DN63502_c0_g1	yes	1
TRINITY_DN48044_c0_g4	yes	1
TRINITY_DN48564_c1_g2	yes	1
TRINITY_DN47396_c1_g1	yes	1
TRINITY_DN39596_c1_g1	yes	1
TRINITY_DN41687_c0_g2	yes	1
TRINITY_DN49579_c1_g2	yes	1
TRINITY_DN50765_c1_g4	yes	1
TRINITY_DN49579_c1_g1	yes	1
TRINITY_DN50765_c1_g1	yes	1
TRINITY_DN37785_c0_g1	yes	1
TRINITY_DN46174_c0_g2	yes	1
TRINITY_DN38633_c0_g1	yes	1
TRINITY_DN42845_c0_g2	yes	1
TRINITY_DN51989_c2_g1	yes	1
TRINITY_DN26426_c0_g1	yes	1
TRINITY_DN26470_c0_g1	yes	1
TRINITY_DN47107_c0_g1	yes	1
TRINITY_DN40149_c0_g1	yes	1
TRINITY_DN23118_c0_g1	yes	1
TRINITY_DN47558_c3_g1	yes	1
TRINITY_DN37794_c1_g1	yes	1
TRINITY_DN29685_c0_g1	yes	1
TRINITY_DN13685_c0_g1	yes	1
TRINITY_DN96469_c0_g1	yes	1
TRINITY_DN38191_c0_g1	yes	1
TRINITY_DN30334_c0_g1	yes	1
TRINITY_DN48470_c0_g1	yes	1
TRINITY_DN47152_c3_g3	yes	1
TRINITY_DN47152_c3_g2	yes	1
TRINITY_DN30667_c0_g1	yes	1
TRINITY_DN46606_c0_g1	yes	1
TRINITY_DN46370_c3_g1	yes	1
TRINITY_DN18551_c0_g1	yes	1
TRINITY_DN42254_c0_g1	yes	1
TRINITY_DN42254_c0_g2	yes	1
TRINITY_DN27437_c0_g1	yes	1
TRINITY_DN30325_c0_g1	yes	1
TRINITY_DN52133_c8_g4	yes	1
TRINITY_DN22911_c0_g1	yes	1
TRINITY_DN36690_c0_g1	yes	1
TRINITY_DN40278_c0_g1	yes	1
TRINITY_DN45013_c2_g1	yes	1
TRINITY_DN41561_c3_g3	yes	1
TRINITY_DN39606_c0_g2	yes	1
TRINITY_DN36126_c0_g1	yes	1
TRINITY_DN37061_c0_g1	yes	1
TRINITY_DN39143_c0_g1	yes	1
TRINITY_DN26002_c0_g1	yes	1
TRINITY_DN40182_c1_g1	yes	1
TRINITY_DN34720_c0_g1	yes	1
TRINITY_DN41173_c0_g1	yes	1
TRINITY_DN49576_c1_g2	yes	1
TRINITY_DN78870_c0_g1	yes	1
TRINITY_DN37723_c0_g1	yes	1
TRINITY_DN50245_c1_g1	yes	1
TRINITY_DN7698_c0_g1	yes	1
TRINITY_DN27768_c0_g1	yes	1
TRINITY_DN50037_c2_g1	yes	1
TRINITY_DN52505_c0_g1	yes	1
TRINITY_DN34632_c0_g2	yes	1
TRINITY_DN40702_c1_g1	yes	1
TRINITY_DN39597_c1_g1	yes	1
TRINITY_DN50200_c7_g1	yes	1
TRINITY_DN49916_c1_g2	yes	1
TRINITY_DN50200_c7_g3	yes	1
TRINITY_DN51525_c1_g1	yes	1
TRINITY_DN51649_c2_g2	yes	1
TRINITY_DN40399_c0_g1	yes	1
TRINITY_DN34676_c0_g1	yes	1
TRINITY_DN51226_c0_g3	yes	1
TRINITY_DN49755_c0_g1	yes	1
TRINITY_DN44483_c1_g1	yes	1
TRINITY_DN45114_c0_g1	yes	1
TRINITY_DN43478_c0_g1	yes	1
TRINITY_DN94893_c0_g1	yes	1
TRINITY_DN49608_c2_g1	yes	1
TRINITY_DN49608_c2_g3	yes	1
TRINITY_DN32133_c0_g1	yes	1
TRINITY_DN37614_c0_g1	yes	1
TRINITY_DN34202_c0_g1	yes	1
TRINITY_DN52405_c6_g5	yes	1
TRINITY_DN2881_c0_g1	yes	1
TRINITY_DN39572_c0_g1	yes	1
TRINITY_DN50561_c2_g2	yes	1
TRINITY_DN38698_c0_g1	yes	1
TRINITY_DN49937_c0_g2	yes	1
TRINITY_DN21849_c0_g1	yes	1
TRINITY_DN5356_c0_g1	yes	1
TRINITY_DN39975_c0_g1	yes	1
TRINITY_DN60166_c0_g1	yes	1
TRINITY_DN24334_c0_g1	yes	1
TRINITY_DN52095_c0_g1	yes	1
TRINITY_DN24826_c0_g1	yes	1
TRINITY_DN45189_c0_g2	yes	1
TRINITY_DN9791_c0_g1	yes	1
TRINITY_DN15608_c0_g1	yes	1
TRINITY_DN51517_c0_g1	yes	1
TRINITY_DN46157_c2_g2	yes	1
TRINITY_DN49230_c1_g2	yes	1
TRINITY_DN46157_c2_g1	yes	1
TRINITY_DN50982_c0_g1	yes	1
TRINITY_DN12307_c0_g1	yes	1
TRINITY_DN50982_c0_g2	yes	1
TRINITY_DN33769_c0_g1	yes	1
TRINITY_DN53091_c0_g1	yes	1
TRINITY_DN5484_c0_g1	yes	1
TRINITY_DN39613_c0_g1	yes	1
TRINITY_DN22078_c0_g1	yes	1
TRINITY_DN51756_c2_g1	yes	1
TRINITY_DN49337_c1_g1	yes	1
TRINITY_DN42906_c1_g1	yes	1
TRINITY_DN51207_c2_g1	yes	1
TRINITY_DN41876_c0_g2	yes	1
TRINITY_DN59186_c0_g1	yes	1
TRINITY_DN48957_c1_g1	yes	1
TRINITY_DN41876_c0_g4	yes	1
TRINITY_DN46142_c1_g1	yes	1
TRINITY_DN49929_c1_g1	yes	1
TRINITY_DN51570_c4_g1	yes	1
TRINITY_DN51824_c4_g2	yes	1
TRINITY_DN41163_c3_g7	yes	1
TRINITY_DN40676_c0_g1	yes	1
TRINITY_DN31903_c0_g1	yes	1
TRINITY_DN47320_c0_g1	yes	1
TRINITY_DN41163_c3_g3	yes	1
TRINITY_DN47903_c0_g1	yes	1
TRINITY_DN23403_c0_g1	yes	1
TRINITY_DN43773_c0_g1	yes	1
TRINITY_DN78226_c0_g1	yes	1
TRINITY_DN34434_c0_g1	yes	1
TRINITY_DN14220_c0_g1	yes	1
TRINITY_DN31482_c0_g1	yes	1
TRINITY_DN34150_c0_g1	yes	1
TRINITY_DN50190_c2_g2	yes	1
TRINITY_DN50622_c2_g3	yes	1
TRINITY_DN43383_c0_g2	yes	1
TRINITY_DN50190_c2_g1	yes	1
TRINITY_DN18018_c0_g1	yes	1
TRINITY_DN35559_c0_g1	yes	1
TRINITY_DN76862_c0_g1	yes	1
TRINITY_DN49917_c1_g3	yes	1
TRINITY_DN49917_c1_g1	yes	1
TRINITY_DN36288_c0_g1	yes	1
TRINITY_DN49241_c0_g1	yes	1
TRINITY_DN49192_c2_g1	yes	1
TRINITY_DN49285_c1_g1	yes	1
TRINITY_DN51484_c1_g1	yes	1
TRINITY_DN45630_c0_g2	yes	1
TRINITY_DN44712_c0_g1	yes	1
TRINITY_DN48646_c1_g1	yes	1
TRINITY_DN48661_c0_g1	yes	1
TRINITY_DN22480_c0_g1	yes	1
TRINITY_DN35346_c0_g1	yes	1
TRINITY_DN52183_c4_g5	yes	1
TRINITY_DN51868_c0_g1	yes	1
TRINITY_DN41689_c0_g1	yes	1
TRINITY_DN43017_c0_g1	yes	1
TRINITY_DN47610_c2_g1	yes	1
TRINITY_DN39636_c0_g1	yes	1
TRINITY_DN50841_c0_g3	yes	1
TRINITY_DN38282_c0_g1	yes	1
TRINITY_DN53395_c0_g1	yes	1
TRINITY_DN36898_c0_g1	yes	1
TRINITY_DN47955_c6_g2	yes	1
TRINITY_DN47955_c6_g1	yes	1
TRINITY_DN28108_c0_g1	yes	1
TRINITY_DN41197_c0_g1	yes	1
TRINITY_DN38806_c0_g1	yes	1
TRINITY_DN35123_c0_g1	yes	1
TRINITY_DN51733_c0_g3	yes	1
TRINITY_DN596_c1_g1	yes	1
TRINITY_DN21829_c0_g1	yes	1
TRINITY_DN44343_c1_g1	yes	1
TRINITY_DN88992_c0_g1	yes	1
TRINITY_DN46293_c1_g1	yes	1
TRINITY_DN52360_c0_g2	yes	1
TRINITY_DN46979_c0_g3	yes	1
TRINITY_DN40673_c0_g1	yes	1
TRINITY_DN43778_c0_g1	yes	1
TRINITY_DN51710_c0_g1	yes	1
TRINITY_DN28144_c0_g1	yes	1
TRINITY_DN49056_c0_g2	yes	1
TRINITY_DN27973_c1_g1	yes	1
TRINITY_DN48844_c0_g2	yes	1
TRINITY_DN97364_c0_g1	yes	1
TRINITY_DN34985_c0_g1	yes	1
TRINITY_DN36922_c0_g1	yes	1
TRINITY_DN43370_c0_g1	yes	1
TRINITY_DN52464_c3_g2	yes	1
TRINITY_DN21209_c0_g1	yes	1
TRINITY_DN42645_c1_g2	yes	1
TRINITY_DN8544_c0_g1	yes	1
TRINITY_DN3580_c0_g1	yes	1
TRINITY_DN657_c0_g1	yes	1
TRINITY_DN47422_c0_g1	yes	1
TRINITY_DN32894_c0_g1	yes	1
TRINITY_DN52218_c0_g4	yes	1
TRINITY_DN41338_c0_g1	yes	1
TRINITY_DN32520_c0_g1	yes	1
TRINITY_DN35476_c0_g1	yes	1
TRINITY_DN19103_c0_g1	yes	1
TRINITY_DN45337_c0_g2	yes	1
TRINITY_DN47195_c0_g2	yes	1
TRINITY_DN14522_c0_g1	yes	1
TRINITY_DN36787_c0_g1	yes	1
TRINITY_DN35679_c0_g1	yes	1
TRINITY_DN33786_c0_g2	yes	1
TRINITY_DN51942_c5_g1	yes	1
TRINITY_DN50082_c3_g4	yes	1
TRINITY_DN50082_c3_g7	yes	1
TRINITY_DN45592_c0_g1	yes	1
TRINITY_DN49075_c0_g2	yes	1
TRINITY_DN47344_c0_g1	yes	1
TRINITY_DN51993_c1_g1	yes	1
TRINITY_DN26005_c0_g1	yes	1
TRINITY_DN43495_c0_g1	yes	1
TRINITY_DN45483_c0_g1	yes	1
TRINITY_DN33313_c0_g1	yes	1
TRINITY_DN45427_c2_g1	yes	1
TRINITY_DN49200_c1_g1	yes	1
TRINITY_DN37059_c0_g1	yes	1
TRINITY_DN52503_c0_g1	yes	1
TRINITY_DN39094_c0_g1	yes	1
TRINITY_DN43556_c0_g1	yes	1
TRINITY_DN43620_c0_g1	yes	1
TRINITY_DN46004_c0_g1	yes	1
TRINITY_DN38685_c0_g1	yes	1
TRINITY_DN27338_c0_g1	yes	1
TRINITY_DN51862_c0_g1	yes	1
TRINITY_DN873_c0_g1	yes	1
TRINITY_DN45338_c2_g2	yes	1
TRINITY_DN72794_c0_g1	yes	1
TRINITY_DN51742_c1_g3	yes	1
TRINITY_DN51742_c1_g1	yes	1
TRINITY_DN47595_c1_g1	yes	1
TRINITY_DN58562_c0_g1	yes	1
TRINITY_DN85205_c0_g1	yes	1
TRINITY_DN51347_c1_g1	yes	1
TRINITY_DN77088_c0_g1	yes	1
TRINITY_DN51068_c1_g2	yes	1
TRINITY_DN37217_c0_g3	yes	1
TRINITY_DN37217_c0_g2	yes	1
TRINITY_DN37217_c0_g1	yes	1
TRINITY_DN33350_c0_g1	yes	1
TRINITY_DN27146_c0_g1	yes	1
TRINITY_DN28807_c0_g1	yes	1
TRINITY_DN29845_c0_g1	yes	1
TRINITY_DN49364_c2_g4	yes	1
TRINITY_DN63140_c0_g1	yes	1
TRINITY_DN37508_c0_g1	yes	1
TRINITY_DN48128_c1_g1	yes	1
TRINITY_DN40128_c0_g1	yes	1
TRINITY_DN47645_c0_g1	yes	1
TRINITY_DN22740_c0_g1	yes	1
TRINITY_DN77733_c0_g1	yes	1
TRINITY_DN89387_c0_g1	yes	1
TRINITY_DN31319_c0_g1	yes	1
TRINITY_DN51913_c0_g2	yes	1
TRINITY_DN69034_c0_g1	yes	1
TRINITY_DN41231_c0_g1	yes	1
TRINITY_DN33611_c0_g1	yes	1
TRINITY_DN30122_c0_g1	yes	1
TRINITY_DN92555_c0_g1	yes	1
TRINITY_DN6217_c0_g1	yes	1
TRINITY_DN50586_c1_g3	yes	1
TRINITY_DN528_c0_g1	yes	1
TRINITY_DN22850_c0_g1	yes	1
TRINITY_DN33190_c0_g1	yes	1
TRINITY_DN44784_c2_g1	yes	1
TRINITY_DN42563_c0_g1	yes	1
TRINITY_DN50619_c2_g1	yes	1
TRINITY_DN37304_c0_g2	yes	1
TRINITY_DN45148_c0_g1	yes	1
TRINITY_DN43255_c0_g1	yes	1
TRINITY_DN26424_c0_g1	yes	1
TRINITY_DN36808_c0_g1	yes	1
TRINITY_DN48930_c1_g4	yes	1
TRINITY_DN52164_c5_g1	yes	1
TRINITY_DN51712_c3_g1	yes	1
TRINITY_DN48930_c1_g1	yes	1
TRINITY_DN42266_c0_g1	yes	1
TRINITY_DN51658_c1_g1	yes	1
TRINITY_DN41988_c0_g1	yes	1
TRINITY_DN20591_c0_g1	yes	1
TRINITY_DN4331_c0_g1	yes	1
TRINITY_DN86129_c0_g1	yes	1
TRINITY_DN49396_c0_g1	yes	1
TRINITY_DN42618_c0_g1	yes	1
TRINITY_DN47905_c0_g2	yes	1
TRINITY_DN33648_c0_g1	yes	1
TRINITY_DN47905_c0_g1	yes	1
TRINITY_DN35177_c0_g1	yes	1
TRINITY_DN5932_c0_g1	yes	1
TRINITY_DN49264_c0_g3	yes	1
TRINITY_DN4168_c0_g1	yes	1
TRINITY_DN52062_c4_g1	yes	1
TRINITY_DN39484_c0_g1	yes	1
TRINITY_DN44948_c0_g2	yes	1
TRINITY_DN46038_c0_g1	yes	1
TRINITY_DN58275_c0_g1	yes	1
TRINITY_DN51123_c4_g1	yes	1
TRINITY_DN44067_c0_g1	yes	1
TRINITY_DN20694_c0_g1	yes	1
TRINITY_DN42039_c0_g2	yes	1
TRINITY_DN49683_c0_g1	yes	1
TRINITY_DN8570_c0_g1	yes	1
TRINITY_DN35894_c0_g1	yes	1
TRINITY_DN39976_c0_g1	yes	1
TRINITY_DN47150_c1_g1	yes	1
TRINITY_DN31189_c0_g1	yes	1
TRINITY_DN51890_c11_g1	yes	1
TRINITY_DN28093_c0_g1	yes	1
TRINITY_DN46030_c2_g1	yes	1
TRINITY_DN43651_c0_g1	yes	1
TRINITY_DN50998_c0_g1	yes	1
TRINITY_DN50881_c1_g2	yes	1
TRINITY_DN45221_c0_g1	yes	1
TRINITY_DN51103_c0_g2	yes	1
TRINITY_DN33751_c0_g1	yes	1
TRINITY_DN48962_c0_g1	yes	1
TRINITY_DN78325_c0_g1	yes	1
TRINITY_DN29005_c0_g1	yes	1
TRINITY_DN52132_c2_g1	yes	1
TRINITY_DN28251_c0_g1	yes	1
TRINITY_DN40604_c0_g4	yes	1
TRINITY_DN41603_c0_g1	yes	1
TRINITY_DN52109_c0_g1	yes	1
TRINITY_DN40604_c0_g3	yes	1
TRINITY_DN40604_c0_g2	yes	1
TRINITY_DN41088_c0_g1	yes	1
[truncated: 84,810 more rows]
