# Supplementary material for: Transcriptomic analysis reveals key genes related to antioxidant mechanisms of Hylocereus undatus quality improvement by trypsin during storage
Source: Royal Society of Chemistry journal article supplement (doi:10.1039/c9fo00809h), 2019-01-01
Supplement: c9fo00809h11.xlsx [file c9fo00809h11.xlsx]

## Sheet: sheet1
Gene_id	Length	GO_id	GO_term	KO_id	KO_name	Pathway_id	Pathway_definition	COG_id	COG_Functional Categories	NOG_id	NOG_Functional Categories	NR_hit-name	NR_description	Swiss-Prot_hit-name	Swiss-Prot_description	Pfam_id	Domain	Domain description
TRINITY_DN15252_c0_g1	420	GO:0030001; GO:0006801; GO:0006888; GO:0006886; GO:0016021; GO:0030127; GO:0016021;GO:0046872; GO:0005506; GO:0031418; GO:0016705; GO:0008270;	BP:metal ion transport;BP:superoxide metabolic process;BP:ER to Golgi vesicle-mediated transport;BP:intracellular protein transport;CC:integral component of membrane;CC:COPII vesicle coat;CC:integral component of membrane;MF:metal ion binding;MF:iron ion binding;MF:L-ascorbic acid binding;MF:oxidoreductase activity, acting on paired donors, with incorporation or reduction of molecular oxygen;MF:z…	------	------	------	------	------	------	------	------	PHU28306.1;	Copper chaperone for superoxide dismutase, chloroplastic/cytosolic [Capsicum chinense];	------	------	------	------	------
TRINITY_DN27926_c0_g1	255	------	------	K00430	E1.11.1.7	map00940;	Phenylpropanoid biosynthesis;	------	------	------	------	XP_010681206.1;	PREDICTED: peroxidase 12 [Beta vulgaris subsp. vulgaris];	gi|378405200|sp|P84516.2|PER1_SORBI;	RecName: Full=Cationic peroxidase SPC4; Flags: Precursor;	PF00141.20;	peroxidase;	Peroxidase;
TRINITY_DN29305_c0_g1	497	GO:0042744; GO:0006979; GO:0005576;GO:0020037; GO:0046872; GO:0004601;	BP:hydrogen peroxide catabolic process;BP:response to oxidative stress;CC:extracellular region;MF:heme binding;MF:metal ion binding;MF:peroxidase activity;	K00430	E1.11.1.7	map00940;	Phenylpropanoid biosynthesis;	------	------	------	------	XP_010681225.1;	PREDICTED: peroxidase 12 [Beta vulgaris subsp. vulgaris];	gi|25453205|sp|Q96520.1|PER12_ARATH;	RecName: Full=Peroxidase 12; Short=Atperox P12; AltName: Full=ATP4a; AltName: Full=PRXR6; Flags: Precursor;	PF00141.20;	peroxidase;	Peroxidase;
TRINITY_DN30823_c0_g1	1172	------	------	K00430	E1.11.1.7	map00940;	Phenylpropanoid biosynthesis;	------	------	------	------	XP_021862527.1;	peroxidase 29 [Spinacia oleracea];	gi|25453211|sp|Q9LSP0.2|PER29_ARATH;	RecName: Full=Peroxidase 29; Short=Atperox P29; AltName: Full=ATP40; Flags: Precursor;	PF00141.20;	peroxidase;	Peroxidase;
TRINITY_DN35728_c0_g1	974	GO:0045454; GO:0009543;GO:0004601; GO:0051920; GO:0016209; GO:0016491;	BP:cell redox homeostasis;CC:chloroplast thylakoid lumen;MF:peroxidase activity;MF:peroxiredoxin activity;MF:antioxidant activity;MF:oxidoreductase activity;	K03564	BCP, PRXQ, DOT5	------	------	------	------	------	------	Q6UBI3.1; AltName: Full=Thioredoxin peroxidase; Flags: Precursor);	RecName: Full=Peroxiredoxin Q, chloroplasti;;;	gi|75324751|sp|Q6UBI3.1|PERQ_SUASA;	RecName: Full=Peroxiredoxin Q, chloroplastic; AltName: Full=Thioredoxin reductase; Flags: Precursor;	PF00578.18; PF08534.7;	AhpC-TSA;Redoxin;	AhpC/TSA family;Redoxin;
TRINITY_DN40490_c0_g2	704	------	------	------	------	------	------	------	------	------	------	XP_010678865.1;	PREDICTED: protein OVEREXPRESSOR OF CATIONIC PEROXIDASE 3 [Beta vulgaris subsp. vulgaris];	------	------	PF15243.3;	ANAPC15;	Anaphase-promoting complex subunit 15;
TRINITY_DN41933_c0_g1	1321	------	------	K00430	E1.11.1.7	map00940;	Phenylpropanoid biosynthesis;	------	------	------	------	XP_021766343.1;	cationic peroxidase 1-like [Chenopodium quinoa];	gi|6093671|sp|P22195.2|PER1_ARAHY;	RecName: Full=Cationic peroxidase 1; AltName: Full=PNPC1; Flags: Precursor;	PF00141.20;	peroxidase;	Peroxidase;
TRINITY_DN45160_c0_g1	3086	GO:0006979;GO:0020037; GO:0004601;	BP:response to oxidative stress;MF:heme binding;MF:peroxidase activity;	K00434	E1.11.1.11	map00480; map00053;	Glutathione metabolism;Ascorbate and aldarate metabolism;	COG0376;	P:Inorganic ion transport and metabolism;	------	------	XP_010689420.1;	PREDICTED: L-ascorbate peroxidase, cytosolic [Beta vulgaris subsp. vulgaris];	gi|1351963|sp|P48534.2|APX1_PEA;	RecName: Full=L-ascorbate peroxidase, cytosolic; Short=AP; AltName: Full=PsAPx01;	PF00141.20;	peroxidase;	Peroxidase;
TRINITY_DN47181_c0_g1	2370	------	------	K00430	E1.11.1.7	map00940;	Phenylpropanoid biosynthesis;	------	------	------	------	XP_021728860.1;	peroxidase N-like [Chenopodium quinoa];	gi|26398017|sp|Q42517.1|PERN_ARMRU;	RecName: Full=Peroxidase N; AltName: Full=Neutral peroxidase; Flags: Precursor;	PF00141.20;	peroxidase;	Peroxidase;
TRINITY_DN47652_c0_g1	1602	GO:0006979; GO:0006979; GO:0006979; GO:0016021; GO:0009507; GO:0016021;GO:0020037; GO:0016688; GO:0020037; GO:0016688; GO:0020037; GO:0004601;	BP:response to oxidative stress;BP:response to oxidative stress;BP:response to oxidative stress;CC:integral component of membrane;CC:chloroplast;CC:integral component of membrane;MF:heme binding;MF:L-ascorbate peroxidase activity;MF:heme binding;MF:L-ascorbate peroxidase activity;MF:heme binding;MF:peroxidase activity;	K00434	E1.11.1.11	map00480; map00053;	Glutathione metabolism;Ascorbate and aldarate metabolism;	COG0376;	P:Inorganic ion transport and metabolism;	------	------	XP_010674949.1;	PREDICTED: probable L-ascorbate peroxidase 6, chloroplastic isoform X1 [Beta vulgaris subsp. vulgaris];	gi|118572830|sp|Q42592.2|APXS_ARATH;	RecName: Full=L-ascorbate peroxidase S, chloroplastic/mitochondrial; AltName: Full=Stromal ascorbate peroxidase; Short=AtAPx05; Short=sAPX; Flags: Precursor;	PF00141.20;	peroxidase;	Peroxidase;
TRINITY_DN6894_c0_g1	690	------	------	K00430	E1.11.1.7	map00940;	Phenylpropanoid biosynthesis;	------	------	NOG130945; NOG124136;	G:Carbohydrate transport and metabolism;	XP_021769293.1;	peroxidase P7-like [Chenopodium quinoa];	gi|223635590|sp|A7NY33.1|PER4_VITVI;	RecName: Full=Peroxidase 4; Flags: Precursor;	PF00141.20;	peroxidase;	Peroxidase;
TRINITY_DN70711_c0_g1	356	GO:0046872; GO:0004784; GO:0046872; GO:0004784; GO:0046872; GO:0004784; GO:0046872; GO:0004784; GO:0046872; GO:0004784;	MF:metal ion binding;MF:superoxide dismutase activity;MF:metal ion binding;MF:superoxide dismutase activity;MF:metal ion binding;MF:superoxide dismutase activity;MF:metal ion binding;MF:superoxide dismutase activity;MF:metal ion binding;MF:superoxide dismutase activity;	K04564	SOD2	map04146;	Peroxisome;	COG0605;	P:Inorganic ion transport and metabolism;	------	------	CAZ52764.1;	putative manganese superoxide dismutase protein, partial [Tetraselmis suecica];	gi|38503339|sp|Q8HXP7.2|SODM_PANTR;	RecName: Full=Superoxide dismutase [Mn], mitochondrial;	PF02777.15; PF00081.19;	Sod_Fe_C;Sod_Fe_N;	Iron/manganese superoxide dismutases, C-terminal domain;Iron/manganese superoxide dismutases, alpha-hairpin domain;
TRINITY_DN90129_c0_g1	602	GO:0046872; GO:0004784; GO:0046872; GO:0004784; GO:0046872; GO:0004784; GO:0046872; GO:0004784;	MF:metal ion binding;MF:superoxide dismutase activity;MF:metal ion binding;MF:superoxide dismutase activity;MF:metal ion binding;MF:superoxide dismutase activity;MF:metal ion binding;MF:superoxide dismutase activity;	K04565	SOD1	map04146;	Peroxisome;	COG2032;	P:Inorganic ion transport and metabolism;	------	------	AQU42894.1;	copper and zinc superoxide dismutase [Zoysia japonica];	gi|134611|sp|P00441.2|SODC_HUMAN;	RecName: Full=Superoxide dismutase [Cu-Zn]; AltName: Full=Superoxide dismutase 1; Short=hSod1 >gi|38503278|sp|P60052.2|SODC_PANTR RecName: Full=Superoxide dismutase [Cu-Zn];	PF00080.17;	Sod_Cu;	Copper/zinc superoxide dismutase;
TRINITY_DN98654_c0_g1	296	------	------	------	------	------	------	------	------	------	------	XP_022775360.1;	peroxidase 72-like isoform X2 [Durio zibethinus];	gi|26397792|sp|Q9FJZ9.1|PER72_ARATH;	RecName: Full=Peroxidase 72; Short=Atperox P72; AltName: Full=ATP6a; AltName: Full=PRXR8; Flags: Precursor;	------	------	------
TRINITY_DN99006_c0_g1	386	GO:0042744; GO:0006979; GO:0005576;GO:0020037; GO:0046872; GO:0004601;	BP:hydrogen peroxide catabolic process;BP:response to oxidative stress;CC:extracellular region;MF:heme binding;MF:metal ion binding;MF:peroxidase activity;	K00430	E1.11.1.7	map00940;	Phenylpropanoid biosynthesis;	------	------	------	------	XP_021758315.1;	peroxidase 9-like [Chenopodium quinoa];	gi|25453202|sp|Q96512.1|PER9_ARATH;	RecName: Full=Peroxidase 9; Short=Atperox P9; AltName: Full=ATP18a; Flags: Precursor;	PF00141.20;	peroxidase;	Peroxidase;
TRINITY_DN14459_c0_g1	461	GO:0042744; GO:0006979; GO:0005576; GO:0016021;GO:0020037; GO:0046872; GO:0004601;	BP:hydrogen peroxide catabolic process;BP:response to oxidative stress;CC:extracellular region;CC:integral component of membrane;MF:heme binding;MF:metal ion binding;MF:peroxidase activity;	K00430	E1.11.1.7	map00940;	Phenylpropanoid biosynthesis;	------	------	------	------	XP_021719411.1;	peroxidase 29-like [Chenopodium quinoa];	gi|25453211|sp|Q9LSP0.2|PER29_ARATH;	RecName: Full=Peroxidase 29; Short=Atperox P29; AltName: Full=ATP40; Flags: Precursor;	PF00141.20;	peroxidase;	Peroxidase;
TRINITY_DN20653_c0_g1	857	GO:0042744; GO:0006979; GO:0042744; GO:0006979; GO:0005576; GO:0005576;GO:0020037; GO:0046872; GO:0004601; GO:0020037; GO:0046872; GO:0004601;	BP:hydrogen peroxide catabolic process;BP:response to oxidative stress;BP:hydrogen peroxide catabolic process;BP:response to oxidative stress;CC:extracellular region;CC:extracellular region;MF:heme binding;MF:metal ion binding;MF:peroxidase activity;MF:heme binding;MF:metal ion binding;MF:peroxidase activity;	K00430	E1.11.1.7	map00940;	Phenylpropanoid biosynthesis;	------	------	NOG33768;	G:Carbohydrate transport and metabolism;	XP_021719706.1;	peroxidase 42 [Chenopodium quinoa];	gi|26397890|sp|Q9SB81.2|PER42_ARATH;	RecName: Full=Peroxidase 42; Short=Atperox P42; AltName: Full=ATP1a/ATP1b; AltName: Full=PRXR1; Flags: Precursor;	PF00141.20;	peroxidase;	Peroxidase;
TRINITY_DN23107_c0_g1	814	GO:0042744; GO:0006979; GO:0005576;GO:0020037; GO:0046872; GO:0004601;	BP:hydrogen peroxide catabolic process;BP:response to oxidative stress;CC:extracellular region;MF:heme binding;MF:metal ion binding;MF:peroxidase activity;	K00430	E1.11.1.7	map00940;	Phenylpropanoid biosynthesis;	------	------	------	------	XP_021719706.1;	peroxidase 42 [Chenopodium quinoa];	gi|26397890|sp|Q9SB81.2|PER42_ARATH;	RecName: Full=Peroxidase 42; Short=Atperox P42; AltName: Full=ATP1a/ATP1b; AltName: Full=PRXR1; Flags: Precursor;	PF00141.20;	peroxidase;	Peroxidase;
TRINITY_DN23201_c0_g1	1260	GO:0042744; GO:0006979; GO:0005576;GO:0020037; GO:0046872; GO:0004601;	BP:hydrogen peroxide catabolic process;BP:response to oxidative stress;CC:extracellular region;MF:heme binding;MF:metal ion binding;MF:peroxidase activity;	K00430	E1.11.1.7	map00940;	Phenylpropanoid biosynthesis;	------	------	------	------	XP_021836083.1;	peroxidase 5-like isoform X1 [Spinacia oleracea];	gi|300669658|sp|A7QEU4.2|PER5_VITVI;	RecName: Full=Peroxidase 5; Flags: Precursor;	PF00141.20;	peroxidase;	Peroxidase;
TRINITY_DN25499_c0_g1	205	GO:0046872; GO:0004784;	MF:metal ion binding;MF:superoxide dismutase activity;	K04565	SOD1	map04146;	Peroxisome;	------	------	------	------	XP_023886042.1;	superoxide dismutase [Cu-Zn] [Quercus suber];	gi|122064579|sp|P83684.2|SODC_HUMLT;	RecName: Full=Superoxide dismutase [Cu-Zn]; AltName: Full=HlSOD;	PF00080.17;	Sod_Cu;	Copper/zinc superoxide dismutase;
TRINITY_DN27752_c0_g1	1252	GO:0042744; GO:0006979; GO:0005576;GO:0020037; GO:0046872; GO:0004601;	BP:hydrogen peroxide catabolic process;BP:response to oxidative stress;CC:extracellular region;MF:heme binding;MF:metal ion binding;MF:peroxidase activity;	K00430	E1.11.1.7	map00940;	Phenylpropanoid biosynthesis;	------	------	------	------	XP_010685987.1;	PREDICTED: peroxidase 57 [Beta vulgaris subsp. vulgaris];	gi|26397647|sp|Q43729.1|PER57_ARATH;	RecName: Full=Peroxidase 57; Short=Atperox P57; AltName: Full=ATP13a; AltName: Full=PRXR10; Flags: Precursor;	PF00141.20;	peroxidase;	Peroxidase;
TRINITY_DN2888_c0_g1	548	GO:0042744; GO:0006979;GO:0020037; GO:0046872; GO:0004601;	BP:hydrogen peroxide catabolic process;BP:response to oxidative stress;MF:heme binding;MF:metal ion binding;MF:peroxidase activity;	K00430	E1.11.1.7	map00940;	Phenylpropanoid biosynthesis;	------	------	------	------	XP_021860242.1;	peroxidase 57-like [Spinacia oleracea];	gi|75315324|sp|Q9XIV8.1|PERN1_TOBAC;	RecName: Full=Peroxidase N1; AltName: Full=Peroxidase B2; AltName: Full=Peroxidase B3; Flags: Precursor [Nicotiana tabacum];	PF00141.20;	peroxidase;	Peroxidase;
TRINITY_DN38461_c0_g1	1005	GO:0042744; GO:0006979; GO:0005576;GO:0020037; GO:0046872; GO:0004601;	BP:hydrogen peroxide catabolic process;BP:response to oxidative stress;CC:extracellular region;MF:heme binding;MF:metal ion binding;MF:peroxidase activity;	K00430	E1.11.1.7	map00940;	Phenylpropanoid biosynthesis;	------	------	------	------	XP_010677294.1;	PREDICTED: peroxidase 20 [Beta vulgaris subsp. vulgaris];	gi|25453219|sp|Q9SLH7.1|PER20_ARATH;	RecName: Full=Peroxidase 20; Short=Atperox P20; AltName: Full=ATP28a; Flags: Precursor;	PF00141.20;	peroxidase;	Peroxidase;
TRINITY_DN38638_c0_g1	1122	GO:0045454; GO:0005623;GO:0016209; GO:0016491;	BP:cell redox homeostasis;CC:cell;MF:antioxidant activity;MF:oxidoreductase activity;	K03564	BCP, PRXQ, DOT5	------	------	------	------	------	------	XP_021756717.1;	peroxiredoxin Q, chloroplastic-like [Chenopodium quinoa];	gi|75324751|sp|Q6UBI3.1|PERQ_SUASA;	RecName: Full=Peroxiredoxin Q, chloroplastic; AltName: Full=Thioredoxin reductase; Flags: Precursor;	------	------	------
TRINITY_DN38788_c0_g1	1187	GO:0006979;GO:0004602;	BP:response to oxidative stress;MF:glutathione peroxidase activity;	K00432	gpx	map00590; map00480;	Arachidonic acid metabolism;Glutathione metabolism;	COG0386;	O:Posttranslational modification, protein turnover, chaperones;	------	------	XP_010670824.1;	PREDICTED: probable phospholipid hydroperoxide glutathione peroxidase [Beta vulgaris subsp. vulgaris];	gi|20141398|sp|P52032.2|GPX1_ARATH;	RecName: Full=Phospholipid hydroperoxide glutathione peroxidase 1, chloroplastic; Short=PHGPx; Flags: Precursor;	PF00255.16; PF00578.18; PF08534.7;	GSHPx;AhpC-TSA;Redoxin;	Glutathione peroxidase;AhpC/TSA family;Redoxin;
TRINITY_DN39090_c0_g1	863	GO:0042744; GO:0006979; GO:0005576; GO:0016021;GO:0020037; GO:0046872; GO:0004601;	BP:hydrogen peroxide catabolic process;BP:response to oxidative stress;CC:extracellular region;CC:integral component of membrane;MF:heme binding;MF:metal ion binding;MF:peroxidase activity;	K00430	E1.11.1.7	map00940;	Phenylpropanoid biosynthesis;	------	------	------	------	XP_010692957.1;	PREDICTED: peroxidase 46 [Beta vulgaris subsp. vulgaris];	gi|25453218|sp|Q9SK52.1|PER18_ARATH;	RecName: Full=Peroxidase 18; Short=Atperox P18; Flags: Precursor;	PF00141.20;	peroxidase;	Peroxidase;
TRINITY_DN39313_c0_g1	1164	GO:0042744; GO:0006979; GO:0042744; GO:0006979; GO:0005576; GO:0005576;GO:0020037; GO:0046872; GO:0004601; GO:0020037; GO:0046872; GO:0004601;	BP:hydrogen peroxide catabolic process;BP:response to oxidative stress;BP:hydrogen peroxide catabolic process;BP:response to oxidative stress;CC:extracellular region;CC:extracellular region;MF:heme binding;MF:metal ion binding;MF:peroxidase activity;MF:heme binding;MF:metal ion binding;MF:peroxidase activity;	K00430	E1.11.1.7	map00940;	Phenylpropanoid biosynthesis;	------	------	------	------	XP_010041692.2;	PREDICTED: peroxidase 5 [Eucalyptus grandis];	gi|300669658|sp|A7QEU4.2|PER5_VITVI;	RecName: Full=Peroxidase 5; Flags: Precursor;	PF00141.20;	peroxidase;	Peroxidase;
TRINITY_DN39475_c0_g2	1171	GO:0042744; GO:0006979; GO:0042744; GO:0006979; GO:0042744; GO:0006979; GO:0005576; GO:0005576; GO:0005576;GO:0020037; GO:0046872; GO:0004601; GO:0020037; GO:0046872; GO:0004601; GO:0020037; GO:0046872; GO:0004601;	BP:hydrogen peroxide catabolic process;BP:response to oxidative stress;BP:hydrogen peroxide catabolic process;BP:response to oxidative stress;BP:hydrogen peroxide catabolic process;BP:response to oxidative stress;CC:extracellular region;CC:extracellular region;CC:extracellular region;MF:heme binding;MF:metal ion binding;MF:peroxidase activity;MF:heme binding;MF:metal ion binding;MF:peroxidase act…	K00430	E1.11.1.7	map00940;	Phenylpropanoid biosynthesis;	------	------	NOG123237;	G:Carbohydrate transport and metabolism;	XP_002521512.1;	PREDICTED: peroxidase 72 [Ricinus communis];	gi|26397792|sp|Q9FJZ9.1|PER72_ARATH;	RecName: Full=Peroxidase 72; Short=Atperox P72; AltName: Full=ATP6a; AltName: Full=PRXR8; Flags: Precursor;	PF00141.20;	peroxidase;	Peroxidase;
TRINITY_DN40637_c0_g1	1760	GO:0042744; GO:0006979; GO:0005576;GO:0020037; GO:0046872; GO:0004601;	BP:hydrogen peroxide catabolic process;BP:response to oxidative stress;CC:extracellular region;MF:heme binding;MF:metal ion binding;MF:peroxidase activity;	K00430	E1.11.1.7	map00940;	Phenylpropanoid biosynthesis;	------	------	------	------	XP_021732934.1;	peroxidase P7-like [Chenopodium quinoa];	gi|223635590|sp|A7NY33.1|PER4_VITVI;	RecName: Full=Peroxidase 4; Flags: Precursor;	PF00141.20;	peroxidase;	Peroxidase;
TRINITY_DN41526_c1_g1	1235	------	------	K00430	E1.11.1.7	map00940;	Phenylpropanoid biosynthesis;	------	------	------	------	XP_021718278.1;	peroxidase 57-like [Chenopodium quinoa];	gi|26397719|sp|Q93V93.1|PER44_ARATH;	RecName: Full=Peroxidase 44; Short=Atperox P44; AltName: Full=ATP35; Flags: Precursor;	PF00141.20;	peroxidase;	Peroxidase;
TRINITY_DN41551_c0_g1	1549	GO:0034599; GO:0042744; GO:0000302; GO:0009845; GO:0010431; GO:0005829;GO:0004130; GO:0020037;	BP:cellular response to oxidative stress;BP:hydrogen peroxide catabolic process;BP:response to reactive oxygen species;BP:seed germination;BP:seed maturation;CC:cytosol;MF:cytochrome-c peroxidase activity;MF:heme binding;	K00434	E1.11.1.11	map00480; map00053;	Glutathione metabolism;Ascorbate and aldarate metabolism;	------	------	------	------	XP_021738555.1;	putative L-ascorbate peroxidase 6 [Chenopodium quinoa];	gi|75244424|sp|Q8GY91.1|APX6_ARATH;	RecName: Full=Putative L-ascorbate peroxidase 6; Short=AtAPx08;	PF00141.20;	peroxidase;	Peroxidase;
TRINITY_DN41723_c0_g1	1336	GO:0042744; GO:0006979; GO:0005576;GO:0020037; GO:0046872; GO:0004601;	BP:hydrogen peroxide catabolic process;BP:response to oxidative stress;CC:extracellular region;MF:heme binding;MF:metal ion binding;MF:peroxidase activity;	K00430	E1.11.1.7	map00940;	Phenylpropanoid biosynthesis;	------	------	------	------	XP_021838020.1;	peroxidase 60-like [Spinacia oleracea];	gi|129808|sp|P22196.1|PER2_ARAHY;	RecName: Full=Cationic peroxidase 2; AltName: Full=PNPC2; Flags: Precursor [Arachis hypogaea];	PF00141.20;	peroxidase;	Peroxidase;
TRINITY_DN43553_c0_g1	2279	GO:0042744; GO:0006979; GO:0005576;GO:0020037; GO:0046872; GO:0004601;	BP:hydrogen peroxide catabolic process;BP:response to oxidative stress;CC:extracellular region;MF:heme binding;MF:metal ion binding;MF:peroxidase activity;	K00430	E1.11.1.7	map00940;	Phenylpropanoid biosynthesis;	------	------	------	------	XP_010681313.1;	PREDICTED: peroxidase 11 [Beta vulgaris subsp. vulgaris];	gi|25453204|sp|Q96519.1|PER11_ARATH;	RecName: Full=Peroxidase 11; Short=Atperox P11; AltName: Full=ATP23a/ATP23b; Flags: Precursor;	PF00141.20;	peroxidase;	Peroxidase;
TRINITY_DN45999_c1_g2	1859	GO:0005634;GO:0003677;	CC:nucleus;MF:DNA binding;	------	------	------	------	------	------	------	------	XP_021737964.1;	protein OVEREXPRESSOR OF CATIONIC PEROXIDASE 3-like [Chenopodium quinoa];	gi|75244585|sp|Q8H0V5.1|OCP3_ARATH;	RecName: Full=Protein OVEREXPRESSOR OF CATIONIC PEROXIDASE 3;	PF00046.26;	Homeobox;	Homeobox domain;
TRINITY_DN47307_c0_g1	2634	------	------	K00430	E1.11.1.7	map00940;	Phenylpropanoid biosynthesis;	------	------	NOG129978;	G:Carbohydrate transport and metabolism;	XP_021728230.1;	peroxidase 64-like [Chenopodium quinoa];	gi|26397658|sp|Q43872.1|PER64_ARATH;	RecName: Full=Peroxidase 64; Short=Atperox P64; AltName: Full=ATP17a; AltName: Full=PRXR4; Flags: Precursor;	PF00141.20;	peroxidase;	Peroxidase;
TRINITY_DN47343_c0_g1	1774	GO:0006979; GO:0006979; GO:0006979; GO:0016021; GO:0016021; GO:0016021;GO:0020037; GO:0004601; GO:0020037; GO:0004601; GO:0020037; GO:0004601;	BP:response to oxidative stress;BP:response to oxidative stress;BP:response to oxidative stress;CC:integral component of membrane;CC:integral component of membrane;CC:integral component of membrane;MF:heme binding;MF:peroxidase activity;MF:heme binding;MF:peroxidase activity;MF:heme binding;MF:peroxidase activity;	K00434	E1.11.1.11	map00480; map00053;	Glutathione metabolism;Ascorbate and aldarate metabolism;	------	------	------	------	AAD30294.1;	cytosolic ascorbate peroxidase [Mesembryanthemum crystallinum];	gi|75221319|sp|Q42564.1|APX3_ARATH;	RecName: Full=L-ascorbate peroxidase 3, peroxisomal; Short=AtAPx03; Flags: Precursor;	PF00141.20;	peroxidase;	Peroxidase;
TRINITY_DN48395_c0_g1	681	------	------	K00430	E1.11.1.7	map00940;	Phenylpropanoid biosynthesis;	------	------	NOG130945;	G:Carbohydrate transport and metabolism;	XP_021769298.1;	peroxidase 4-like [Chenopodium quinoa];	gi|223635590|sp|A7NY33.1|PER4_VITVI;	RecName: Full=Peroxidase 4; Flags: Precursor;	PF00141.20;	peroxidase;	Peroxidase;
TRINITY_DN50446_c0_g1	1494	GO:0046872; GO:0004784; GO:0046872; GO:0004784;	MF:metal ion binding;MF:superoxide dismutase activity;MF:metal ion binding;MF:superoxide dismutase activity;	K04564	SOD2	map04146;	Peroxisome;	------	------	------	------	XP_021744707.1;	superoxide dismutase [Fe], chloroplastic-like isoform X2 [Chenopodium quinoa];	gi|134646|sp|P28759.1|SODF_SOYBN;	RecName: Full=Superoxide dismutase [Fe], chloroplastic; Flags: Precursor;	PF02777.15; PF00081.19;	Sod_Fe_C;Sod_Fe_N;	Iron/manganese superoxide dismutases, C-terminal domain;Iron/manganese superoxide dismutases, alpha-hairpin domain;
TRINITY_DN52064_c6_g1	1120	GO:0042744; GO:0006979; GO:0005576;GO:0020037; GO:0046872; GO:0004601;	BP:hydrogen peroxide catabolic process;BP:response to oxidative stress;CC:extracellular region;MF:heme binding;MF:metal ion binding;MF:peroxidase activity;	K00430	E1.11.1.7	map00940;	Phenylpropanoid biosynthesis;	------	------	NOG131641;	G:Carbohydrate transport and metabolism;	XP_010687995.1;	PREDICTED: peroxidase 25 [Beta vulgaris subsp. vulgaris];	gi|25453194|sp|O80822.2|PER25_ARATH;	RecName: Full=Peroxidase 25; Short=Atperox P25; Flags: Precursor;	PF00141.20;	peroxidase;	Peroxidase;
TRINITY_DN52071_c2_g3	2304	GO:0042744; GO:0006979; GO:0042744; GO:0006979;GO:0004096; GO:0020037; GO:0046872; GO:0004096; GO:0020037; GO:0046872;	BP:hydrogen peroxide catabolic process;BP:response to oxidative stress;BP:hydrogen peroxide catabolic process;BP:response to oxidative stress;MF:catalase activity;MF:heme binding;MF:metal ion binding;MF:catalase activity;MF:heme binding;MF:metal ion binding;	K03781	katE, CAT, catB, srpA	map00630; map04016; map00380; map04146;	Glyoxylate and dicarboxylate metabolism;MAPK signaling pathway - plant;Tryptophan metabolism;Peroxisome;	COG0753;	P:Inorganic ion transport and metabolism;	------	------	AAC19397.1;	leaf catalase [Mesembryanthemum crystallinum];	gi|1345684|sp|P49317.1|CATA3_NICPL;	RecName: Full=Catalase isozyme 3 [Nicotiana plumbaginifolia];	PF00199.16; PF06628.9;	Catalase;Catalase-rel;	Catalase;Catalase-related immune-responsive;
TRINITY_DN52418_c1_g2	521	------	------	------	------	------	------	------	------	------	------	XP_021852113.1;	peroxidase 17-like [Spinacia oleracea];	------	------	------	------	------
TRINITY_DN52532_c3_g1	1066	------	------	------	------	------	------	------	------	------	------	XP_021852113.1;	peroxidase 17-like [Spinacia oleracea];	------	------	------	------	------
TRINITY_DN52859_c0_g1	374	GO:0042744; GO:0006979; GO:0042744; GO:0006979; GO:0042744; GO:0006979; GO:0005576; GO:0005737;GO:0020037; GO:0046872; GO:0004601; GO:0051500; GO:0020037; GO:0046872; GO:0004601; GO:0000049; GO:0020037; GO:0046872; GO:0004601;	BP:hydrogen peroxide catabolic process;BP:response to oxidative stress;BP:hydrogen peroxide catabolic process;BP:response to oxidative stress;BP:hydrogen peroxide catabolic process;BP:response to oxidative stress;CC:extracellular region;CC:cytoplasm;MF:heme binding;MF:metal ion binding;MF:peroxidase activity;MF:D-tyrosyl-tRN;MF:heme binding;MF:metal ion binding;MF:peroxidase activity;MF:tRNA bind…	K00430	E1.11.1.7	map00940;	Phenylpropanoid biosynthesis;	------	------	------	------	XP_016461332.1;	PREDICTED: peroxidase 19-like [Nicotiana tabacum];	gi|25453189|sp|O22959.1|PER19_ARATH;	RecName: Full=Peroxidase 19; Short=Atperox P19; AltName: Full=ATP51; Flags: Precursor;	------	------	------
TRINITY_DN61841_c0_g1	399	GO:0042744; GO:0006979; GO:0042744; GO:0006979; GO:0042744; GO:0006979; GO:0005576; GO:0005576;GO:0020037; GO:0046872; GO:0004601; GO:0020037; GO:0046872; GO:0004601; GO:0020037; GO:0046872; GO:0004601;	BP:hydrogen peroxide catabolic process;BP:response to oxidative stress;BP:hydrogen peroxide catabolic process;BP:response to oxidative stress;BP:hydrogen peroxide catabolic process;BP:response to oxidative stress;CC:extracellular region;CC:extracellular region;MF:heme binding;MF:metal ion binding;MF:peroxidase activity;MF:heme binding;MF:metal ion binding;MF:peroxidase activity;MF:heme binding;MF…	K00430	E1.11.1.7	map00940;	Phenylpropanoid biosynthesis;	------	------	------	------	XP_010261059.1;	PREDICTED: cationic peroxidase 1-like isoform X1 [Nelumbo nucifera];	gi|26397863|sp|Q9LVL1.1|PER68_ARATH;	RecName: Full=Peroxidase 68; Short=Atperox P68; Flags: Precursor;	PF00141.20;	peroxidase;	Peroxidase;
TRINITY_DN69399_c0_g1	220	GO:0042744; GO:0006979; GO:0006979; GO:0006979; GO:0006979;GO:0004096; GO:0020037; GO:0046872; GO:0004096; GO:0020037; GO:0004096; GO:0020037; GO:0046872; GO:0004096; GO:0020037;	BP:hydrogen peroxide catabolic process;BP:response to oxidative stress;BP:response to oxidative stress;BP:response to oxidative stress;BP:response to oxidative stress;MF:catalase activity;MF:heme binding;MF:metal ion binding;MF:catalase activity;MF:heme binding;MF:catalase activity;MF:heme binding;MF:metal ion binding;MF:catalase activity;MF:heme binding;	K03781	katE, CAT, catB, srpA	map00630; map04016; map00380; map04146;	Glyoxylate and dicarboxylate metabolism;MAPK signaling pathway - plant;Tryptophan metabolism;Peroxisome;	------	------	------	------	GAQ92572.1;	catalase [Klebsormidium nitens];	gi|115702|sp|P04040.3|CATA_HUMAN;	RecName: Full=Catalase;	PF00199.16;	Catalase;	Catalase;
TRINITY_DN75704_c0_g1	253	GO:0042744; GO:0006979; GO:0005576;GO:0020037; GO:0046872; GO:0004601;	BP:hydrogen peroxide catabolic process;BP:response to oxidative stress;CC:extracellular region;MF:heme binding;MF:metal ion binding;MF:peroxidase activity;	K00430	E1.11.1.7	map00940;	Phenylpropanoid biosynthesis;	------	------	------	------	XP_021904017.1;	peroxidase P7 [Carica papaya];	gi|223635590|sp|A7NY33.1|PER4_VITVI;	RecName: Full=Peroxidase 4; Flags: Precursor;	------	------	------
TRINITY_DN884_c0_g1	472	GO:0006979; GO:0006979; GO:0006979; GO:0016021; GO:0016021;GO:0020037; GO:0004601; GO:0020037; GO:0004601; GO:0020037; GO:0004601;	BP:response to oxidative stress;BP:response to oxidative stress;BP:response to oxidative stress;CC:integral component of membrane;CC:integral component of membrane;MF:heme binding;MF:peroxidase activity;MF:heme binding;MF:peroxidase activity;MF:heme binding;MF:peroxidase activity;	K00434	E1.11.1.11	map00480; map00053;	Glutathione metabolism;Ascorbate and aldarate metabolism;	------	------	------	------	KVH96040.1;	heme peroxidase [Cynara cardunculus var. scolymus];	gi|122228484|sp|Q0JEQ2.1|APX3_ORYSJ;	RecName: Full=Probable L-ascorbate peroxidase 3; AltName: Full=OsAPx03;	------	------	------
TRINITY_DN89683_c0_g1	575	GO:0042744; GO:0006979; GO:0042744; GO:0006979; GO:0005576; GO:0005576;GO:0020037; GO:0046872; GO:0004601; GO:0020037; GO:0046872; GO:0004601;	BP:hydrogen peroxide catabolic process;BP:response to oxidative stress;BP:hydrogen peroxide catabolic process;BP:response to oxidative stress;CC:extracellular region;CC:extracellular region;MF:heme binding;MF:metal ion binding;MF:peroxidase activity;MF:heme binding;MF:metal ion binding;MF:peroxidase activity;	K00430	E1.11.1.7	map00940;	Phenylpropanoid biosynthesis;	------	------	NOG19163;	G:Carbohydrate transport and metabolism;	KZV20088.1;	peroxidase 12 [Dorcoceras hygrometricum];	gi|25453205|sp|Q96520.1|PER12_ARATH;	RecName: Full=Peroxidase 12; Short=Atperox P12; AltName: Full=ATP4a; AltName: Full=PRXR6; Flags: Precursor;	PF00141.20;	peroxidase;	Peroxidase;
TRINITY_DN89961_c0_g1	259	------	------	K00430	E1.11.1.7	map00940;	Phenylpropanoid biosynthesis;	------	------	------	------	XP_023918932.1;	peroxidase 5-like, partial [Quercus suber];	gi|25453193|sp|O49293.2|PER13_ARATH;	RecName: Full=Peroxidase 13; Short=Atperox P13; Flags: Precursor;	------	------	------
TRINITY_DN92235_c0_g1	262	GO:0046872; GO:0004784; GO:0046872; GO:0004784;	MF:metal ion binding;MF:superoxide dismutase activity;MF:metal ion binding;MF:superoxide dismutase activity;	K04564	SOD2	map04146;	Peroxisome;	------	------	------	------	XP_021909695.1;	superoxide dismutase [Mn], mitochondrial-like [Carica papaya];	gi|134665|sp|P04179.2|SODM_HUMAN;	RecName: Full=Superoxide dismutase [Mn], mitochondrial; Flags: Precursor;	PF00081.19;	Sod_Fe_N;	Iron/manganese superoxide dismutases, alpha-hairpin domain;
TRINITY_DN93604_c0_g1	242	GO:0042744; GO:0006979; GO:0042744; GO:0006979; GO:0005576; GO:0005576;GO:0020037; GO:0046872; GO:0004601; GO:0020037; GO:0046872; GO:0004601;	BP:hydrogen peroxide catabolic process;BP:response to oxidative stress;BP:hydrogen peroxide catabolic process;BP:response to oxidative stress;CC:extracellular region;CC:extracellular region;MF:heme binding;MF:metal ion binding;MF:peroxidase activity;MF:heme binding;MF:metal ion binding;MF:peroxidase activity;	K00430	E1.11.1.7	map00940;	Phenylpropanoid biosynthesis;	------	------	------	------	XP_021726359.1;	peroxidase 3-like [Chenopodium quinoa];	gi|26397917|sp|Q9SUT2.1|PER39_ARATH;	RecName: Full=Peroxidase 39; Short=Atperox P39; AltName: Full=ATP19a; Flags: Precursor;	PF00141.20;	peroxidase;	Peroxidase;
TRINITY_DN94547_c0_g1	359	GO:0042744; GO:0006979; GO:0005576;GO:0020037; GO:0046872; GO:0004601;	BP:hydrogen peroxide catabolic process;BP:response to oxidative stress;CC:extracellular region;MF:heme binding;MF:metal ion binding;MF:peroxidase activity;	K00430	E1.11.1.7	map00940;	Phenylpropanoid biosynthesis;	------	------	------	------	XP_021838020.1;	peroxidase 60-like [Spinacia oleracea];	gi|25453193|sp|O49293.2|PER13_ARATH;	RecName: Full=Peroxidase 13; Short=Atperox P13; Flags: Precursor;	PF00141.20;	peroxidase;	Peroxidase;
TRINITY_DN97882_c0_g1	239	------	------	K00430	E1.11.1.7	map00940;	Phenylpropanoid biosynthesis;	------	------	------	------	XP_010695664.1;	PREDICTED: peroxidase P7 [Beta vulgaris subsp. vulgaris];	gi|26397866|sp|Q9LVL2.1|PER67_ARATH;	RecName: Full=Peroxidase 67; Short=Atperox P67; AltName: Full=ATP44; Flags: Precursor;	------	------	------
TRINITY_DN13420_c0_g1	267	GO:0030001; GO:0006801; GO:0005975; GO:0071555; GO:0005576;GO:0046872; GO:0004650;	BP:metal ion transport;BP:superoxide metabolic process;BP:carbohydrate metabolic process;BP:cell wall organization;CC:extracellular region;MF:metal ion binding;MF:polygalacturonase activity;	------	------	------	------	------	------	------	------	PHU28306.1;	Copper chaperone for superoxide dismutase, chloroplastic/cytosolic [Capsicum chinense];	------	------	------	------	------
TRINITY_DN19483_c0_g1	218	GO:0030001; GO:0006801;GO:0046872; GO:0046983; GO:0016491;	BP:metal ion transport;BP:superoxide metabolic process;MF:metal ion binding;MF:protein dimerization activity;MF:oxidoreductase activity;	K03231;K04728;K07562;K12272	SRPRB, SRP102;ATM, TEL1;NMD3;EEF1A	map03008; map03060; map03013; map03440;	Ribosome biogenesis in eukaryotes;Protein export;RNA transport;Homologous recombination;	------	------	------	------	PHU28306.1;	Copper chaperone for superoxide dismutase, chloroplastic/cytosolic [Capsicum chinense];	------	------	------	------	------
TRINITY_DN23957_c0_g2	264	------	------	K00430	E1.11.1.7	map00940;	Phenylpropanoid biosynthesis;	------	------	------	------	XP_021769298.1;	peroxidase 4-like [Chenopodium quinoa];	gi|223635590|sp|A7NY33.1|PER4_VITVI;	RecName: Full=Peroxidase 4; Flags: Precursor;	PF00141.20;	peroxidase;	Peroxidase;
TRINITY_DN2620_c0_g1	718	------	------	K00430	E1.11.1.7	map00940;	Phenylpropanoid biosynthesis;	------	------	------	------	XP_021727078.1;	peroxidase 5-like [Chenopodium quinoa];	gi|300669658|sp|A7QEU4.2|PER5_VITVI;	RecName: Full=Peroxidase 5; Flags: Precursor;	PF00141.20;	peroxidase;	Peroxidase;
TRINITY_DN27841_c0_g1	445	GO:0042744; GO:0006979; GO:0005576;GO:0020037; GO:0046872; GO:0004601;	BP:hydrogen peroxide catabolic process;BP:response to oxidative stress;CC:extracellular region;MF:heme binding;MF:metal ion binding;MF:peroxidase activity;	K00430	E1.11.1.7	map00940;	Phenylpropanoid biosynthesis;	------	------	------	------	XP_010681225.1;	PREDICTED: peroxidase 12 [Beta vulgaris subsp. vulgaris];	gi|25453205|sp|Q96520.1|PER12_ARATH;	RecName: Full=Peroxidase 12; Short=Atperox P12; AltName: Full=ATP4a; AltName: Full=PRXR6; Flags: Precursor;	PF00141.20;	peroxidase;	Peroxidase;
TRINITY_DN30055_c0_g1	1216	------	------	K00430	E1.11.1.7	map00940;	Phenylpropanoid biosynthesis;	------	------	------	------	XP_021747192.1;	peroxidase 57-like [Chenopodium quinoa];	gi|26397647|sp|Q43729.1|PER57_ARATH;	RecName: Full=Peroxidase 57; Short=Atperox P57; AltName: Full=ATP13a; AltName: Full=PRXR10; Flags: Precursor;	PF00141.20;	peroxidase;	Peroxidase;
TRINITY_DN32434_c0_g1	1128	GO:0042744; GO:0006979; GO:0005576;GO:0020037; GO:0046872; GO:0004601;	BP:hydrogen peroxide catabolic process;BP:response to oxidative stress;CC:extracellular region;MF:heme binding;MF:metal ion binding;MF:peroxidase activity;	K00430	E1.11.1.7	map00940;	Phenylpropanoid biosynthesis;	------	------	NOG26018;	I:Lipid transport and metabolism;	XP_021865405.1;	peroxidase 44-like [Spinacia oleracea];	gi|26397719|sp|Q93V93.1|PER44_ARATH;	RecName: Full=Peroxidase 44; Short=Atperox P44; AltName: Full=ATP35; Flags: Precursor;	PF00141.20;	peroxidase;	Peroxidase;
TRINITY_DN33825_c0_g1	469	GO:0042744; GO:0006979; GO:0042744; GO:0006979; GO:0005576; GO:0016021; GO:0005576;GO:0020037; GO:0046872; GO:0004601; GO:0020037; GO:0046872; GO:0004601;	BP:hydrogen peroxide catabolic process;BP:response to oxidative stress;BP:hydrogen peroxide catabolic process;BP:response to oxidative stress;CC:extracellular region;CC:integral component of membrane;CC:extracellular region;MF:heme binding;MF:metal ion binding;MF:peroxidase activity;MF:heme binding;MF:metal ion binding;MF:peroxidase activity;	K00430	E1.11.1.7	map00940;	Phenylpropanoid biosynthesis;	------	------	------	------	XP_022850230.1;	peroxidase 12-like [Olea europaea var. sylvestris];	gi|25453205|sp|Q96520.1|PER12_ARATH;	RecName: Full=Peroxidase 12; Short=Atperox P12; AltName: Full=ATP4a; AltName: Full=PRXR6; Flags: Precursor;	PF00141.20;	peroxidase;	Peroxidase;
TRINITY_DN34915_c0_g1	1811	------	------	K00430	E1.11.1.7	map00940;	Phenylpropanoid biosynthesis;	------	------	------	------	XP_010685962.1;	PREDICTED: cationic peroxidase 1-like [Beta vulgaris subsp. vulgaris];	gi|6093671|sp|P22195.2|PER1_ARAHY;	RecName: Full=Cationic peroxidase 1; AltName: Full=PNPC1; Flags: Precursor;	PF00141.20;	peroxidase;	Peroxidase;
TRINITY_DN34922_c0_g1	496	GO:0042744; GO:0006979; GO:0005576;GO:0020037; GO:0046872; GO:0004601;	BP:hydrogen peroxide catabolic process;BP:response to oxidative stress;CC:extracellular region;MF:heme binding;MF:metal ion binding;MF:peroxidase activity;	K00430	E1.11.1.7	map00940;	Phenylpropanoid biosynthesis;	------	------	------	------	XP_021771551.1;	peroxidase 12-like [Chenopodium quinoa];	gi|25453205|sp|Q96520.1|PER12_ARATH;	RecName: Full=Peroxidase 12; Short=Atperox P12; AltName: Full=ATP4a; AltName: Full=PRXR6; Flags: Precursor;	PF00141.20;	peroxidase;	Peroxidase;
TRINITY_DN36307_c0_g1	599	GO:0042744; GO:0006979; GO:0005576;GO:0020037; GO:0046872; GO:0004601;	BP:hydrogen peroxide catabolic process;BP:response to oxidative stress;CC:extracellular region;MF:heme binding;MF:metal ion binding;MF:peroxidase activity;	------	------	------	------	------	------	------	------	XP_021737719.1;	peroxidase 12-like [Chenopodium quinoa];	------	------	------	------	------
TRINITY_DN36582_c0_g1	1329	------	------	K00430	E1.11.1.7	map00940;	Phenylpropanoid biosynthesis;	------	------	------	------	XP_010695657.1;	PREDICTED: peroxidase P7-like [Beta vulgaris subsp. vulgaris];	gi|223635590|sp|A7NY33.1|PER4_VITVI;	RecName: Full=Peroxidase 4; Flags: Precursor;	PF00141.20;	peroxidase;	Peroxidase;
TRINITY_DN36636_c0_g1	2108	GO:0042744; GO:0006979; GO:0005576;GO:0020037; GO:0046872; GO:0004601;	BP:hydrogen peroxide catabolic process;BP:response to oxidative stress;CC:extracellular region;MF:heme binding;MF:metal ion binding;MF:peroxidase activity;	K00430	E1.11.1.7	map00940;	Phenylpropanoid biosynthesis;	------	------	------	------	XP_010685987.1;	PREDICTED: peroxidase 57 [Beta vulgaris subsp. vulgaris];	gi|25453190|sp|O23044.1|PER3_ARATH;	RecName: Full=Peroxidase 3; Short=Atperox P3; AltName: Full=ATPRC; AltName: Full=RCI3A; AltName: Full=Rare cold-inducible protein; Flags: Precursor;	------	------	------
TRINITY_DN36875_c0_g2	1821	------	------	K00432	gpx	map00590; map00480;	Arachidonic acid metabolism;Glutathione metabolism;	COG0386;	O:Posttranslational modification, protein turnover, chaperones;	------	------	XP_021752167.1;	probable glutathione peroxidase 2 [Chenopodium quinoa];	gi|44887923|sp|O22850.1|GPX3_ARATH;	RecName: Full=Probable glutathione peroxidase 3, mitochondrial; Flags: Precursor;	------	------	------
TRINITY_DN37155_c0_g1	1245	GO:0042744; GO:0006979; GO:0005576;GO:0020037; GO:0046872; GO:0004601;	BP:hydrogen peroxide catabolic process;BP:response to oxidative stress;CC:extracellular region;MF:heme binding;MF:metal ion binding;MF:peroxidase activity;	K00430	E1.11.1.7	map00940;	Phenylpropanoid biosynthesis;	------	------	------	------	ACN42168.1;	peroxidase 1 [Sesuvium portulacastrum];	gi|223635590|sp|A7NY33.1|PER4_VITVI;	RecName: Full=Peroxidase 4; Flags: Precursor;	PF00141.20;	peroxidase;	Peroxidase;
TRINITY_DN37559_c0_g1	1462	GO:0042744; GO:0006979; GO:0042744; GO:0006979; GO:0005576; GO:0005576;GO:0020037; GO:0046872; GO:0004601; GO:0020037; GO:0046872; GO:0004601;	BP:hydrogen peroxide catabolic process;BP:response to oxidative stress;BP:hydrogen peroxide catabolic process;BP:response to oxidative stress;CC:extracellular region;CC:extracellular region;MF:heme binding;MF:metal ion binding;MF:peroxidase activity;MF:heme binding;MF:metal ion binding;MF:peroxidase activity;	K00430	E1.11.1.7	map00940;	Phenylpropanoid biosynthesis;	------	------	------	------	XP_010679607.1;	PREDICTED: peroxidase 50 [Beta vulgaris subsp. vulgaris];	gi|25453201|sp|Q96510.1|PER35_ARATH;	RecName: Full=Peroxidase 35; Short=Atperox P35; AltName: Full=ATP21a; Flags: Precursor;	PF00141.20;	peroxidase;	Peroxidase;
TRINITY_DN38065_c0_g1	1980	GO:0042744; GO:0006979; GO:0042744; GO:0006979; GO:0005576; GO:0005576;GO:0020037; GO:0046872; GO:0004601; GO:0020037; GO:0046872; GO:0004601;	BP:hydrogen peroxide catabolic process;BP:response to oxidative stress;BP:hydrogen peroxide catabolic process;BP:response to oxidative stress;CC:extracellular region;CC:extracellular region;MF:heme binding;MF:metal ion binding;MF:peroxidase activity;MF:heme binding;MF:metal ion binding;MF:peroxidase activity;	K00430	E1.11.1.7	map00940;	Phenylpropanoid biosynthesis;	------	------	------	------	XP_021863763.1;	peroxidase 16-like [Spinacia oleracea];	gi|26397723|sp|Q96509.1|PER55_ARATH;	RecName: Full=Peroxidase 55; Short=Atperox P55; AltName: Full=ATP20a; Flags: Precursor;	PF00141.20;	peroxidase;	Peroxidase;
TRINITY_DN3830_c0_g1	366	GO:0042744; GO:0006979; GO:0005576;GO:0020037; GO:0046872; GO:0004601;	BP:hydrogen peroxide catabolic process;BP:response to oxidative stress;CC:extracellular region;MF:heme binding;MF:metal ion binding;MF:peroxidase activity;	K00430	E1.11.1.7	map00940;	Phenylpropanoid biosynthesis;	------	------	------	------	XP_010681225.1;	PREDICTED: peroxidase 12 [Beta vulgaris subsp. vulgaris];	gi|25453205|sp|Q96520.1|PER12_ARATH;	RecName: Full=Peroxidase 12; Short=Atperox P12; AltName: Full=ATP4a; AltName: Full=PRXR6; Flags: Precursor;	------	------	------
TRINITY_DN39475_c0_g1	1218	GO:0042744; GO:0006979; GO:0005576;GO:0020037; GO:0046872; GO:0004601;	BP:hydrogen peroxide catabolic process;BP:response to oxidative stress;CC:extracellular region;MF:heme binding;MF:metal ion binding;MF:peroxidase activity;	K00430	E1.11.1.7	map00940;	Phenylpropanoid biosynthesis;	------	------	NOG123237;	G:Carbohydrate transport and metabolism;	XP_021718077.1;	peroxidase 72-like [Chenopodium quinoa];	gi|26397792|sp|Q9FJZ9.1|PER72_ARATH;	RecName: Full=Peroxidase 72; Short=Atperox P72; AltName: Full=ATP6a; AltName: Full=PRXR8; Flags: Precursor;	PF00141.20;	peroxidase;	Peroxidase;
TRINITY_DN39834_c0_g1	1051	------	------	K00434	E1.11.1.11	map00480; map00053;	Glutathione metabolism;Ascorbate and aldarate metabolism;	------	------	------	------	XP_010696200.1;	PREDICTED: putative L-ascorbate peroxidase 6 [Beta vulgaris subsp. vulgaris];	gi|75244424|sp|Q8GY91.1|APX6_ARATH;	RecName: Full=Putative L-ascorbate peroxidase 6; Short=AtAPx08;	------	------	------
TRINITY_DN40737_c0_g2	1171	GO:0046872; GO:0004784;	MF:metal ion binding;MF:superoxide dismutase activity;	K04564	SOD2	map04146;	Peroxisome;	COG0605;	P:Inorganic ion transport and metabolism;	------	------	XP_021758206.1;	superoxide dismutase [Mn], mitochondrial-like [Chenopodium quinoa];	gi|134672|sp|P11796.1|SODM_NICPL;	RecName: Full=Superoxide dismutase [Mn], mitochondrial; Flags: Precursor;	PF00081.19; PF02777.15;	Sod_Fe_N;Sod_Fe_C;	Iron/manganese superoxide dismutases, alpha-hairpin domain;Iron/manganese superoxide dismutases, C-terminal domain;
TRINITY_DN40737_c0_g3	1466	------	------	K04564	SOD2	map04146;	Peroxisome;	COG0605;	P:Inorganic ion transport and metabolism;	------	------	XP_021862810.1;	superoxide dismutase [Mn], mitochondrial [Spinacia oleracea];	gi|134672|sp|P11796.1|SODM_NICPL;	RecName: Full=Superoxide dismutase [Mn], mitochondrial; Flags: Precursor;	PF02777.15; PF00081.19;	Sod_Fe_C;Sod_Fe_N;	Iron/manganese superoxide dismutases, C-terminal domain;Iron/manganese superoxide dismutases, alpha-hairpin domain;
TRINITY_DN42089_c0_g1	1764	GO:0042744; GO:0006979; GO:0042744; GO:0006979; GO:0005576; GO:0005576;GO:0020037; GO:0046872; GO:0004601; GO:0020037; GO:0046872; GO:0004601;	BP:hydrogen peroxide catabolic process;BP:response to oxidative stress;BP:hydrogen peroxide catabolic process;BP:response to oxidative stress;CC:extracellular region;CC:extracellular region;MF:heme binding;MF:metal ion binding;MF:peroxidase activity;MF:heme binding;MF:metal ion binding;MF:peroxidase activity;	K00430	E1.11.1.7	map00940;	Phenylpropanoid biosynthesis;	------	------	NOG29576;	G:Carbohydrate transport and metabolism;	XP_021741284.1;	peroxidase 31-like [Chenopodium quinoa];	gi|26397798|sp|Q9FL16.1|PER63_ARATH;	RecName: Full=Peroxidase 63; Short=Atperox P63; AltName: Full=ATP26a; Flags: Precursor;	PF00141.20;	peroxidase;	Peroxidase;
TRINITY_DN43838_c0_g1	1380	GO:0045454; GO:0005623;GO:0016209; GO:0016491;	BP:cell redox homeostasis;CC:cell;MF:antioxidant activity;MF:oxidoreductase activity;	------	------	------	------	COG0526;	O:Posttranslational modification, protein turnover, chaperones;	------	------	XP_021837046.1;	uncharacterized protein LOC110776789 isoform X1 [Spinacia oleracea];	------	------	PF00578.18; PF08534.7;	AhpC-TSA;Redoxin;	AhpC/TSA family;Redoxin;
TRINITY_DN44270_c0_g1	725	GO:0042744; GO:0006979; GO:0042744; GO:0006979; GO:0042744; GO:0006979; GO:0005576; GO:0005576;GO:0020037; GO:0046872; GO:0004601; GO:0020037; GO:0046872; GO:0004601; GO:0020037; GO:0046872; GO:0004601;	BP:hydrogen peroxide catabolic process;BP:response to oxidative stress;BP:hydrogen peroxide catabolic process;BP:response to oxidative stress;BP:hydrogen peroxide catabolic process;BP:response to oxidative stress;CC:extracellular region;CC:extracellular region;MF:heme binding;MF:metal ion binding;MF:peroxidase activity;MF:heme binding;MF:metal ion binding;MF:peroxidase activity;MF:heme binding;MF…	K00430	E1.11.1.7	map00940;	Phenylpropanoid biosynthesis;	------	------	------	------	KYP50592.1;	Peroxidase 12 [Cajanus cajan];	gi|25453205|sp|Q96520.1|PER12_ARATH;	RecName: Full=Peroxidase 12; Short=Atperox P12; AltName: Full=ATP4a; AltName: Full=PRXR6; Flags: Precursor;	PF00141.20;	peroxidase;	Peroxidase;
TRINITY_DN44390_c0_g1	1657	GO:0006979; GO:0034599; GO:0042744; GO:0000302; GO:0006979; GO:0009507;GO:0020037; GO:0016688; GO:0004130; GO:0020037; GO:0016688; GO:0020037; GO:0004601;	BP:response to oxidative stress;BP:cellular response to oxidative stress;BP:hydrogen peroxide catabolic process;BP:response to reactive oxygen species;BP:response to oxidative stress;CC:chloroplast;MF:heme binding;MF:L-ascorbate peroxidase activity;MF:cytochrome-c peroxidase activity;MF:heme binding;MF:L-ascorbate peroxidase activity;MF:heme binding;MF:peroxidase activity;	K00434	E1.11.1.11	map00480; map00053;	Glutathione metabolism;Ascorbate and aldarate metabolism;	COG0376;	P:Inorganic ion transport and metabolism;	------	------	PIN13309.1;	L-ascorbate peroxidase [Handroanthus impetiginosus];	gi|75308965|sp|Q9FE01.1|APX2_ORYSJ;	RecName: Full=L-ascorbate peroxidase 2, cytosolic; AltName: Full=APXb; AltName: Full=OsAPx02;	PF00141.20;	peroxidase;	Peroxidase;
TRINITY_DN44574_c0_g1	1309	GO:0006979; GO:0006979;GO:0004602; GO:0004602;	BP:response to oxidative stress;BP:response to oxidative stress;MF:glutathione peroxidase activity;MF:glutathione peroxidase activity;	K00432	gpx	map00590; map00480;	Arachidonic acid metabolism;Glutathione metabolism;	COG0386;	O:Posttranslational modification, protein turnover, chaperones;	------	------	XP_008437255.1;	PREDICTED: probable glutathione peroxidase 8 [Cucumis melo];	gi|75155056|sp|Q8LBU2.1|GPX8_ARATH;	RecName: Full=Probable glutathione peroxidase 8;	PF00255.16;	GSHPx;	Glutathione peroxidase;
TRINITY_DN45254_c0_g1	1256	------	------	K00430	E1.11.1.7	map00940;	Phenylpropanoid biosynthesis;	------	------	NOG19163;	G:Carbohydrate transport and metabolism;	XP_021755864.1;	peroxidase 12-like [Chenopodium quinoa];	gi|25453205|sp|Q96520.1|PER12_ARATH;	RecName: Full=Peroxidase 12; Short=Atperox P12; AltName: Full=ATP4a; AltName: Full=PRXR6; Flags: Precursor;	PF00141.20;	peroxidase;	Peroxidase;
TRINITY_DN45458_c15_g4	1009	GO:0030001; GO:0006801; GO:0005975; GO:0006108; GO:0006099;GO:0046872; GO:0016491; GO:0030060;	BP:metal ion transport;BP:superoxide metabolic process;BP:carbohydrate metabolic process;BP:malate metabolic process;BP:tricarboxylic acid cycle;MF:metal ion binding;MF:oxidoreductase activity;MF:L-malate dehydrogenase activity;	K03231;K07562	NMD3;EEF1A	map03008; map03013;	Ribosome biogenesis in eukaryotes;RNA transport;	------	------	------	------	PHU28306.1;	Copper chaperone for superoxide dismutase, chloroplastic/cytosolic [Capsicum chinense];	------	------	------	------	------
TRINITY_DN45623_c0_g1	1627	GO:0042744; GO:0006979; GO:0005576;GO:0020037; GO:0046872; GO:0004601;	BP:hydrogen peroxide catabolic process;BP:response to oxidative stress;CC:extracellular region;MF:heme binding;MF:metal ion binding;MF:peroxidase activity;	K00430	E1.11.1.7	map00940;	Phenylpropanoid biosynthesis;	------	------	------	------	XP_021716320.1;	peroxidase P7-like [Chenopodium quinoa];	gi|223635590|sp|A7NY33.1|PER4_VITVI;	RecName: Full=Peroxidase 4; Flags: Precursor;	PF00141.20;	peroxidase;	Peroxidase;
TRINITY_DN46253_c0_g2	1864	------	------	K00430	E1.11.1.7	map00940;	Phenylpropanoid biosynthesis;	------	------	NOG58286;	S:Function unknown;	XP_010669285.1;	PREDICTED: peroxidase 16 [Beta vulgaris subsp. vulgaris];	gi|25453203|sp|Q96518.2|PER16_ARATH;	RecName: Full=Peroxidase 16; Short=Atperox P16; AltName: Full=ATP22a; Flags: Precursor;	PF00141.20;	peroxidase;	Peroxidase;
TRINITY_DN46320_c2_g2	258	GO:0030001; GO:0006801;GO:0046872;	BP:metal ion transport;BP:superoxide metabolic process;MF:metal ion binding;	K06927;K04728;K12272;K14948	SRPRB, SRP102;ATM, TEL1;DPH6;PTBP2, NPTB	map03440; map03060;	Homologous recombination;Protein export;	------	------	------	------	PHU28306.1;	Copper chaperone for superoxide dismutase, chloroplastic/cytosolic [Capsicum chinense];	------	------	------	------	------
TRINITY_DN46320_c4_g1	262	GO:0006979; GO:0006298; GO:0016021;GO:0020037; GO:0004601; GO:0008289; GO:0005524; GO:0030983;	BP:response to oxidative stress;BP:mismatch repair;CC:integral component of membrane;MF:heme binding;MF:peroxidase activity;MF:lipid binding;MF:ATP binding;MF:mismatched DNA binding;	------	------	------	------	------	------	------	------	PHT51239.1;	Peroxidase 9 [Capsicum baccatum];	------	------	------	------	------
TRINITY_DN46445_c0_g1	1328	GO:0071486; GO:0071457; GO:0071472; GO:0071493; GO:0005737; GO:0005777; GO:0005773;GO:0046872; GO:0004784; GO:0046872; GO:0004784; GO:0046872; GO:0004784;	BP:cellular response to high light intensity;BP:cellular response to ozone;BP:cellular response to salt stress;BP:cellular response to UV-B;CC:cytoplasm;CC:peroxisome;CC:vacuole;MF:metal ion binding;MF:superoxide dismutase activity;MF:metal ion binding;MF:superoxide dismutase activity;MF:metal ion binding;MF:superoxide dismutase activity;	K04565	SOD1	map04146;	Peroxisome;	COG2032;	P:Inorganic ion transport and metabolism;	------	------	O49044.1;	RecName: Full=Superoxide dismutase [Cu-Zn] 2;	gi|3334333|sp|O49044.1|SODC2_MESCR;	RecName: Full=Superoxide dismutase [Cu-Zn] 2;	PF00080.17;	Sod_Cu;	Copper/zinc superoxide dismutase;
TRINITY_DN47130_c0_g1	1319	GO:0006979; GO:0006979;GO:0004602; GO:0004602;	BP:response to oxidative stress;BP:response to oxidative stress;MF:glutathione peroxidase activity;MF:glutathione peroxidase activity;	K00432	gpx	map00590; map00480;	Arachidonic acid metabolism;Glutathione metabolism;	COG0386;	O:Posttranslational modification, protein turnover, chaperones;	------	------	XP_006288574.1;	probable phospholipid hydroperoxide glutathione peroxidase 6, mitochondrial [Capsella rubella];	gi|20138151|sp|O23814.1|GPX4_SPIOL;	RecName: Full=Probable phospholipid hydroperoxide glutathione peroxidase; Short=PHGPx;	------	------	------
TRINITY_DN47130_c1_g1	1608	GO:0006979; GO:0006979;GO:0004602; GO:0004602;	BP:response to oxidative stress;BP:response to oxidative stress;MF:glutathione peroxidase activity;MF:glutathione peroxidase activity;	K00432	gpx	map00590; map00480;	Arachidonic acid metabolism;Glutathione metabolism;	COG0386;	O:Posttranslational modification, protein turnover, chaperones;	------	------	XP_013615284.1;	PREDICTED: probable phospholipid hydroperoxide glutathione peroxidase 6, mitochondrial isoform X1 [Brassica oleracea var. oleracea];	gi|20138384|sp|Q9LEF0.1|GPX4_MESCR;	RecName: Full=Probable phospholipid hydroperoxide glutathione peroxidase; Short=PHGPx;	PF00255.16;	GSHPx;	Glutathione peroxidase;
TRINITY_DN47371_c0_g1	1577	------	------	K04564	SOD2	map04146;	Peroxisome;	COG0605;	P:Inorganic ion transport and metabolism;	------	------	XP_021715481.1;	superoxide dismutase [Fe] 3, chloroplastic-like isoform X1 [Chenopodium quinoa];	gi|75262735|sp|Q9FMX0.1|SODF3_ARATH;	RecName: Full=Superoxide dismutase [Fe] 3, chloroplastic; AltName: Full=Protein FE SUPEROXIDE DISMUTASE 3; Flags: Precursor;	PF02777.15; PF00081.19;	Sod_Fe_C;Sod_Fe_N;	Iron/manganese superoxide dismutases, C-terminal domain;Iron/manganese superoxide dismutases, alpha-hairpin domain;
TRINITY_DN47374_c0_g1	587	GO:0042744; GO:0006979; GO:0005576;GO:0020037; GO:0046872; GO:0004601;	BP:hydrogen peroxide catabolic process;BP:response to oxidative stress;CC:extracellular region;MF:heme binding;MF:metal ion binding;MF:peroxidase activity;	K00430	E1.11.1.7	map00940;	Phenylpropanoid biosynthesis;	------	------	------	------	XP_010681206.1;	PREDICTED: peroxidase 12 [Beta vulgaris subsp. vulgaris];	gi|25453205|sp|Q96520.1|PER12_ARATH;	RecName: Full=Peroxidase 12; Short=Atperox P12; AltName: Full=ATP4a; AltName: Full=PRXR6; Flags: Precursor;	PF00141.20;	peroxidase;	Peroxidase;
TRINITY_DN49764_c0_g1	1539	GO:0005737;GO:0046872; GO:0004784;	CC:cytoplasm;MF:metal ion binding;MF:superoxide dismutase activity;	------	------	------	------	------	------	------	------	XP_020080475.1;	superoxide dismutase [Cu-Zn] [Ananas comosus];	gi|122170280|sp|Q0DRV6.1|SODC1_ORYSJ;	RecName: Full=Superoxide dismutase [Cu-Zn] 1 >gi|158513198|sp|A2XGP6.2|SODC1_ORYSI RecName: Full=Superoxide dismutase [Cu-Zn] 1;	------	------	------
TRINITY_DN49807_c5_g2	2172	GO:0042744; GO:0006979; GO:0042744; GO:0006979; GO:0042744; GO:0006979; GO:0005576; GO:0005576; GO:0005576;GO:0020037; GO:0046872; GO:0004601; GO:0020037; GO:0046872; GO:0004601; GO:0020037; GO:0046872; GO:0004601;	BP:hydrogen peroxide catabolic process;BP:response to oxidative stress;BP:hydrogen peroxide catabolic process;BP:response to oxidative stress;BP:hydrogen peroxide catabolic process;BP:response to oxidative stress;CC:extracellular region;CC:extracellular region;CC:extracellular region;MF:heme binding;MF:metal ion binding;MF:peroxidase activity;MF:heme binding;MF:metal ion binding;MF:peroxidase act…	K00430	E1.11.1.7	map00940;	Phenylpropanoid biosynthesis;	------	------	------	------	XP_021725934.1;	peroxidase 5-like [Chenopodium quinoa];	gi|300669658|sp|A7QEU4.2|PER5_VITVI;	RecName: Full=Peroxidase 5; Flags: Precursor;	PF00141.20;	peroxidase;	Peroxidase;
TRINITY_DN51725_c0_g1	1512	------	------	K04569	CCS	------	------	COG2608;	P:Inorganic ion transport and metabolism;	------	------	XP_021754039.1;	copper chaperone for superoxide dismutase, chloroplastic/cytosolic-like [Chenopodium quinoa];	gi|75263761|sp|Q9LD47.1|CCS_ARATH;	RecName: Full=Copper chaperone for superoxide dismutase, chloroplastic/cytosolic; Short=AtCCS; AltName: Full=Superoxide dismutase copper chaperone; Flags: Precursor;	PF00080.17; PF00403.23;	Sod_Cu;HMA;	Copper/zinc superoxide dismutase;Heavy-metal-associated domain;
TRINITY_DN51760_c1_g1	1812	GO:0042744; GO:0006979; GO:0005576;GO:0020037; GO:0046872; GO:0004601;	BP:hydrogen peroxide catabolic process;BP:response to oxidative stress;CC:extracellular region;MF:heme binding;MF:metal ion binding;MF:peroxidase activity;	K00430	E1.11.1.7	map00940;	Phenylpropanoid biosynthesis;	------	------	NOG123647;	I:Lipid transport and metabolism;	XP_010681313.1;	PREDICTED: peroxidase 11 [Beta vulgaris subsp. vulgaris];	gi|25453204|sp|Q96519.1|PER11_ARATH;	RecName: Full=Peroxidase 11; Short=Atperox P11; AltName: Full=ATP23a/ATP23b; Flags: Precursor;	PF00141.20;	peroxidase;	Peroxidase;
TRINITY_DN52071_c2_g1	2672	GO:0042744; GO:0006979; GO:0042744; GO:0006979; GO:0042744; GO:0006979; GO:0042744; GO:0006979;GO:0004096; GO:0020037; GO:0046872; GO:0004096; GO:0020037; GO:0046872; GO:0004096; GO:0020037; GO:0046872; GO:0004096; GO:0020037; GO:0046872;	BP:hydrogen peroxide catabolic process;BP:response to oxidative stress;BP:hydrogen peroxide catabolic process;BP:response to oxidative stress;BP:hydrogen peroxide catabolic process;BP:response to oxidative stress;BP:hydrogen peroxide catabolic process;BP:response to oxidative stress;MF:catalase activity;MF:heme binding;MF:metal ion binding;MF:catalase activity;MF:heme binding;MF:metal ion binding…	K03781	katE, CAT, catB, srpA	map00630; map04016; map00380; map04146;	Glyoxylate and dicarboxylate metabolism;MAPK signaling pathway - plant;Tryptophan metabolism;Peroxisome;	COG0753;	P:Inorganic ion transport and metabolism;	------	------	AHF21552.1;	catalase [Hylocereus undatus];	gi|17865693|sp|P25819.3|CATA2_ARATH;	RecName: Full=Catalase-2;	PF00199.16;	Catalase;	Catalase;
TRINITY_DN52298_c0_g1	957	GO:0006979; GO:0006979; GO:0016021; GO:0016021;GO:0020037; GO:0016688; GO:0020037; GO:0004601;	BP:response to oxidative stress;BP:response to oxidative stress;CC:integral component of membrane;CC:integral component of membrane;MF:heme binding;MF:L-ascorbate peroxidase activity;MF:heme binding;MF:peroxidase activity;	K00434	E1.11.1.11	map00480; map00053;	Glutathione metabolism;Ascorbate and aldarate metabolism;	------	------	------	------	AAC19393.1;	thylakoid-bound L-ascorbate peroxidase precursor [Mesembryanthemum crystallinum];	gi|118572831|sp|Q42593.2|APXT_ARATH;	RecName: Full=L-ascorbate peroxidase T, chloroplastic; AltName: Full=Thylakoid-bound ascorbate peroxidase; Short=AtAPx06; Short=tAPX; Flags: Precursor;	------	------	------
TRINITY_DN5822_c0_g1	219	GO:0042744; GO:0006979; GO:0005576;GO:0020037; GO:0046872; GO:0004601;	BP:hydrogen peroxide catabolic process;BP:response to oxidative stress;CC:extracellular region;MF:heme binding;MF:metal ion binding;MF:peroxidase activity;	K00430	E1.11.1.7	map00940;	Phenylpropanoid biosynthesis;	------	------	------	------	XP_010686841.1;	PREDICTED: peroxidase 42 [Beta vulgaris subsp. vulgaris];	gi|26397890|sp|Q9SB81.2|PER42_ARATH;	RecName: Full=Peroxidase 42; Short=Atperox P42; AltName: Full=ATP1a/ATP1b; AltName: Full=PRXR1; Flags: Precursor;	------	------	------
TRINITY_DN58305_c0_g1	1135	GO:0042744; GO:0006979; GO:0042744; GO:0006979; GO:0005576; GO:0016021; GO:0005576; GO:0016021;GO:0020037; GO:0046872; GO:0004601; GO:0020037; GO:0046872; GO:0004601;	BP:hydrogen peroxide catabolic process;BP:response to oxidative stress;BP:hydrogen peroxide catabolic process;BP:response to oxidative stress;CC:extracellular region;CC:integral component of membrane;CC:extracellular region;CC:integral component of membrane;MF:heme binding;MF:metal ion binding;MF:peroxidase activity;MF:heme binding;MF:metal ion binding;MF:peroxidase activity;	K00430	E1.11.1.7	map00940;	Phenylpropanoid biosynthesis;	------	------	NOG131444;	G:Carbohydrate transport and metabolism;	XP_010693839.1;	PREDICTED: peroxidase 17 [Beta vulgaris subsp. vulgaris];	gi|25453217|sp|Q9SJZ2.1|PER17_ARATH;	RecName: Full=Peroxidase 17; Short=Atperox P17; AltName: Full=ATP25a; Flags: Precursor;	PF00141.20;	peroxidase;	Peroxidase;
TRINITY_DN61765_c0_g1	420	GO:0042744; GO:0006979;GO:0020037; GO:0046872; GO:0004601;	BP:hydrogen peroxide catabolic process;BP:response to oxidative stress;MF:heme binding;MF:metal ion binding;MF:peroxidase activity;	K00430	E1.11.1.7	map00940;	Phenylpropanoid biosynthesis;	------	------	------	------	XP_021858454.1;	peroxidase 5-like [Spinacia oleracea];	gi|300669658|sp|A7QEU4.2|PER5_VITVI;	RecName: Full=Peroxidase 5; Flags: Precursor;	PF00141.20;	peroxidase;	Peroxidase;
TRINITY_DN63082_c0_g1	458	GO:0042744; GO:0006979; GO:0005576;GO:0020037; GO:0046872; GO:0004601;	BP:hydrogen peroxide catabolic process;BP:response to oxidative stress;CC:extracellular region;MF:heme binding;MF:metal ion binding;MF:peroxidase activity;	K00430	E1.11.1.7	map00940;	Phenylpropanoid biosynthesis;	------	------	------	------	XP_021766852.1;	peroxidase 29-like [Chenopodium quinoa];	gi|25453211|sp|Q9LSP0.2|PER29_ARATH;	RecName: Full=Peroxidase 29; Short=Atperox P29; AltName: Full=ATP40; Flags: Precursor;	PF00141.20;	peroxidase;	Peroxidase;
TRINITY_DN68201_c0_g1	268	GO:0015074; GO:0015074;GO:0003676; GO:0003964; GO:0003676;	BP:DNA integration;BP:DNA integration;MF:nucleic acid binding;MF:RNA-directed DNA polymerase activity;MF:nucleic acid binding;	------	------	------	------	------	------	------	------	KZV31629.1;	peroxidase 64 [Dorcoceras hygrometricum];	gi|28380144|sp|Q9UR07.1|TF211_SCHPO;	RecName: Full=Transposon Tf2-11 polyprotein; AltName: Full=Retrotransposable element Tf2 155 kDa protein;	------	------	------
TRINITY_DN72847_c0_g1	497	GO:0045454; GO:0045454; GO:0009543; GO:0005623;GO:0004601; GO:0051920; GO:0016209; GO:0016491;	BP:cell redox homeostasis;BP:cell redox homeostasis;CC:chloroplast thylakoid lumen;CC:cell;MF:peroxidase activity;MF:peroxiredoxin activity;MF:antioxidant activity;MF:oxidoreductase activity;	K03564	BCP, PRXQ, DOT5	------	------	------	------	------	------	XP_010687556.1;	PREDICTED: peroxiredoxin Q, chloroplastic [Beta vulgaris subsp. vulgaris];	gi|75324751|sp|Q6UBI3.1|PERQ_SUASA;	RecName: Full=Peroxiredoxin Q, chloroplastic; AltName: Full=Thioredoxin reductase; Flags: Precursor;	PF00578.18; PF08534.7;	AhpC-TSA;Redoxin;	AhpC/TSA family;Redoxin;
TRINITY_DN7730_c0_g1	337	------	------	------	------	------	------	------	------	------	------	XP_021852113.1;	peroxidase 17-like [Spinacia oleracea];	------	------	------	------	------
TRINITY_DN81484_c0_g1	329	GO:0016021;GO:0016688;	CC:integral component of membrane;MF:L-ascorbate peroxidase activity;	------	------	------	------	------	------	------	------	PIN10219.1;	L-ascorbate peroxidase [Handroanthus impetiginosus];	------	------	------	------	------
