# Supplementary material for: Transcriptomic analysis reveals key genes related to antioxidant mechanisms of Hylocereus undatus quality improvement by trypsin during storage
Source: Royal Society of Chemistry journal article supplement (doi:10.1039/c9fo00809h), 2019-01-01
Supplement: c9fo00809h12.xlsx [file c9fo00809h12.xlsx]

## Sheet: Sheet3
Name	shared name	Gene_id	NR description	FC(E/C)	Log2FC(E/C)	Pvalue	FDR	Significant	Regulate
HuCAT	CAT	TRINITY_DN52071_c2_g1	catalase [Hylocereus undatus]	1.771	0.824376	0.00251298	0.259863	yes	up
HuFSD2	FSD2	TRINITY_DN50446_c0_g1	superoxide dismutase [Fe], chloroplastic-like isoform X2 [Chenopodium quinoa]	1.179	0.237132	0.433692	0.998057	no	up
HuFSD3	FSD3	TRINITY_DN47371_c0_g1	superoxide dismutase [Fe] 3, chloroplastic-like isoform X1 [Chenopodium quinoa]	1.178	0.236417	0.446613	0.998057	no	up
HuCSD1	CSD1	TRINITY_DN49764_c0_g1	superoxide dismutase [Cu-Zn] [Chenopodium quinoa]	0.695	-0.524341	0.113704	0.940777	no	down
HuCSD3	CSD3	TRINITY_DN46445_c0_g1	Superoxide dismutase [Cu-Zn] 2	0.853	-0.23016	0.519088	0.998057	no	down
HuMSD1	MSD1	TRINITY_DN40737_c0_g3	superoxide dismutase [Mn], mitochondrial [Spinacia oleracea]	0.92	-0.120212	0.658265	0.998057	no	down
HuCCS	CCS	TRINITY_DN51725_c0_g1	copper chaperone for superoxide dismutase, chloroplastic/cytosolic-like isoform X1 [Chenopodium quinoa]	1.147	0.197972	0.481781	0.998057	no	up
HuTAPX	TAPX	TRINITY_DN52298_c0_g1	thylakoid-bound L-ascorbate peroxidase precursor [Mesembryanthemum crystallinum]	1.487	0.572286	0.171061	0.993402	no	up
HuAPX1	APX1	TRINITY_DN45160_c0_g1	PREDICTED: L-ascorbate peroxidase, cytosolic [Beta vulgaris subsp. vulgaris]	0.937	-0.0933022	0.747996	0.998057	no	down
HuAPX3	APX3	TRINITY_DN47343_c0_g1	cytosolic ascorbate peroxidase [Mesembryanthemum crystallinum]	0.825	-0.277959	0.386271	0.998057	no	down
HuAPX2	APX2	TRINITY_DN44390_c0_g1	L-ascorbate peroxidase [Handroanthus impetiginosus]	1.286	0.363227	0.199858	0.998057	no	up
HuGPX6	GPX6	TRINITY_DN47130_c1_g1	PREDICTED: probable phospholipid hydroperoxide glutathione peroxidase 6, mitochondrial isoform X2 [Brassica oleracea var. oleracea]	1.262	0.33612	0.195908	0.998057	no	up
HuGPX8	GPX8	TRINITY_DN44574_c0_g1	PREDICTED: probable glutathione peroxidase 8 [Cucumis melo]	1.116	0.158306	0.564316	0.998057	no	up
HuGPX3	GPX3	TRINITY_DN36875_c0_g2	probable glutathione peroxidase 2 [Chenopodium quinoa]	0.892	-0.16569	0.615877	0.998057	no	down
HuPOD5	POD5	TRINITY_DN49807_c5_g2	peroxidase 5-like [Chenopodium quinoa]	1.989	0.991861	0.0170803	0.53726	yes	up
HuPOD13	POD44	TRINITY_DN41526_c1_g1	peroxidase 57-like [Chenopodium quinoa]	1.804	0.850906	0.0153455	0.526231	yes	up
HuPOD25	POD25	TRINITY_DN52064_c6_g1	peroxidase 25 [Beta vulgaris subsp. vulgaris]	0.464	-1.10626	0.0126818	0.504631	yes	down
HuPOD63	POD63	TRINITY_DN42089_c0_g1	peroxidase 31-like [Chenopodium quinoa]	0.547	-0.870264	0.0172996	0.540252	yes	down
HuPOD4	POD4	TRINITY_DN6894_c0_g1	peroxidase P7-like [Chenopodium quinoa]	0.56	-0.837404	0.034068	1	yes	down
HuPOD12	POD12	TRINITY_DN44270_c0_g1	Peroxidase 12 [Cajanus cajan]	0.571	-0.807398	0.045183	0.7631	yes	down
HuPOD72	AT5G66390	TRINITY_DN39475_c0_g1	peroxidase 72-like [Chenopodium quinoa]	0.234	-2.09339	6.41036e-07	0.00156874	yes	down
HuPOD44	AT4G26010	TRINITY_DN32434_c0_g1	peroxidase 44-like [Spinacia oleracea]	0.361	-1.47148	0.000915056	0.161102	yes	down
HuPOD20	AT2G35380	TRINITY_DN38461_c0_g1	peroxidase 20-like isoform X2 [Chenopodium quinoa]	0.377	-1.40922	0.00150203	0.192762	yes	down
HuPER64	PER64	TRINITY_DN47307_c0_g1	peroxidase 64-like [Spinacia oleracea]	1.41	0.495904	0.112329	0.939975	no	up
