# Supplementary material for: Transcriptomic analysis reveals key genes related to antioxidant mechanisms of Hylocereus undatus quality improvement by trypsin during storage
Source: Royal Society of Chemistry journal article supplement (doi:10.1039/c9fo00809h), 2019-01-01
Supplement: c9fo00809h13.xlsx [file c9fo00809h13.xlsx]

## Sheet: GO富集分析统计表
Pattern	GO ID	Term Type	Description	P-value	FDR
Up-regualted	GO:0072593	BP	reactive oxygen species metabolic process	4.19578e-12	9.93836e-09
	GO:0006979	BP	response to oxidative stress	2.07933e-11	1.84633e-08
	GO:0050896	BP	response to stimulus	2.96376e-11	1.84633e-08
	GO:0042744	BP	hydrogen peroxide catabolic process	2.98254e-11	1.84633e-08
	GO:0042743	BP	hydrogen peroxide metabolic process	3.3454e-11	1.84633e-08
	GO:0006950	BP	response to stress	4.29658e-11	2.15571e-08
	GO:0044712	BP	single-organism catabolic process	9.90109e-11	4.20339e-08
	GO:0044248	BP	cellular catabolic process	5.15365e-09	2.03164e-06
	GO:0009056	BP	catabolic process	1.64041e-07	5.65837e-05
	GO:0044763	BP	single-organism cellular process	3.47717e-06	0.00106614
	GO:0044699	BP	single-organism process	7.04363e-06	0.00194369
	GO:0034599	BP	cellular response to oxidative stress	6.02684e-05	0.0151192
	GO:0044710	BP	single-organism metabolic process	0.00016999	0.0407901
	GO:0045454	BP	cell redox homeostasis	0.000197404	0.0453948
	GO:0000302	BP	response to reactive oxygen species	0.000227559	0.0502359
	GO:0019725	BP	cellular homeostasis	0.000544622	0.111325
	GO:0070887	BP	cellular response to chemical stimulus	0.000738635	0.14559
	GO:0008150	BP	biological_process	0.000767294	0.146024
	GO:0042592	BP	homeostatic process	0.00140455	0.258389
	GO:0065008	BP	regulation of biological quality	0.00313976	0.54151
	GO:0010431	BP	seed maturation	0.0047613	0.750789
	GO:0071704	BP	organic substance metabolic process	0.00636452	0.963967
	GO:0021700	BP	developmental maturation	0.00713389	1
	GO:0033554	BP	cellular response to stress	0.00866382	1
	GO:1901700	BP	response to oxygen-containing compound	0.00971363	1
	GO:0051716	BP	cellular response to stimulus	0.0106078	1
	GO:0044238	BP	primary metabolic process	0.0116107	1
	GO:0048609	BP	multicellular organismal reproductive process	0.011863	1
	GO:0009987	BP	cellular process	0.0158671	1
	GO:0009845	BP	seed germination	0.0200876	1
	GO:0006801	BP	superoxide metabolic process	0.0224256	1
	GO:0006298	BP	mismatch repair	0.0282474	1
	GO:0042221	BP	response to chemical	0.0326411	1
	GO:0044237	BP	cellular metabolic process	0.0472631	1
	GO:0005576	CC	extracellular region	0.00205439	0.365747
	GO:0031978	CC	plastid thylakoid lumen	0.0047613	0.750789
	GO:0009543	CC	chloroplast thylakoid lumen	0.0047613	0.750789
	GO:0005623	CC	cell	0.00646254	0.963967
	GO:0031977	CC	thylakoid lumen	0.00831817	1
	GO:0046906	MF	tetrapyrrole binding	2.78169e-12	9.93836e-09
	GO:0004601	MF	peroxidase activity	5.40226e-12	9.93836e-09
	GO:0016684	MF	oxidoreductase activity, acting on peroxide as acceptor	8.07249e-12	1.1138e-08
	GO:0016209	MF	antioxidant activity	2.8975e-11	1.84633e-08
	GO:0016491	MF	oxidoreductase activity	3.22516e-11	1.84633e-08
	GO:0020037	MF	heme binding	7.99362e-11	3.6764e-08
	GO:0004602	MF	glutathione peroxidase activity	1.43498e-08	5.27977e-06
	GO:0004130	MF	cytochrome-c peroxidase activity	1.34694e-06	0.000437281
	GO:0004096	MF	catalase activity	4.03795e-06	0.00117292
	GO:0016688	MF	L-ascorbate peroxidase activity	8.07017e-06	0.00212092
	GO:0003824	MF	catalytic activity	0.000291635	0.0619052
	GO:0004784	MF	superoxide dismutase activity	0.00950112	1
	GO:0051920	MF	peroxiredoxin activity	0.00950112	1
	GO:0016721	MF	oxidoreductase activity, acting on superoxide radicals as acceptor	0.00950112	1
	GO:0046872	MF	metal ion binding	0.0145376	1
	GO:0043169	MF	cation binding	0.0149818	1
	GO:0030983	MF	mismatched DNA binding	0.0270857	1
Down-regulated	GO:0009056	BP	catabolic process	7.70846e-12	9.7228e-09
	GO:0072593	BP	reactive oxygen species metabolic process	8.88772e-12	9.7228e-09
	GO:0050896	BP	response to stimulus	1.15049e-11	9.7228e-09
	GO:0044248	BP	cellular catabolic process	1.20314e-11	9.7228e-09
	GO:0042744	BP	hydrogen peroxide catabolic process	2.14277e-11	1.0675e-08
	GO:0044710	BP	single-organism metabolic process	2.40111e-11	1.0675e-08
	GO:0042743	BP	hydrogen peroxide metabolic process	2.45148e-11	1.0675e-08
	GO:0044763	BP	single-organism cellular process	3.09654e-11	1.13932e-08
	GO:0044712	BP	single-organism catabolic process	3.79499e-11	1.30904e-08
	GO:0006979	BP	response to oxidative stress	5.50652e-11	1.76611e-08
	GO:0006950	BP	response to stress	5.7601e-11	1.76611e-08
	GO:0044699	BP	single-organism process	8.26554e-11	2.07352e-08
	GO:0044237	BP	cellular metabolic process	2.57727e-09	5.92666e-07
	GO:0008150	BP	biological_process	4.53797e-08	1.0018e-05
	GO:0009987	BP	cellular process	1.51129e-07	3.08919e-05
	GO:0008152	BP	metabolic process	3.6427e-07	7.18002e-05
	GO:0071704	BP	organic substance metabolic process	1.59722e-05	0.00259266
	GO:0044238	BP	primary metabolic process	3.29971e-05	0.00505863
	GO:0071493	BP	cellular response to UV-B	0.00219642	0.242441
	GO:0071457	BP	cellular response to ozone	0.00219642	0.242441
	GO:0071472	BP	cellular response to salt stress	0.00219642	0.242441
	GO:0071486	BP	cellular response to high light intensity	0.00219642	0.242441
	GO:0034644	BP	cellular response to UV	0.00438816	0.366943
	GO:0071470	BP	cellular response to osmotic stress	0.00438816	0.366943
	GO:0034614	BP	cellular response to reactive oxygen species	0.00657522	0.525922
	GO:0071484	BP	cellular response to light intensity	0.00657522	0.525922
	GO:0010224	BP	response to UV-B	0.00875761	0.671295
	GO:0010193	BP	response to ozone	0.0152769	1
	GO:0009644	BP	response to high light intensity	0.0152769	1
	GO:0009411	BP	response to UV	0.0174407	1
	GO:0071482	BP	cellular response to light stimulus	0.0174407	1
	GO:0071478	BP	cellular response to radiation	0.0195999	1
	GO:0034599	BP	cellular response to oxidative stress	0.0217545	1
	GO:0071214	BP	cellular response to abiotic stimulus	0.0217545	1
	GO:0071229	BP	cellular response to acid chemical	0.0388264	1
	GO:0006801	BP	superoxide metabolic process	0.0409399	1
	GO:0000302	BP	response to reactive oxygen species	0.0409399	1
	GO:0009642	BP	response to light intensity	0.0409399	1
	GO:1901701	BP	cellular response to oxygen-containing compound	0.043049	1
	GO:0005576	CC	extracellular region	2.43068e-11	1.0675e-08
	GO:0005575	CC	cellular_component	9.4726e-06	0.00158422
	GO:0044464	CC	cell part	0.00470892	0.387888
	GO:0044424	CC	intracellular part	0.0191231	1
	GO:0044425	CC	membrane part	0.0360681	1
	GO:0046872	MF	metal ion binding	1.09732e-11	9.7228e-09
	GO:0004601	MF	peroxidase activity	1.18589e-11	9.7228e-09
	GO:0043169	MF	cation binding	1.23319e-11	9.7228e-09
	GO:0016684	MF	oxidoreductase activity, acting on peroxide as acceptor	1.87481e-11	1.0675e-08
	GO:0043167	MF	ion binding	2.51449e-11	1.0675e-08
	GO:0020037	MF	heme binding	2.91224e-11	1.13932e-08
	GO:0016491	MF	oxidoreductase activity	6.47064e-11	1.81361e-08
	GO:0046906	MF	tetrapyrrole binding	6.57224e-11	1.81361e-08
	GO:0016209	MF	antioxidant activity	8.03045e-11	2.07352e-08
	GO:0003824	MF	catalytic activity	8.70893e-11	2.08976e-08
	GO:0005488	MF	binding	9.16916e-08	1.94633e-05
	GO:1901363	MF	heterocyclic compound binding	4.63783e-07	8.58527e-05
	GO:0097159	MF	organic cyclic compound binding	4.66675e-07	8.58527e-05
	GO:0004784	MF	superoxide dismutase activity	5.39512e-07	9.3049e-05
	GO:0016721	MF	oxidoreductase activity, acting on superoxide radicals as acceptor	5.39512e-07	9.3049e-05
	GO:0003674	MF	molecular_function	0.00259431	0.256993
	GO:0016688	MF	L-ascorbate peroxidase activity	0.00875761	0.671295
	GO:0004602	MF	glutathione peroxidase activity	0.0109353	0.826742
	GO:0030060	MF	L-malate dehydrogenase activity	0.049349	1
