# Supplementary material for: Transcriptomic analysis reveals key genes related to antioxidant mechanisms of Hylocereus undatus quality improvement by trypsin during storage
Source: Royal Society of Chemistry journal article supplement (doi:10.1039/c9fo00809h), 2019-01-01
Supplement: c9fo00809h14.xlsx [file c9fo00809h14.xlsx]

## Sheet: 表达差异详情表
Gene_id	Description	FC(E/C)	Log2FC(E/C)	Pvalue	Padjust	Significant	Regulate
TRINITY_DN39475_c0_g1	peroxidase 72-like [Chenopodium quinoa]	0.234	-2.09339	6.41036e-07	0.00156874	yes	down
TRINITY_DN32434_c0_g1	peroxidase 44-like [Spinacia oleracea]	0.361	-1.47148	0.000915056	0.161102	yes	down
TRINITY_DN38461_c0_g1	PREDICTED: peroxidase 20 [Beta vulgaris subsp. vulgaris]	0.377	-1.40922	0.00150203	0.192762	yes	down
TRINITY_DN52071_c2_g1	catalase [Hylocereus undatus]	1.771	0.824376	0.00251298	0.259863	yes	up
TRINITY_DN52064_c6_g1	PREDICTED: peroxidase 25 [Beta vulgaris subsp. vulgaris]	0.464	-1.10626	0.0126818	0.504631	yes	down
TRINITY_DN41526_c1_g1	peroxidase 57-like [Chenopodium quinoa]	1.804	0.850906	0.0153455	0.526231	yes	up
TRINITY_DN49807_c5_g2	peroxidase 5-like [Chenopodium quinoa]	1.989	0.991861	0.0170803	0.53726	yes	up
TRINITY_DN42089_c0_g1	peroxidase 31-like [Chenopodium quinoa]	0.547	-0.870264	0.0172996	0.540252	yes	down
TRINITY_DN6894_c0_g1	peroxidase P7-like [Chenopodium quinoa]	0.56	-0.837404	0.034068	1	yes	down
TRINITY_DN44270_c0_g1	Peroxidase 12 [Cajanus cajan]	0.571	-0.807398	0.045183	0.7631	yes	down
TRINITY_DN47307_c0_g1	peroxidase 64-like [Chenopodium quinoa]	1.41	0.495904	0.112329	0.939975	no	up
TRINITY_DN49764_c0_g1	superoxide dismutase [Cu-Zn] [Ananas comosus]	0.695	-0.524341	0.113704	0.940777	no	down
TRINITY_DN58305_c0_g1	PREDICTED: peroxidase 17 [Beta vulgaris subsp. vulgaris]	0.619	-0.692862	0.118061	1	no	down
TRINITY_DN43838_c0_g1	uncharacterized protein LOC110776789 isoform X1 [Spinacia oleracea]	1.417	0.502954	0.154239	0.97823	no	up
TRINITY_DN38065_c0_g1	peroxidase 16-like [Spinacia oleracea]	0.686	-0.543707	0.156234	0.978931	no	down
TRINITY_DN52298_c0_g1	thylakoid-bound L-ascorbate peroxidase precursor [Mesembryanthemum crystallinum]	1.487	0.572286	0.171061	0.993402	no	up
TRINITY_DN47181_c0_g1	peroxidase N-like [Chenopodium quinoa]	1.391	0.47659	0.187192	0.998057	no	up
TRINITY_DN47130_c1_g1	PREDICTED: probable phospholipid hydroperoxide glutathione peroxidase 6, mitochondrial isoform X1 [Brassica oleracea var. oleracea]	1.262	0.33612	0.195908	0.998057	no	up
TRINITY_DN44390_c0_g1	L-ascorbate peroxidase [Handroanthus impetiginosus]	1.286	0.363227	0.199858	0.998057	no	up
TRINITY_DN23201_c0_g1	peroxidase 5-like isoform X1 [Spinacia oleracea]	0.696	-0.522688	0.206014	1	no	down
TRINITY_DN37559_c0_g1	PREDICTED: peroxidase 50 [Beta vulgaris subsp. vulgaris]	0.731	-0.452795	0.263174	0.998057	no	down
TRINITY_DN34922_c0_g1	peroxidase 12-like [Chenopodium quinoa]	0.725	-0.462975	0.263431	1	no	down
TRINITY_DN45623_c0_g1	peroxidase P7-like [Chenopodium quinoa]	0.763	-0.389546	0.276961	0.998057	no	down
TRINITY_DN27752_c0_g1	PREDICTED: peroxidase 57 [Beta vulgaris subsp. vulgaris]	0.723	-0.467593	0.287339	0.998057	no	down
TRINITY_DN41551_c0_g1	putative L-ascorbate peroxidase 6 [Chenopodium quinoa]	1.287	0.36437	0.289453	0.998057	no	up
TRINITY_DN38638_c0_g1	peroxiredoxin Q, chloroplastic-like [Chenopodium quinoa]	1.358	0.441265	0.309366	0.998057	no	up
TRINITY_DN36307_c0_g1	peroxidase 12-like [Chenopodium quinoa]	0.732	-0.449579	0.311229	1	no	down
TRINITY_DN46320_c2_g2	Copper chaperone for superoxide dismutase, chloroplastic/cytosolic [Capsicum chinense]	1.35	0.432643	0.325801	1	no	up
TRINITY_DN52071_c2_g3	leaf catalase [Mesembryanthemum crystallinum]	1.224	0.291019	0.359253	0.998057	no	up
TRINITY_DN39475_c0_g2	PREDICTED: peroxidase 72 [Ricinus communis]	0.836	-0.25785	0.359359	0.998057	no	down
TRINITY_DN51760_c1_g1	PREDICTED: peroxidase 11 [Beta vulgaris subsp. vulgaris]	0.794	-0.333067	0.360169	0.998057	no	down
TRINITY_DN40637_c0_g1	peroxidase P7-like [Chenopodium quinoa]	0.786	-0.346703	0.374603	0.998057	no	down
TRINITY_DN36582_c0_g1	PREDICTED: peroxidase P7-like [Beta vulgaris subsp. vulgaris]	1.269	0.343771	0.374836	0.998057	no	up
TRINITY_DN43553_c0_g1	PREDICTED: peroxidase 11 [Beta vulgaris subsp. vulgaris]	0.819	-0.288317	0.375234	0.998057	no	down
TRINITY_DN47343_c0_g1	cytosolic ascorbate peroxidase [Mesembryanthemum crystallinum]	0.825	-0.277959	0.386271	0.998057	no	down
TRINITY_DN52532_c3_g1	peroxidase 17-like [Spinacia oleracea]	1.29	0.367098	0.404319	0.998057	no	up
TRINITY_DN30823_c0_g1	peroxidase 29 [Spinacia oleracea]	0.786	-0.34778	0.408059	1	no	down
TRINITY_DN36636_c0_g1	PREDICTED: peroxidase 57 [Beta vulgaris subsp. vulgaris]	0.84	-0.251464	0.425492	0.998057	no	down
TRINITY_DN41933_c0_g1	cationic peroxidase 1-like [Chenopodium quinoa]	0.82	-0.285507	0.425845	0.998057	no	down
TRINITY_DN2888_c0_g1	peroxidase 57-like [Spinacia oleracea]	1.253	0.32588	0.42771	1	no	up
TRINITY_DN39313_c0_g1	PREDICTED: peroxidase 5 [Eucalyptus grandis]	0.83	-0.268306	0.430361	0.998057	no	down
TRINITY_DN50446_c0_g1	superoxide dismutase [Fe], chloroplastic-like isoform X2 [Chenopodium quinoa]	1.179	0.237132	0.433692	0.998057	no	up
TRINITY_DN89683_c0_g1	peroxidase 12 [Dorcoceras hygrometricum]	0.836	-0.257826	0.439244	0.998057	no	down
TRINITY_DN47371_c0_g1	superoxide dismutase [Fe] 3, chloroplastic-like isoform X1 [Chenopodium quinoa]	1.178	0.236417	0.446613	0.998057	no	up
TRINITY_DN35728_c0_g1	RecName: Full=Peroxiredoxin Q, chloroplastic; AltName: Full=Thioredoxin peroxidase; Flags: Precursor	1.215	0.281431	0.467161	0.998057	no	up
TRINITY_DN45999_c1_g2	protein OVEREXPRESSOR OF CATIONIC PEROXIDASE 3-like [Chenopodium quinoa]	1.153	0.205747	0.476473	0.998057	no	up
TRINITY_DN45254_c0_g1	peroxidase 12-like [Chenopodium quinoa]	0.838	-0.254194	0.480609	0.998057	no	down
TRINITY_DN51725_c0_g1	copper chaperone for superoxide dismutase, chloroplastic/cytosolic-like [Chenopodium quinoa]	1.147	0.197972	0.481781	0.998057	no	up
TRINITY_DN40737_c0_g2	superoxide dismutase [Mn], mitochondrial-like [Chenopodium quinoa]	0.838	-0.255103	0.493583	0.998057	no	down
TRINITY_DN27926_c0_g1	PREDICTED: peroxidase 12 [Beta vulgaris subsp. vulgaris]	1.186	0.246677	0.513386	1	no	up
TRINITY_DN39090_c0_g1	PREDICTED: peroxidase 46 [Beta vulgaris subsp. vulgaris]	1.177	0.235361	0.515126	1	no	up
TRINITY_DN94547_c0_g1	peroxidase 60-like [Spinacia oleracea]	0.82	-0.286429	0.518041	0.998057	no	down
TRINITY_DN46445_c0_g1	RecName: Full=Superoxide dismutase [Cu-Zn] 2	0.853	-0.23016	0.519088	0.998057	no	down
TRINITY_DN29305_c0_g1	PREDICTED: peroxidase 12 [Beta vulgaris subsp. vulgaris]	0.825	-0.277772	0.521017	1	no	down
TRINITY_DN47652_c0_g1	PREDICTED: probable L-ascorbate peroxidase 6, chloroplastic isoform X1 [Beta vulgaris subsp. vulgaris]	0.858	-0.220938	0.525804	0.998057	no	down
TRINITY_DN47374_c0_g1	PREDICTED: peroxidase 12 [Beta vulgaris subsp. vulgaris]	0.865	-0.208725	0.52859	0.998057	no	down
TRINITY_DN33825_c0_g1	peroxidase 12-like [Olea europaea var. sylvestris]	0.833	-0.263061	0.550483	1	no	down
TRINITY_DN44574_c0_g1	PREDICTED: probable glutathione peroxidase 8 [Cucumis melo]	1.116	0.158306	0.564316	0.998057	no	up
TRINITY_DN36875_c0_g2	probable glutathione peroxidase 2 [Chenopodium quinoa]	0.892	-0.16569	0.615877	0.998057	no	down
TRINITY_DN40737_c0_g3	superoxide dismutase [Mn], mitochondrial [Spinacia oleracea]	0.92	-0.120212	0.658265	0.998057	no	down
TRINITY_DN47130_c0_g1	probable phospholipid hydroperoxide glutathione peroxidase 6, mitochondrial [Capsella rubella]	1.098	0.13487	0.659732	0.998057	no	up
TRINITY_DN46320_c4_g1	Peroxidase 9 [Capsicum baccatum]	1.134	0.181757	0.672922	1	no	up
TRINITY_DN2620_c0_g1	peroxidase 5-like [Chenopodium quinoa]	1.109	0.149343	0.7277	1	no	up
TRINITY_DN34915_c0_g1	PREDICTED: cationic peroxidase 1-like [Beta vulgaris subsp. vulgaris]	0.904	-0.145978	0.727872	0.998057	no	down
TRINITY_DN39834_c0_g1	PREDICTED: putative L-ascorbate peroxidase 6 [Beta vulgaris subsp. vulgaris]	0.909	-0.138149	0.729901	0.998057	no	down
TRINITY_DN52418_c1_g2	peroxidase 17-like [Spinacia oleracea]	1.104	0.142684	0.734292	1	no	up
TRINITY_DN38788_c0_g1	PREDICTED: probable phospholipid hydroperoxide glutathione peroxidase [Beta vulgaris subsp. vulgaris]	0.912	-0.132823	0.743805	0.998057	no	down
TRINITY_DN41723_c0_g1	peroxidase 60-like [Spinacia oleracea]	0.914	-0.129348	0.747991	0.998057	no	down
TRINITY_DN45160_c0_g1	PREDICTED: L-ascorbate peroxidase, cytosolic [Beta vulgaris subsp. vulgaris]	0.937	-0.0933022	0.747996	0.998057	no	down
TRINITY_DN48395_c0_g1	peroxidase 4-like [Chenopodium quinoa]	0.939	-0.0905851	0.783045	0.998057	no	down
TRINITY_DN40490_c0_g2	PREDICTED: protein OVEREXPRESSOR OF CATIONIC PEROXIDASE 3 [Beta vulgaris subsp. vulgaris]	1.061	0.0857814	0.790396	0.998057	no	up
TRINITY_DN37155_c0_g1	peroxidase 1 [Sesuvium portulacastrum]	1.075	0.104905	0.793543	0.998057	no	up
TRINITY_DN27841_c0_g1	PREDICTED: peroxidase 12 [Beta vulgaris subsp. vulgaris]	0.936	-0.0952682	0.829921	1	no	down
TRINITY_DN45458_c15_g4	Copper chaperone for superoxide dismutase, chloroplastic/cytosolic [Capsicum chinense]	0.948	-0.0767261	0.834559	0.998057	no	down
TRINITY_DN23957_c0_g2	peroxidase 4-like [Chenopodium quinoa]	0.983	-0.0251165	0.921357	0.998057	no	down
TRINITY_DN46253_c0_g2	PREDICTED: peroxidase 16 [Beta vulgaris subsp. vulgaris]	0.993	-0.00960056	0.979858	0.998057	no	down
TRINITY_DN30055_c0_g1	peroxidase 57-like [Chenopodium quinoa]	0.993	-0.00971269	0.982349	0.998057	no	down
TRINITY_DN13420_c0_g1	Copper chaperone for superoxide dismutase, chloroplastic/cytosolic [Capsicum chinense]	1	0	1	1	no	no change
TRINITY_DN14459_c0_g1	peroxidase 29-like [Chenopodium quinoa]	1	0	1	1	no	no change
TRINITY_DN15252_c0_g1	Copper chaperone for superoxide dismutase, chloroplastic/cytosolic [Capsicum chinense]	1	0	1	1	no	no change
TRINITY_DN19483_c0_g1	Copper chaperone for superoxide dismutase, chloroplastic/cytosolic [Capsicum chinense]	1	0	1	1	no	no change
TRINITY_DN20653_c0_g1	peroxidase 42 [Chenopodium quinoa]	1	0	1	1	no	no change
TRINITY_DN23107_c0_g1	peroxidase 42 [Chenopodium quinoa]	1	0	1	1	no	no change
TRINITY_DN25499_c0_g1	superoxide dismutase [Cu-Zn] [Quercus suber]	1	0	1	1	no	no change
TRINITY_DN3830_c0_g1	PREDICTED: peroxidase 12 [Beta vulgaris subsp. vulgaris]	1	0	1	1	no	no change
TRINITY_DN52859_c0_g1	PREDICTED: peroxidase 19-like [Nicotiana tabacum]	1	0	1	1	no	no change
TRINITY_DN5822_c0_g1	PREDICTED: peroxidase 42 [Beta vulgaris subsp. vulgaris]	1	0	1	1	no	no change
TRINITY_DN61765_c0_g1	peroxidase 5-like [Spinacia oleracea]	1	0	1	1	no	no change
TRINITY_DN61841_c0_g1	PREDICTED: cationic peroxidase 1-like isoform X1 [Nelumbo nucifera]	1	0	1	1	no	no change
TRINITY_DN63082_c0_g1	peroxidase 29-like [Chenopodium quinoa]	1	0	1	1	no	no change
TRINITY_DN68201_c0_g1	peroxidase 64 [Dorcoceras hygrometricum]	1	0	1	1	no	no change
TRINITY_DN69399_c0_g1	catalase [Klebsormidium nitens]	1	0	1	1	no	no change
TRINITY_DN70711_c0_g1	putative manganese superoxide dismutase protein, partial [Tetraselmis suecica]	1	0	1	1	no	no change
TRINITY_DN72847_c0_g1	PREDICTED: peroxiredoxin Q, chloroplastic [Beta vulgaris subsp. vulgaris]	1	0	1	1	no	no change
TRINITY_DN75704_c0_g1	peroxidase P7 [Carica papaya]	1	0	1	1	no	no change
TRINITY_DN7730_c0_g1	peroxidase 17-like [Spinacia oleracea]	1	0	1	1	no	no change
TRINITY_DN81484_c0_g1	L-ascorbate peroxidase [Handroanthus impetiginosus]	1	0	1	1	no	no change
TRINITY_DN884_c0_g1	heme peroxidase [Cynara cardunculus var. scolymus]	1	0	1	1	no	no change
TRINITY_DN89961_c0_g1	peroxidase 5-like, partial [Quercus suber]	1	0	1	1	no	no change
TRINITY_DN90129_c0_g1	copper and zinc superoxide dismutase [Zoysia japonica]	1	0	1	1	no	no change
TRINITY_DN92235_c0_g1	superoxide dismutase [Mn], mitochondrial-like [Carica papaya]	1	0	1	1	no	no change
TRINITY_DN93604_c0_g1	peroxidase 3-like [Chenopodium quinoa]	1	0	1	1	no	no change
TRINITY_DN97882_c0_g1	PREDICTED: peroxidase P7 [Beta vulgaris subsp. vulgaris]	1	0	1	1	no	no change
TRINITY_DN98654_c0_g1	peroxidase 72-like isoform X2 [Durio zibethinus]	1	0	1	1	no	no change
TRINITY_DN99006_c0_g1	peroxidase 9-like [Chenopodium quinoa]	1	0	1	1	no	no change
