# Supplementary figures and images for: Transcriptomic analysis reveals key genes related to antioxidant mechanisms of Hylocereus undatus quality improvement by trypsin during storage
Source: Royal Society of Chemistry journal article supplement (doi:10.1039/c9fo00809h), 2019-01-01

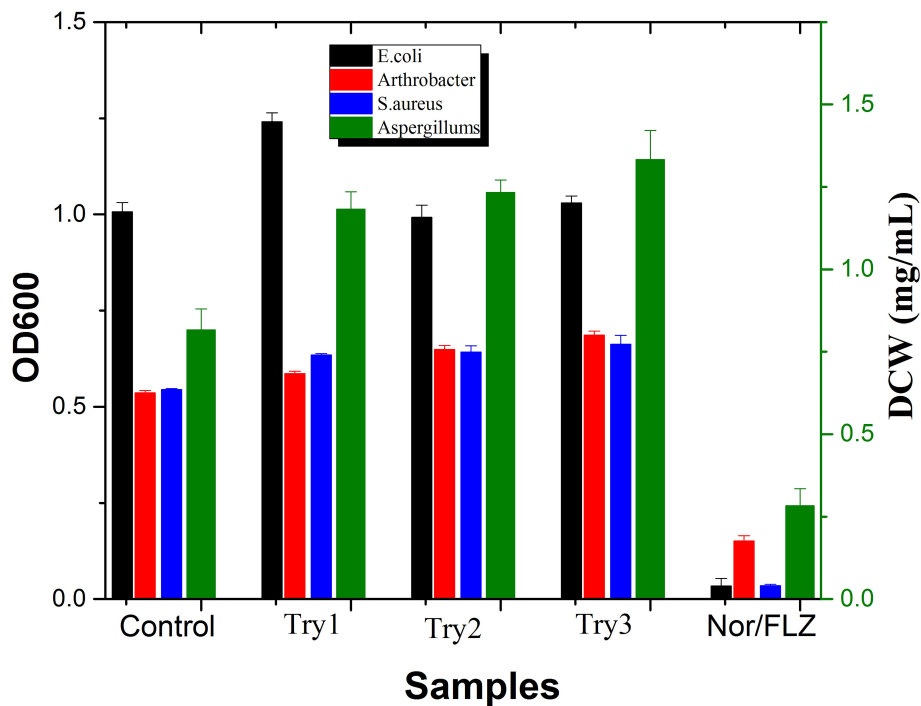

Supplement: c9fo00809h1.pdf [file c9fo00809h1.pdf]
